# Supplementary material for: Monohalogenated carbamates where hydrogen bonding rules without halogen bonding: is there a link between poor carbamate crystal growth andZ′ > 1?
Source: Royal Society of Chemistry journal article supplement (doi:10.1039/c9ce00318e), 2019-01-01
Supplement: c9ce00318e1.pdf [file c9ce00318e1.pdf]

## ELECTRONIC SUPPLEMENTARY INFORMATION FILE

### CXXX CARBAMATES (X = F, Cl, Br)

Pavle Mocijac and John F. Gallagher\*

*School of Chemical Sciences, Dublin City University, Dublin 9, Ireland*

#### TABLE OF CONTENTS for the **CxxF**, **CxxCl** and **CxxBr** isomer grids.

##### SECTION 1

###### **CxxF**

|                          |                     |                                                                                                                           |
|--------------------------|---------------------|---------------------------------------------------------------------------------------------------------------------------|
| <sup>1</sup> H NMR data  | <b>Pages 3-16.</b>  | (run in CD <sub>3</sub> COCD <sub>3</sub> , acetone- <i>d</i> <sub>6</sub> and CDCl <sub>3</sub> , deuterated chloroform) |
| <sup>13</sup> C NMR data | <b>Pages 17-23.</b> |                                                                                                                           |
| <sup>19</sup> F NMR data | <b>Pages 24-30.</b> |                                                                                                                           |
| Infra-red data           | <b>Pages 31-37.</b> |                                                                                                                           |

###### **CxxCl**

|                          |                     |                                                                                                                           |
|--------------------------|---------------------|---------------------------------------------------------------------------------------------------------------------------|
| <sup>1</sup> H NMR data  | <b>Pages 39-56.</b> | (run in CD <sub>3</sub> COCD <sub>3</sub> , acetone- <i>d</i> <sub>6</sub> and CDCl <sub>3</sub> , deuterated chloroform) |
| <sup>13</sup> C NMR data | <b>Pages 57-65.</b> |                                                                                                                           |
| Infra-red data           | <b>Pages 66-74.</b> |                                                                                                                           |

###### **CxxBr**

|                          |                       |                                                                                                                           |
|--------------------------|-----------------------|---------------------------------------------------------------------------------------------------------------------------|
| <sup>1</sup> H NMR data  | <b>Pages 76-90.</b>   | (run in CD <sub>3</sub> COCD <sub>3</sub> , acetone- <i>d</i> <sub>6</sub> and CDCl <sub>3</sub> , deuterated chloroform) |
| <sup>13</sup> C NMR data | <b>Pages 92-99.</b>   |                                                                                                                           |
| Infra-red data           | <b>Pages 100-107.</b> |                                                                                                                           |

SECTION 2    **Crystal structure data**    **Pages 108-112:** (details for nine **CxxF** CIF structures)

SECTION 3    **Ab Initio calculations**    **Pages 112-122:** (for nine **CxxF**, 9 **CxxCl** and 9 **CxxBr**).

SECTION 4    **Table 3**    **Page 123:** Selected structural features.

SECTION 5    **Crystals**    **Page 124:** The three **CopX** crystal samples as examples.

SECTION 6    **Melting point analysis**    **Page 125:** Analysis and trends in the **CxxX** melting points.

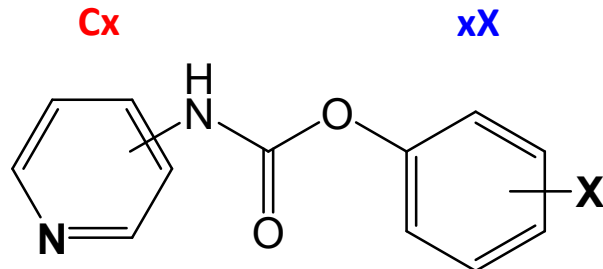

**CxxX series with X = F, Cl, Br**

Schematic diagram of the **CxxX** series of isomers (with **Cx** as the aminopyridine group and **xX** as the halophenyl moiety). The series represents the  $3 \times [3 \times 3]$  isomer grids comprising 27 mono-halogenated carbamate compounds. The methyl (isomer grid) series is represented by **CxxM** (**M** for  $\text{CH}_3$ )<sup>8c</sup> and the methoxy series is **CxxOMe** (OMe = methoxy)<sup>8a</sup> and both the methyl and methoxy are positioned on the phenyl ring in a similar fashion to **CxxX**.

## 1.1. The CxxF isomer grid

|                                |                     |                                                                                                  |
|--------------------------------|---------------------|--------------------------------------------------------------------------------------------------|
| <b><sup>1</sup>H NMR data</b>  | <b>Pages 3-16.</b>  | (run in $\text{CD}_3\text{COCD}_3$ , acetone- $d_6$ and $\text{CDCl}_3$ , deuterated chloroform) |
| <b><sup>13</sup>C NMR data</b> | <b>Pages 17-23.</b> |                                                                                                  |
| <b><sup>19</sup>F NMR data</b> | <b>Pages 24-30.</b> |                                                                                                  |
| <b>Infra-red data</b>          | <b>Pages 31-37.</b> |                                                                                                  |

**Note:** The <sup>1</sup>H NMR data for all 24 synthesised **CxxX** compounds were analysed in  $\text{CD}_3\text{COCD}_3$ , acetone- $d_6$  and  $\text{CDCl}_3$ , deuterated chloroform. It has been noted that for several **CxxX** compounds (*i.e.* **CpoF**, **CmoF**, **CpmCl**, **CpoCl**, **CooCl**, **CpmBr** and **CpoBr**) that the aromatic C-H were observed as overlapping multiplets and often coincidental with residual  $\text{CHCl}_3$  solvent (when run in  $\text{CDCl}_3$ ). The acetone ( $\text{CD}_3\text{COCD}_3$ ) spectra often provided an alternative and cleaner looking spectrum in terms of overlapping aromatic multiplets and solvent peaks in the aromatic region.

**<sup>1</sup>H NMR data and spectra (400 MHz)**

1.1.1.1. **CppF** (Acetone-d<sub>6</sub>, 600 MHz): δ 7.07 (2H, m), 7.15 (2H, m), 7.34 (2H, dd, <sup>3</sup>J = 4.9, <sup>4</sup>J = 1.5), 8.33 (2H, dd, <sup>3</sup>J = 4.8, <sup>4</sup>J = 1.5), 9.5 (1H, br s);

CppF\_HNMR\_Acetone\_d6

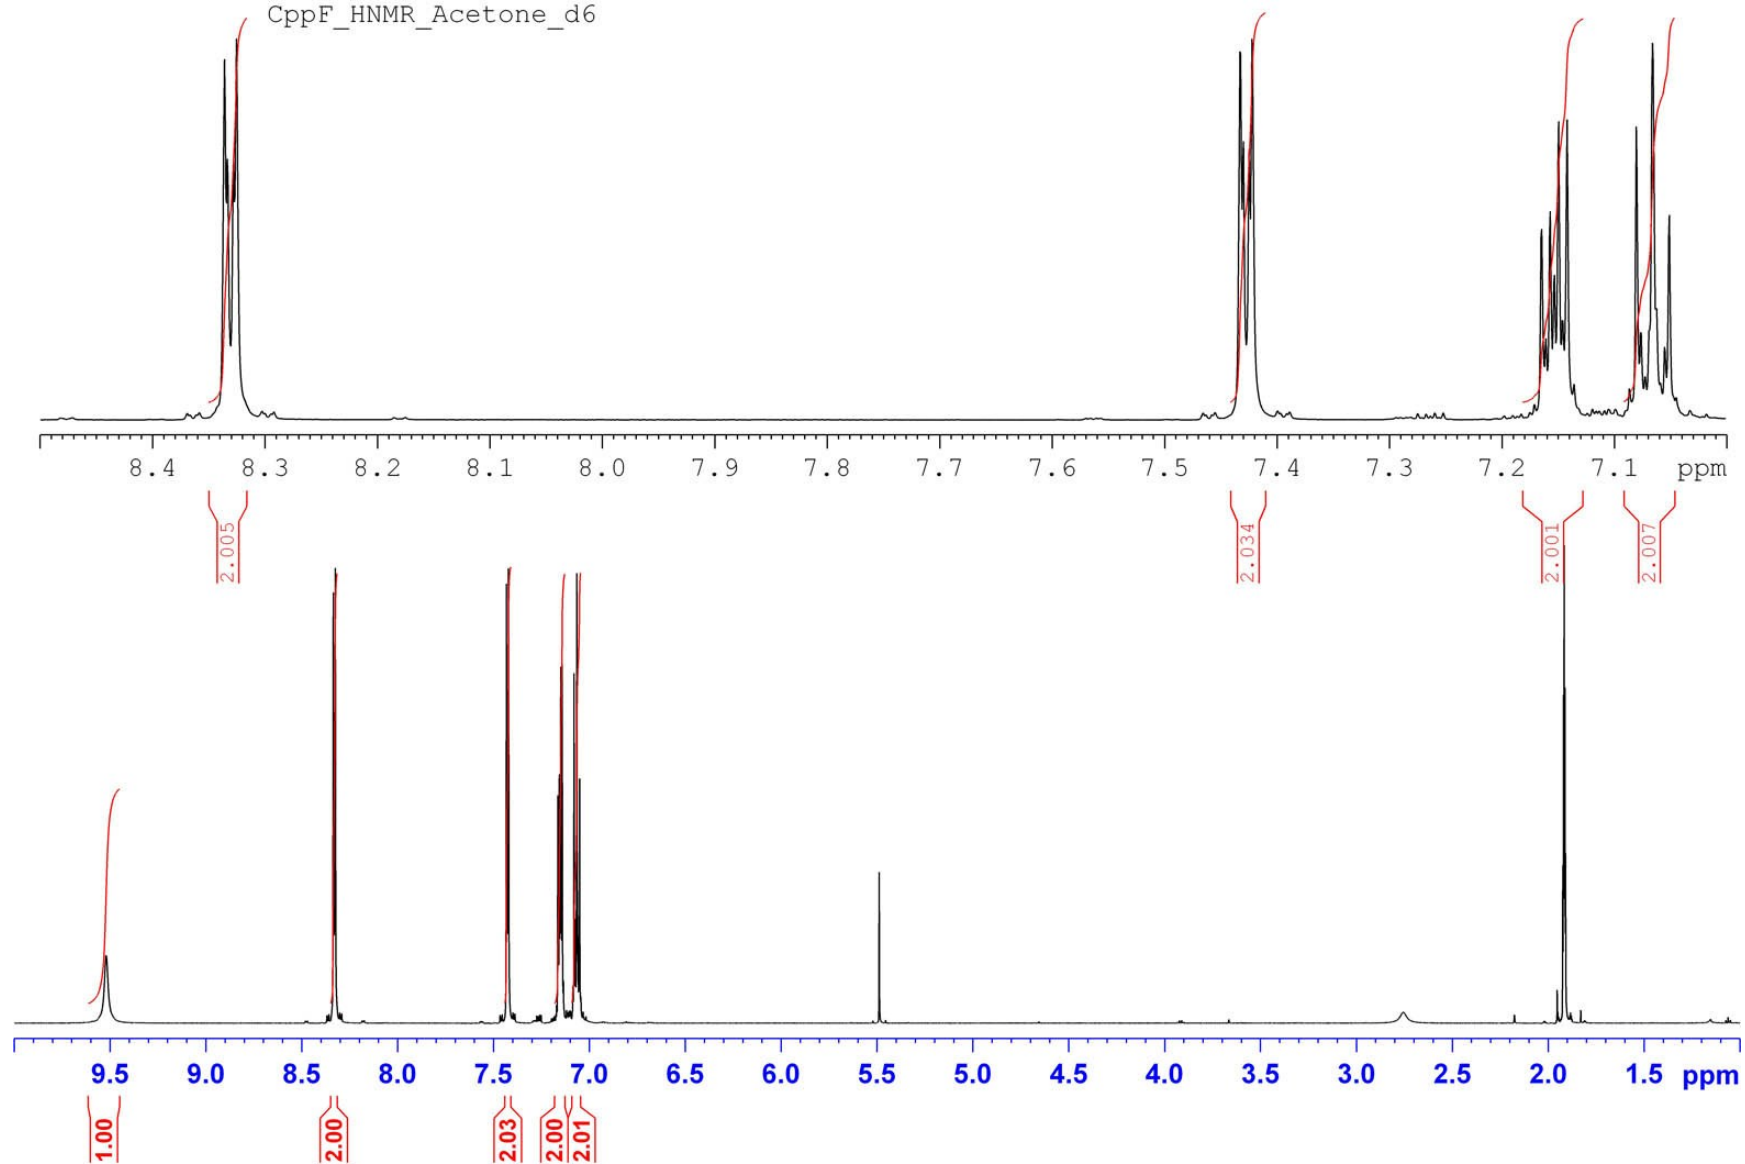

1.1.1.2. **CppF** (CDCl<sub>3</sub>)  $\delta$  7.03 (2H, m), 7.09 (2H, m), 7.30 (1H, br s), 7.34 (2H, dd, <sup>3</sup>J = 4.5, <sup>4</sup>J = 1.5), 8.46 (2H, dd, <sup>3</sup>J = 4.8, <sup>4</sup>J = 1.5)

CppF\_CDC13\_PM

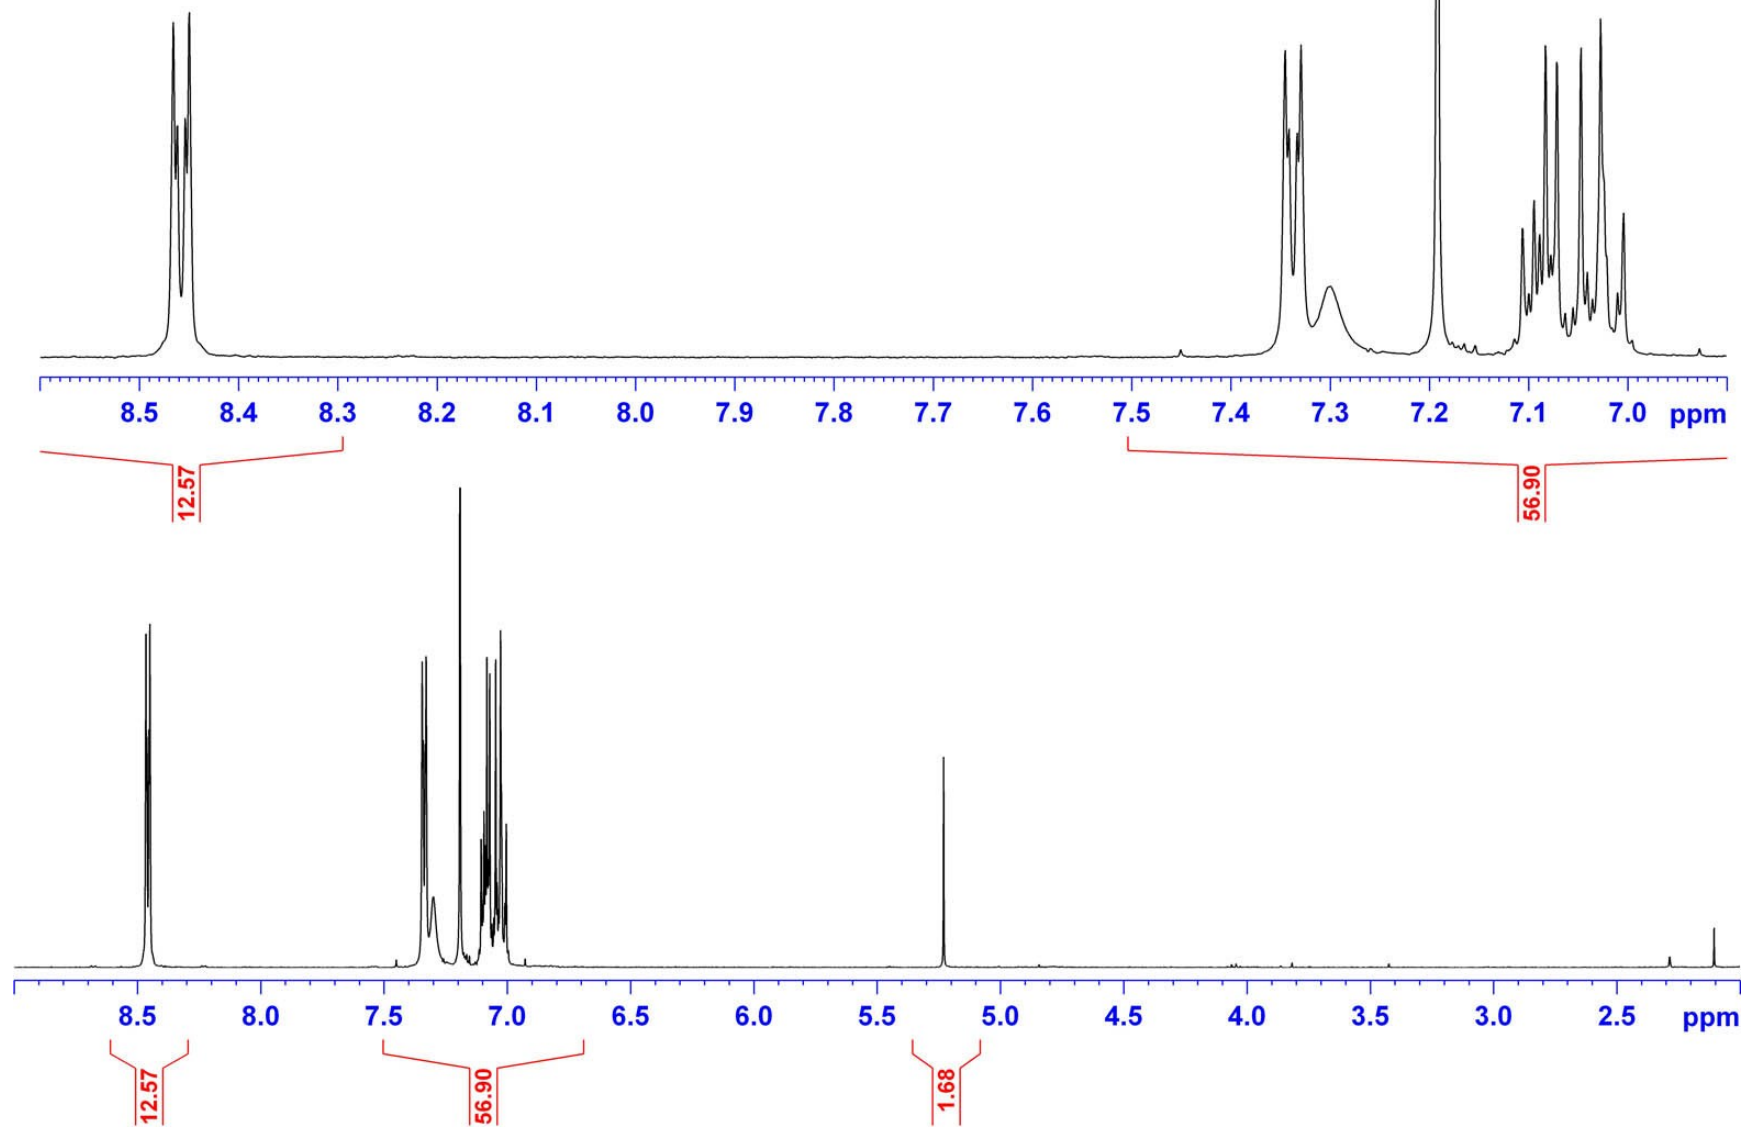



1.1.1.3. **CpmF** (Acetone- $d_6$ ):  $\delta$  7.12 (3H, m), 7.49 (1H, m), 7.58 (2H, dd,  $^3J = 4.5$   $^4J = 1.5$ ), 8.49 (2H, d,  $^3J = 5.2$ ), 9.73 (1H, br s)  
CpmF\_Acd6\_PM

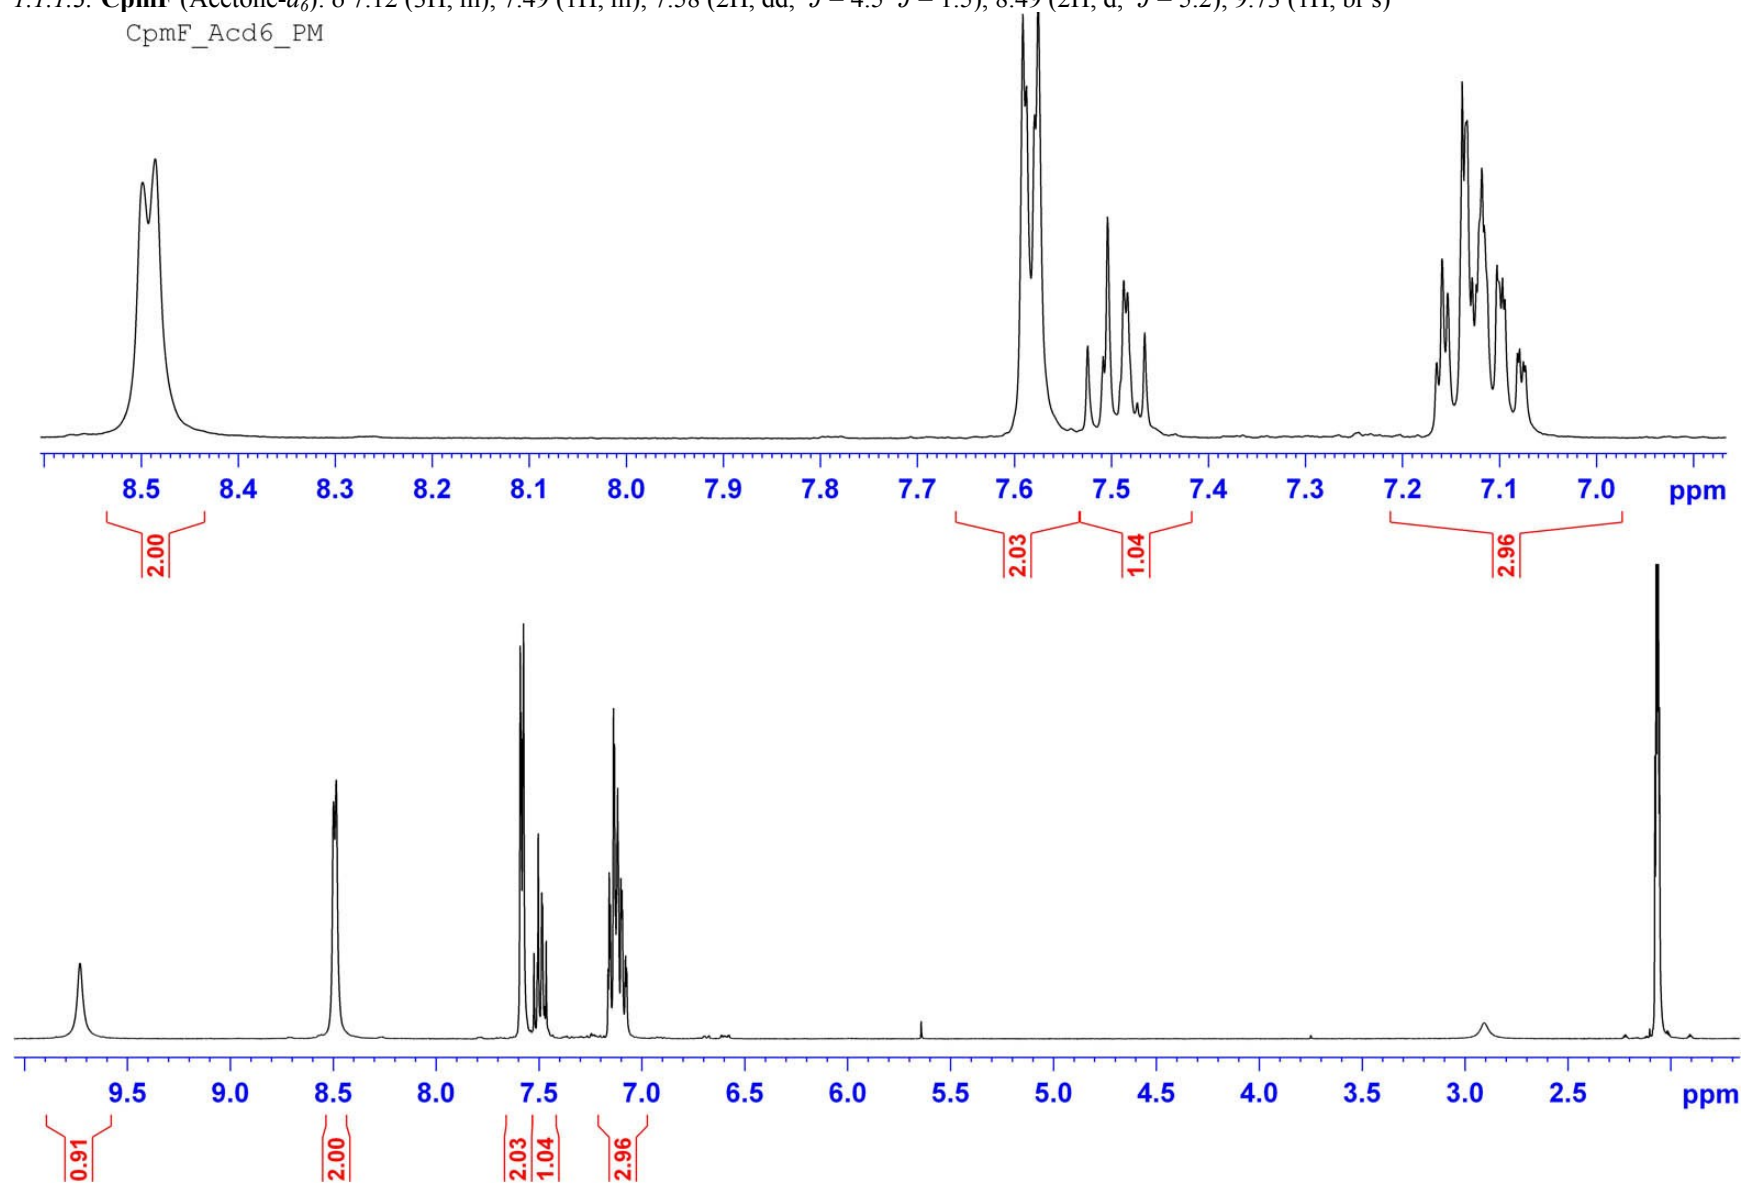

1.1.1.4. **CpmF** (CDCl<sub>3</sub>) δ 6.91 (3H, m), 7.30 (1H, td, <sup>3</sup>J = 8.5 <sup>4</sup>J = 6.6), 7.41 (2H, d, <sup>3</sup>J = 4.9), 8.10 (1H, br s), 8.45 (2H, s);  
CpmF\_CDC13\_PM

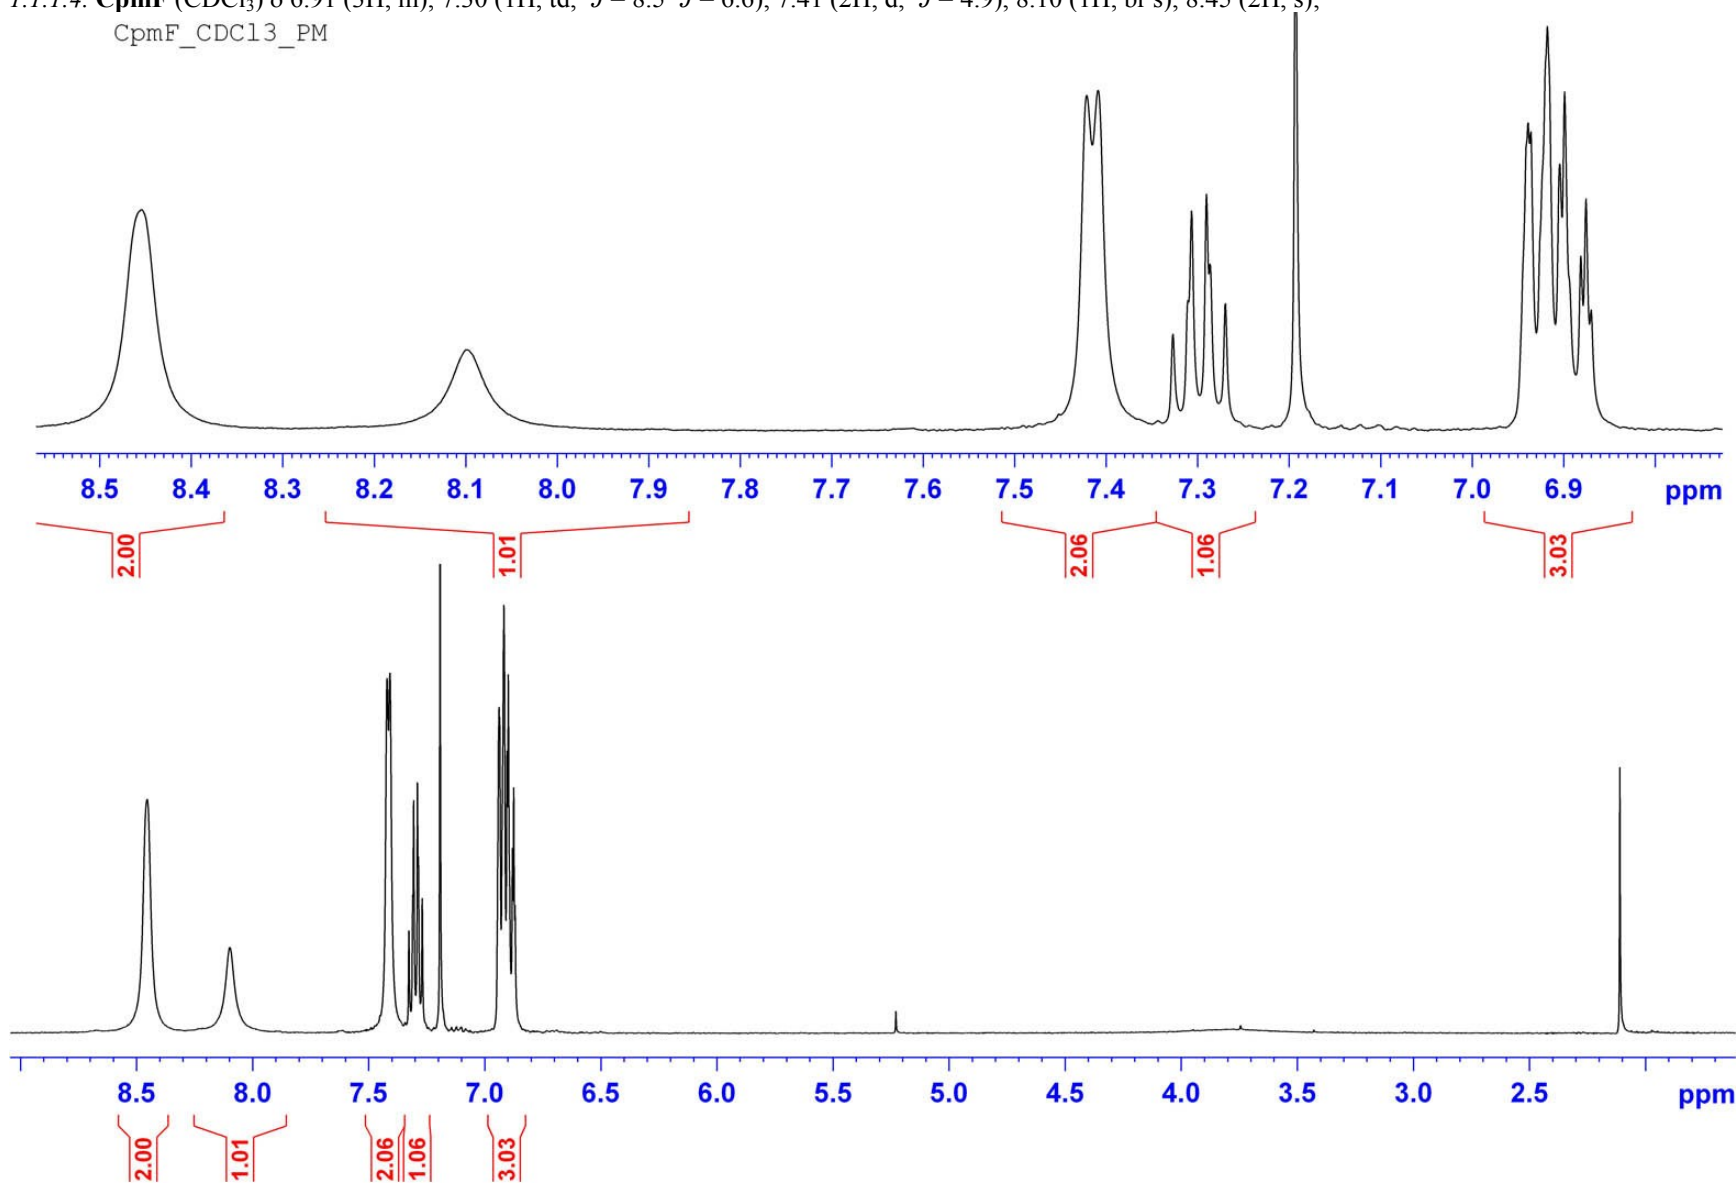

1.1.1.5. **CpoF** (Acetone- $d_6$ ):  $\delta$  7.33 (4H, m), 7.58 (2H, dd,  $^3J=4.9$   $^4J=1.6$ ), 8.5 (2H, dd,  $^3J=5.1$   $^4J=1.5$ ), 9.86 (1H, br s)  
CpoF\_Acd6\_PM

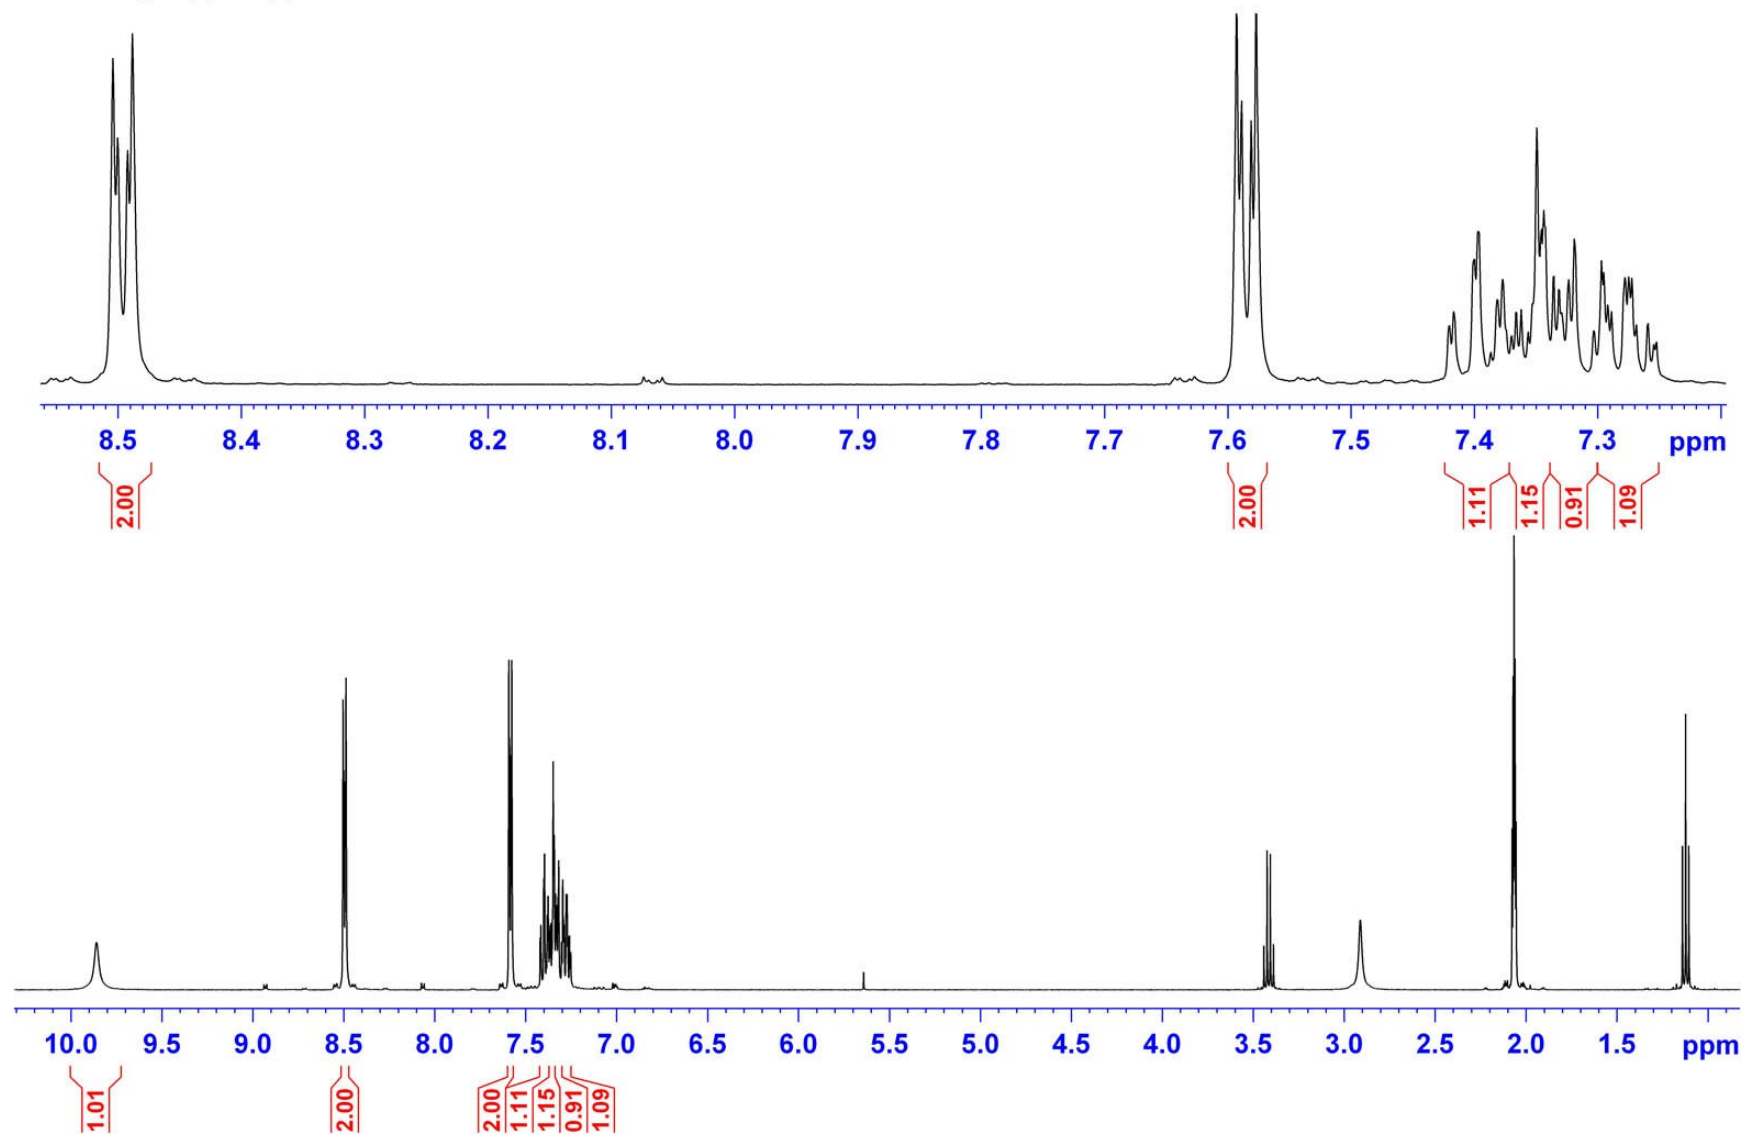

1.1.1.6. **CpoF** (CDCl<sub>3</sub>) δ at 7.11, 7.17 (4H, complex multiplets including CHCl<sub>3</sub> solvent), 7.37 (2H, dd, <sup>3</sup>J = 5.1 <sup>4</sup>J = 1.5), 7.71 (1H, br s), 8.45 (2H, d, <sup>3</sup>J = 4.9)  
CpoF\_CDC13\_PM

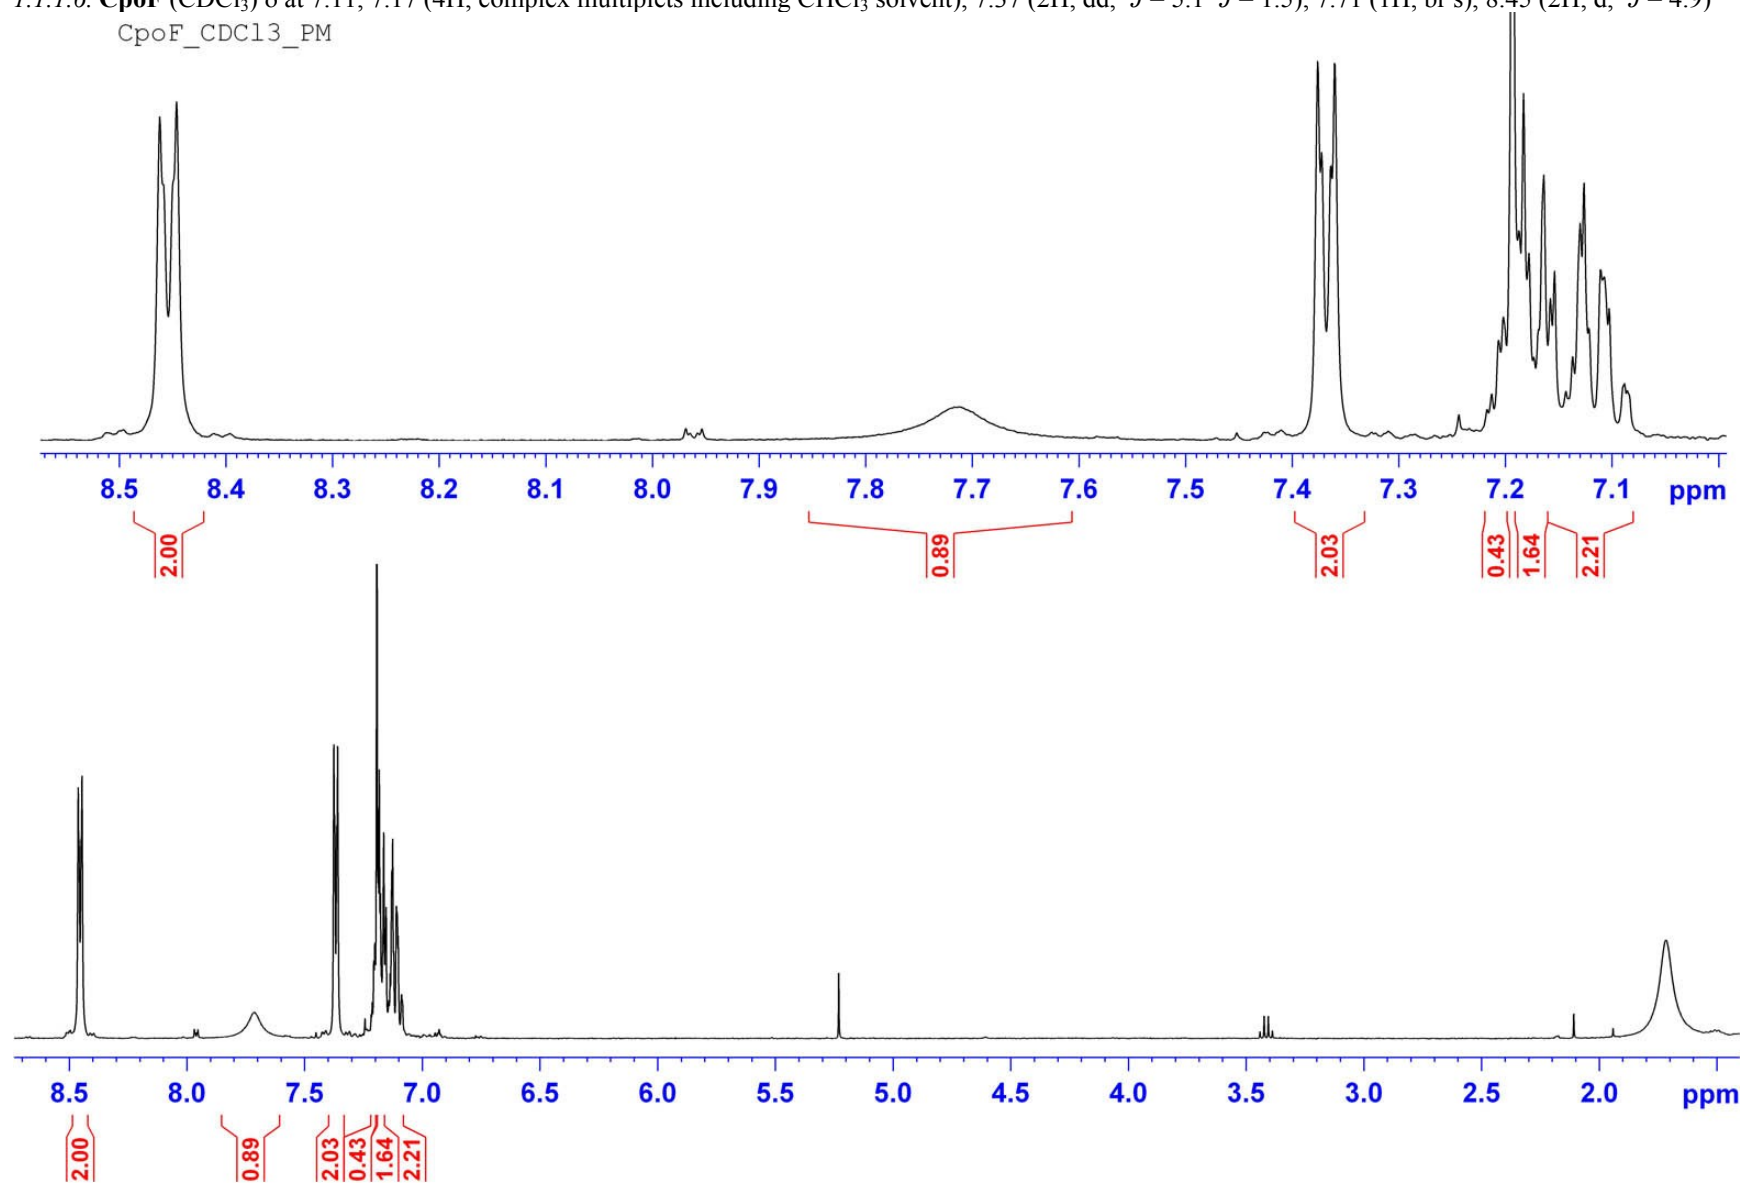

1.1.1.7. **CmpF** (Acetone-d6):  $\delta$  7.21 (2H, m), 7.29 (2H, m), 7.37 (1H, dd,  $^3J=8.3$ ,  $^4J=4.7$ ), 8.07 (1H, ddd,  $^3J=8.4$ ,  $^4J=2.9$ ,  $^5J=1.3$ ), 8.32 (1H, dd,  $^3J=4.8$ ,  $^4J=1.3$ ), 8.78 (1H, d,  $^3J=2.3$ ), 9.45 (1H, br s);

CmpF\_Acd6\_PM

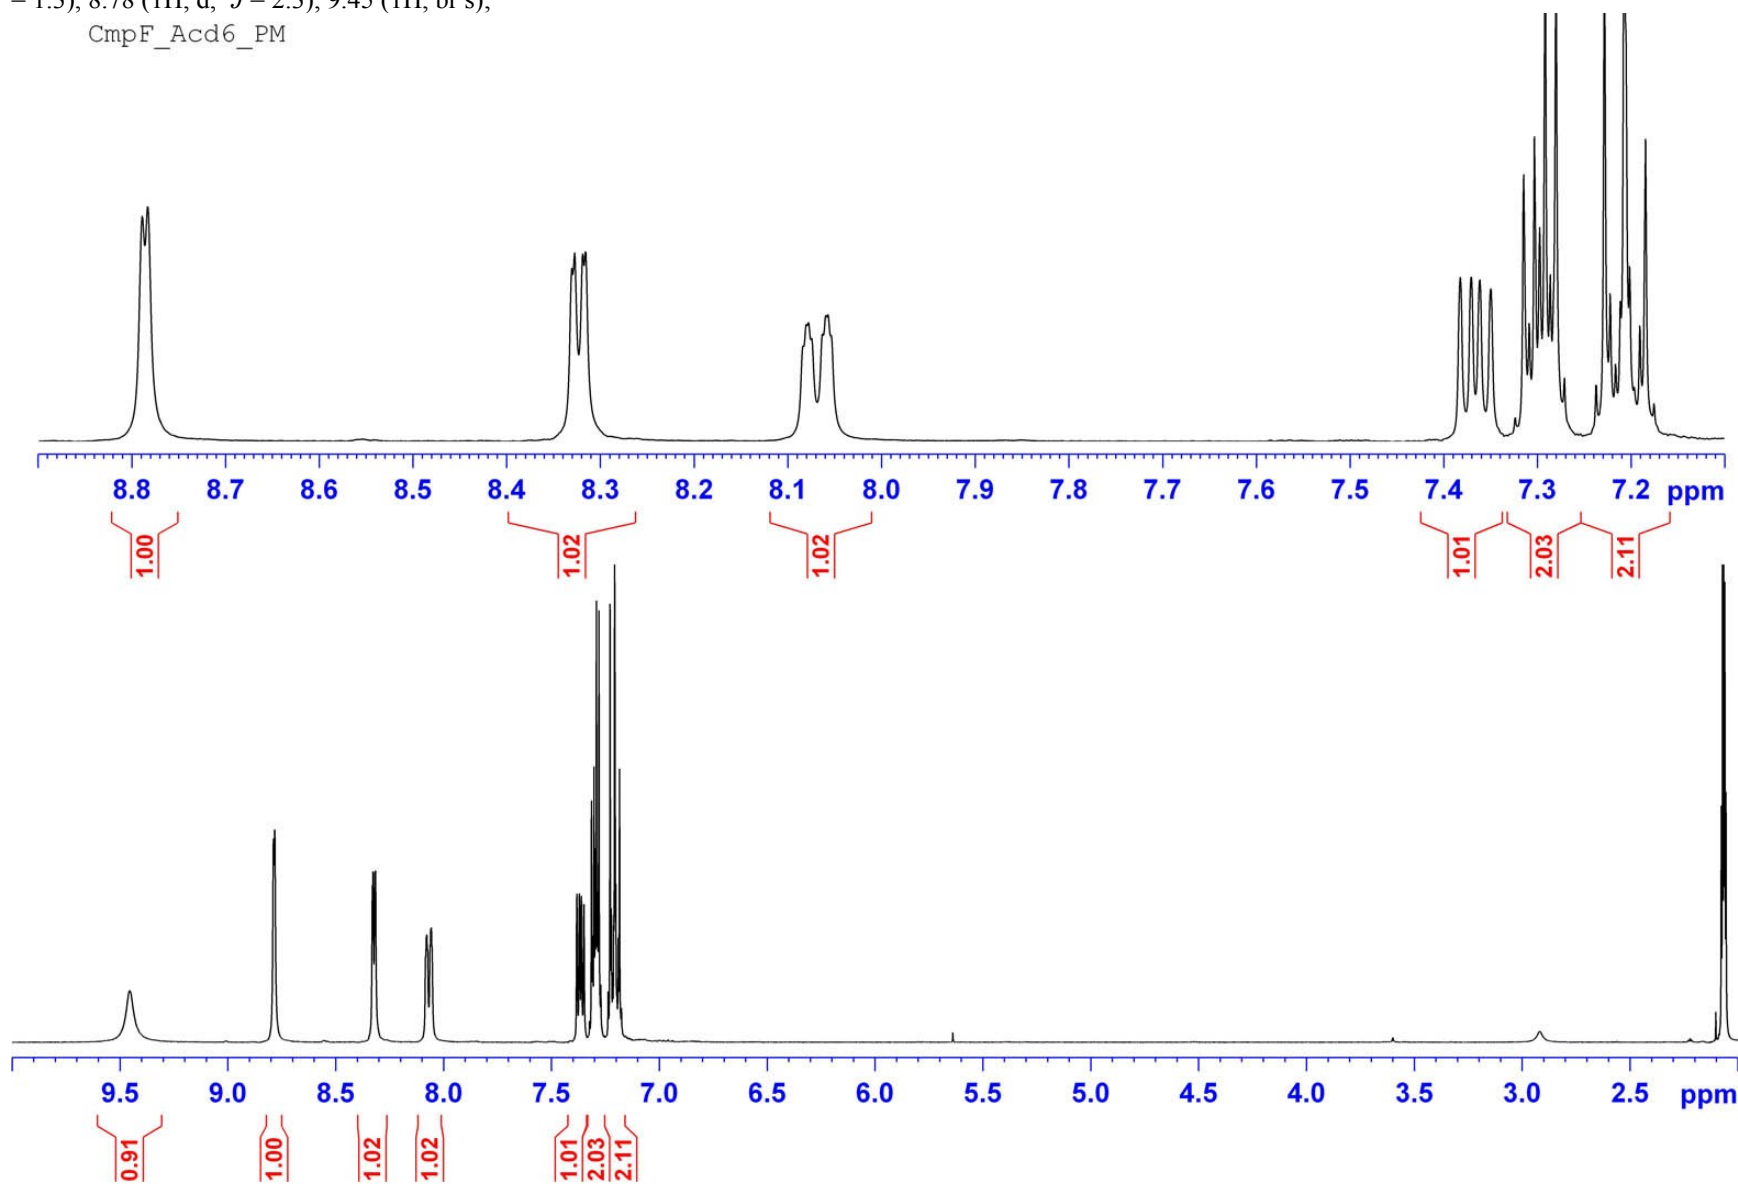

1.1.1.8. **CmpF** (CDCl<sub>3</sub>) δ 7.11 (2H, m), 7.18 (2H, m), 7.35 (1H, dd, <sup>3</sup>J = 8.5, <sup>4</sup>J = 4.8), 7.82, (1H, br s), 8.14 (1H, d, <sup>3</sup>J = 7.2), 8.41 (1H, d, <sup>3</sup>J = 4.4), 8.64 (1H, d, <sup>3</sup>J = 1.6);

CmpF\_CDC13\_PM

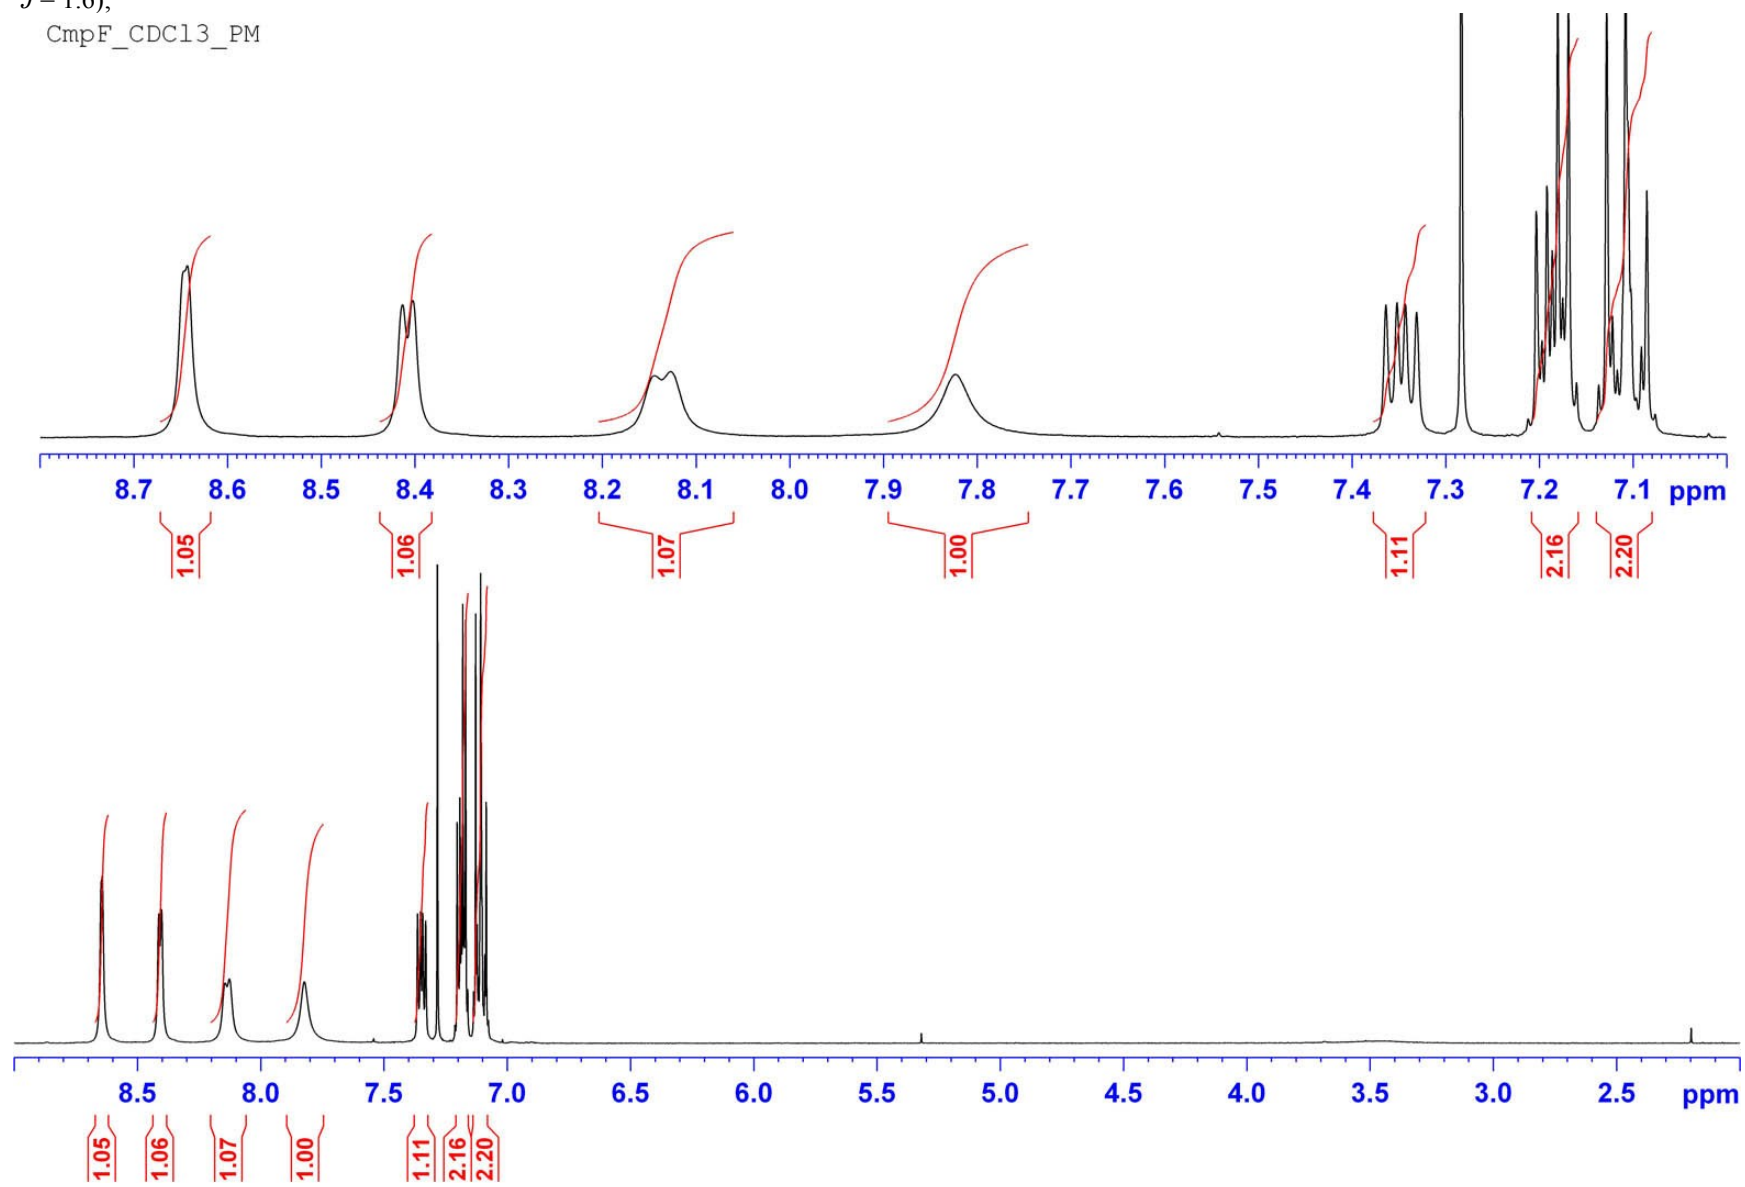

1.1.1.9. **CmmF** (Acetone- $d_6$ ):  $\delta$  7.08 (1H, tdd,  $^3J=8.5$ ,  $^4J=2.5$   $^5J=0.9$ ), 7.13 (2H, m), 7.38 (1H, dd,  $^3J=8.4$ ,  $^4J=4.8$ ), 7.48 (1H, dd,  $^3J=8.5$ ,  $^4J=6.4$ ), 8.07 (1H, d,  $^3J=8.1$ ), 8.33 (1H, dd,  $^3J=8.4$ ,  $^4J=1.2$ ), 8.79 (1H, d,  $^3J=2.2$ ), 9.52 (1H, br s);

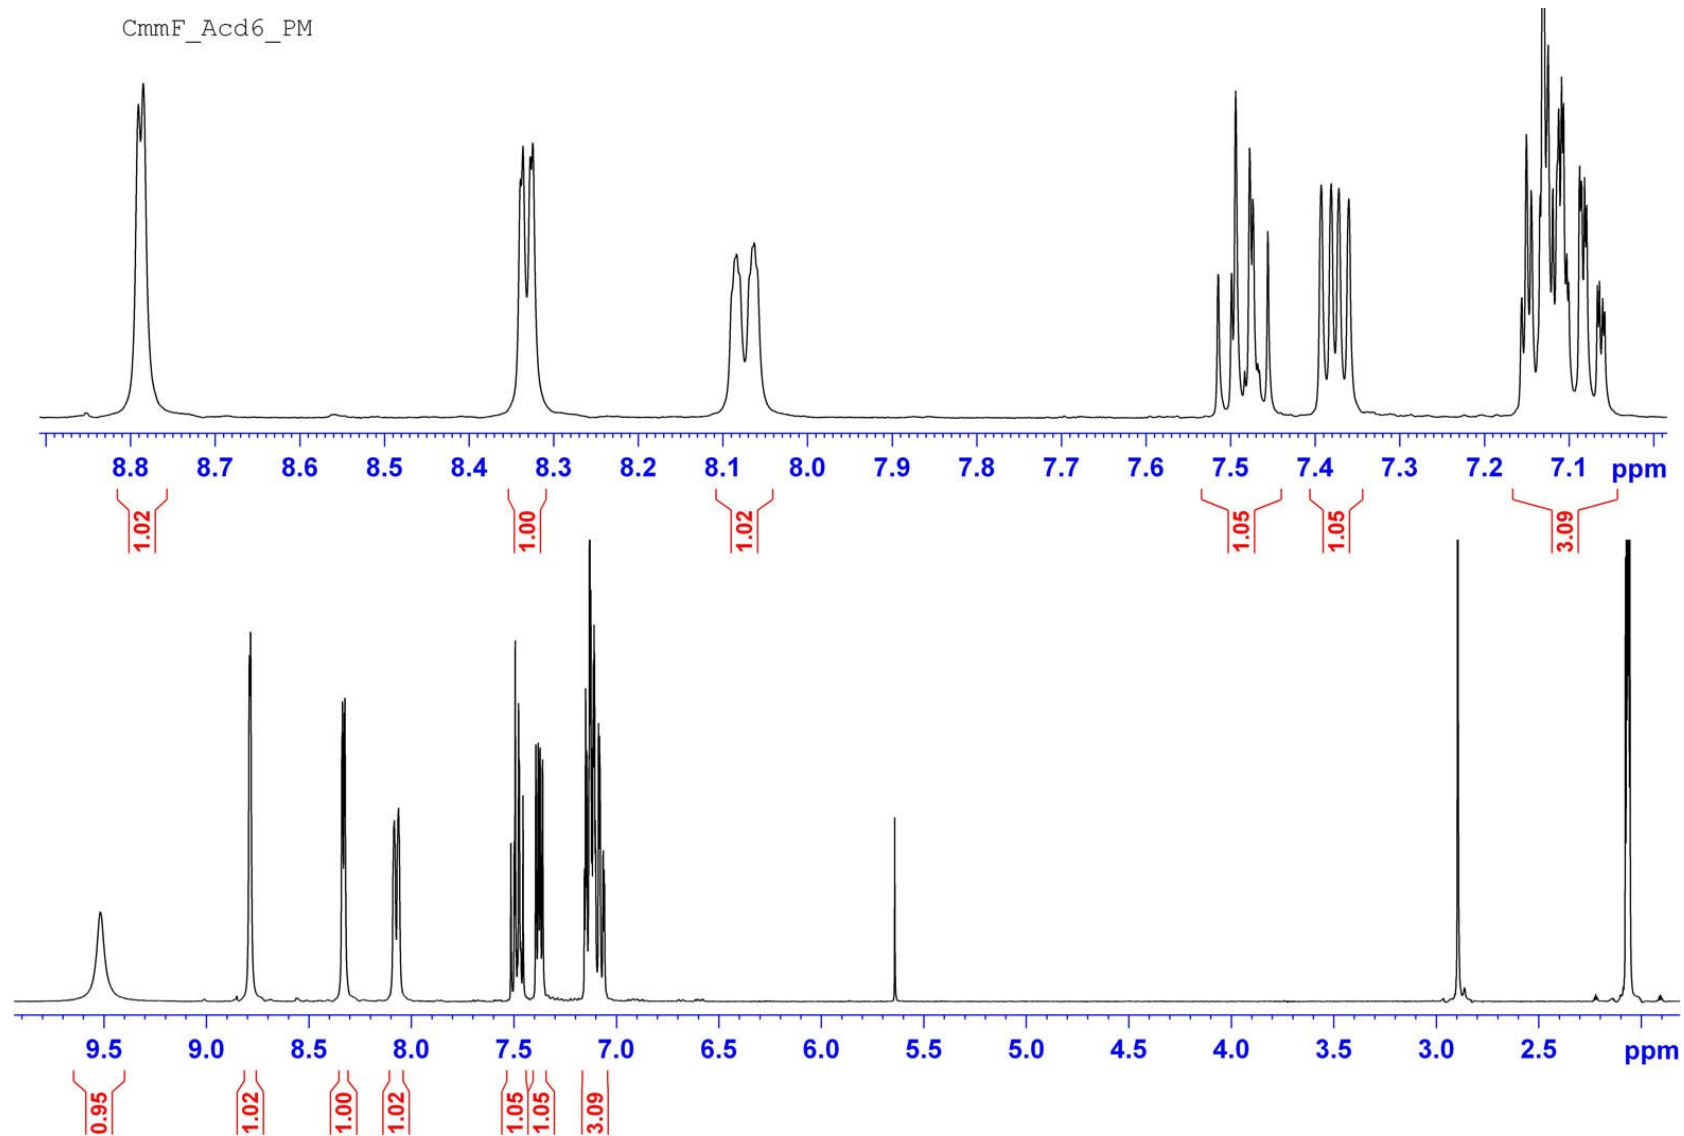

1.1.1.10. **CmmF** (CDCl<sub>3</sub>) δ 6.99 (2H, m), 7.04 (1H, d, <sup>3</sup>J = 8.1), 7.38 (2H, m), 8.10 (1H, br s), 8.18 (1H, d, <sup>3</sup>J = 7.0), 8.41 (1H, d, <sup>3</sup>J = 4.3), 8.68 (1H, s);  
CmmF\_CDC13\_PM

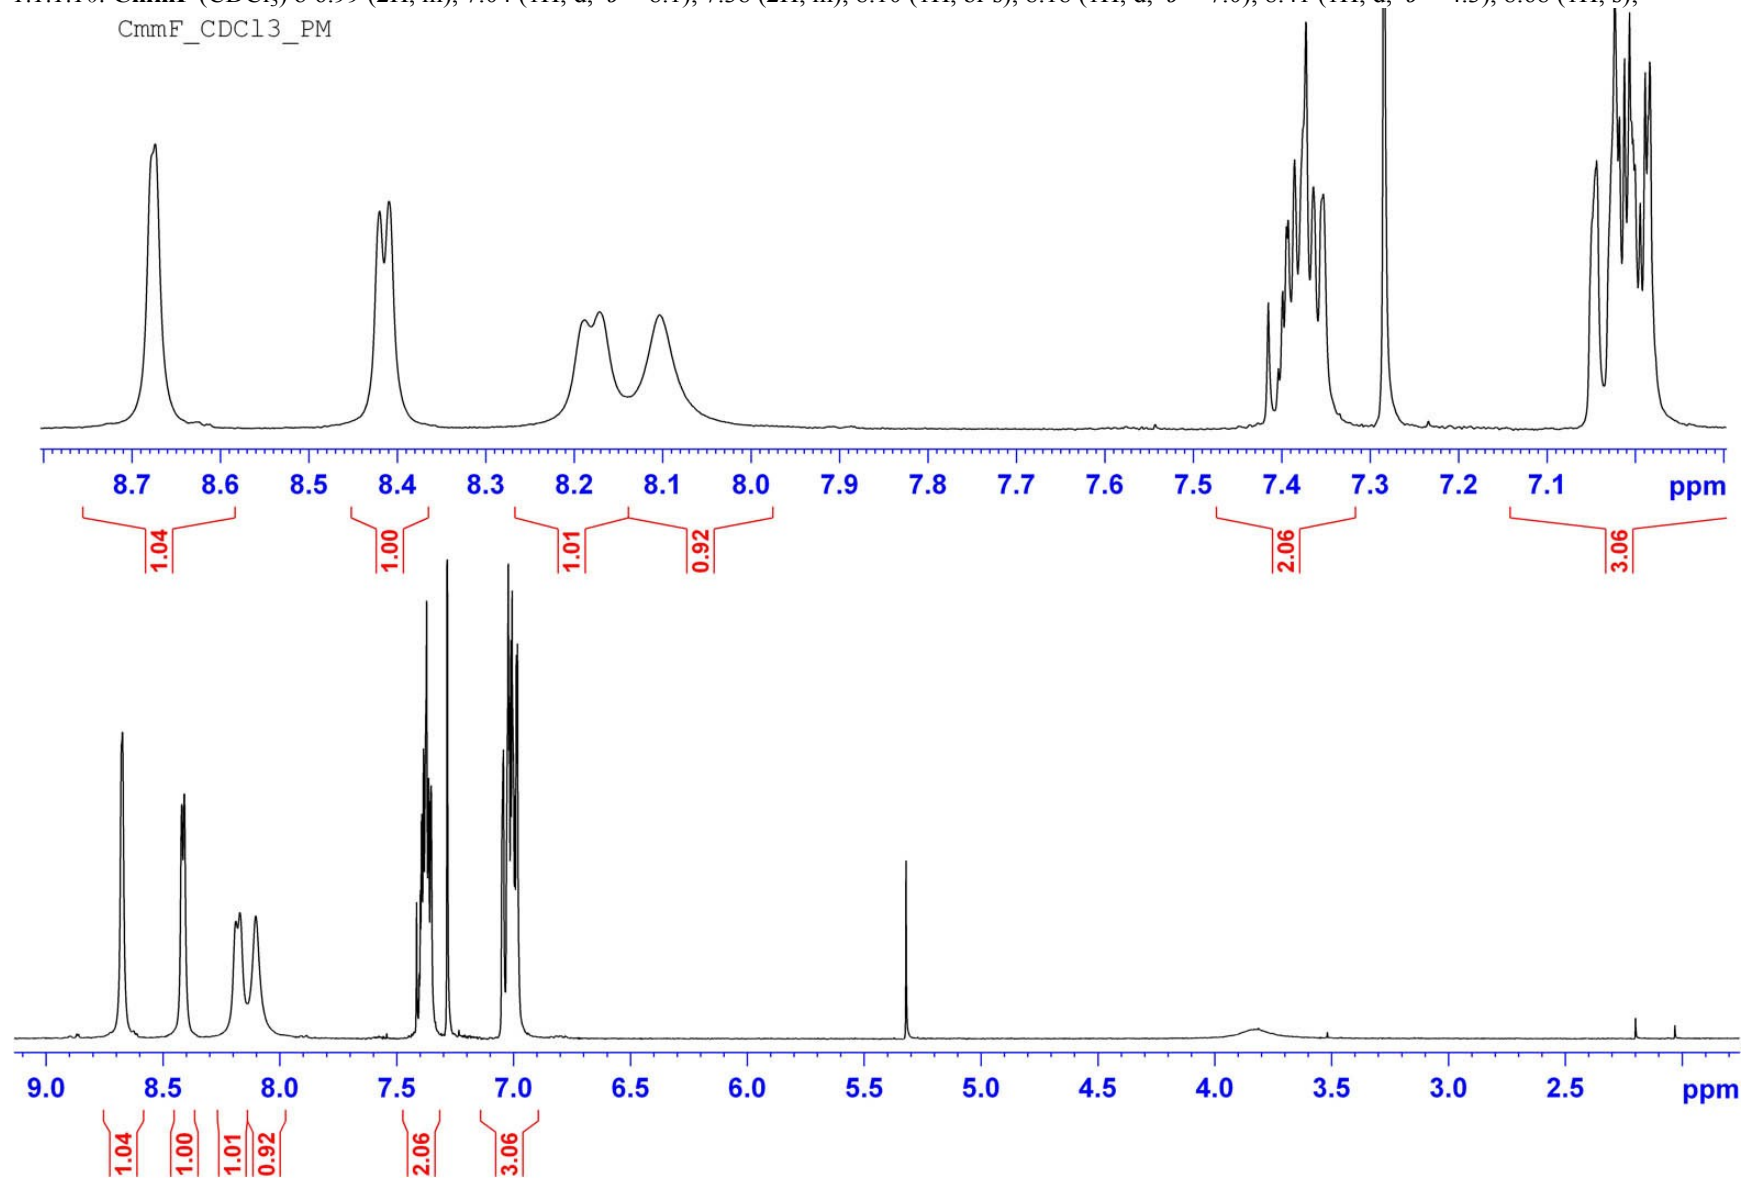



1.1.1.11. **CmoF** (Acetone-d<sub>6</sub>):  $\delta$  7.32 (5H, m), 8.08 (1H, d,  $^4J = 7.8$ ), 8.34 (1H, s), 8.8 (1H, s), 9.64 (1H, br s);  
CmoF\_Acd6\_PM

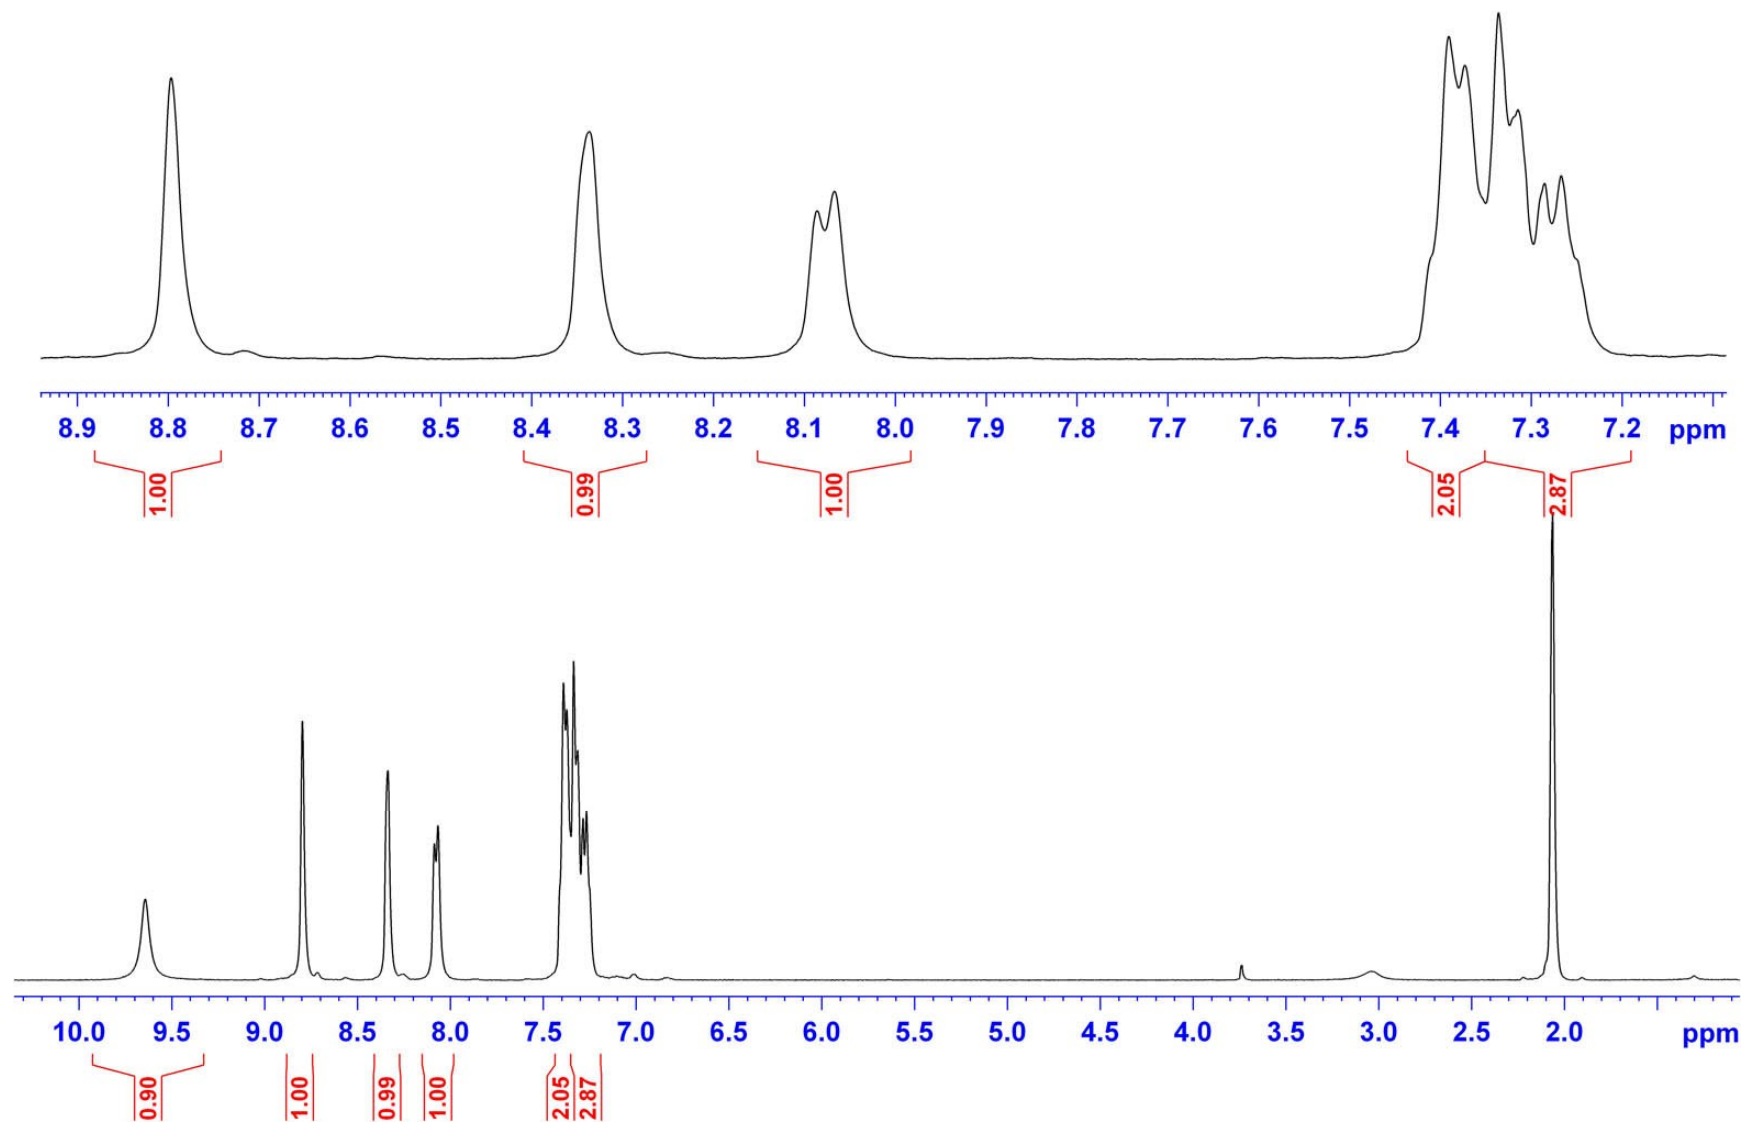

1.1.1.12. **CmoF** (CDCl<sub>3</sub>) δ 7.22 (4H, m; including residual CHCl<sub>3</sub> solvent), 7.35 (1H, dd, <sup>3</sup>J = 8.5, <sup>4</sup>J = 4.7), 8.18 (1h, d, <sup>3</sup>J = 7.2), 8.26 (1H, br s), 8.41 (1H, d, <sup>3</sup>J = 4.2), 8.67 (1H, br s);

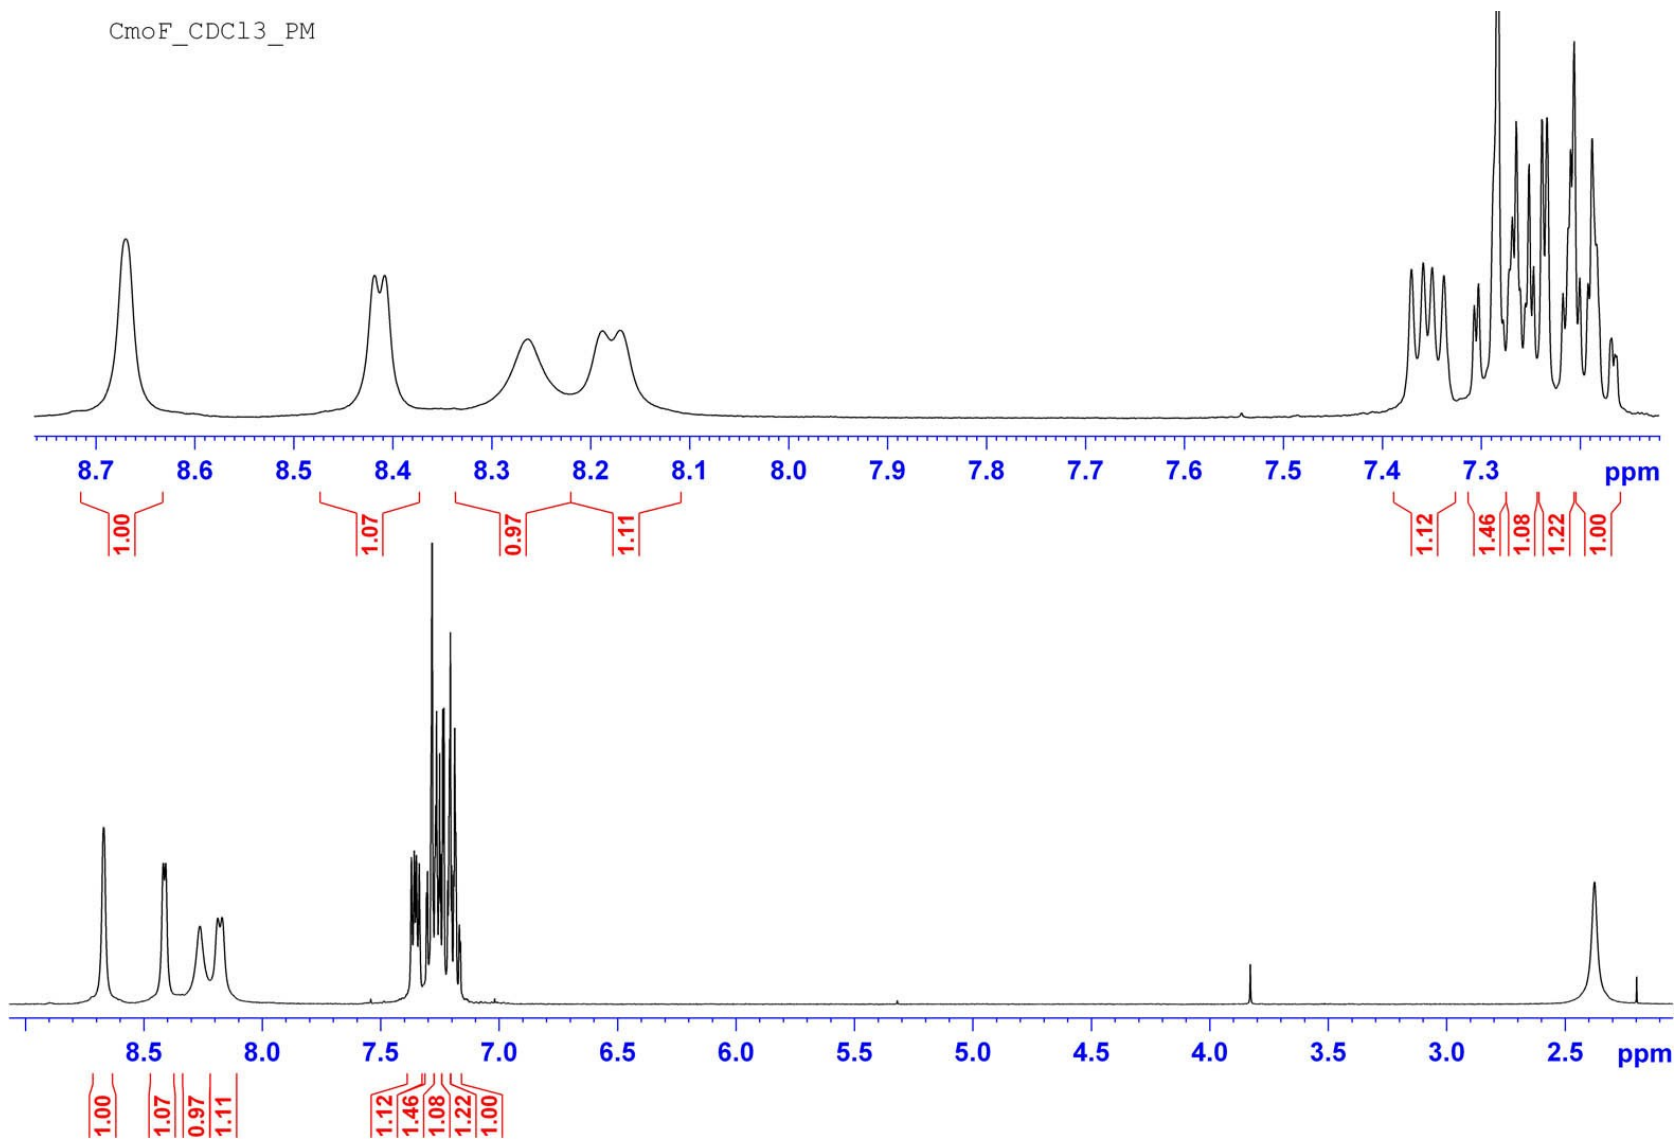

1.1.1.13. **CopF** (Acetone-d<sub>6</sub>):  $\delta$  7.12 (1H, ddd,  $^3J=7.7$ ,  $^4J=4.9$ ,  $^5J=1.0$ ), 7.22 (2H, tt,  $^3J=8.8$ ,  $^4J=2.4$ ), 7.32 (2H, m), 7.82 (1H, ddd,  $^3J=8.4$ ,  $^4J=7.3$ ,  $^5J=2$ ), 7.98 (1H dt,  $^3J=8.5$ ,  $^4J=0.9$ ), 8.35 (1H, ddd,  $^3J=4.9$ ,  $^4J=1.9$ ,  $^5J=0.8$ ), 9.75 (1H, br s);

CopF\_HNMR\_Acd6

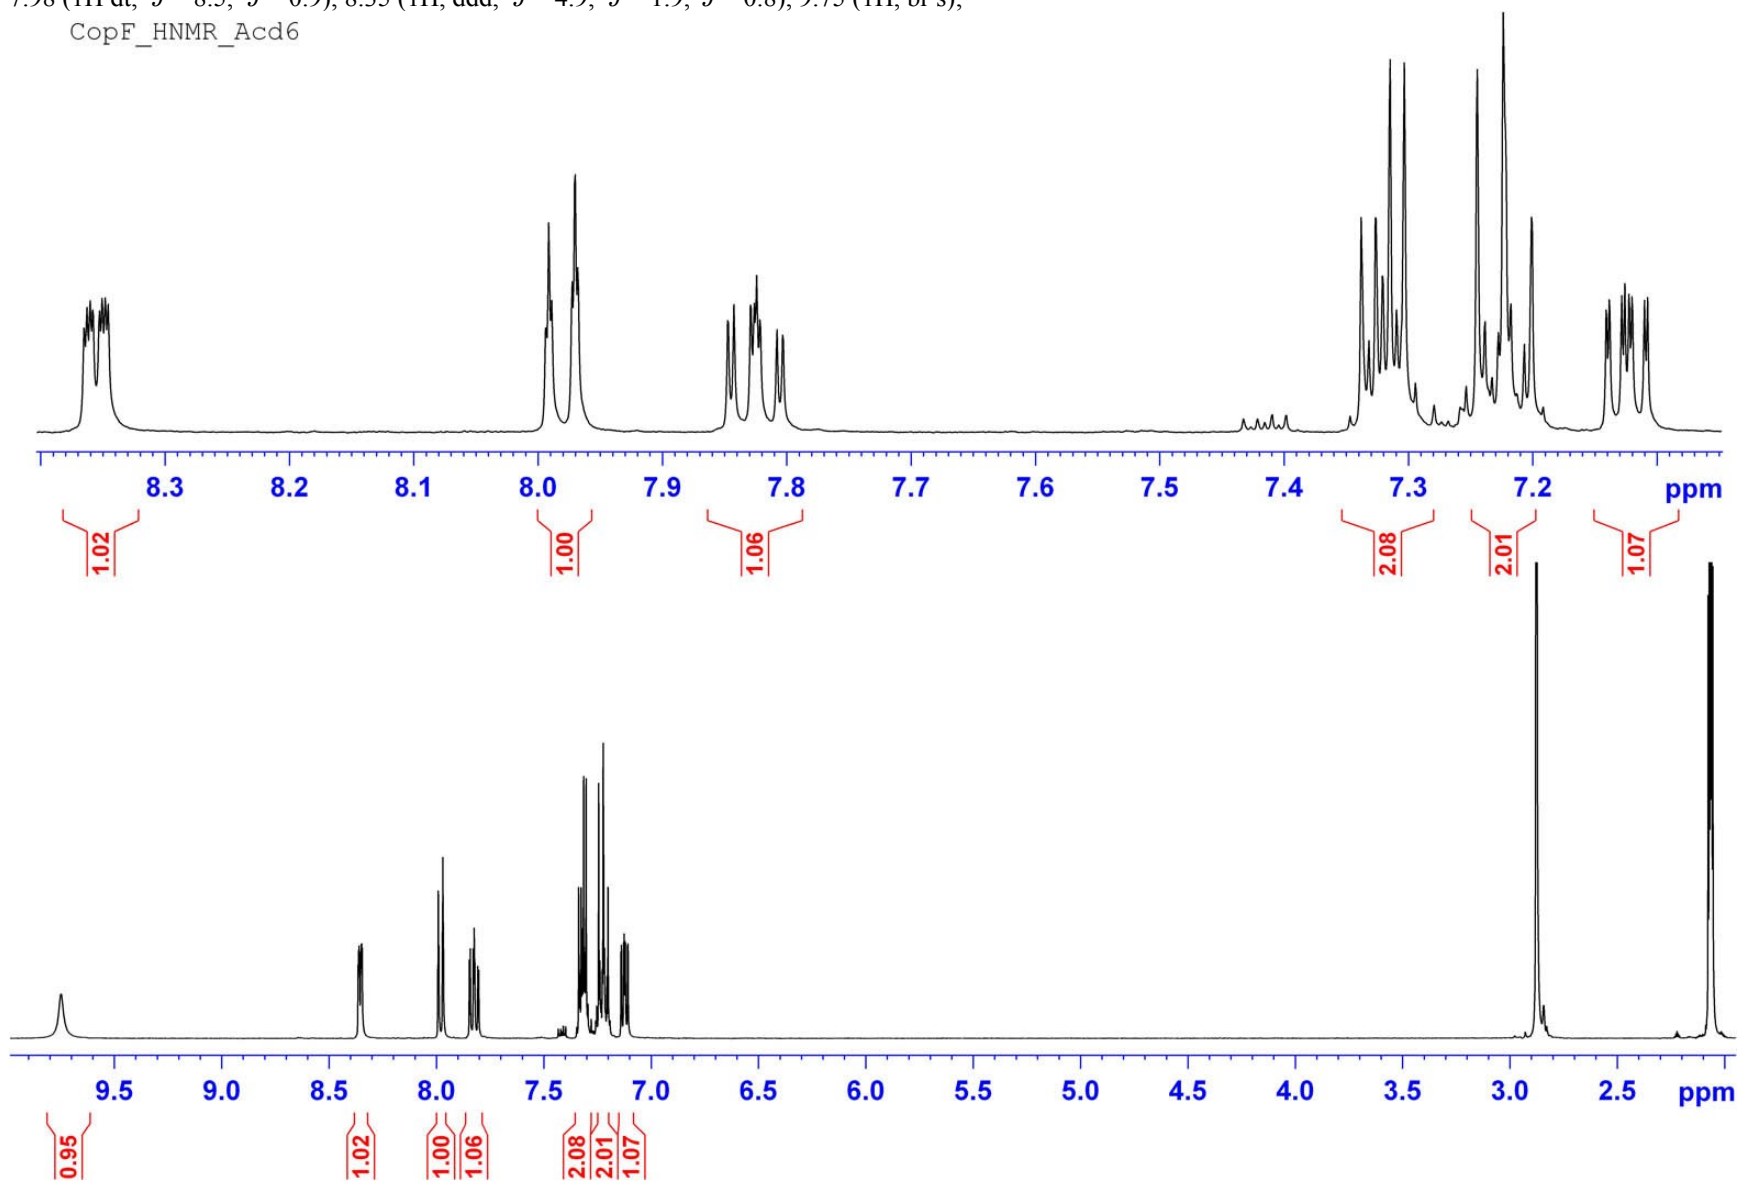

1.1.1.14. **CopF** (CDCl<sub>3</sub>) δ 6.90 (1H, dd, <sup>3</sup>J = 7.5, <sup>4</sup>J = 5.4), 6.95, (2H, t, <sup>3</sup>J = 8.5), 7.03 (2H, m), 7.60 (1H, td, <sup>3</sup>J = 7.8, <sup>4</sup>J = 1.5), 7.90 (1H, d, <sup>3</sup>J = 8.5), 8.23 (1H, d, <sup>3</sup>J = 4.3), 9.47 (1H, br s);

CopF\_HNMR\_CDC13

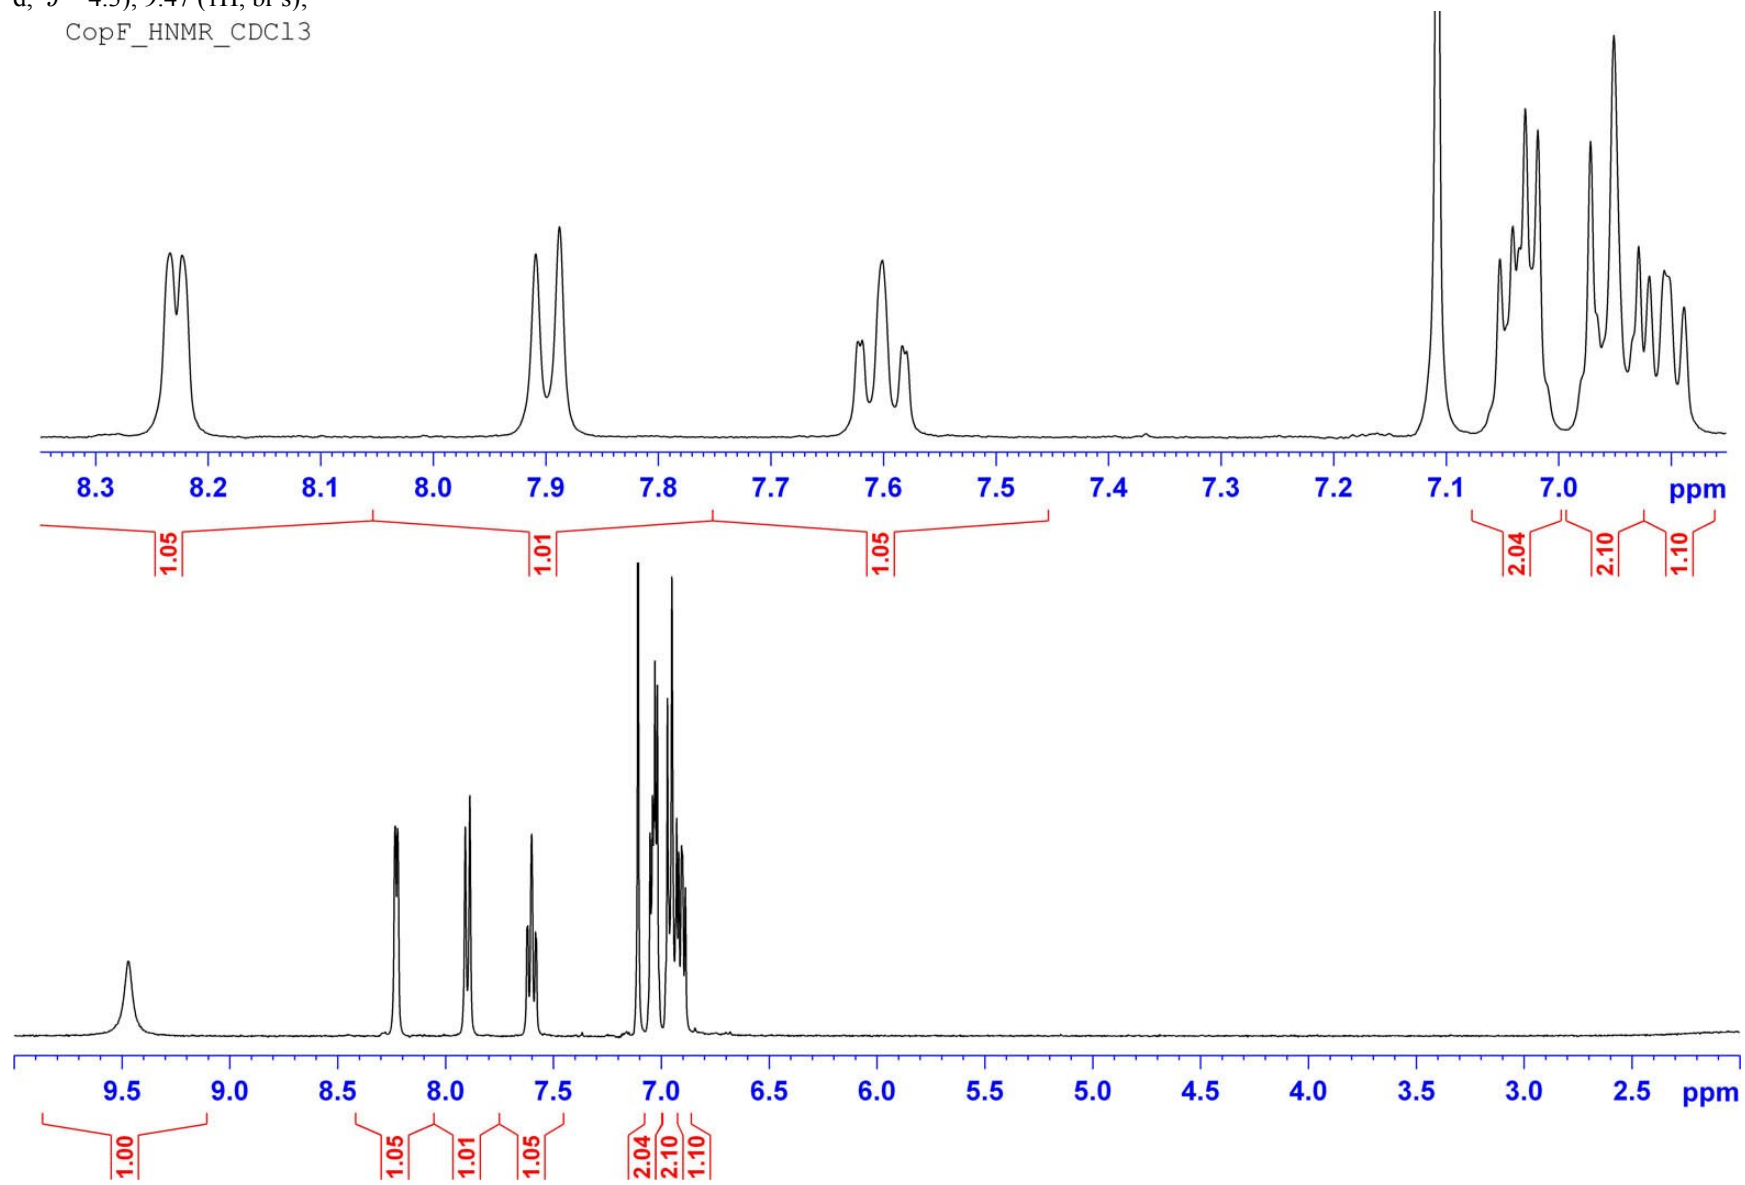

**1.1.2. <sup>13</sup>C NMR data and spectra (400 MHz, Acetone-d<sub>6</sub>)**

1.1.2.1. CppF: δ 113.46, 116.60/116.83, 124.43/124.51, 146.61, 147.67, 151.46, 152.34, 159.85, 162.26;

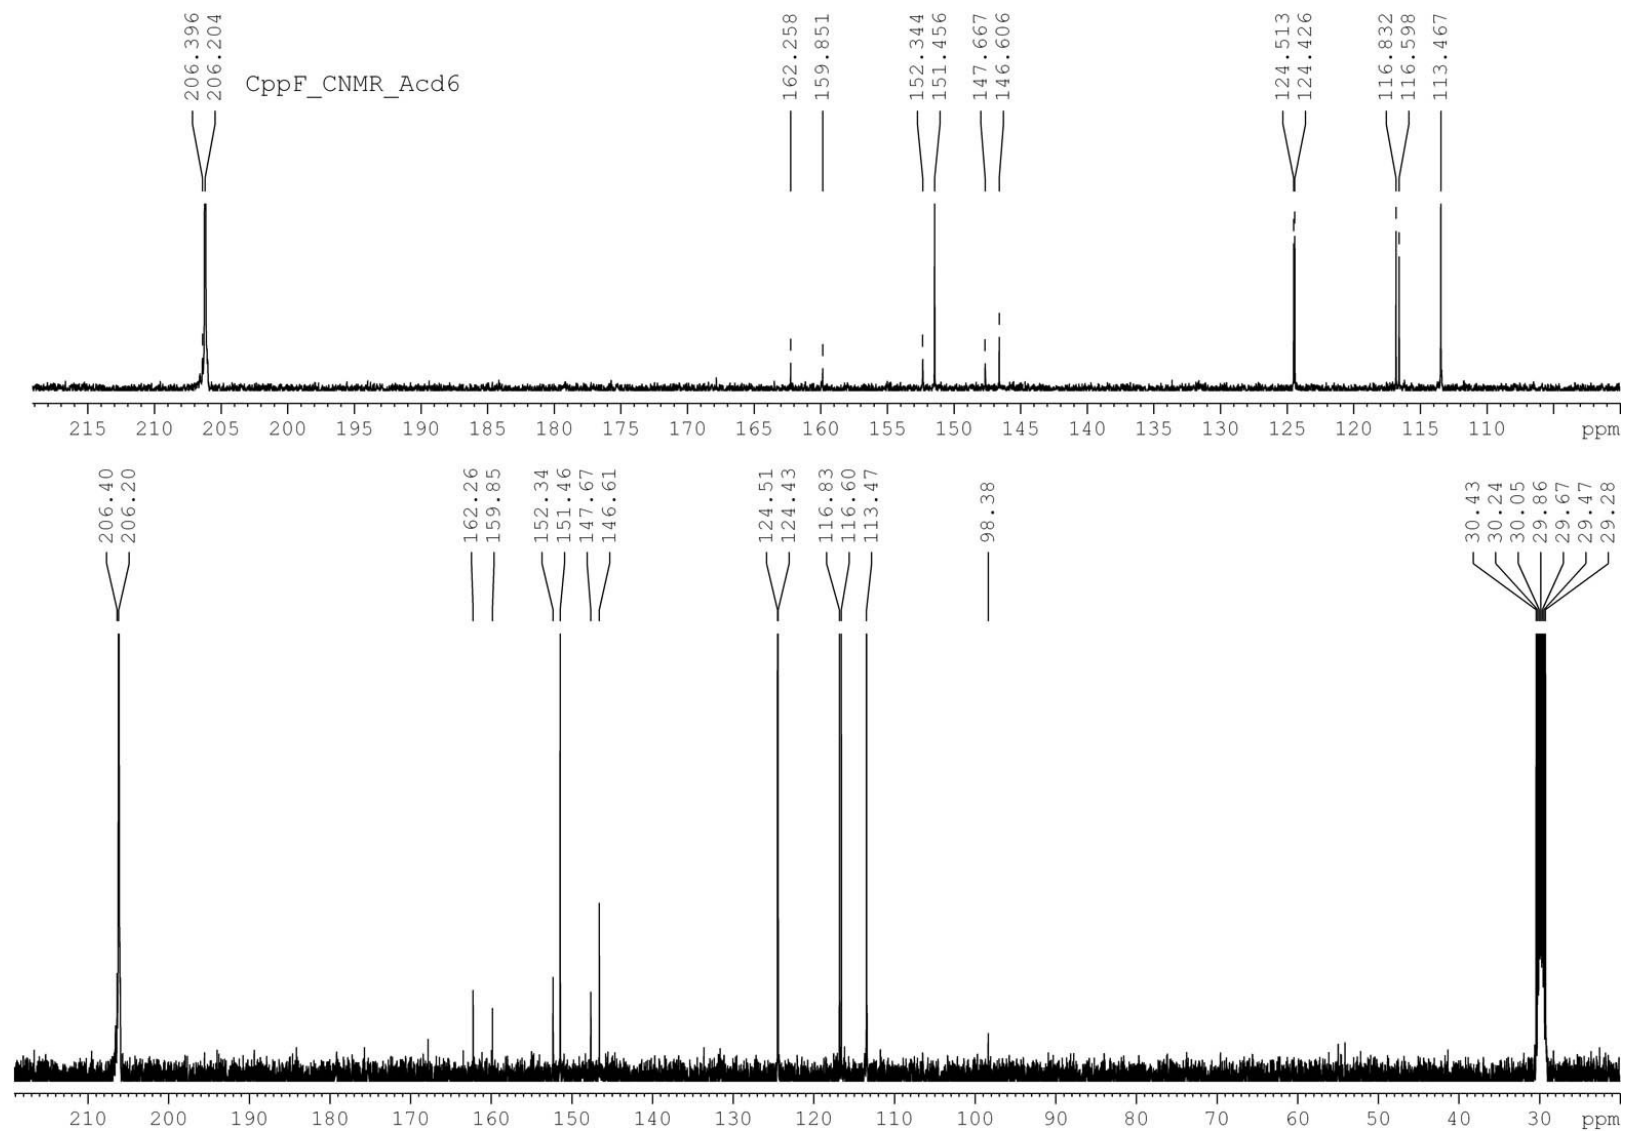

1.1.2.2. **CpmF**:  $\delta$  110.48/110.72, 113.30/113.51, 118.77/118.80, 131.37/131.47, 146.49, 151.48, 151.86, 152.64, 162.45, 164.88;

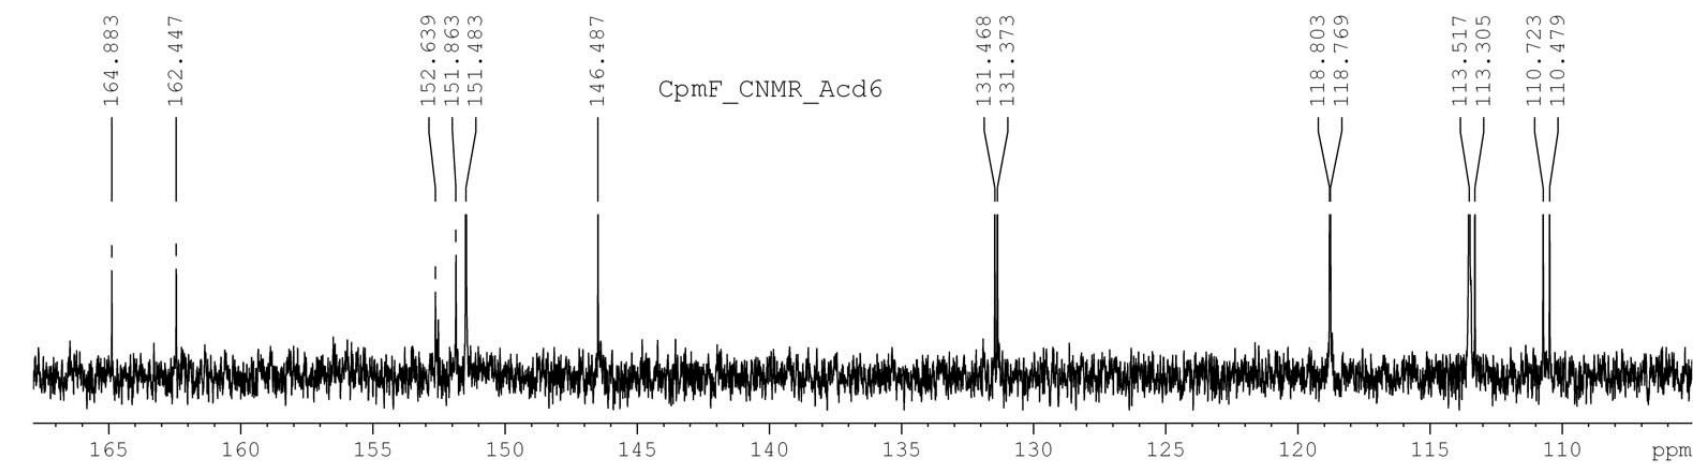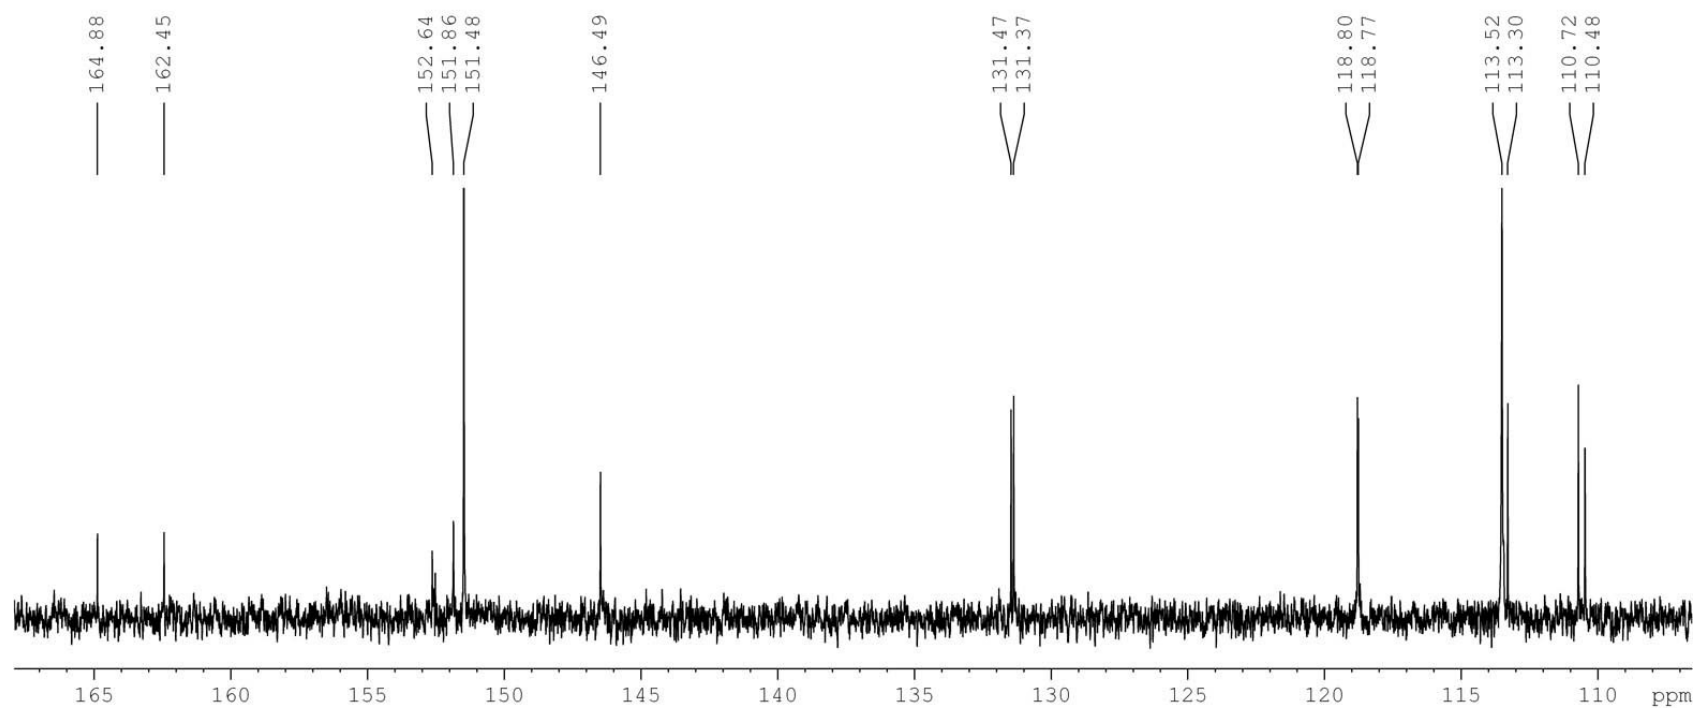

1.1.2.3. **CpoF**:  $\delta$  117.31, 117.50, 125.35, 125.67/125.71, 128.27/128.35, 138.78/138.90, 146.40, 151.38/151.52, 154.75, 156.73;

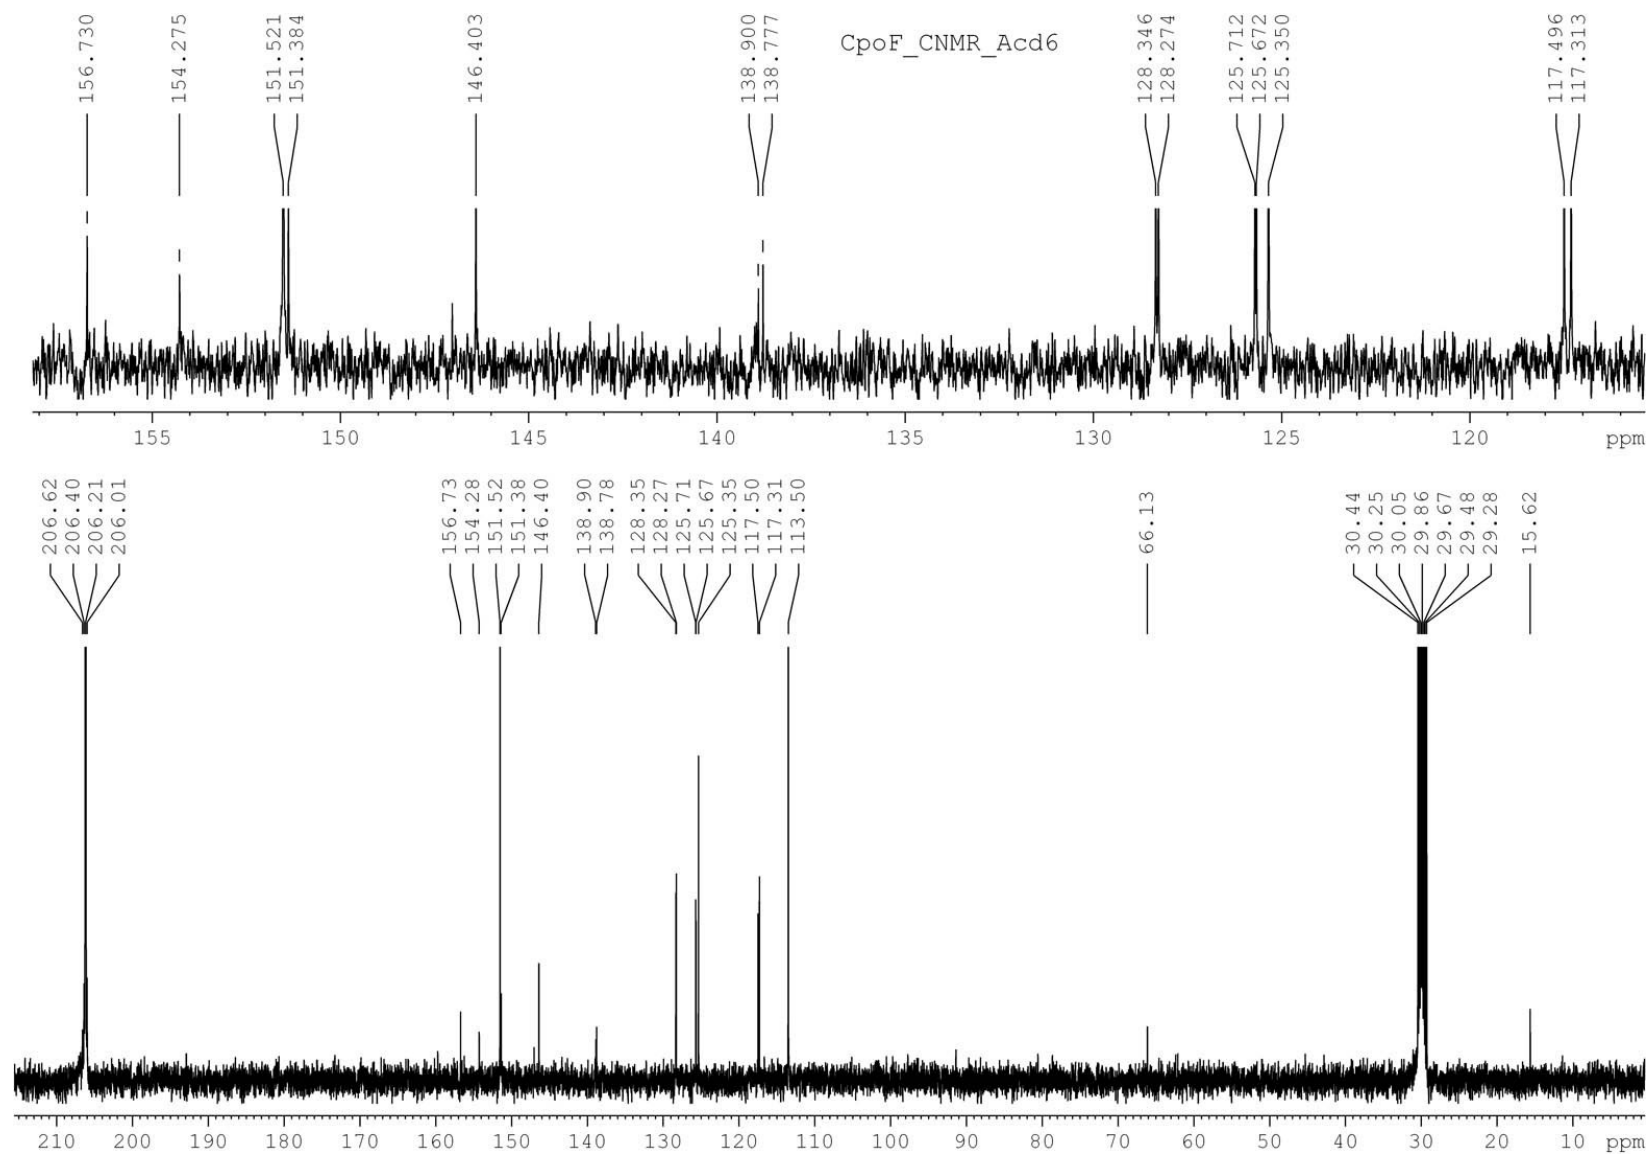

1.1.2.4. **CmpF**:  $\delta$  116.53/116.77, 124.40/124.50, 126.12, 136.39, 141.50, 145.30, 147.86, 152.78, 159.76, 162.16;

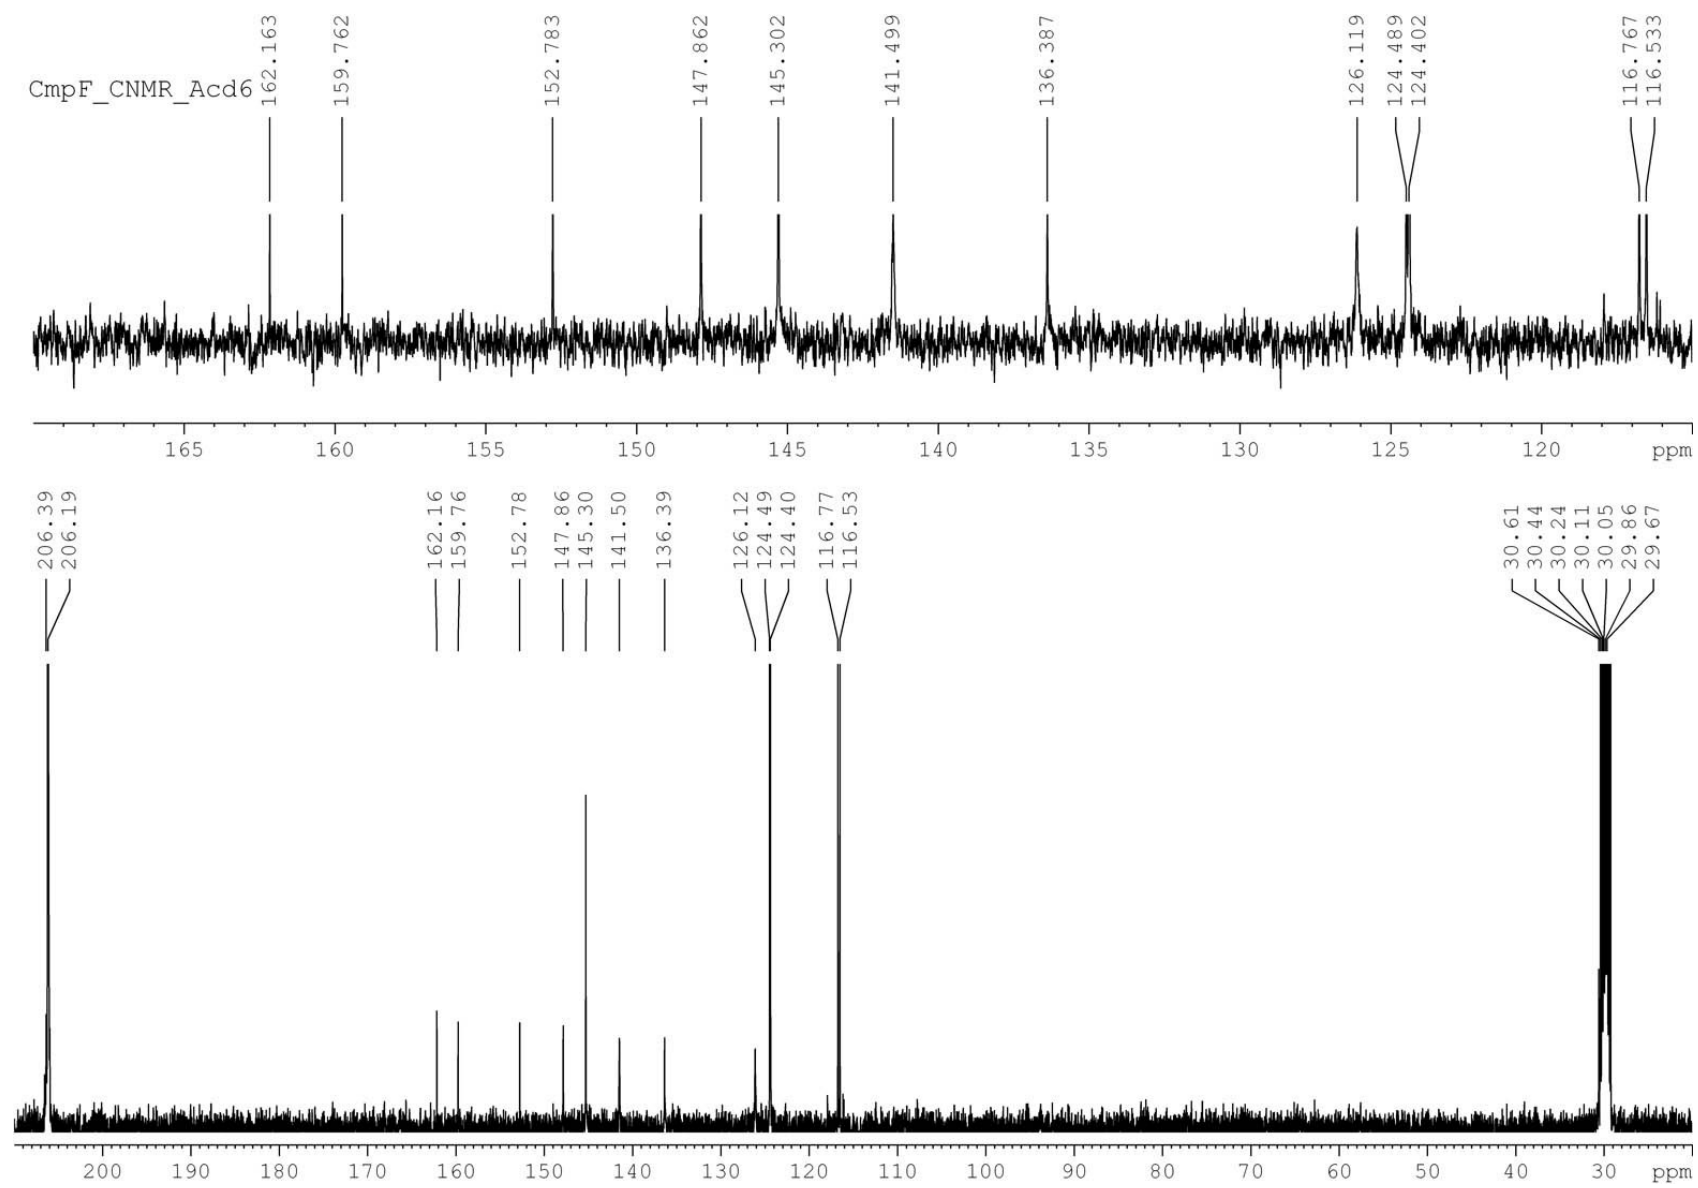



1.1.2.5. **CmmF**:  $\delta$  110.44/110.68, 113.11/113.32, 118.74/118.77, 124.42, 126.20, 131.31/131.40, 136.27, 141.55, 145.41, 152.30, 152.77/152.89, 162.45/164.88;

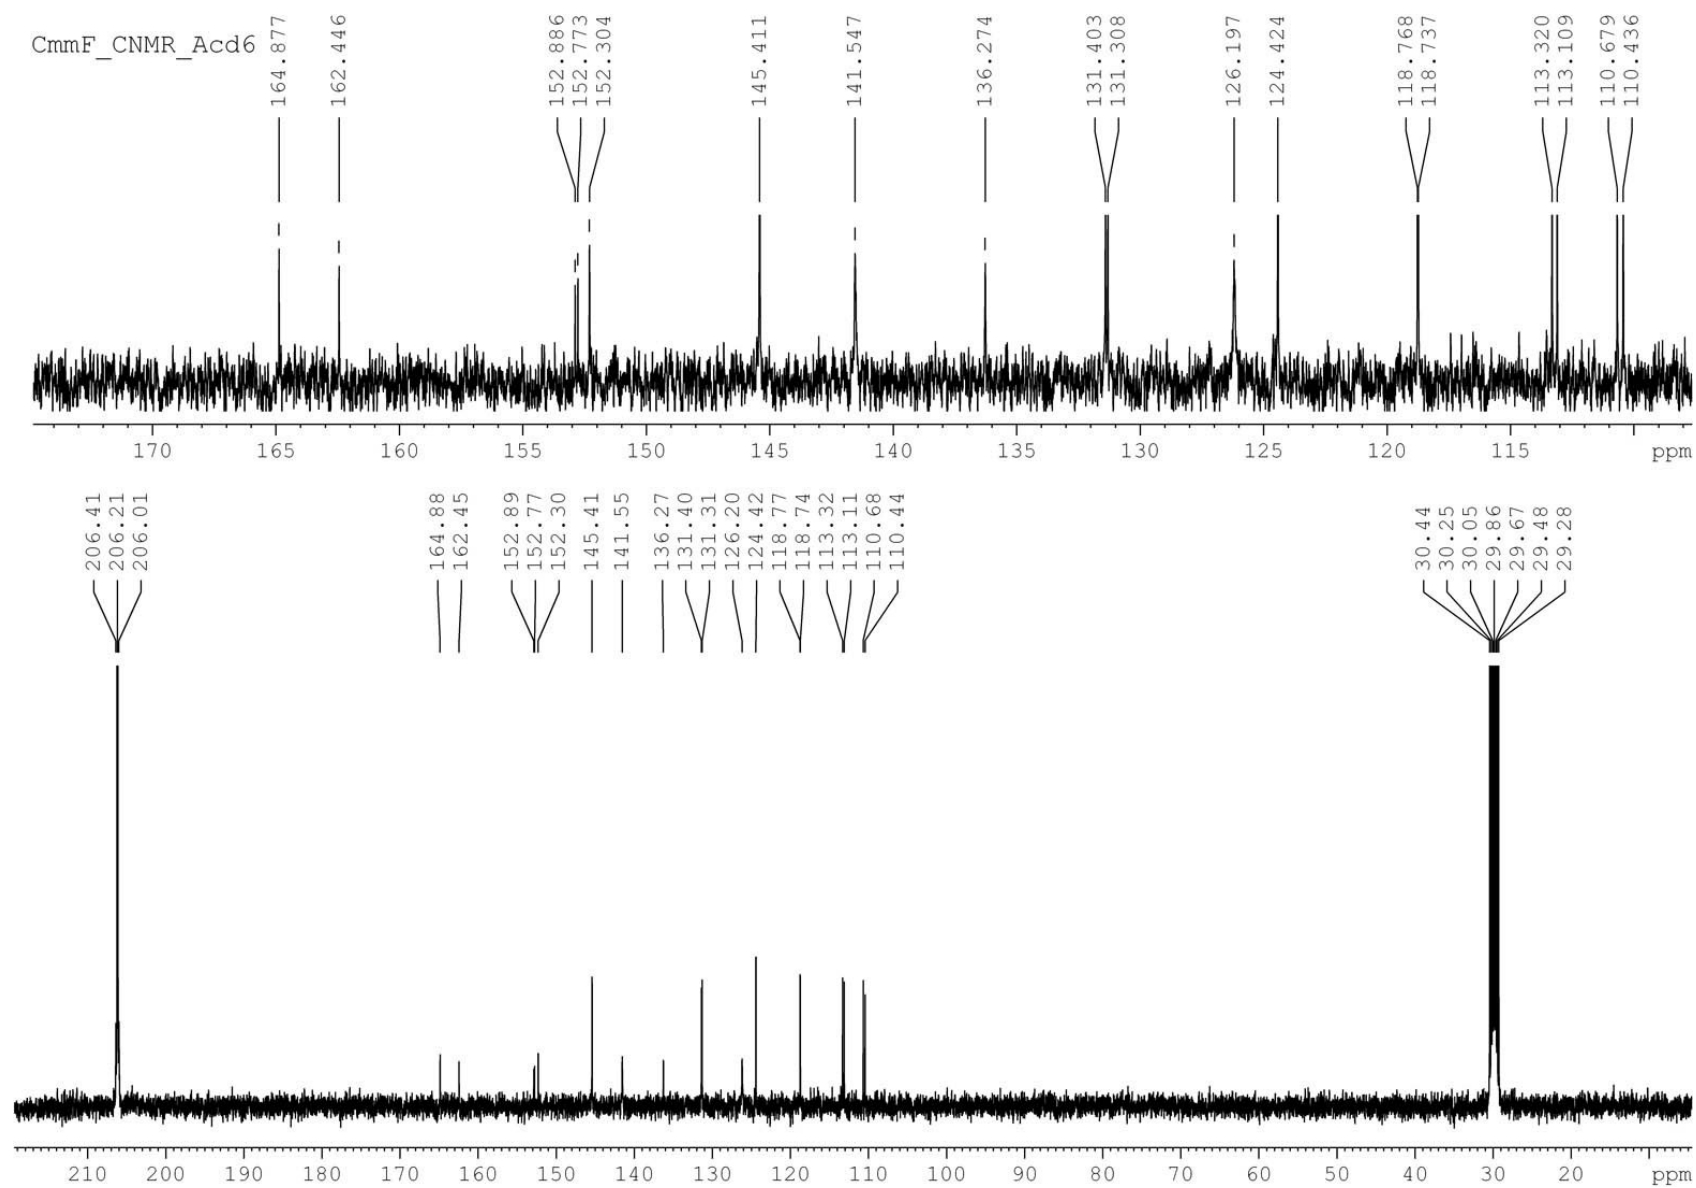

1.1.2.6. **CmoF**:  $\delta$  117.27/117.46, 124.46, 125.40/125.61/125.65, 126.17, 128.10/128.17, 136.21, 139.00/139.12, 141.47, 145.48, 151.85, 154.35, 156.80;

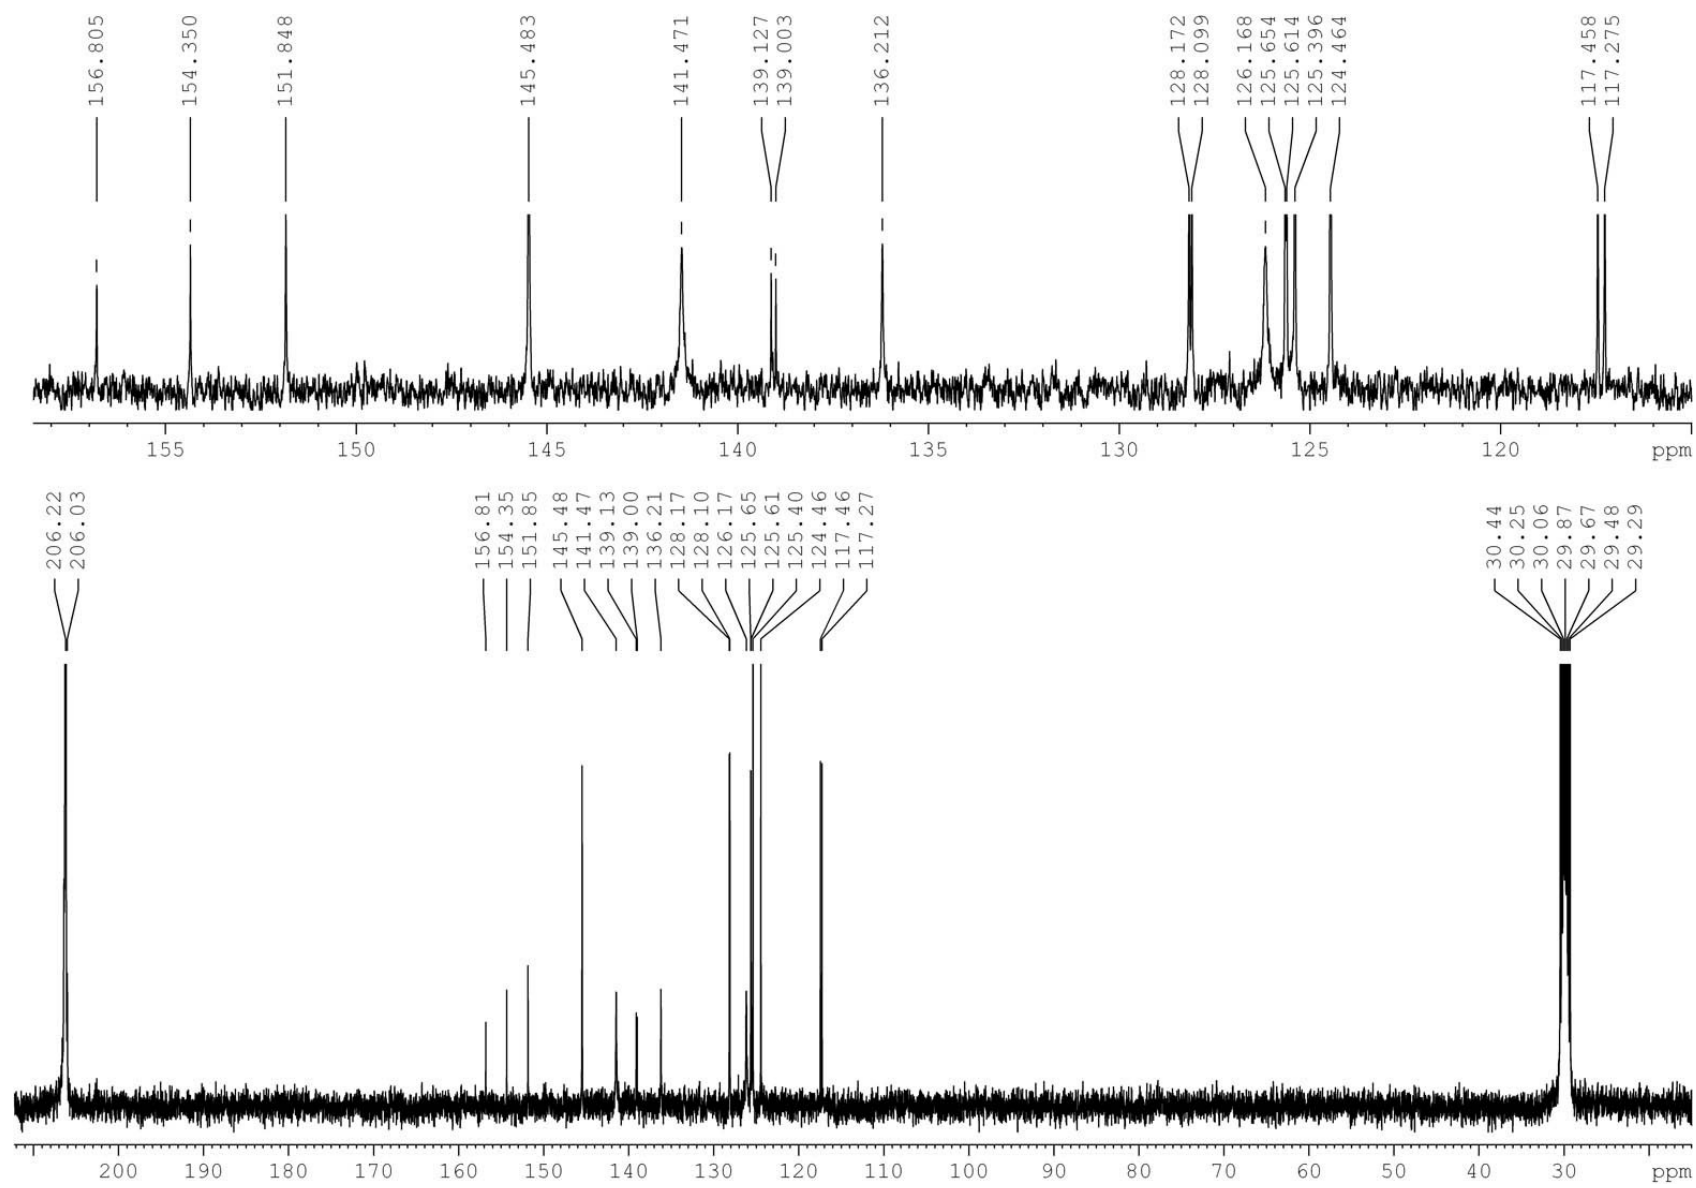

1.1.2.7. **CopF**:  $\delta$  113.18, 116.55, 116.78, 120.04, 124.51, 124.59, 139.11, 149.03, 152.90, 162.20;

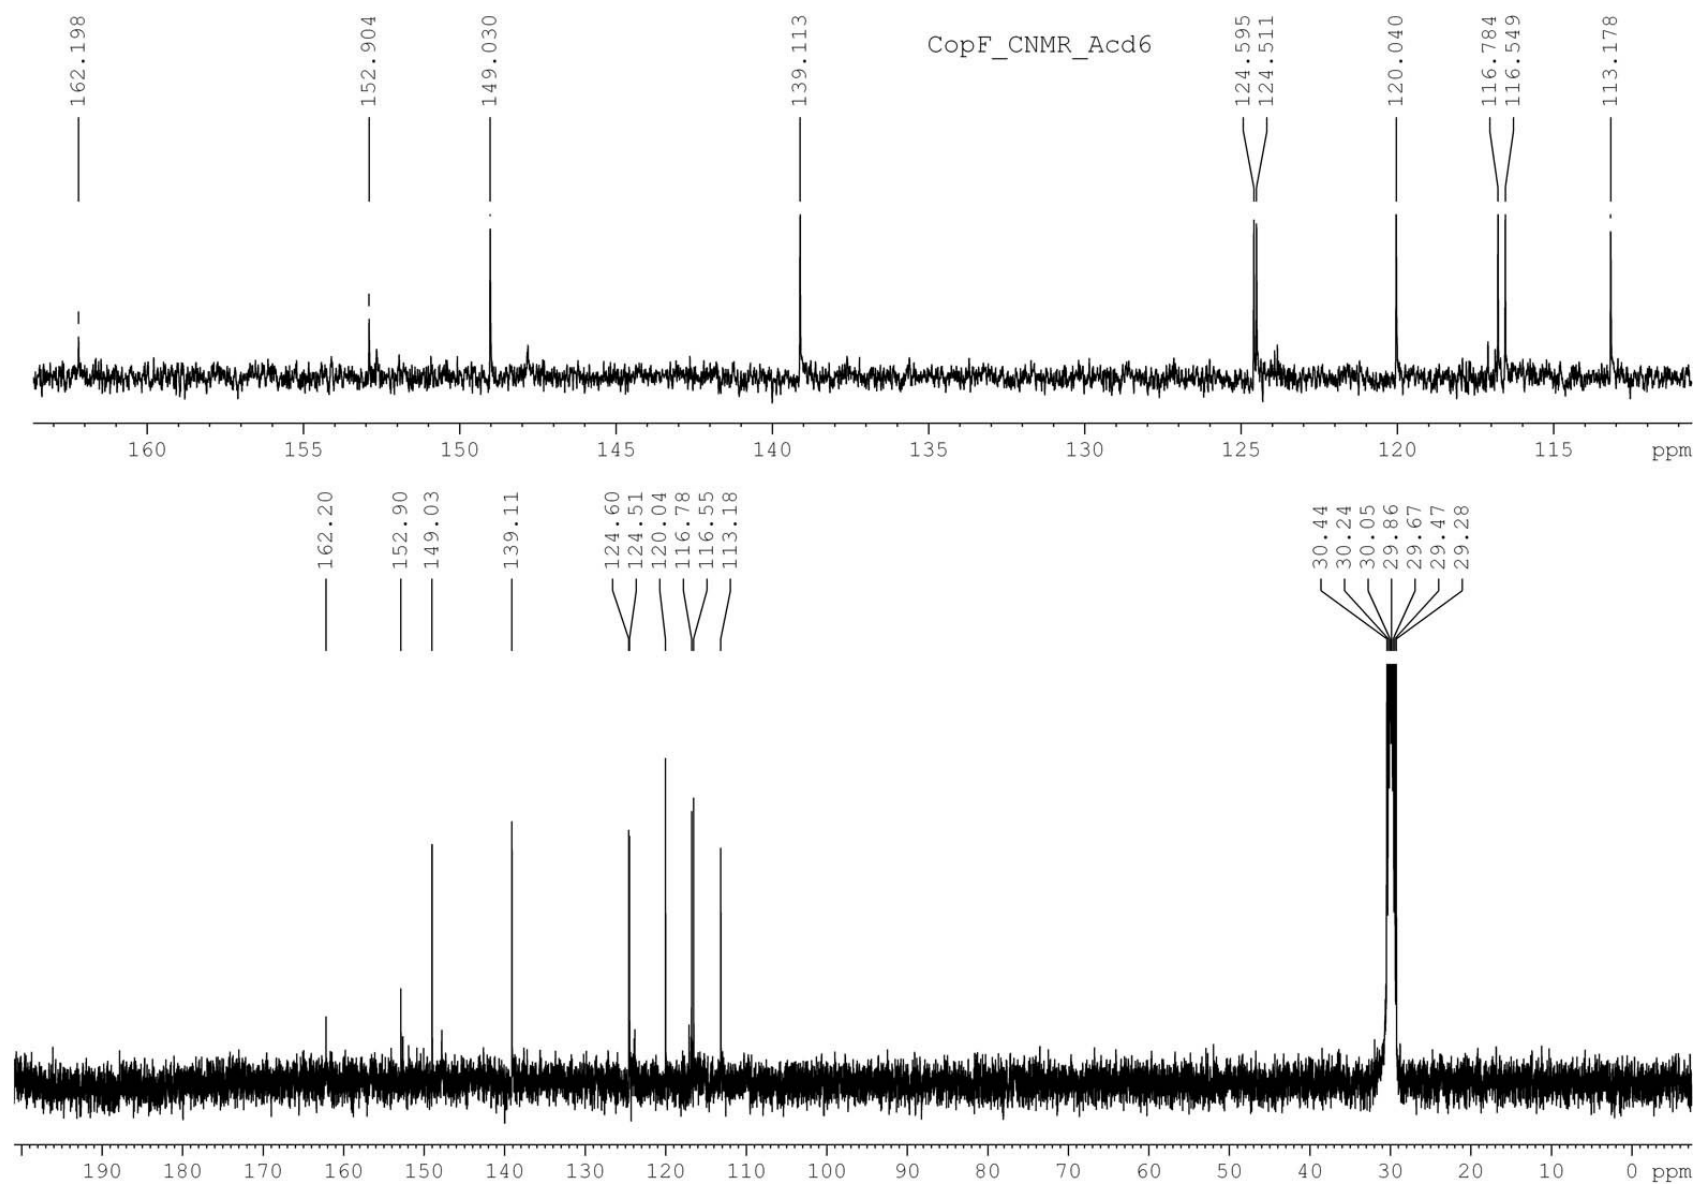

**1.1.3.  $^{19}\text{F}$  NMR data and spectra (400 MHz, Acetone- $d_6$ )**

1.1.3.1. **CppF**:  $\delta$  58.59 (1F, m).

CppF\_FNMR\_Acd6

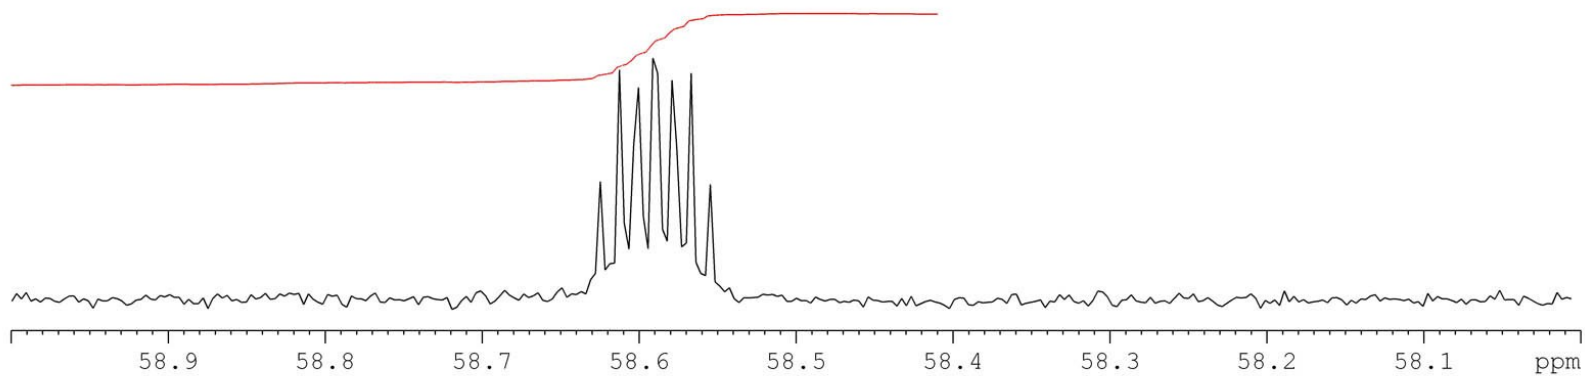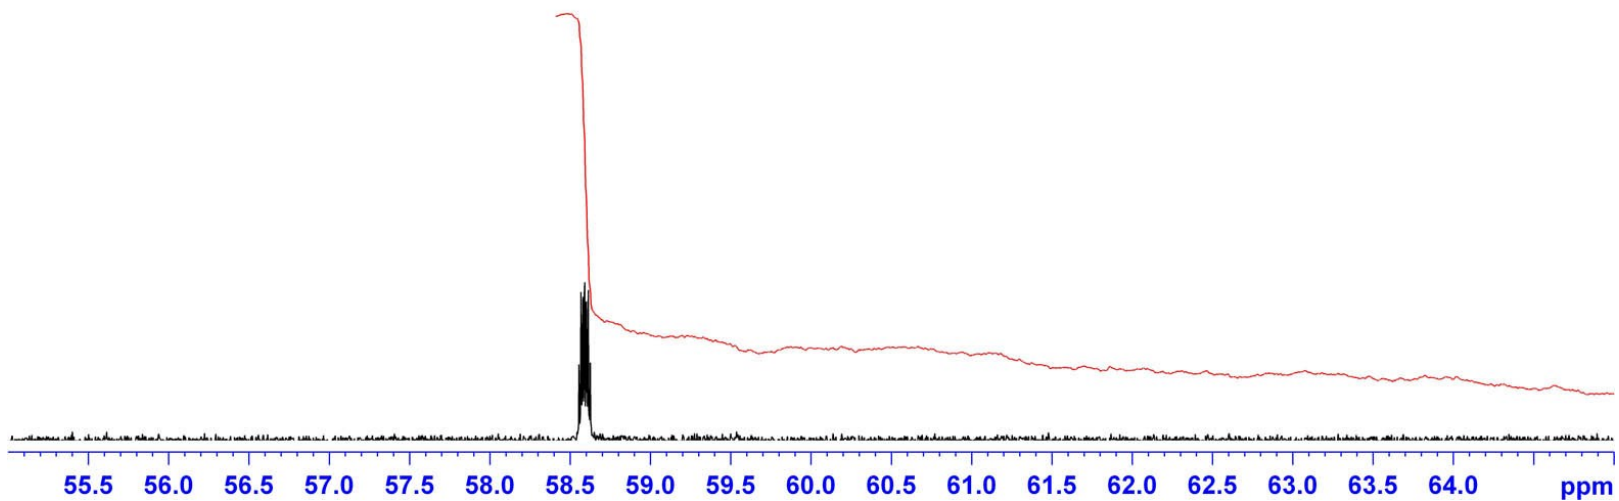

1.1.3.2. **CpmF**:  $\delta$  64.38 (1F, m)

CpmF\_FNMR\_Acd6

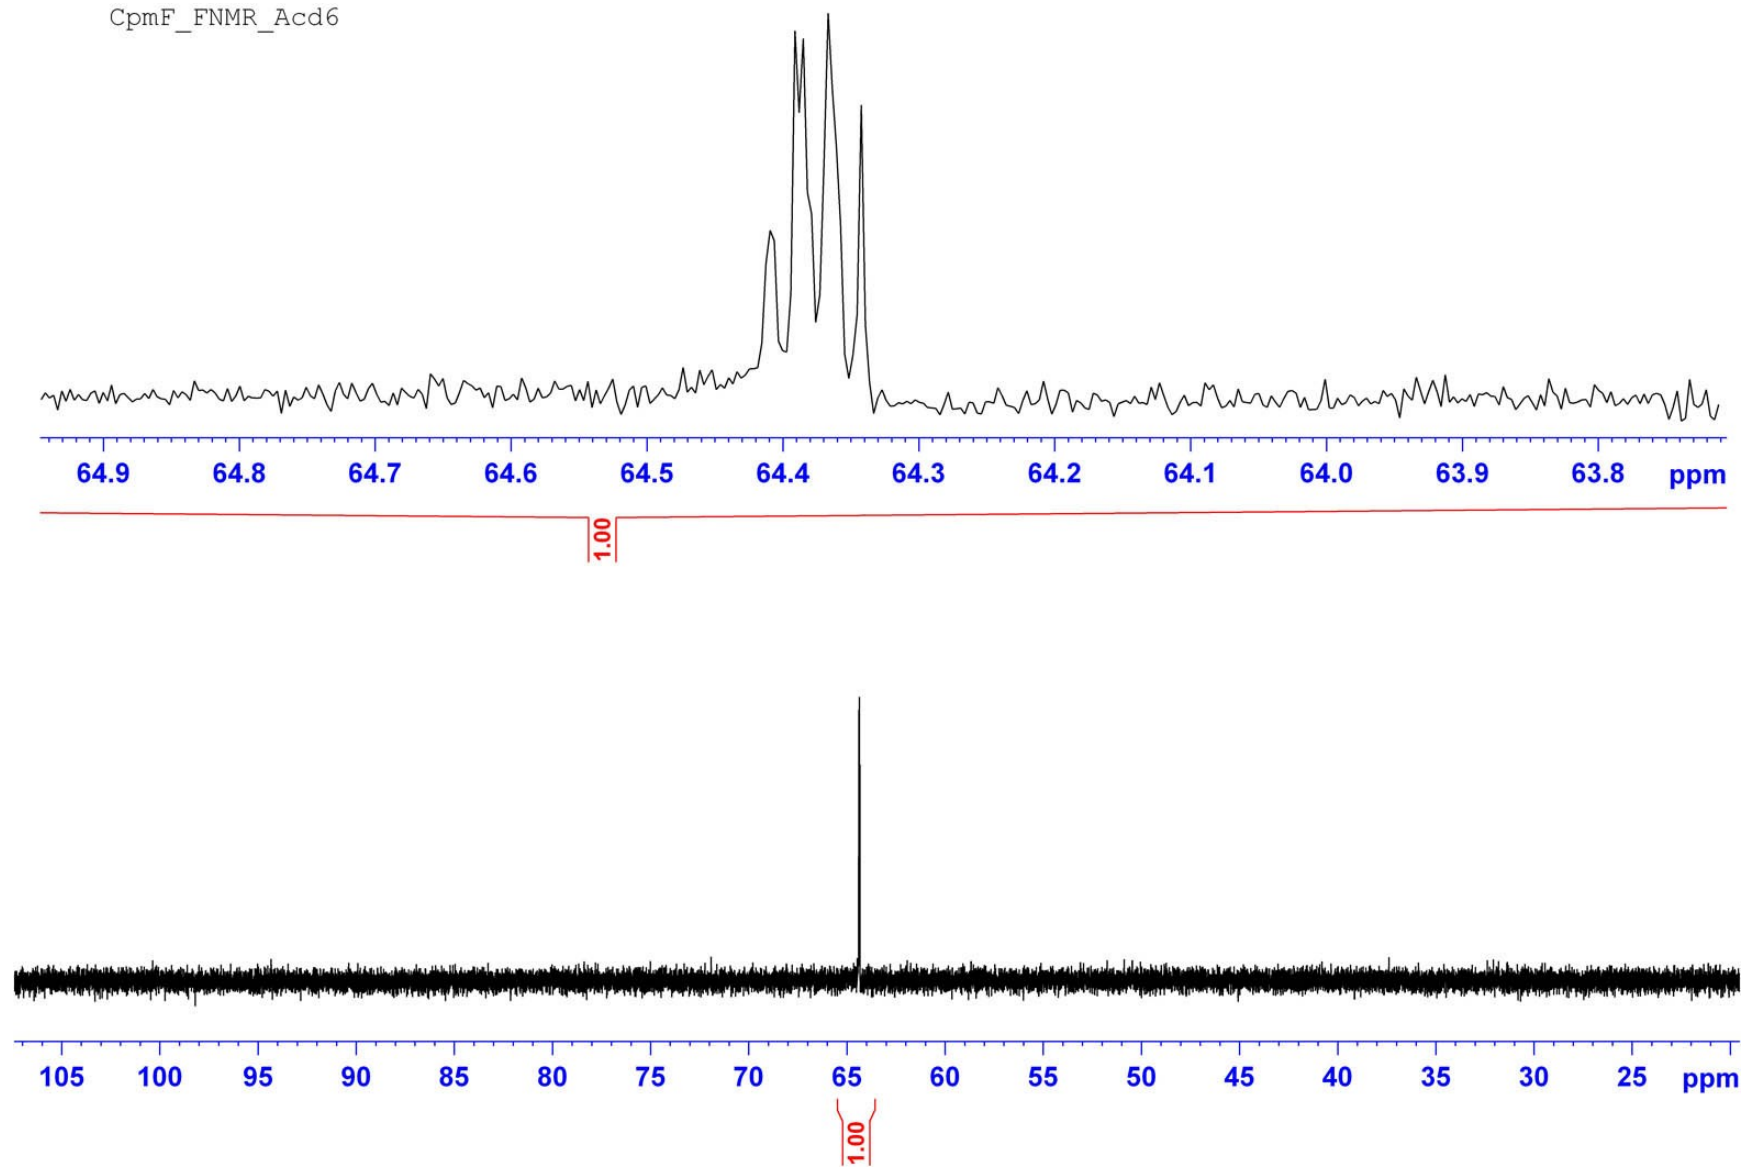

1.1.3.3. CpoF:  $\delta$  46.29 (1F, m)

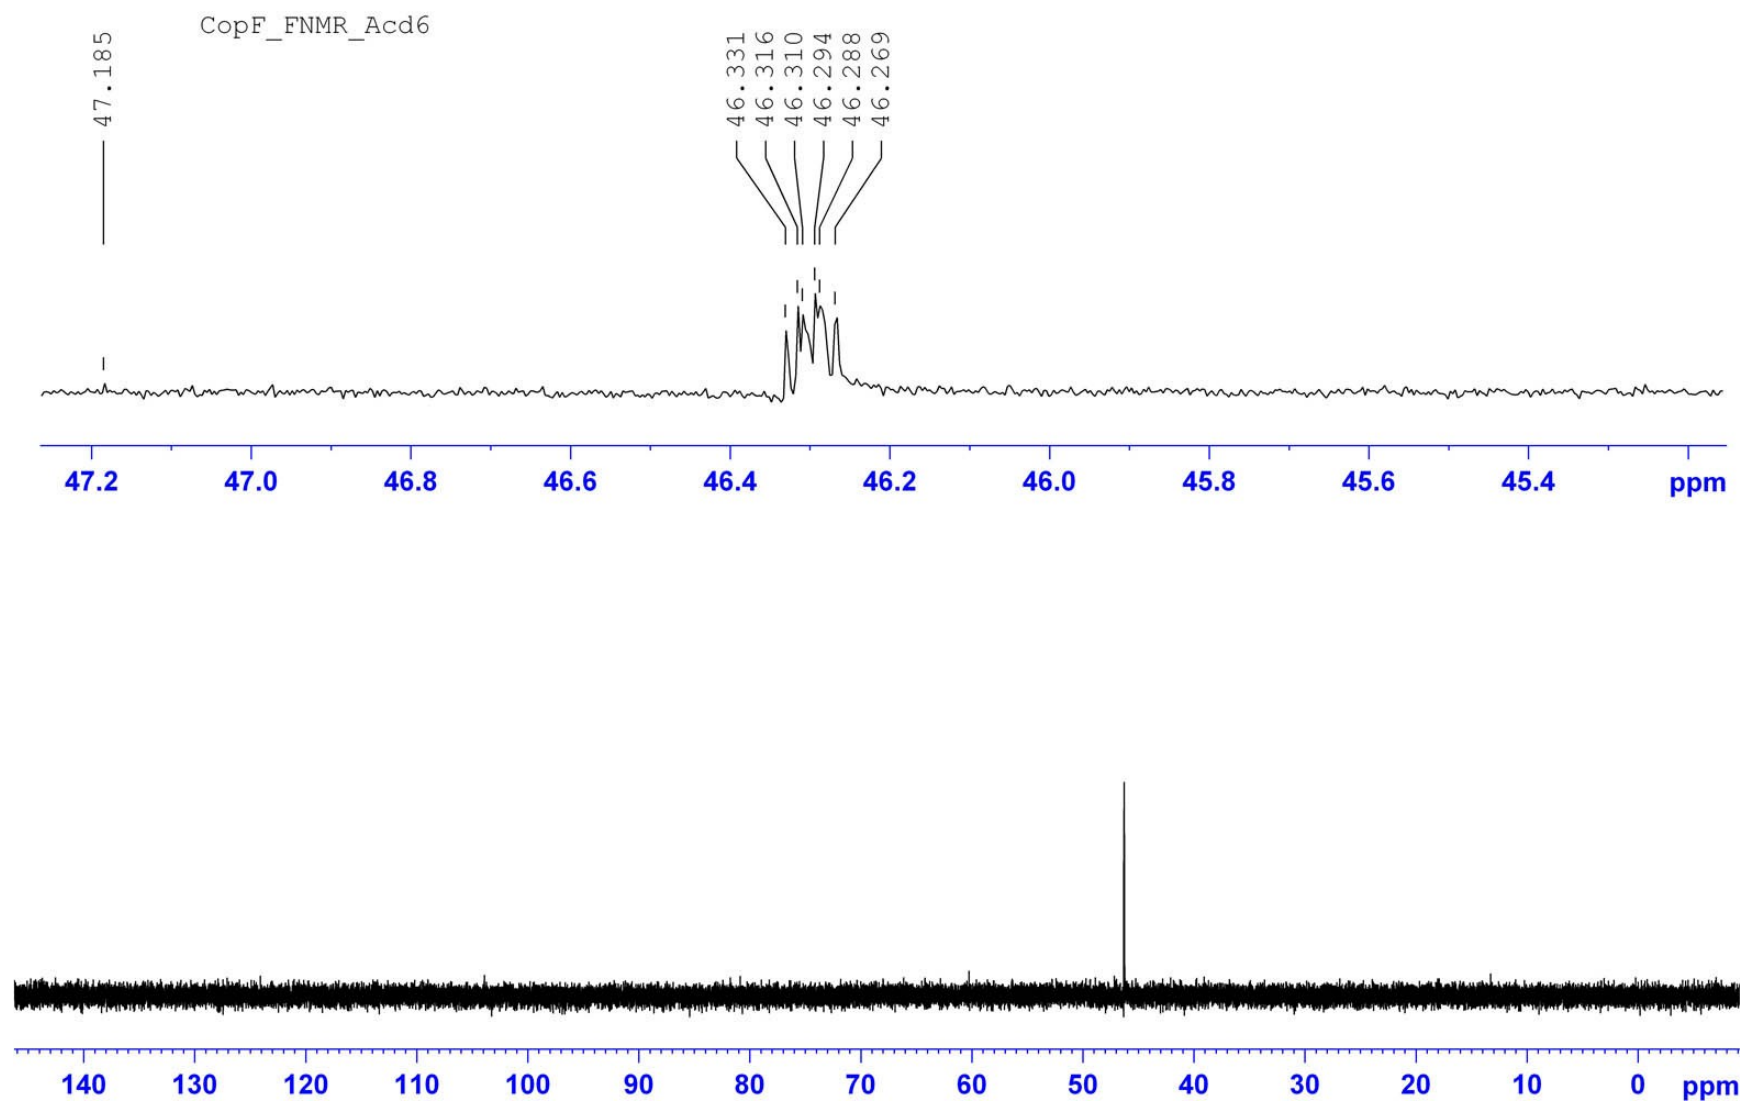

1.1.3.4. **CmpF**:  $\delta$  58.36 (1F, m).

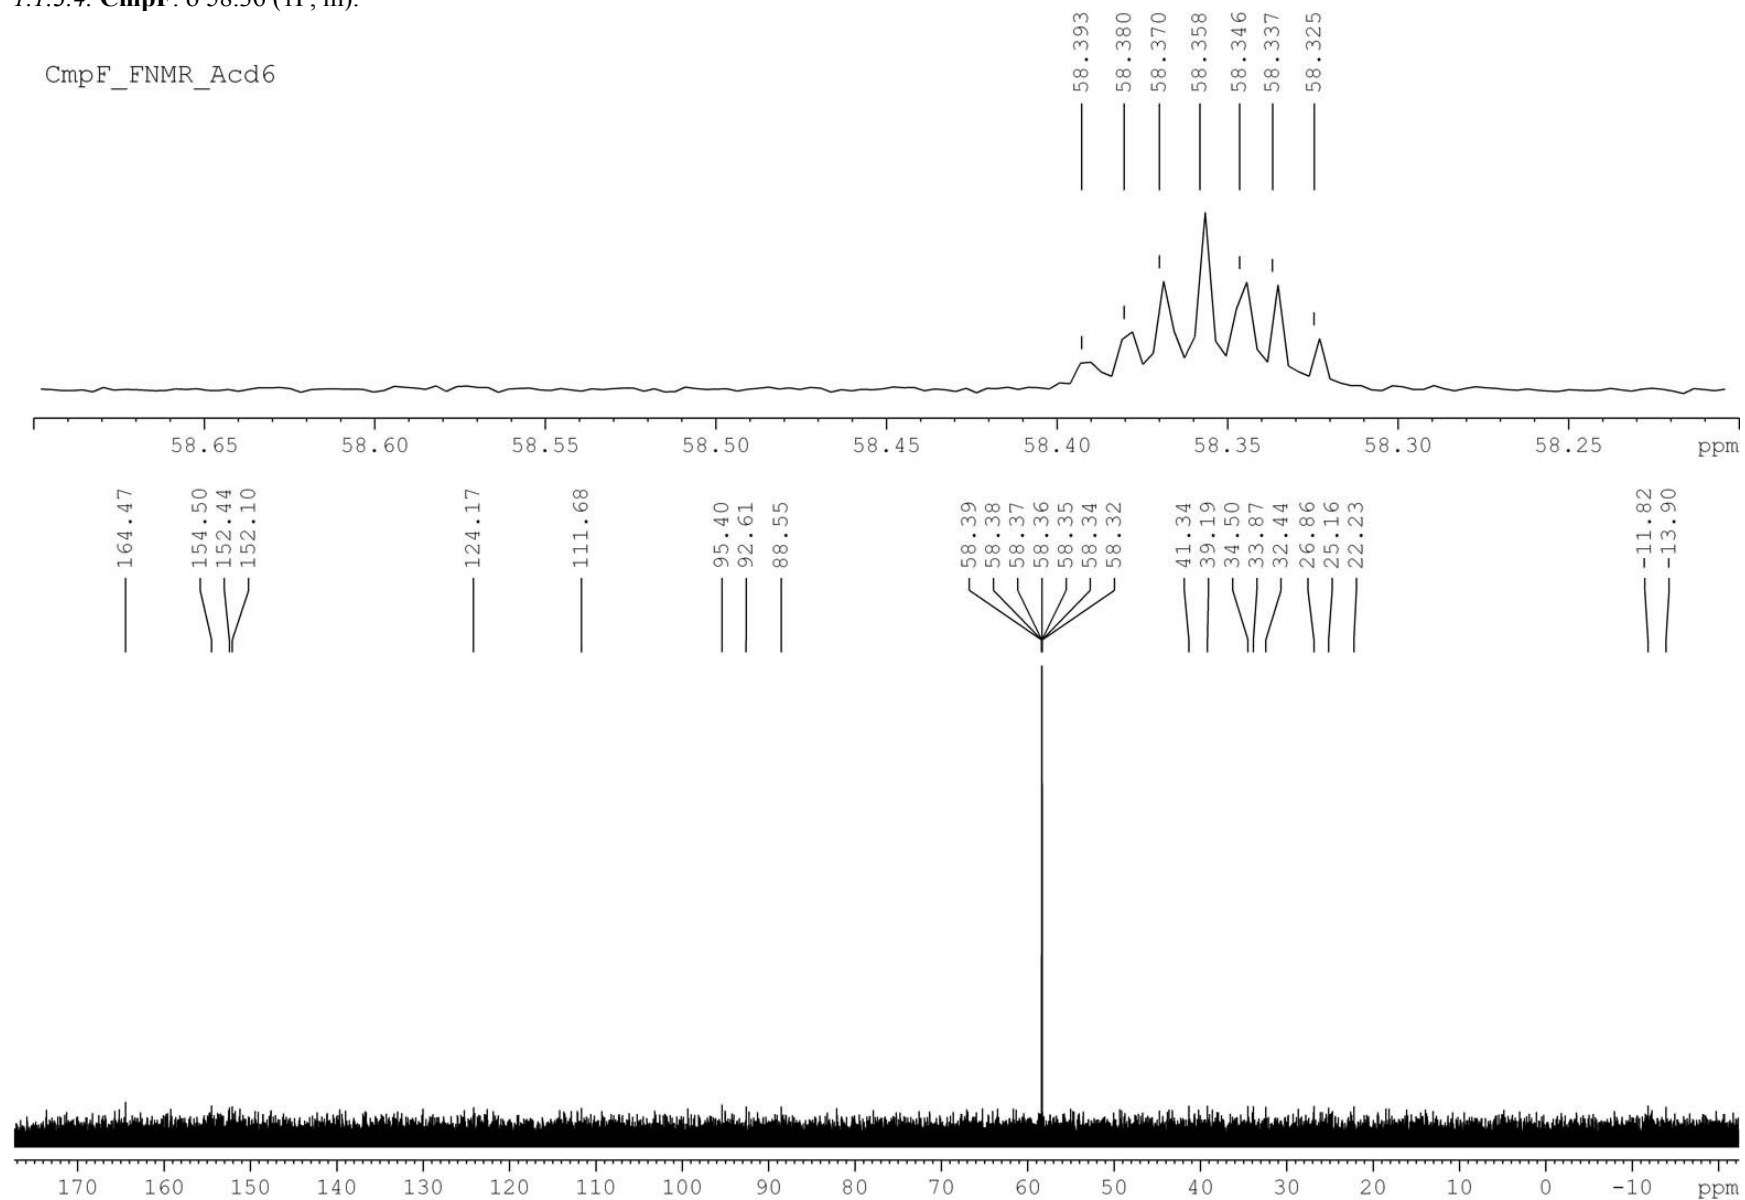

1.1.3.5. **CmmF**:  $\delta$  64.28 (1F, m)

CmmF\_FNMR\_Acd6

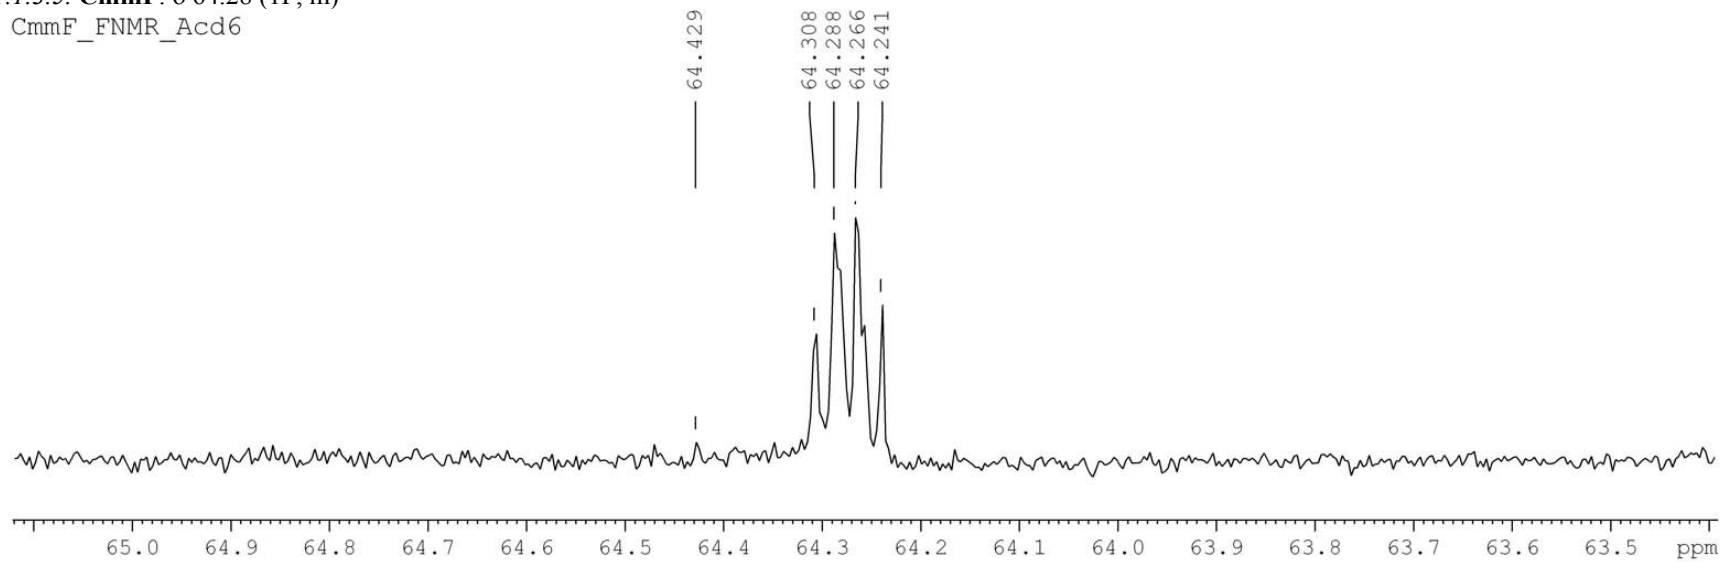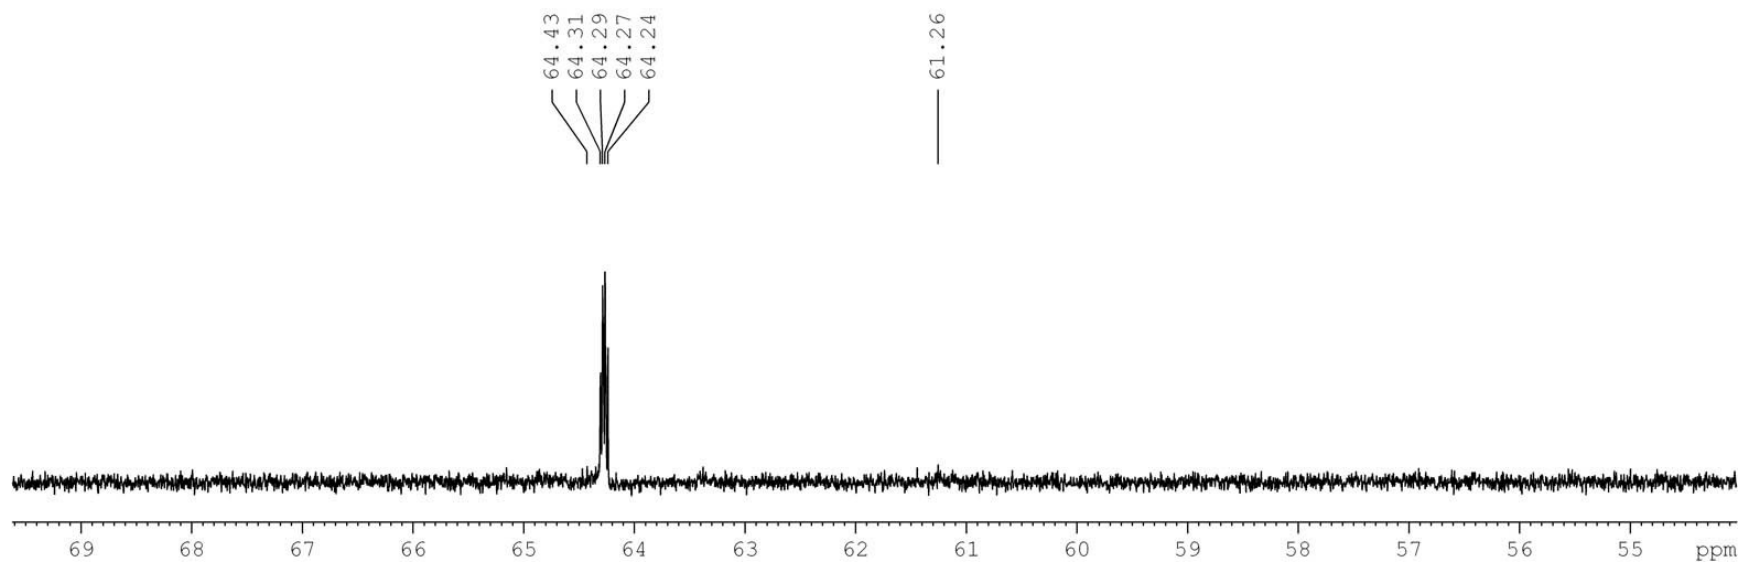



1.1.3.6. **CmoF**:  $\delta$  46.36 (1H, m);

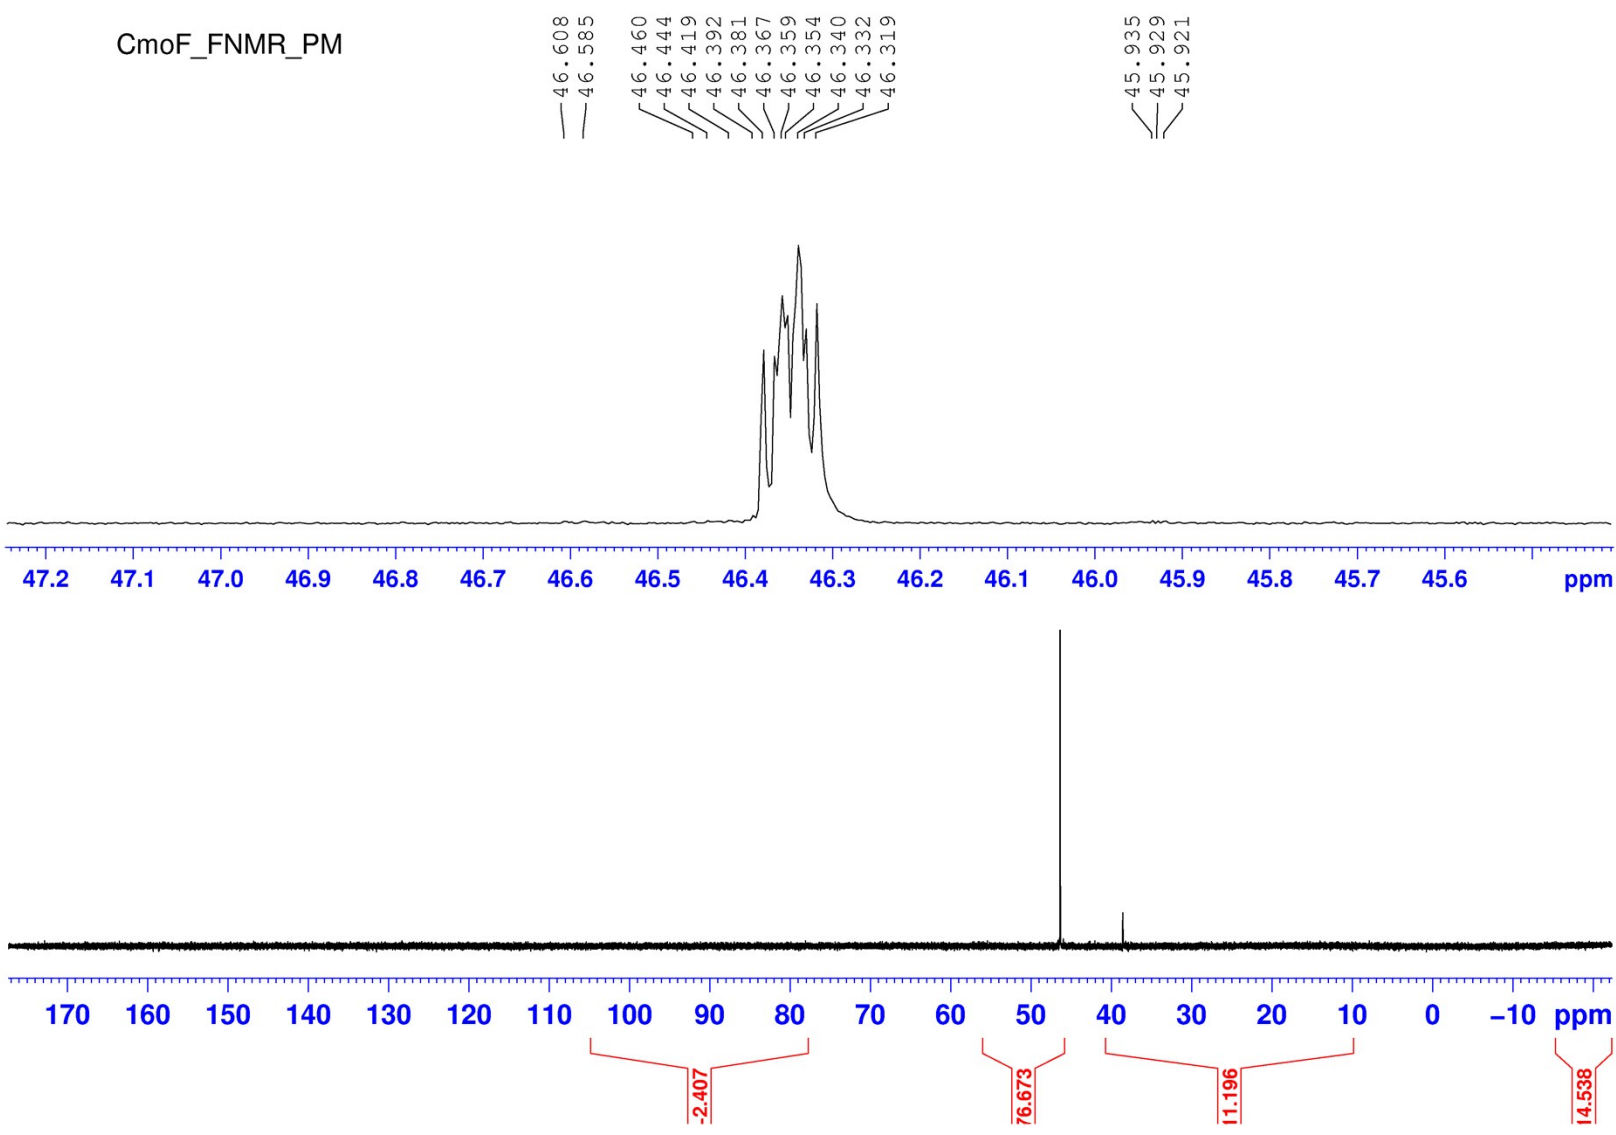

1.1.3.7. CopF:  $\delta$  58.37 (1H, m);

59.532  
59.522  
59.510

CopF\_FNMR\_PM

58.404  
58.392  
58.382  
58.370  
58.358  
58.349  
58.337

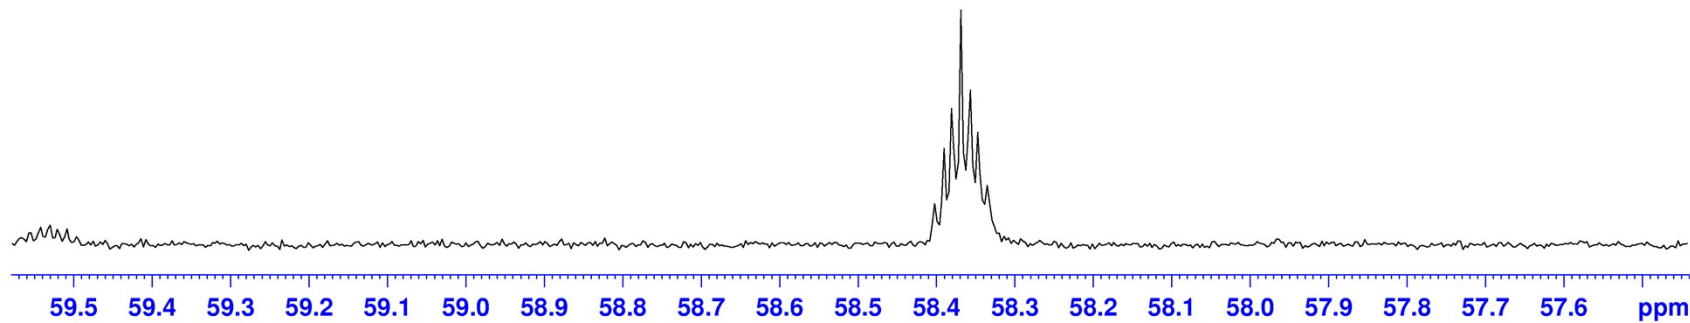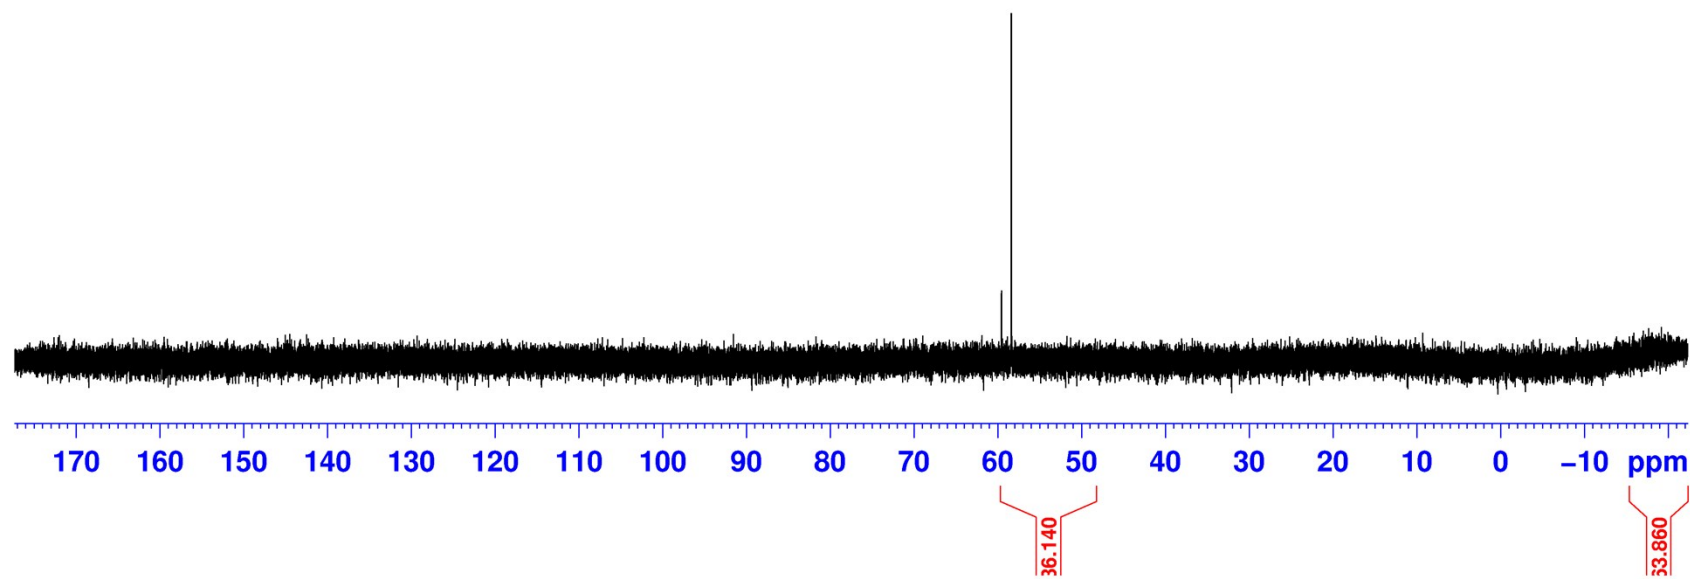

### 1.1.4. IR (ATR) data and spectra

1.1.4.1. **CppF**: 3251 (w), 3166 (w), 3032 (w), 2965 (w), 2899 (w), 2805 (w), 1751 (s), 1626 (m), 1611 (s), 1595 (s), 1531 (m), 1499 (s), 1421 (m).

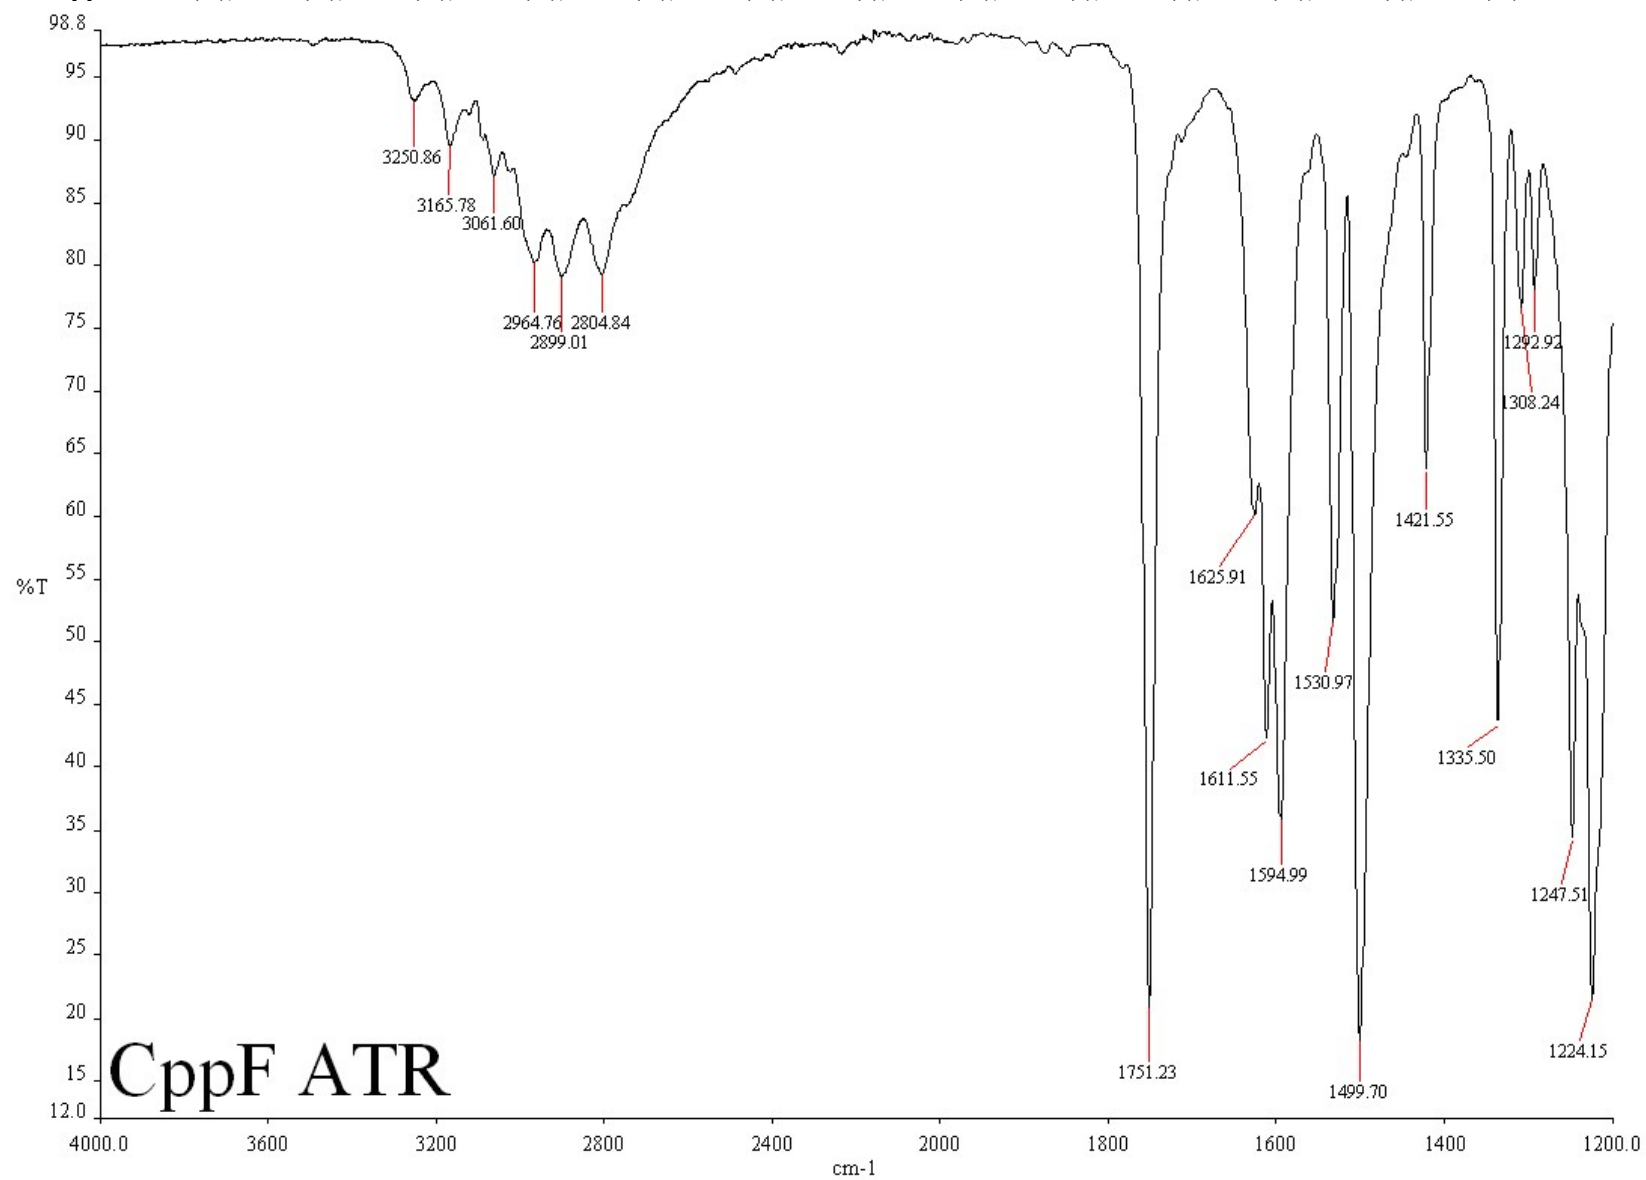

1.1.4.2. **CpmF**: 3248 (w), 3163 (w), 2958 (m), 2891 (m), 2794(m), 1749 (s), 1628 (m), 1594 (s), 1529 (s), 1485 (s), 1447 (m), 1421 (m).

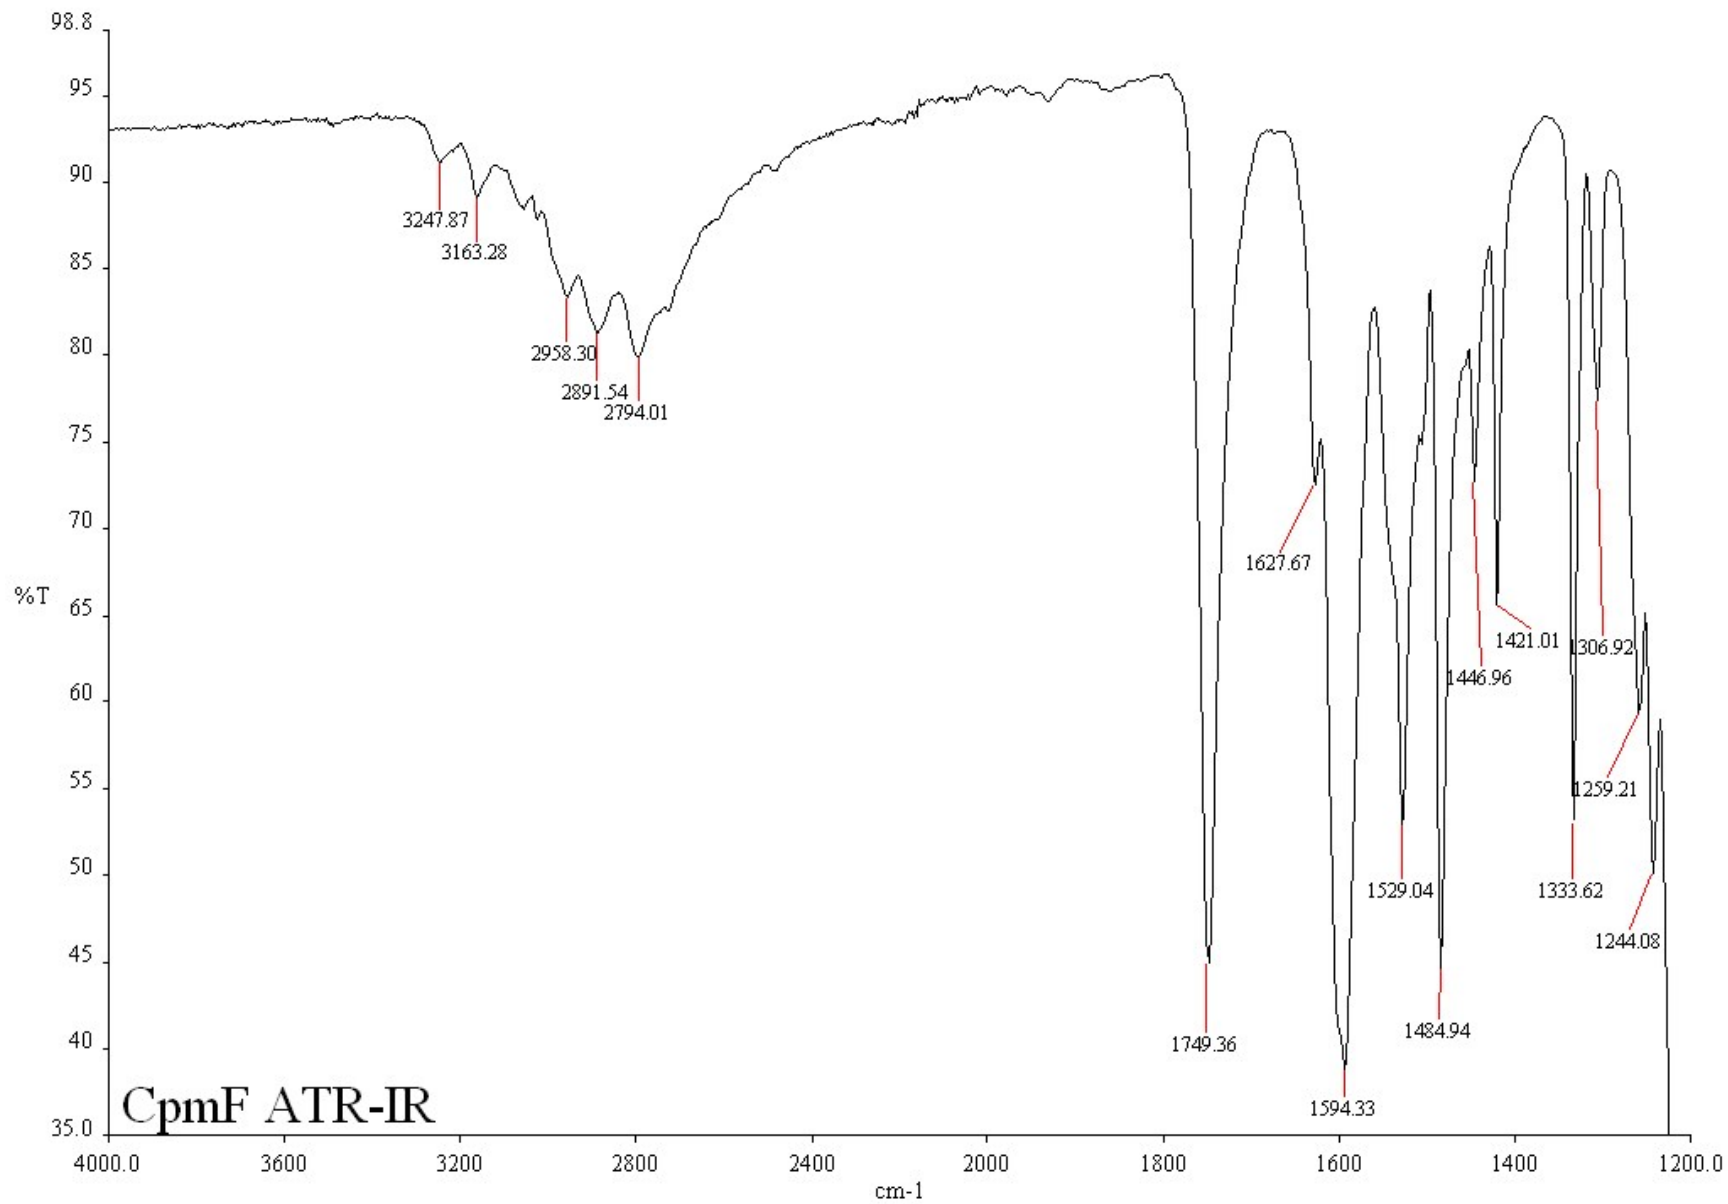

1.1.4.3. **CpoF**: 3176 (w), 2882 (m), 2741 (m), 1934 (w), 1752 (s), 1630 (s), 1594 (s), 1547 (m), 1498 (s), 1458 (m), 1422 (m).

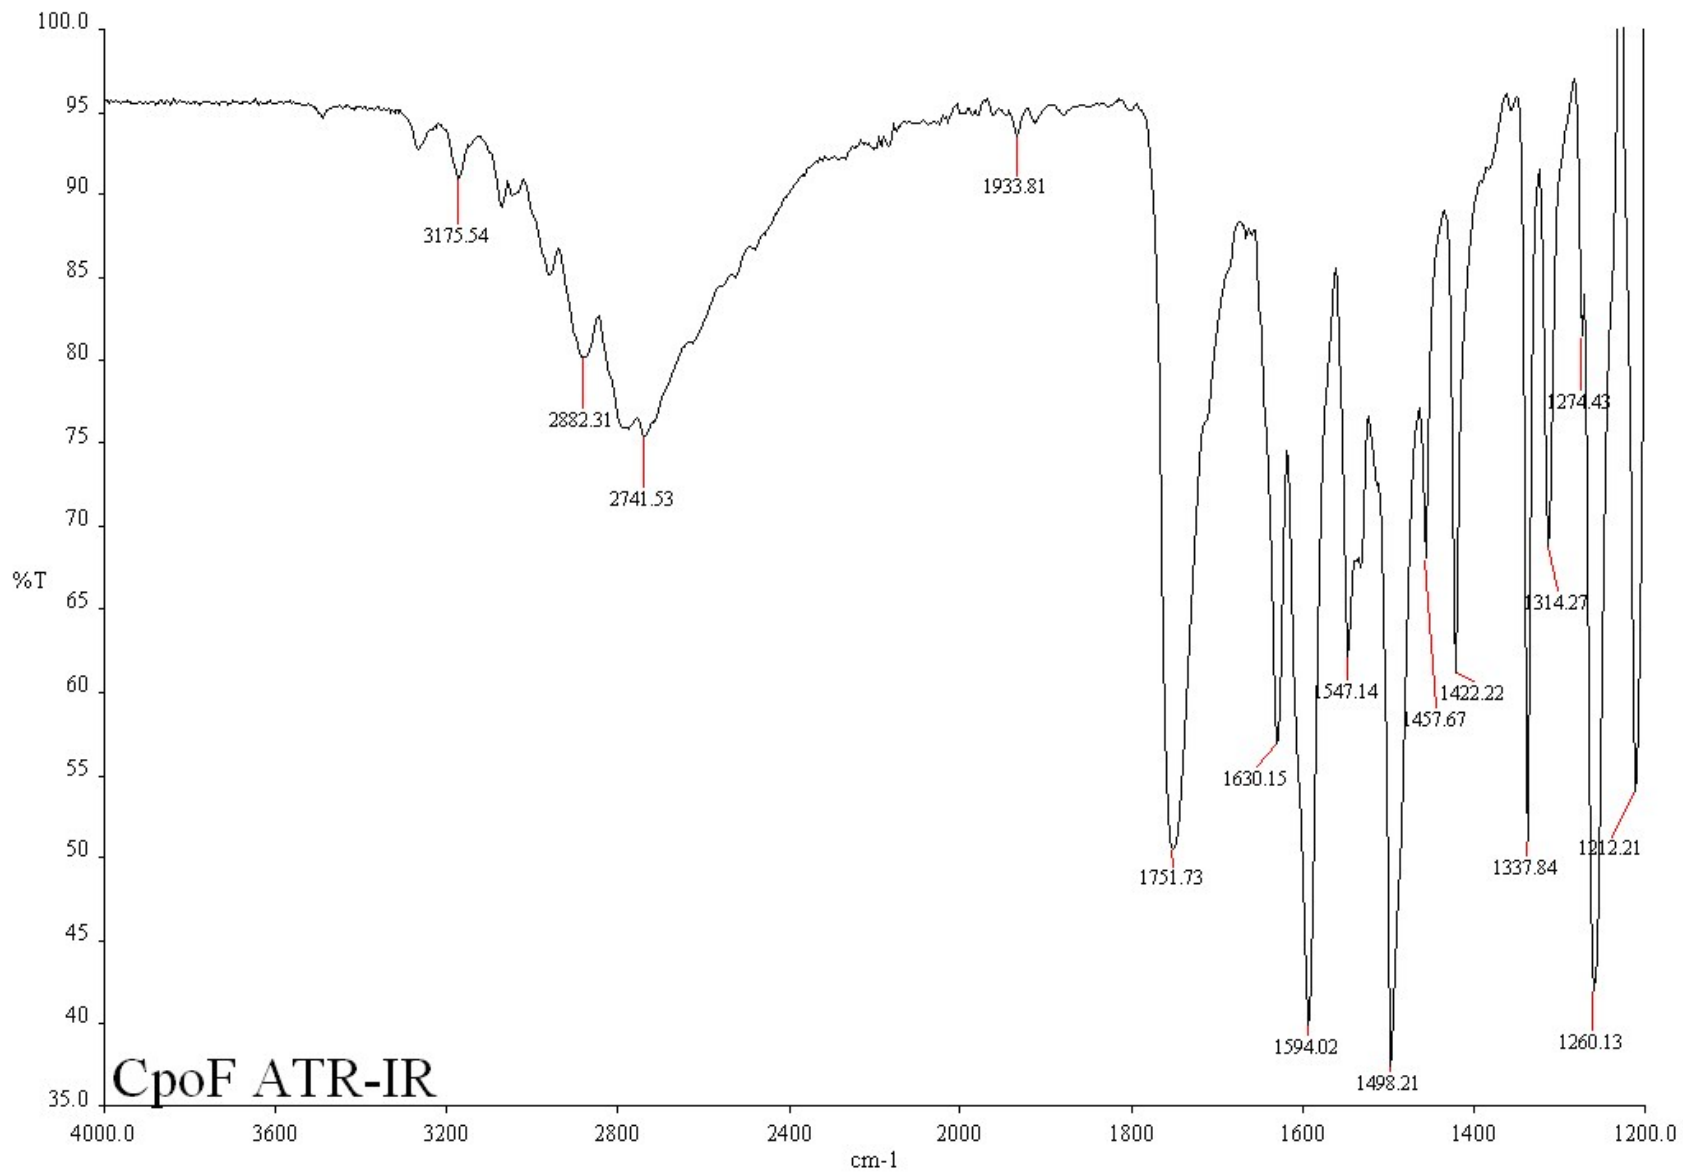

1.1.4.4. **CmpF**: 3178 (w), 3124 (w), 3080 (w), 2930 (w), 2822 (w), 1740 (s), 1602 (m), 1588 (s), 1563 (m), 1504 (s), 1477 (m), 1427 (s).

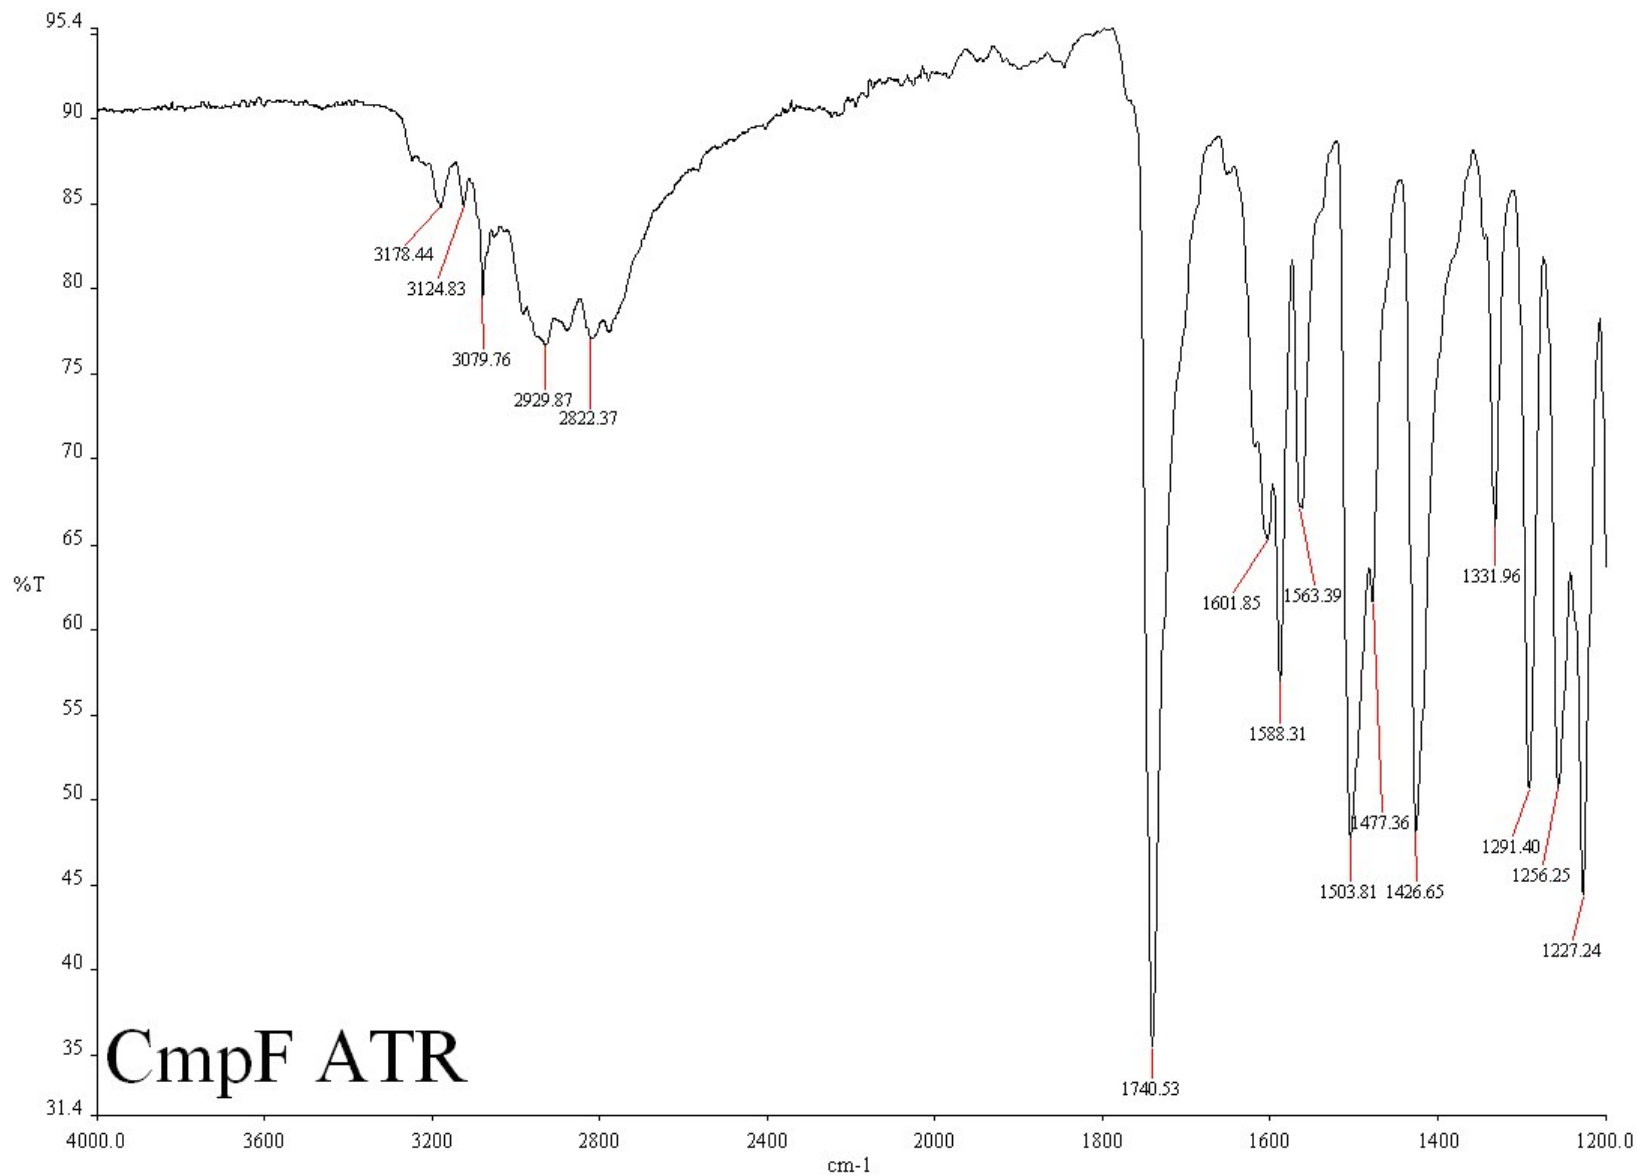

1.1.4.5. **CmmF**: 3180 (w), 2811 (m), 1745 (s), 1606 (s), 1588 (s), 1559 (m), 1486 (s), 1450 (m), 1425 (s).

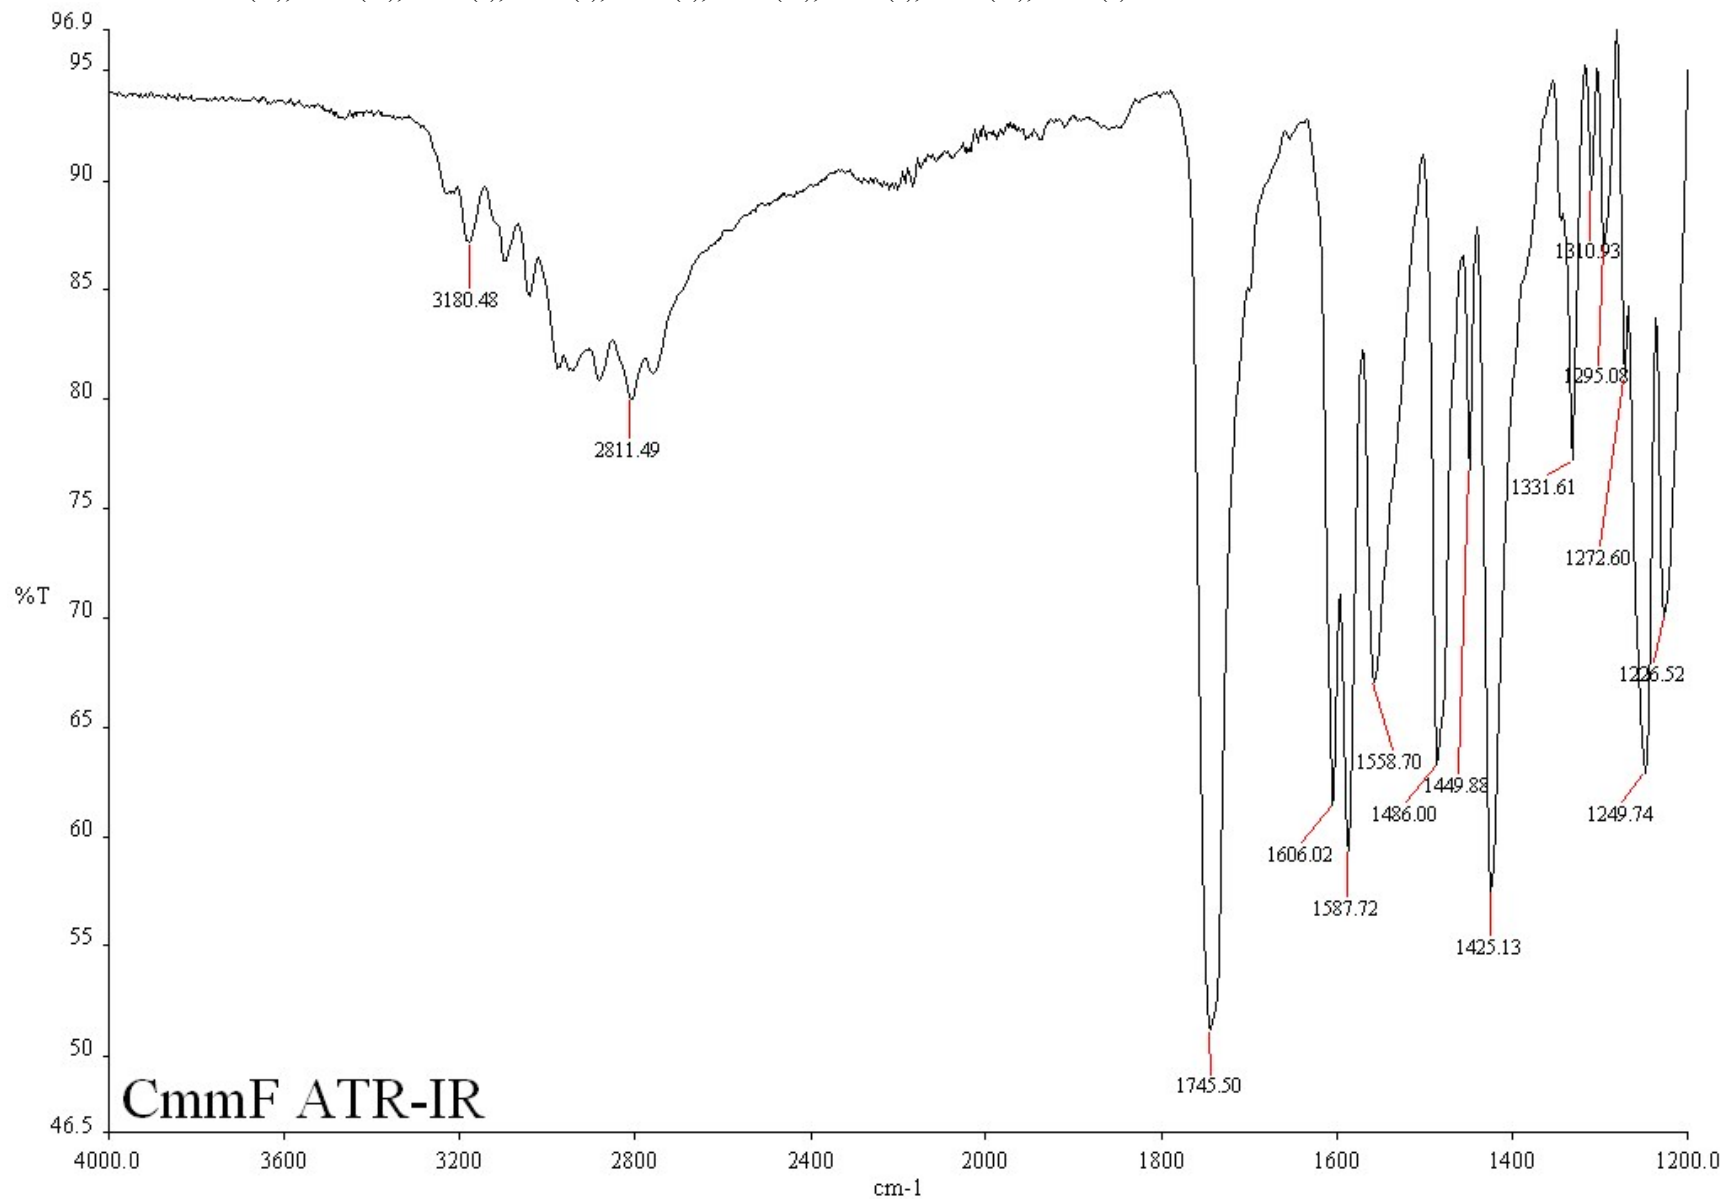

1.1.4.6. **CmoF**: 3192 (w), 2986 (m), 2825 (m), 1743 (s), 1625 (m), 1611 (m), 1560 (s), 1504 (s), 1484 (s), 1458 (m), 1417 (m).

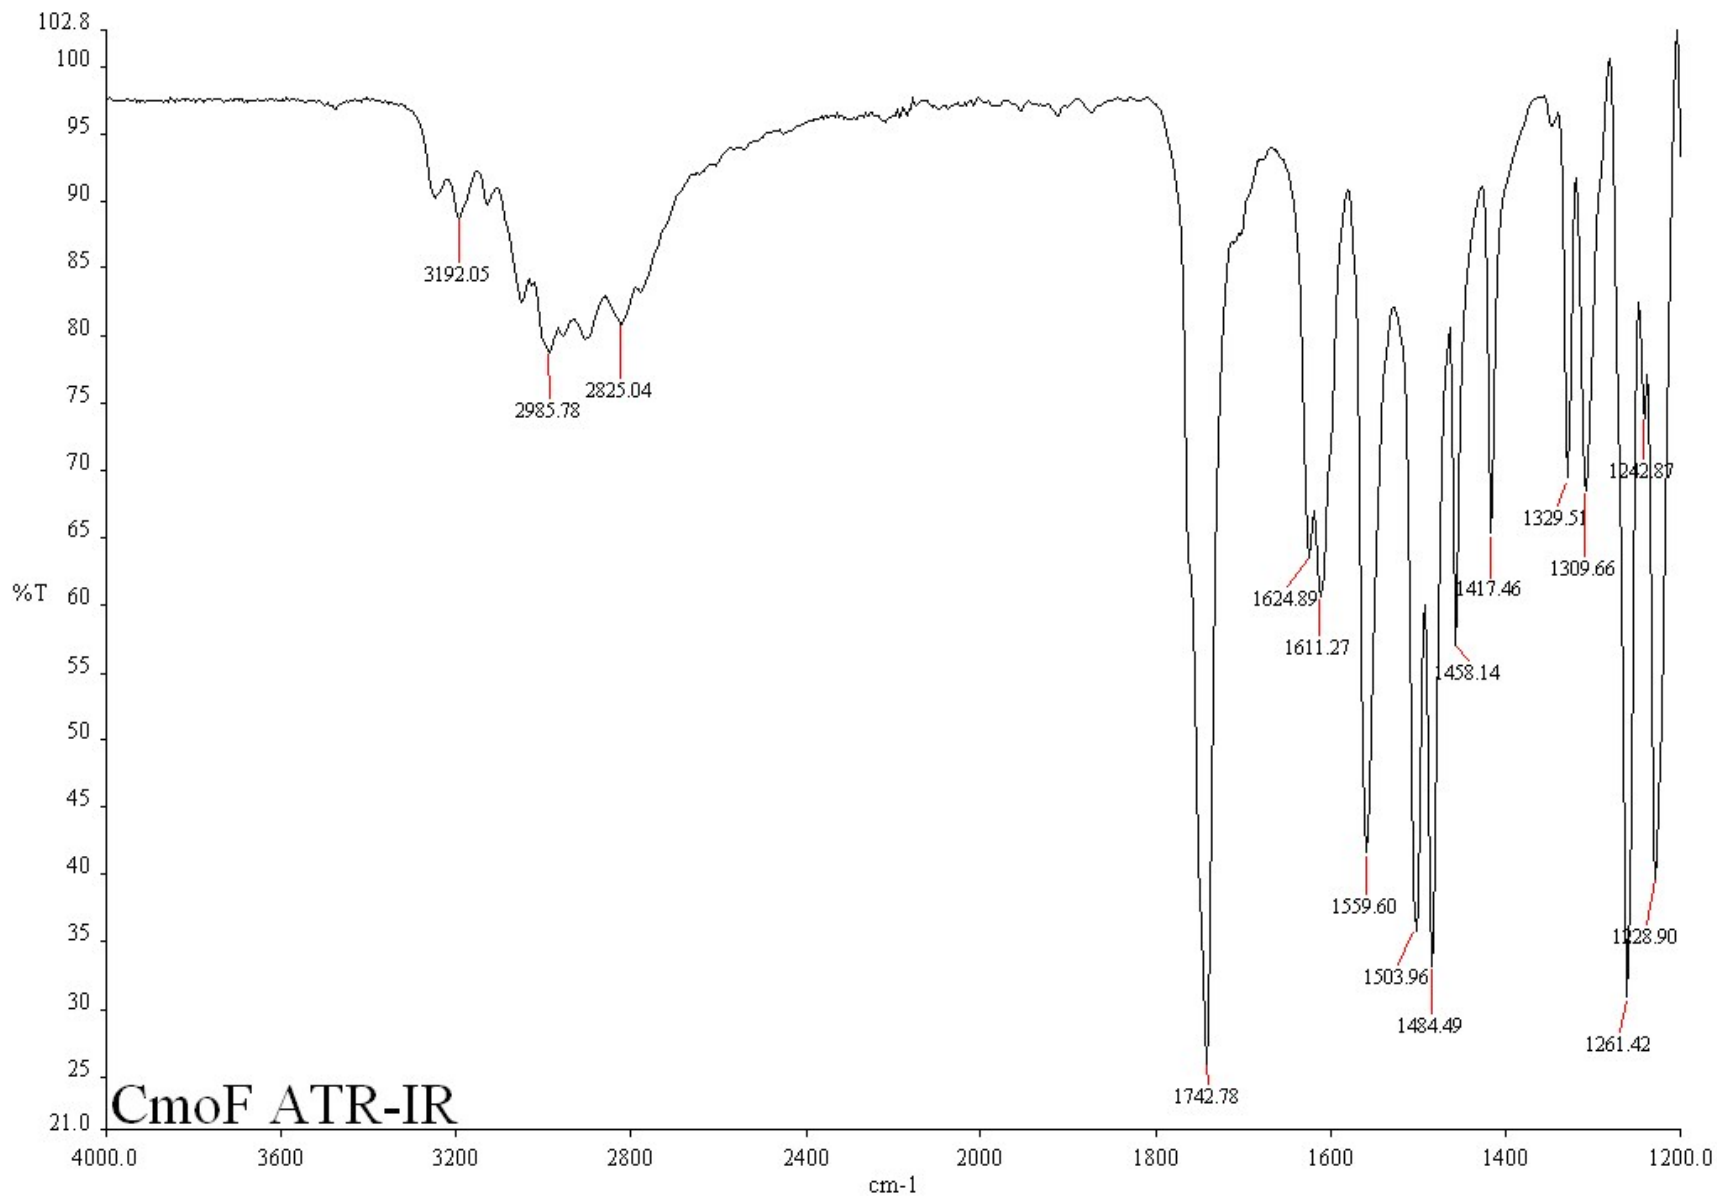



1.1.4.7. **CopF**: 3182 (w), 3122 (w), 3090 (w), 2959 (m), 2827 (w), 1741 (s), 1609 (s), 1587 (s), 1547 (s), 1500 (s), 1470 (m), 1440 (s), 1416 (m);

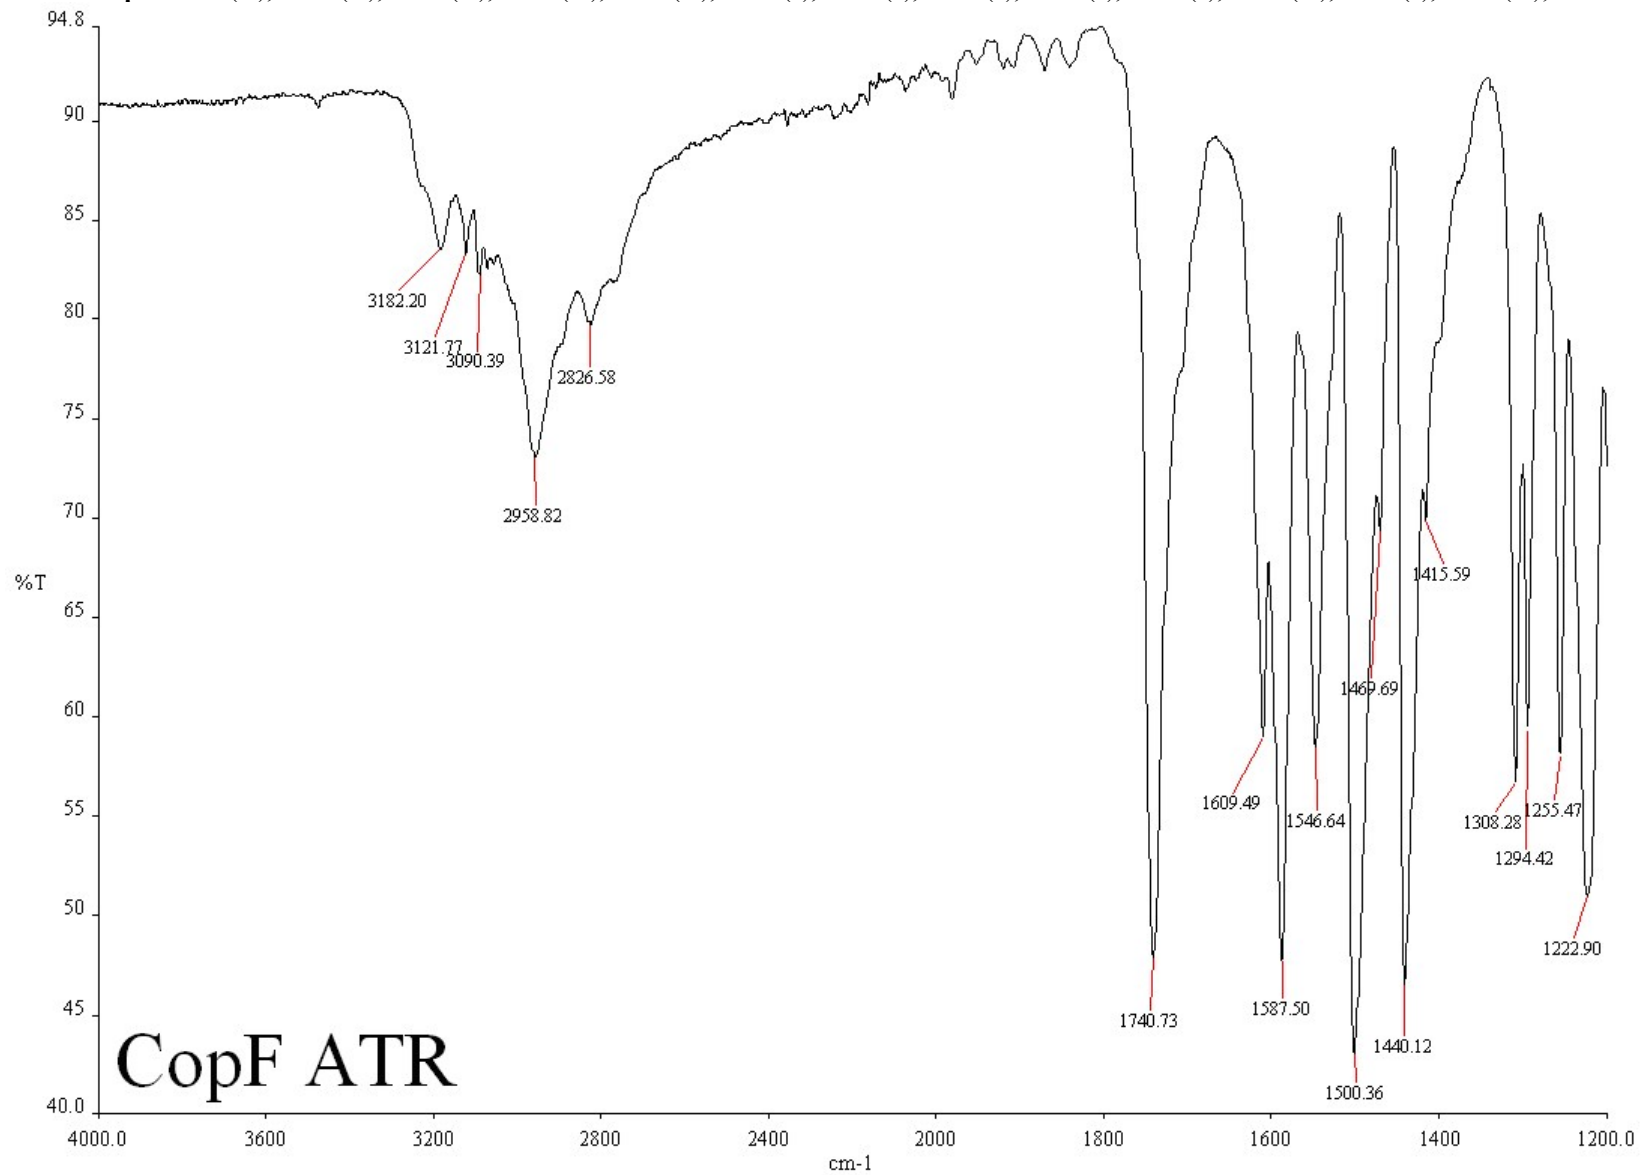

CopF ATR

## 1.2. CxxCl isomer grid

|                                |                    |                                                                                                    |
|--------------------------------|--------------------|----------------------------------------------------------------------------------------------------|
| <b><sup>1</sup>H NMR data</b>  | <b>pages 39-56</b> | (run in CD <sub>3</sub> COCD <sub>3</sub> , acetone- <i>d</i> <sub>6</sub> and CDCl <sub>3</sub> ) |
| <b><sup>13</sup>C NMR data</b> | <b>pages 57-65</b> |                                                                                                    |
| <b>Infra-red data</b>          | <b>pages 66-74</b> |                                                                                                    |

**1.2.1. <sup>1</sup>H NMR data and spectra (400 MHz)**

1.2.1.1. **CppCl** (Acetone-*d*<sub>6</sub>): δ 7.30 (2H, dt, <sup>3</sup>*J* = 8.8, <sup>4</sup>*J* = 2.2), 7.48 (2H, dt, <sup>3</sup>*J* = 8.8, <sup>4</sup>*J* = 2.3), 7.57 (2H, dd, <sup>3</sup>*J* = 4.5, <sup>4</sup>*J* = 1.5), 8.48 (2H, dd, <sup>3</sup>*J* = 4.5, <sup>4</sup>*J* = 1.3); 9.68 (1H, br s);

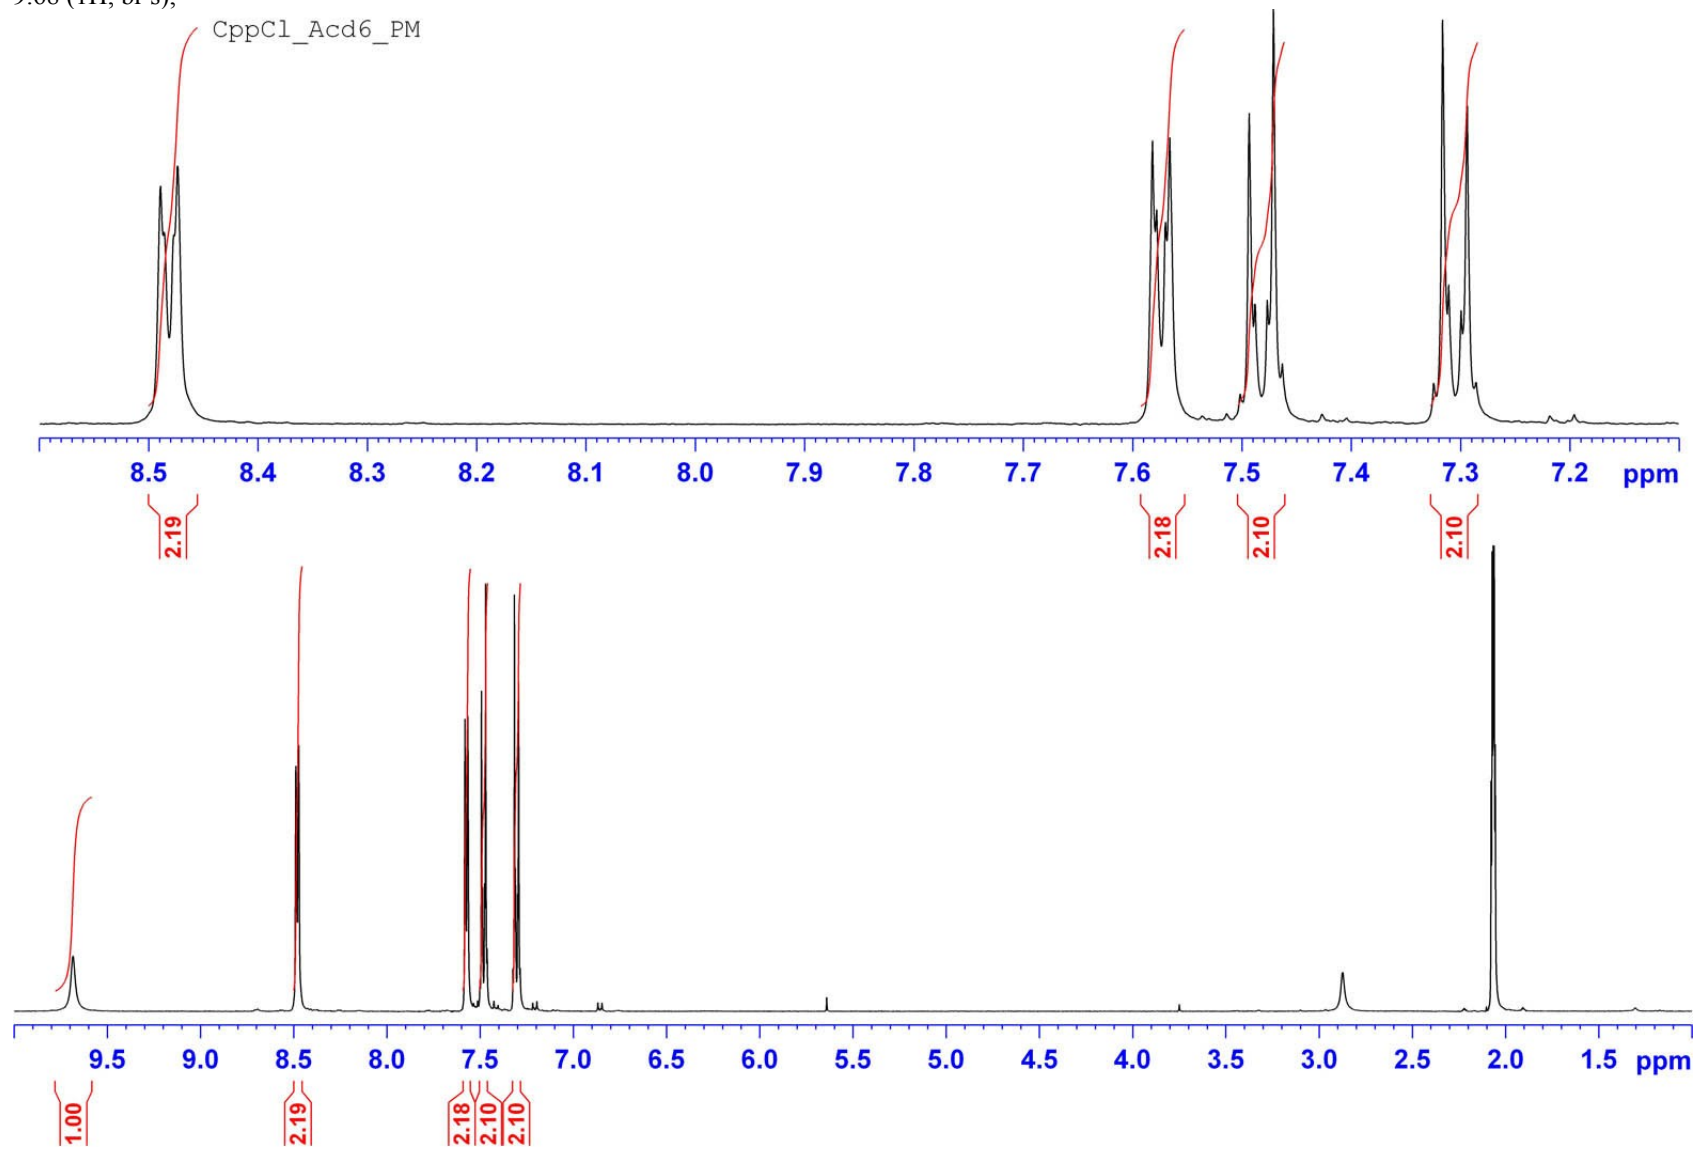

1.2.1.2. **CppCl** (CDCl<sub>3</sub>) δ 7.06 (2H, dt, <sup>3</sup>J = 8.8, <sup>4</sup>J = 2), 7.31 (2H, m), 7.55 (2H, d, <sup>3</sup>J = 5.5), 7.98 (1H, br s), 8.44 (2H, d, <sup>3</sup>J = 5.6);  
CppCl\_CDCl3\_PM

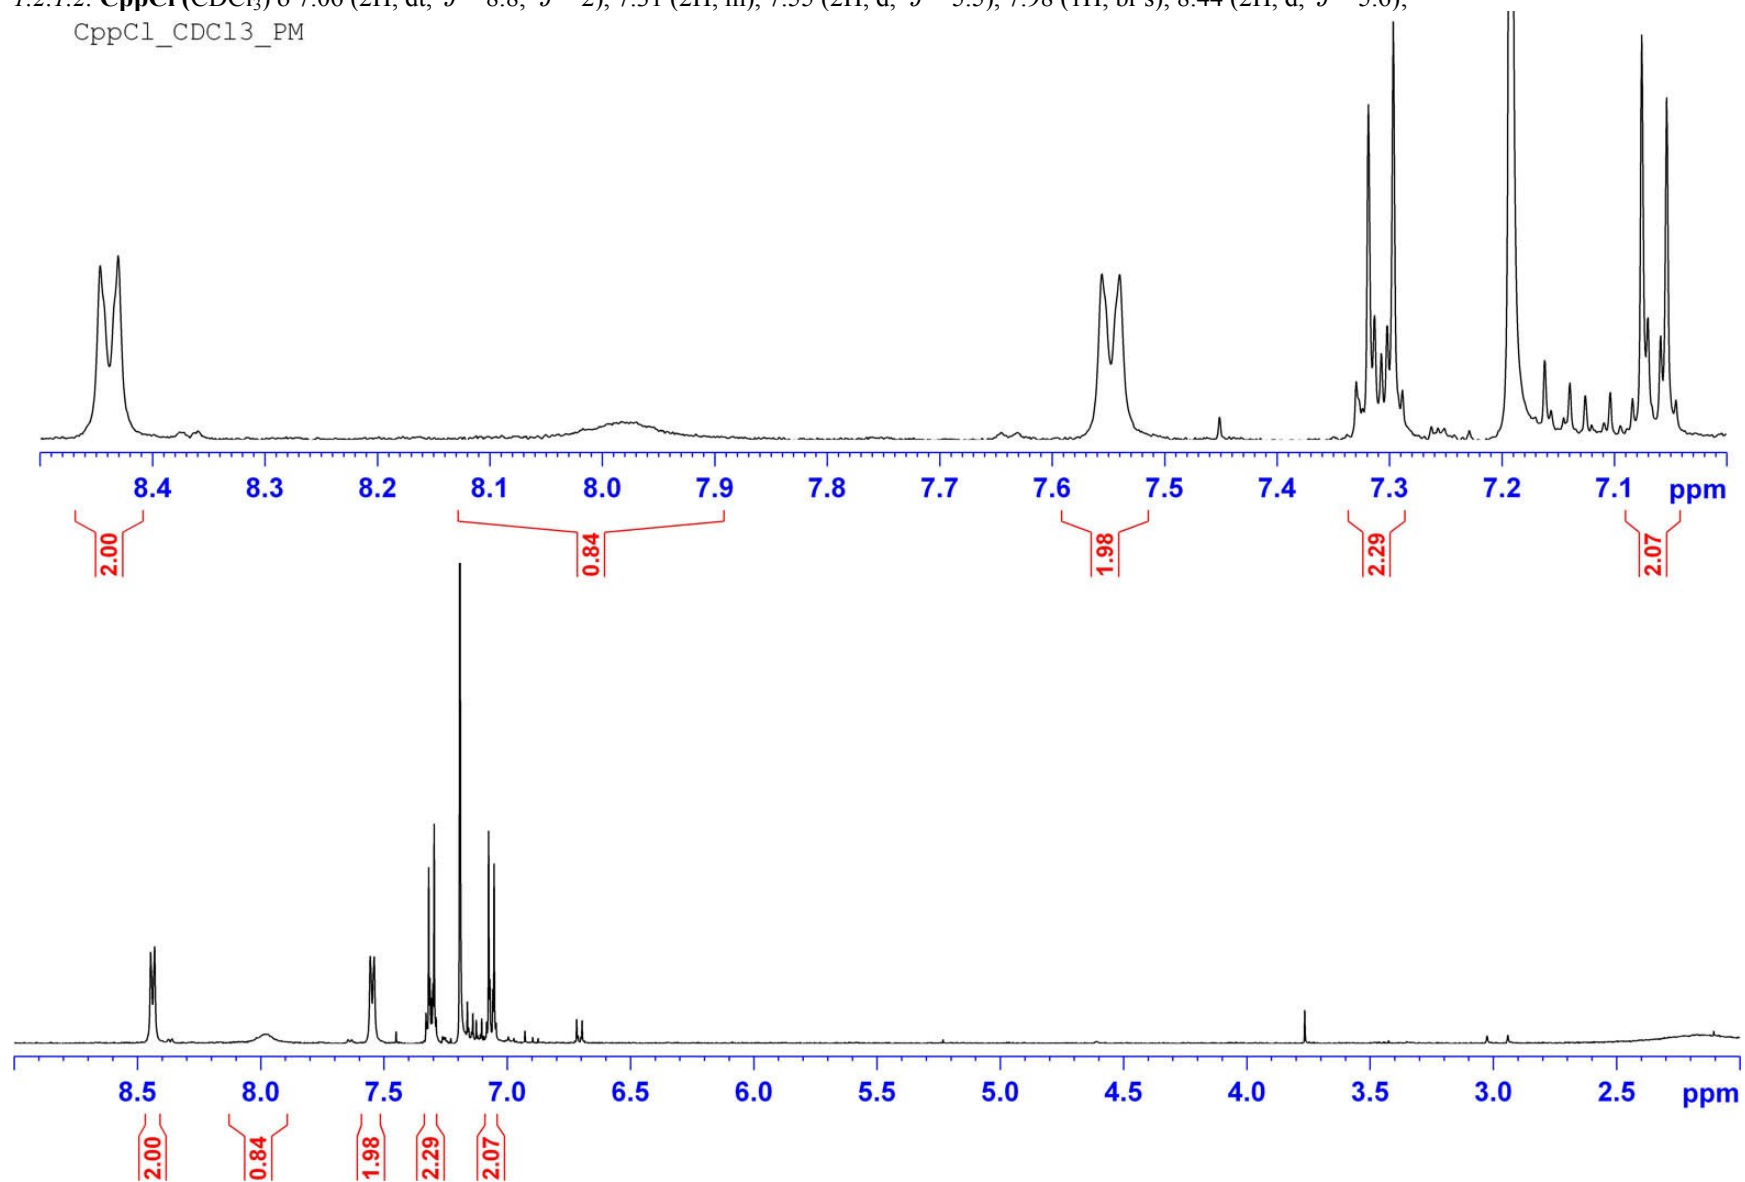

1.2.1.3. **CpmCl** (600 MHz, Acetone- $d_6$ ):  $\delta$  7.11 (1H, ddd,  $^3J=8.3$ ,  $^4J=2.2$ ,  $^5J=0.8$ ), 7.20 (1H, ddd,  $^3J=8.0$ ,  $^4J=1.9$ ,  $^5J=0.8$ ), 7.24 (1H, t,  $^3J=2.1$ ), 7.34 (1H, t,  $^3J=8.2$ ), 7.43 (2H, dd,  $^3J=5.0$ ,  $^4J=1.5$ ), 8.34 (2H, dd,  $^3J=4.8$ ,  $^4J=1.4$ ), 9.55 (1H, br s);  
CpmCl\_HNMR\_Acd6

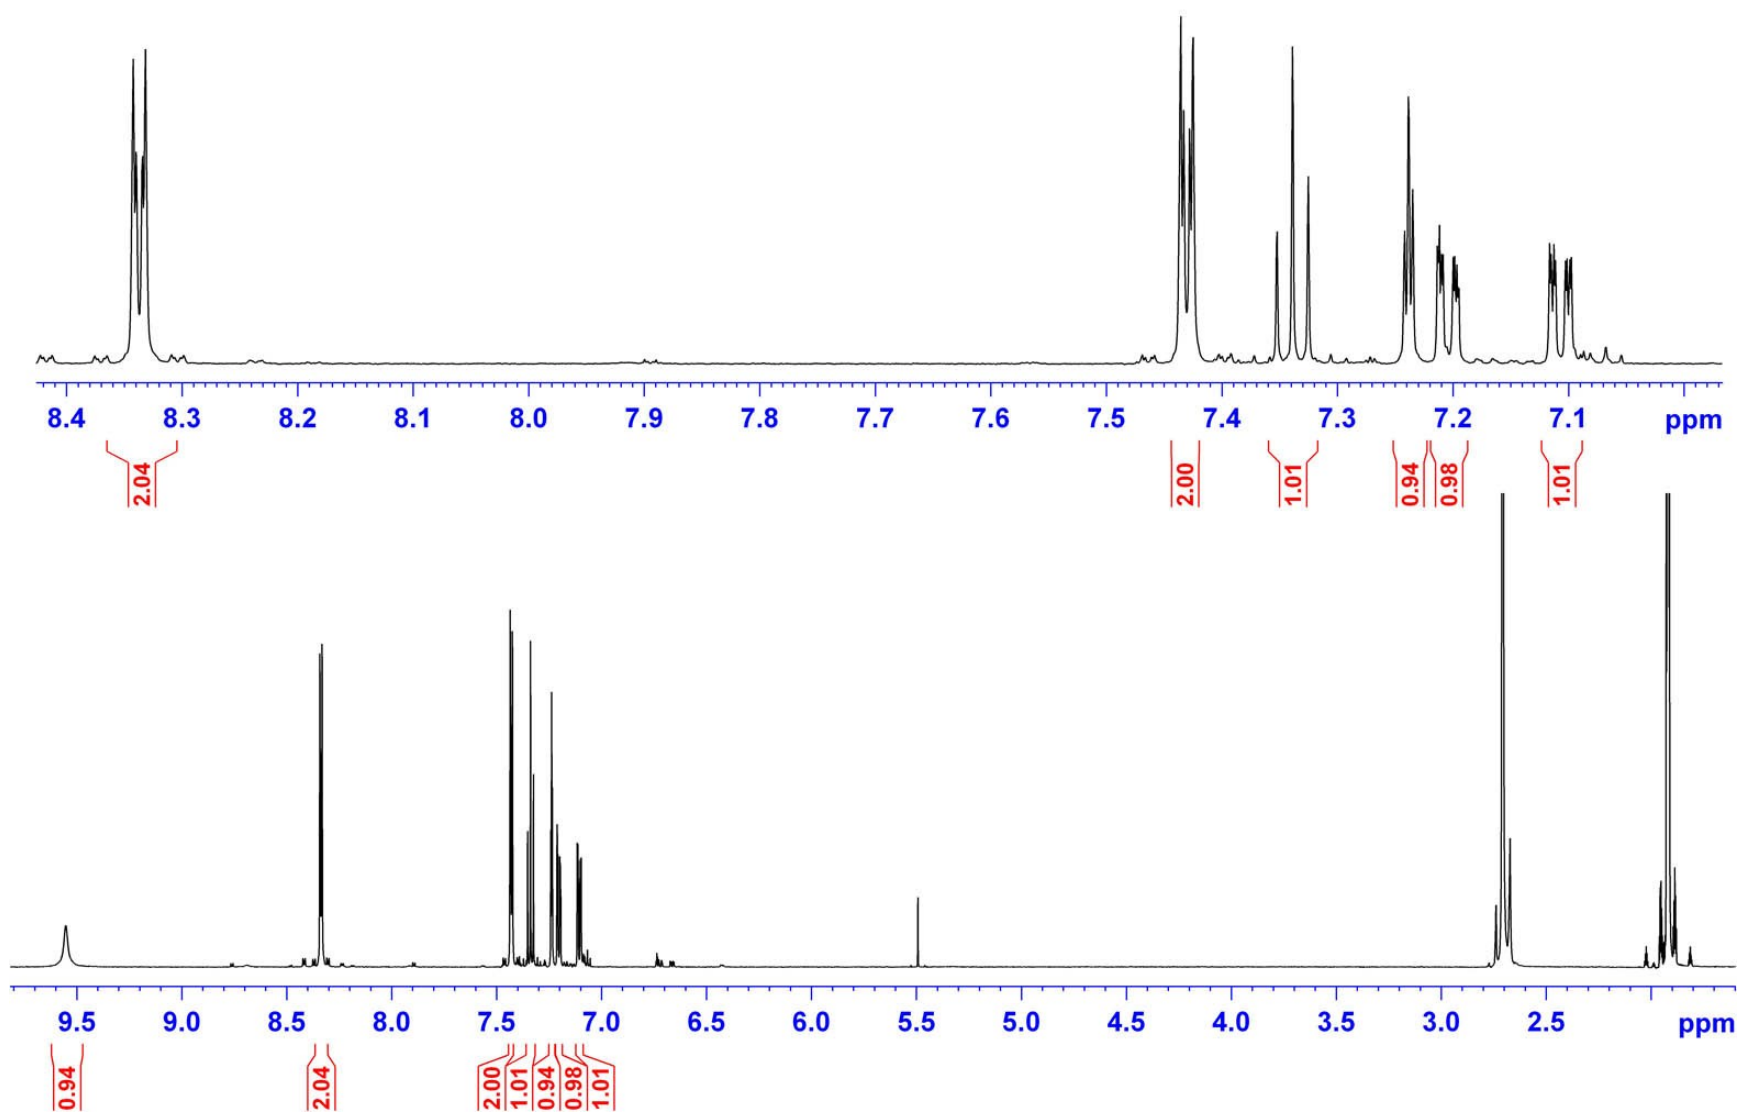

1.2.1.4. **CpmCl** (CDCl<sub>3</sub>) δ 7.04 (1H, ddd, <sup>3</sup>J = 8.1, <sup>4</sup>J = 2.3, <sup>5</sup>J = 1.0), [7.14 (1H, br s), 7.17 (1H, t, <sup>3</sup>J = 2.0), 7.21 (1H, ddd, <sup>3</sup>J = 8.0, <sup>4</sup>J = 1.9, <sup>5</sup>J = 1.1), 7.28 (1H, t, <sup>3</sup>J = 8.1) includes residual CHCl<sub>3</sub> solvent], 7.34 (2H, dd, <sup>3</sup>J = 4.5, <sup>4</sup>J = 1.5), 8.46 (2H, d, <sup>3</sup>J = 5.7); (Refer to previous page for the acetone-*d*<sub>6</sub> spectrum)

CpmCl\_CDCl3\_PM

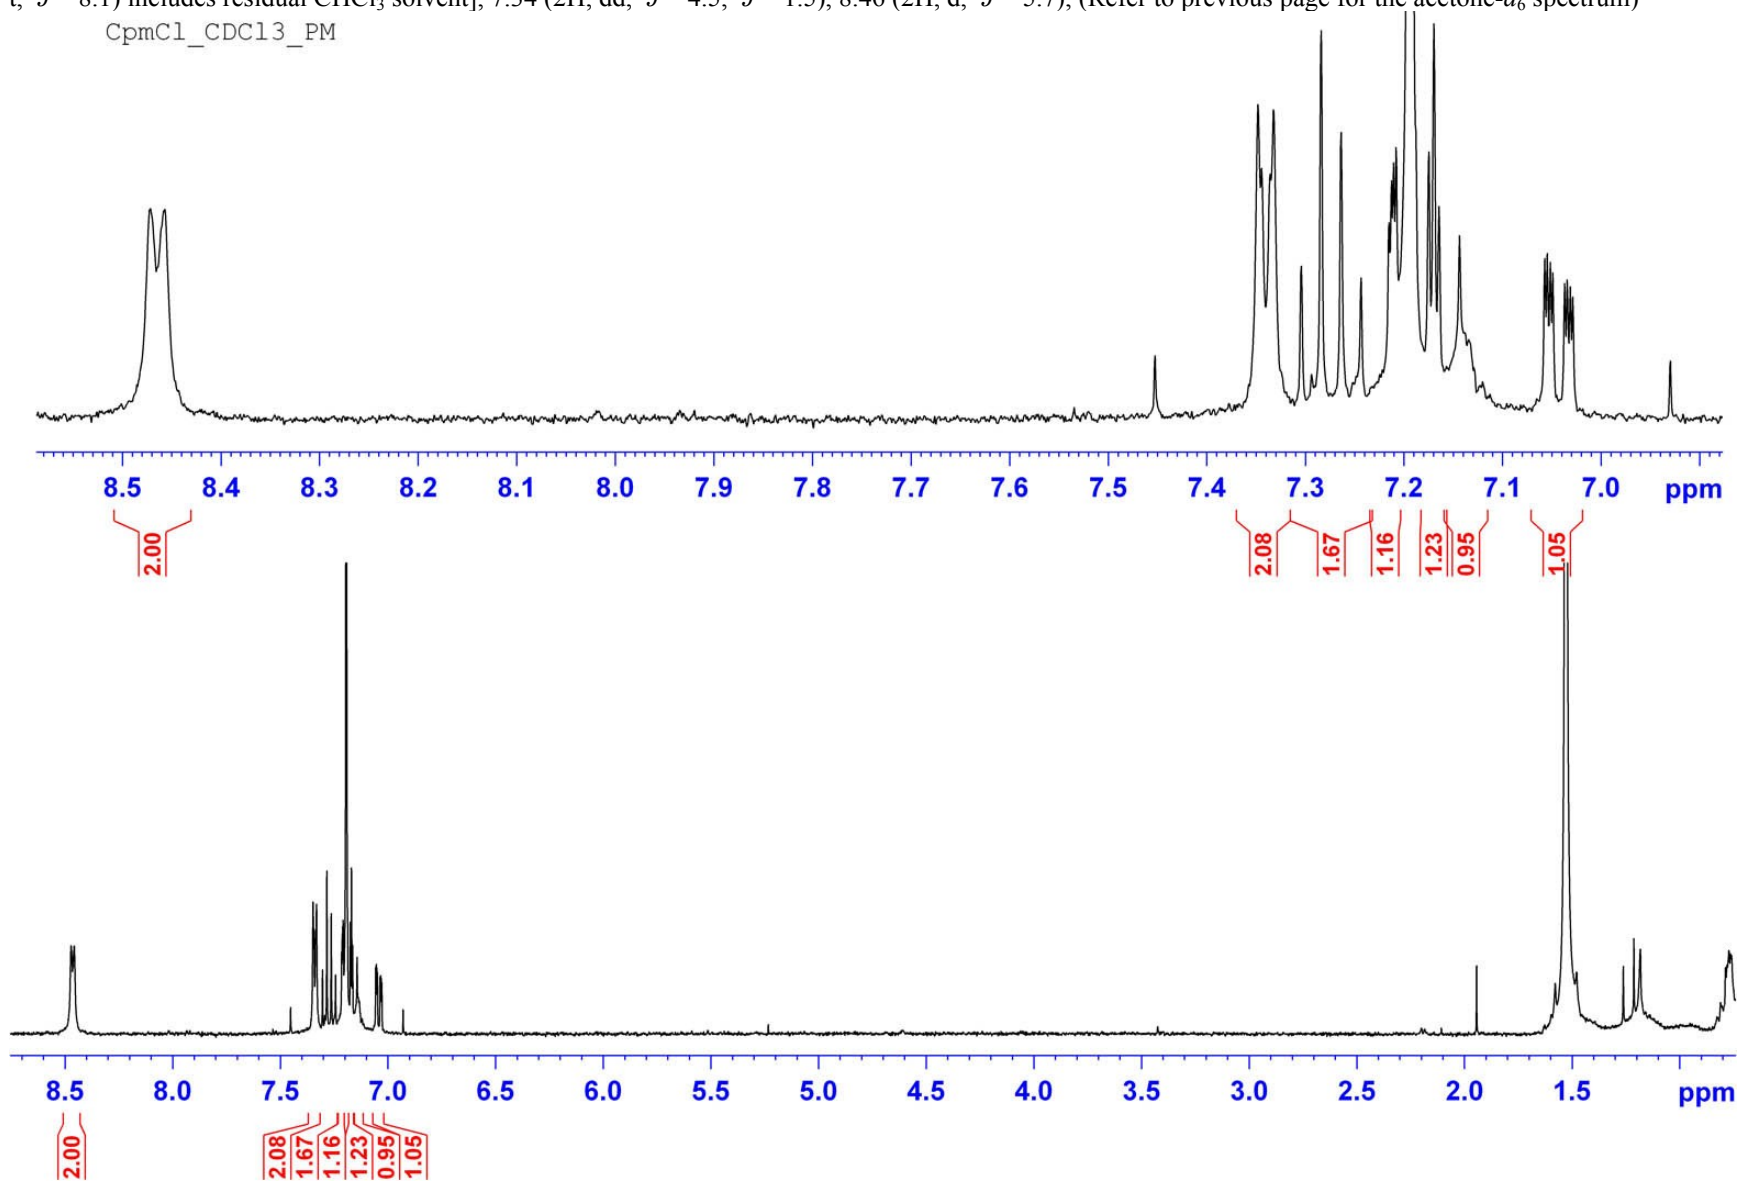

1.2.1.5. **CpoCl** (Acetone- $d_6$ ):  $\delta$  7.35 (1H, ddd,  $^3J=8.0$ ,  $^4J=6.6$ ,  $^5J=2.5$ ), 7.43 (2H, m), 7.57 (1H, dd,  $^3J=8.0$ ,  $^4J=1.0$ ), 7.59 (2H, dd,  $^3J=5.2$ ,  $^4J=1.6$ ), 8.5 (2H, dd,  $^3J=4.8$ ,  $^4J=1.5$ ), 9.88 (1H, br s);

CpoCl\_HNMR\_Acd6\_PM

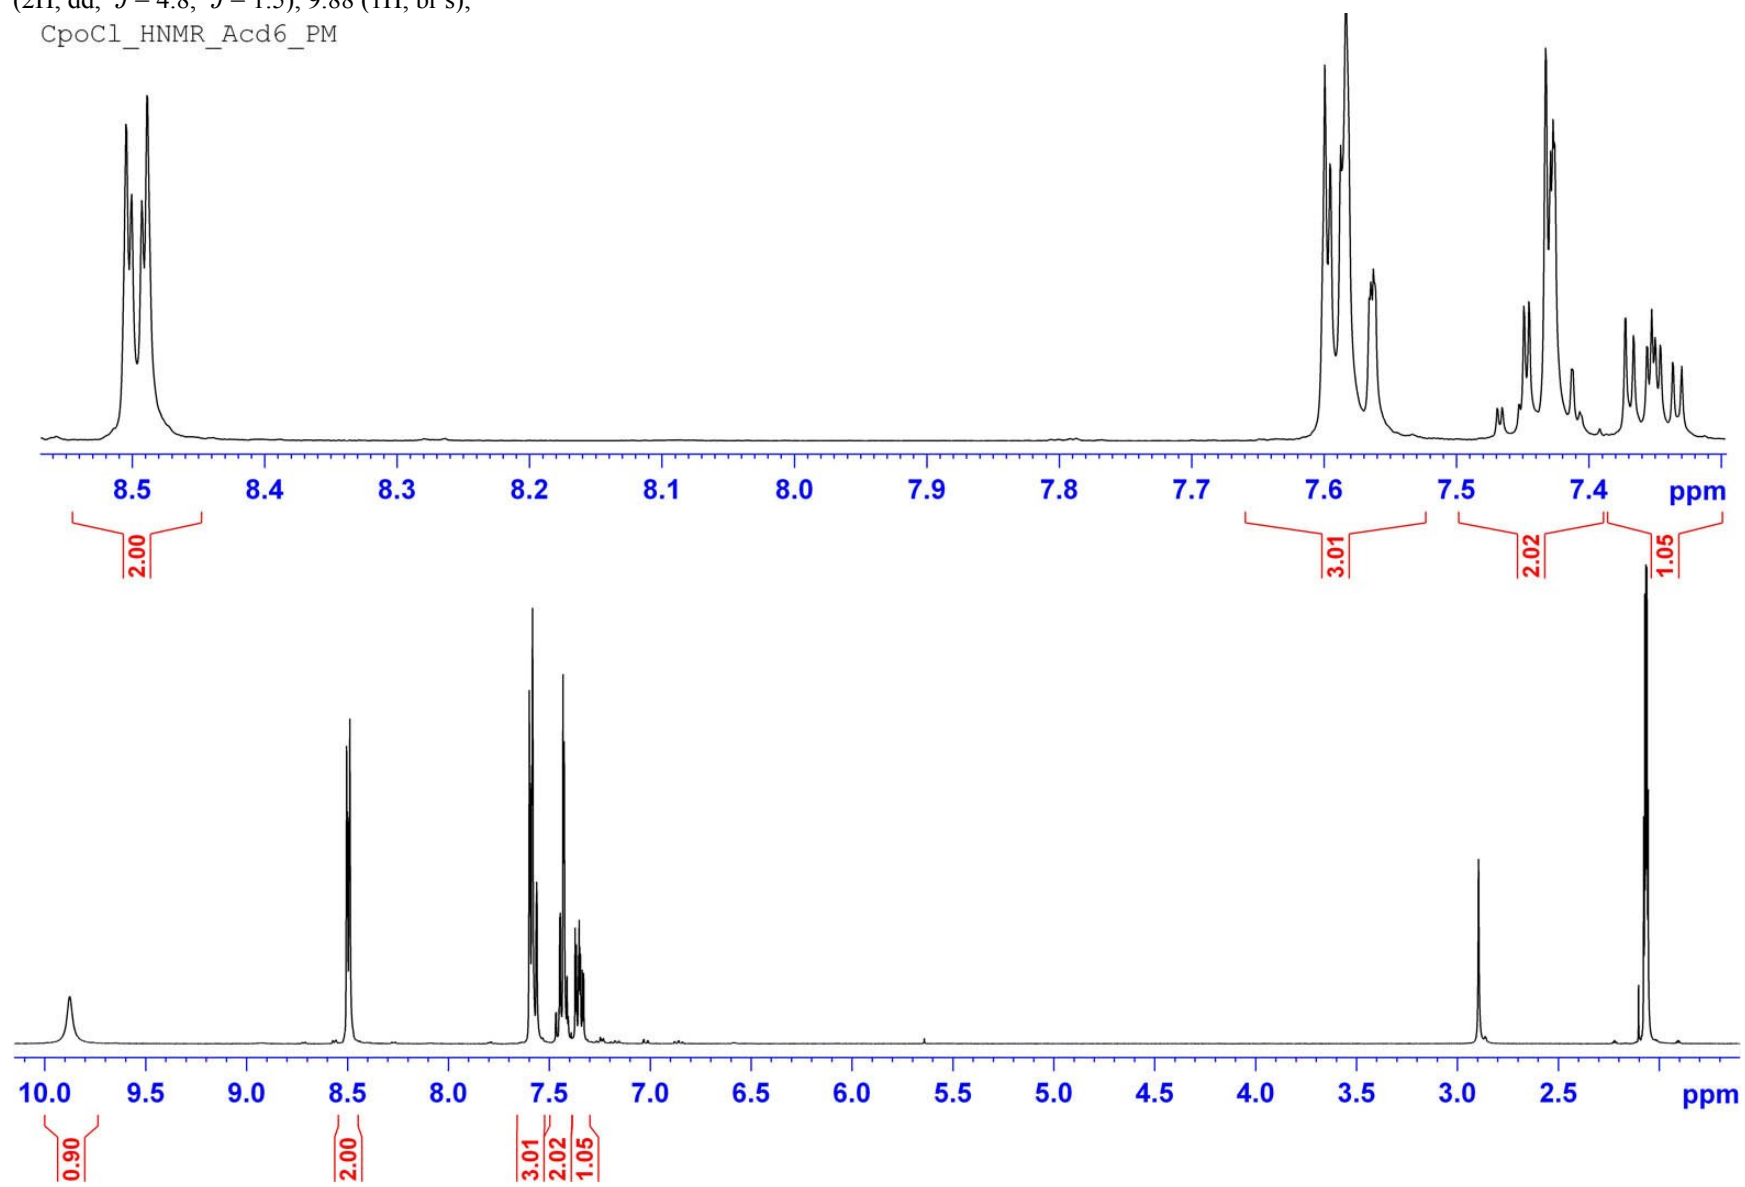

1.2.1.6. **CpoCl** (CDCl<sub>3</sub>) δ 7.19 (2H, m), 7.26 (1H, ddd, <sup>3</sup>J = 8.8, <sup>4</sup>J = 7.0, <sup>5</sup>J = 1.6; includes residual CHCl<sub>3</sub> solvent), 7.40 (1H, dd, <sup>3</sup>J = 7.7, <sup>4</sup>J = 1.6), 7.44 (2H, dd, <sup>3</sup>J = 4.8, <sup>4</sup>J = 1.4), 8.04 (1H, br s), 8.45 (2H, dd, <sup>3</sup>J = 4.8, <sup>4</sup>J = 1.0);

CpoCl\_CDCl3\_PM

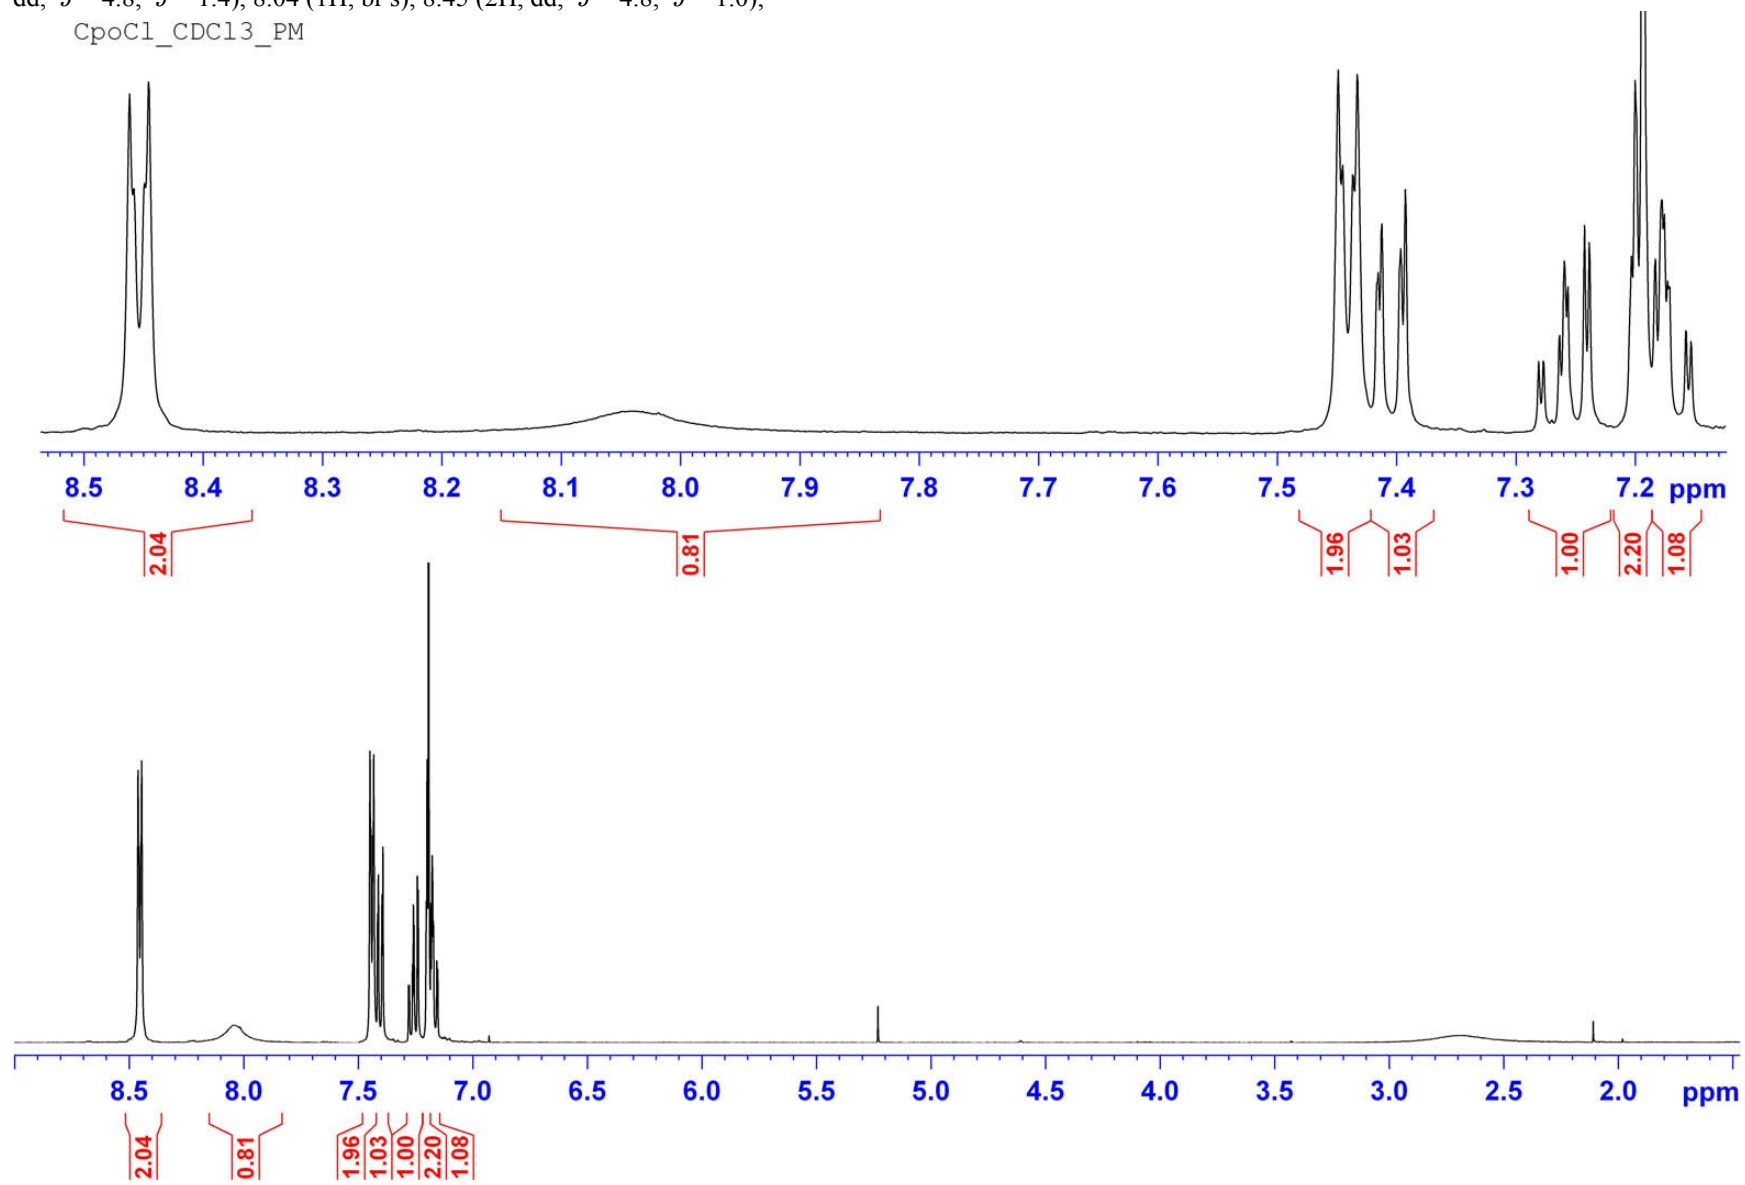



1.2.1.7. **CmpCl** (Acetone- $d_6$ ):  $\delta$  7.30 (2H, dt,  $^3J=8.9$ ,  $^4J=2.7$ ), 7.37 (1H, dd,  $^3J=8.4$ ,  $^4J=4.7$ ), 7.47 (2H, dt,  $^3J=9.0$ ,  $^4J=2.8$ ), 8.07 (1H, ddd,  $^3J=8.3$ ,  $^4J=3$ ,  $^5J=1.4$ ), 8.33 (1H, dd,  $^3J=4.7$ ,  $^4J=1.4$ ), 8.78 (1H, d,  $^3J=2.5$ ), 9.48 (1H, br s);

CmpCl\_Acd6\_PM

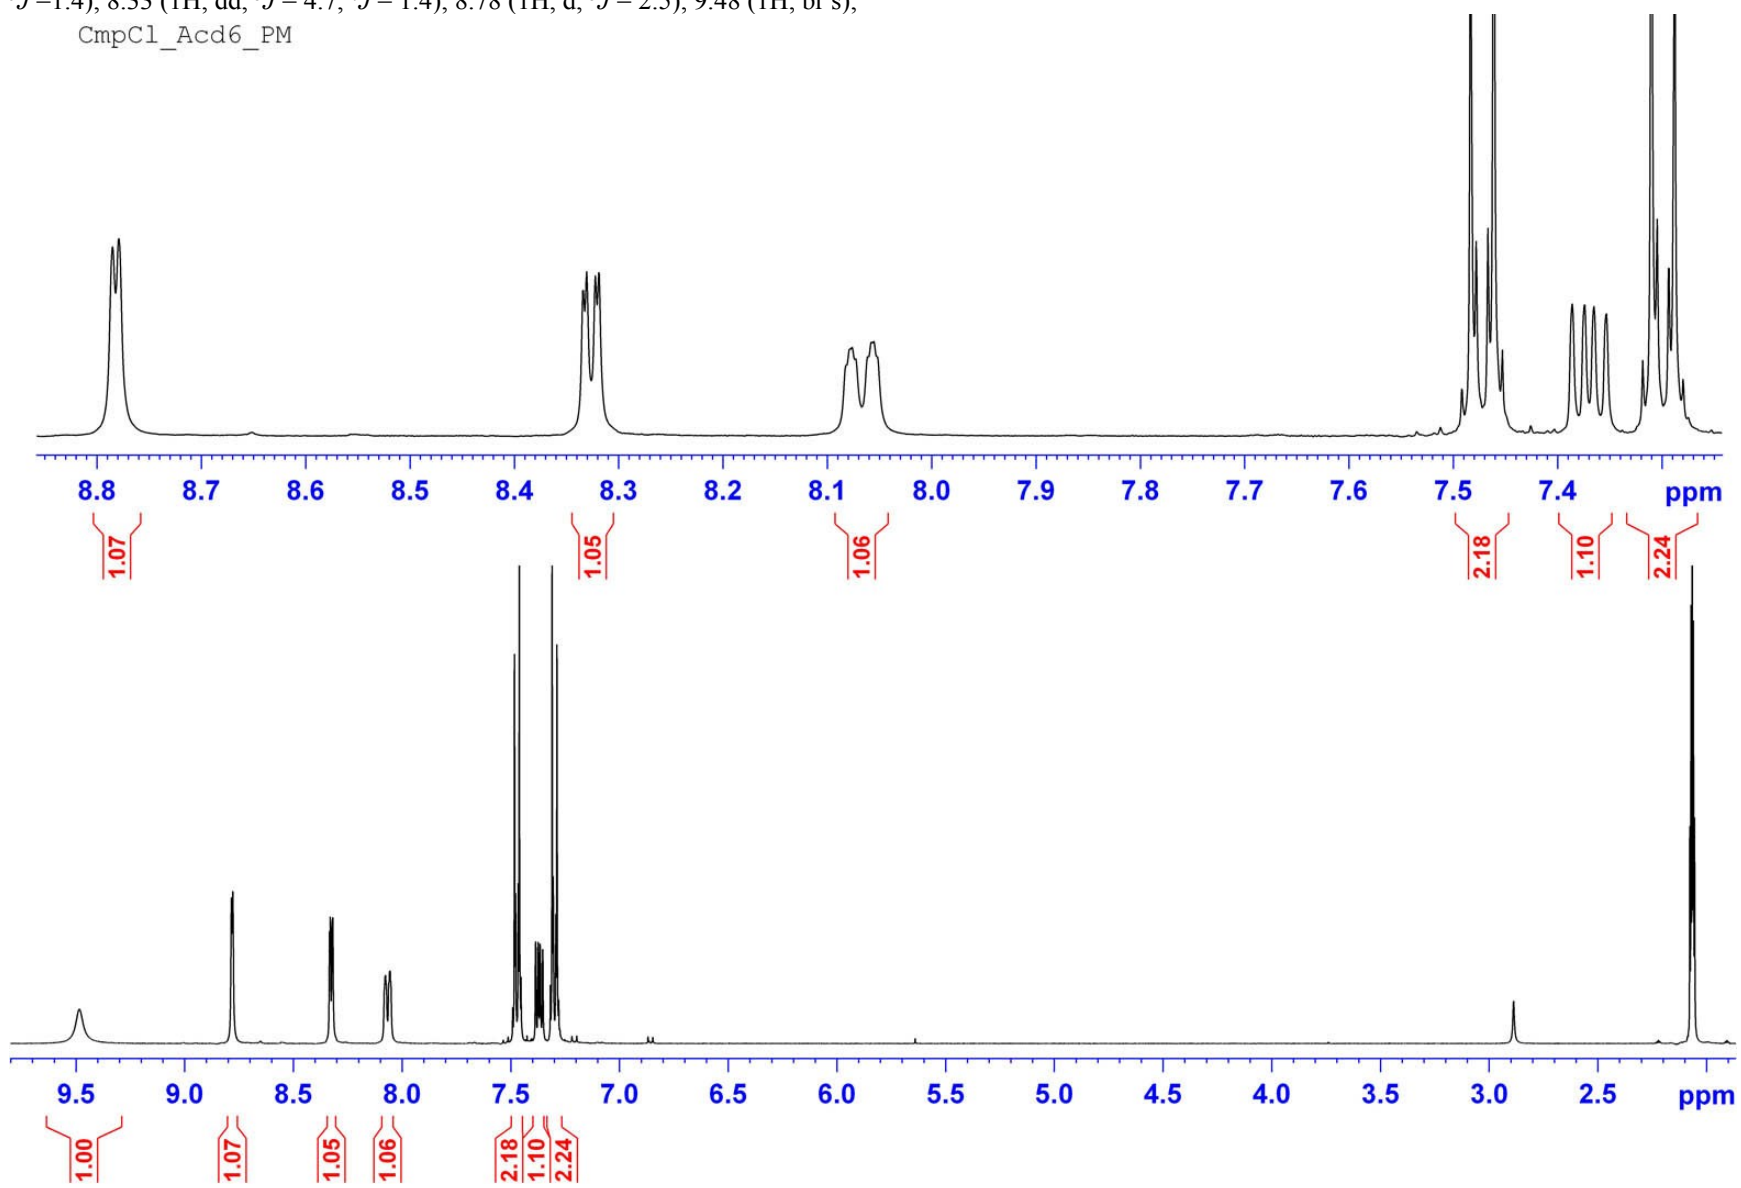

1.2.1.8. **CmpCl** (CDCl<sub>3</sub>) δ 7.08 (2H, dt, <sup>3</sup>J = 8.9, <sup>4</sup>J = 2.7), 7.27 (1H, dd, <sup>3</sup>J = 8.2, <sup>4</sup>J = 4.8), 7.30 (2H, dt, <sup>3</sup>J = 8.9, <sup>4</sup>J = 2.7), 7.49 (1H, br s), 8.04 (1H, d, <sup>3</sup>J = 7), 8.31 (1H, d, <sup>3</sup>J = 3.4), 8.57 (1H, s);

CmpCl\_CDC13\_PM

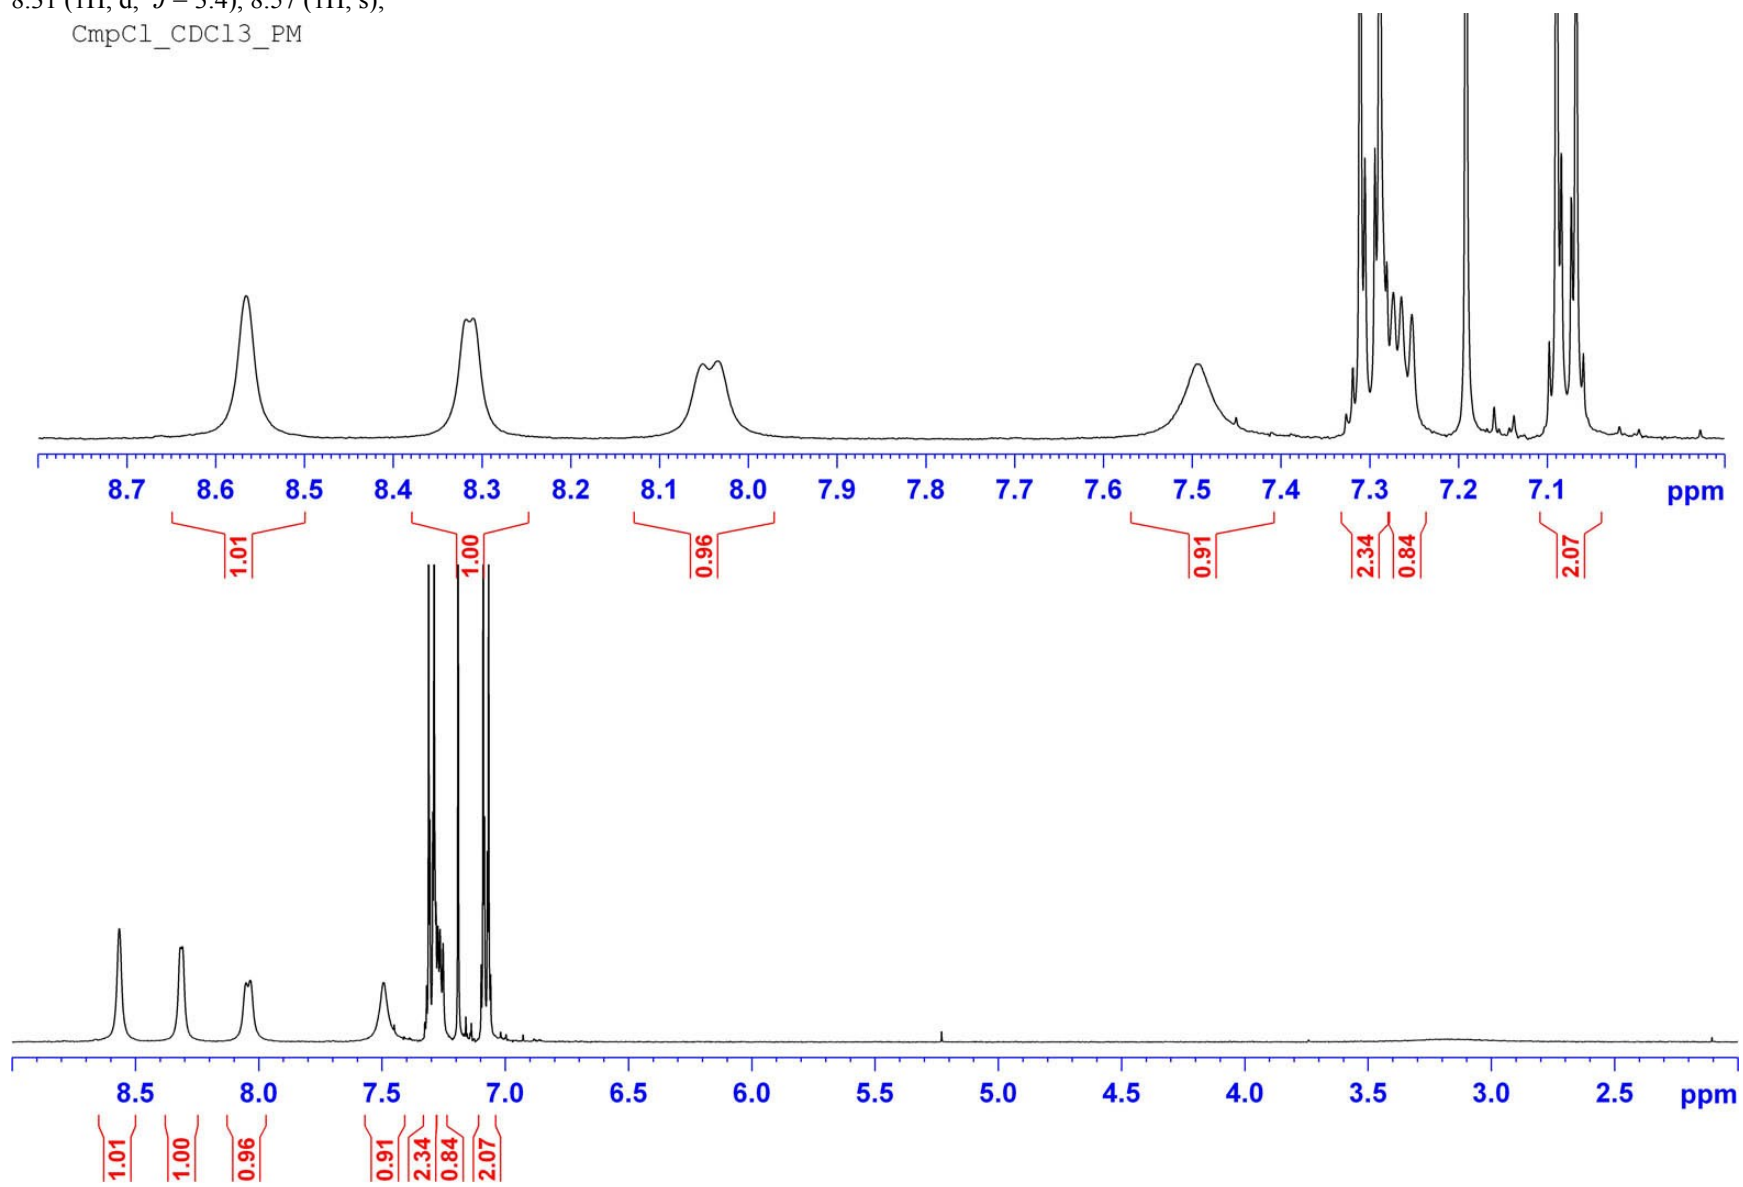

1.2.1.9. **CmmCl** (600 MHz, Acetone- $d_6$ ):  $\delta$  7.25 (1H, ddd,  $^3J=8.3$ ,  $^4J=2.2$ ,  $^5J=0.8$ ), 7.34 (1H, ddd,  $^3J=8.2$ ,  $^4J=1.8$ ,  $^5J=0.8$ ), 7.38 (2H, m), 7.48 (1H, t,  $^3J=8.1$ ), 8.08 (1H, d,  $^3J=8.1$ ), 8.34 (1H, dd,  $^3J=4.8$ ,  $^4J=1.4$ ), 8.79 (1H, d,  $^3J=2.6$ ), 9.53 (1H, br s);

CmmCl\_HNMR\_Acd6

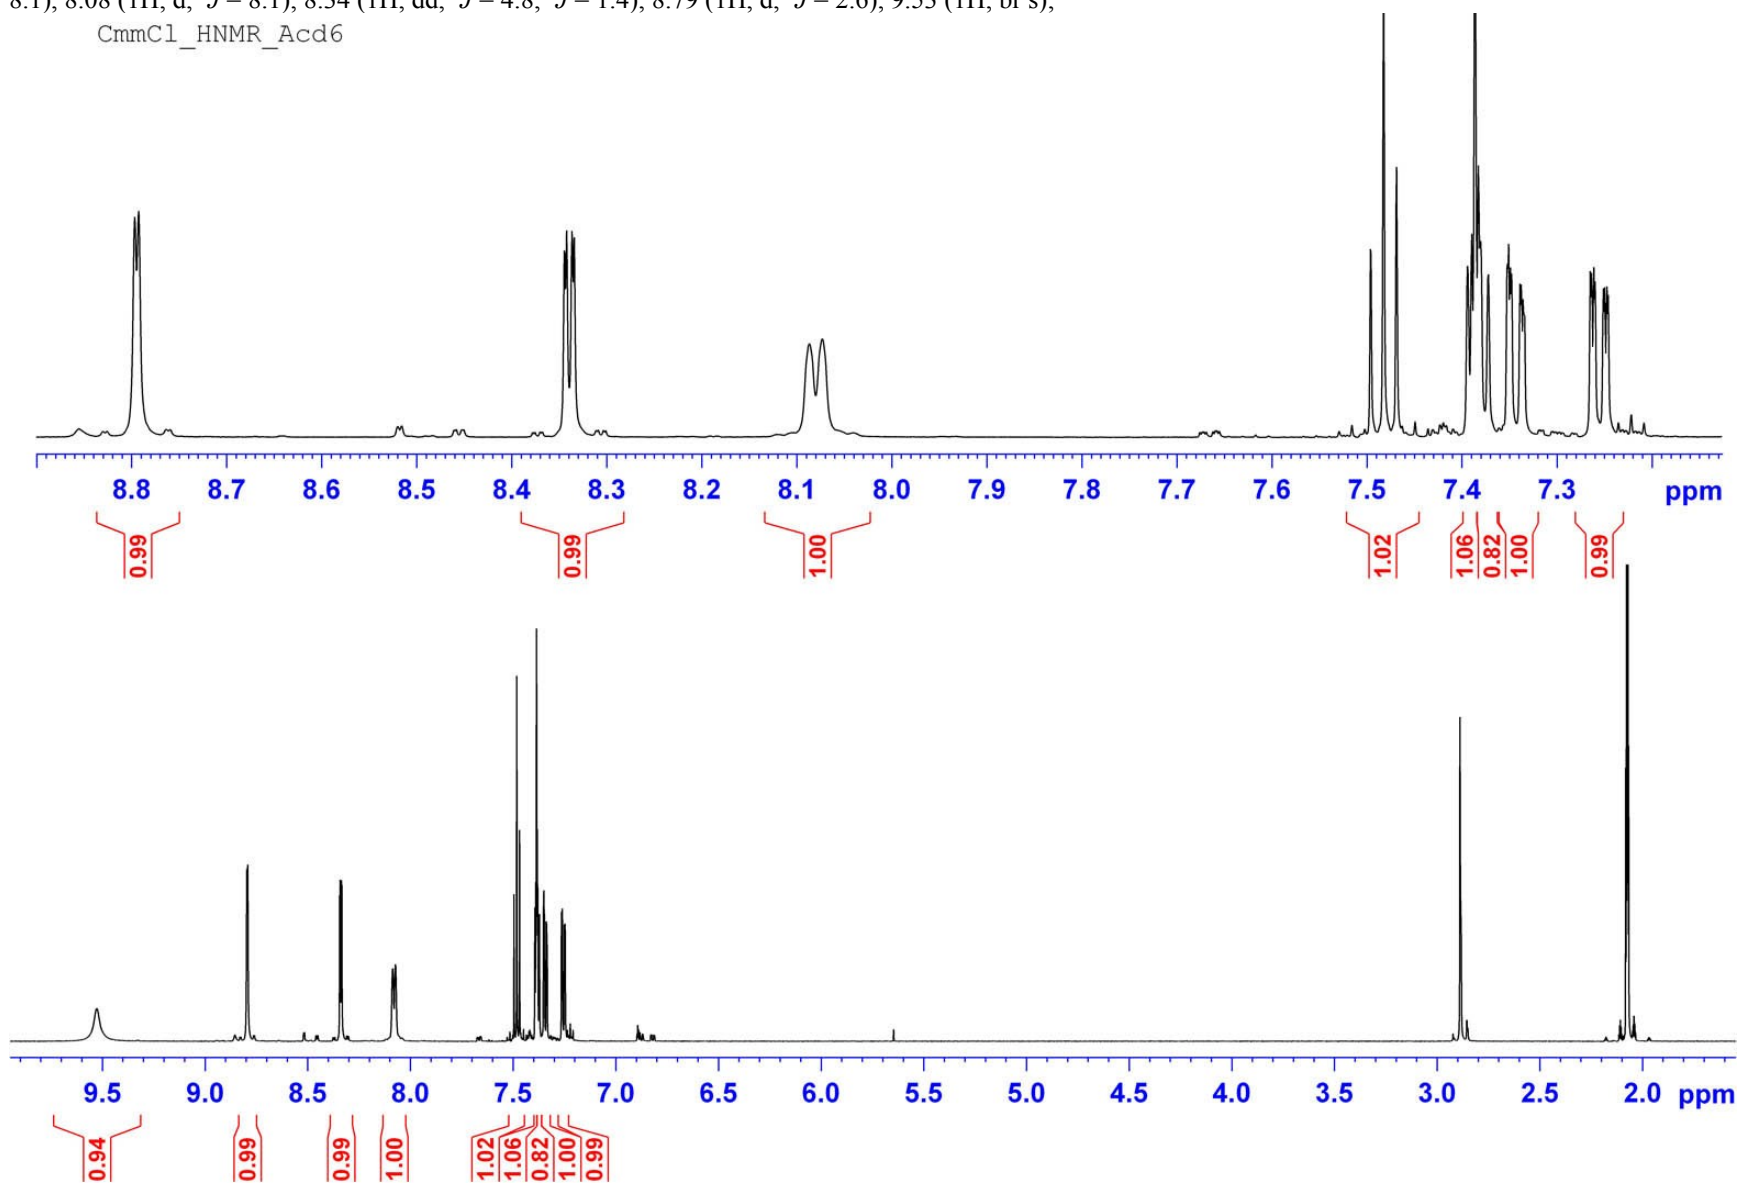

1.2.1.10. **CmmCl** (CDCl<sub>3</sub>) δ 7.05 (1H, dt, <sup>3</sup>J = 8.1, <sup>4</sup>J = 1.8), 7.18 (2H, m), 7.27 (1H, t, <sup>3</sup>J = 8.2), 7.29 (1H, m), 7.69 (1H, br s), 8.10 (1H, d, <sup>3</sup>J = 6.9), 8.3 (1H, d, <sup>3</sup>J = 4.5), 8.61 (1H, s);

CmmCl\_CDCl3\_PM

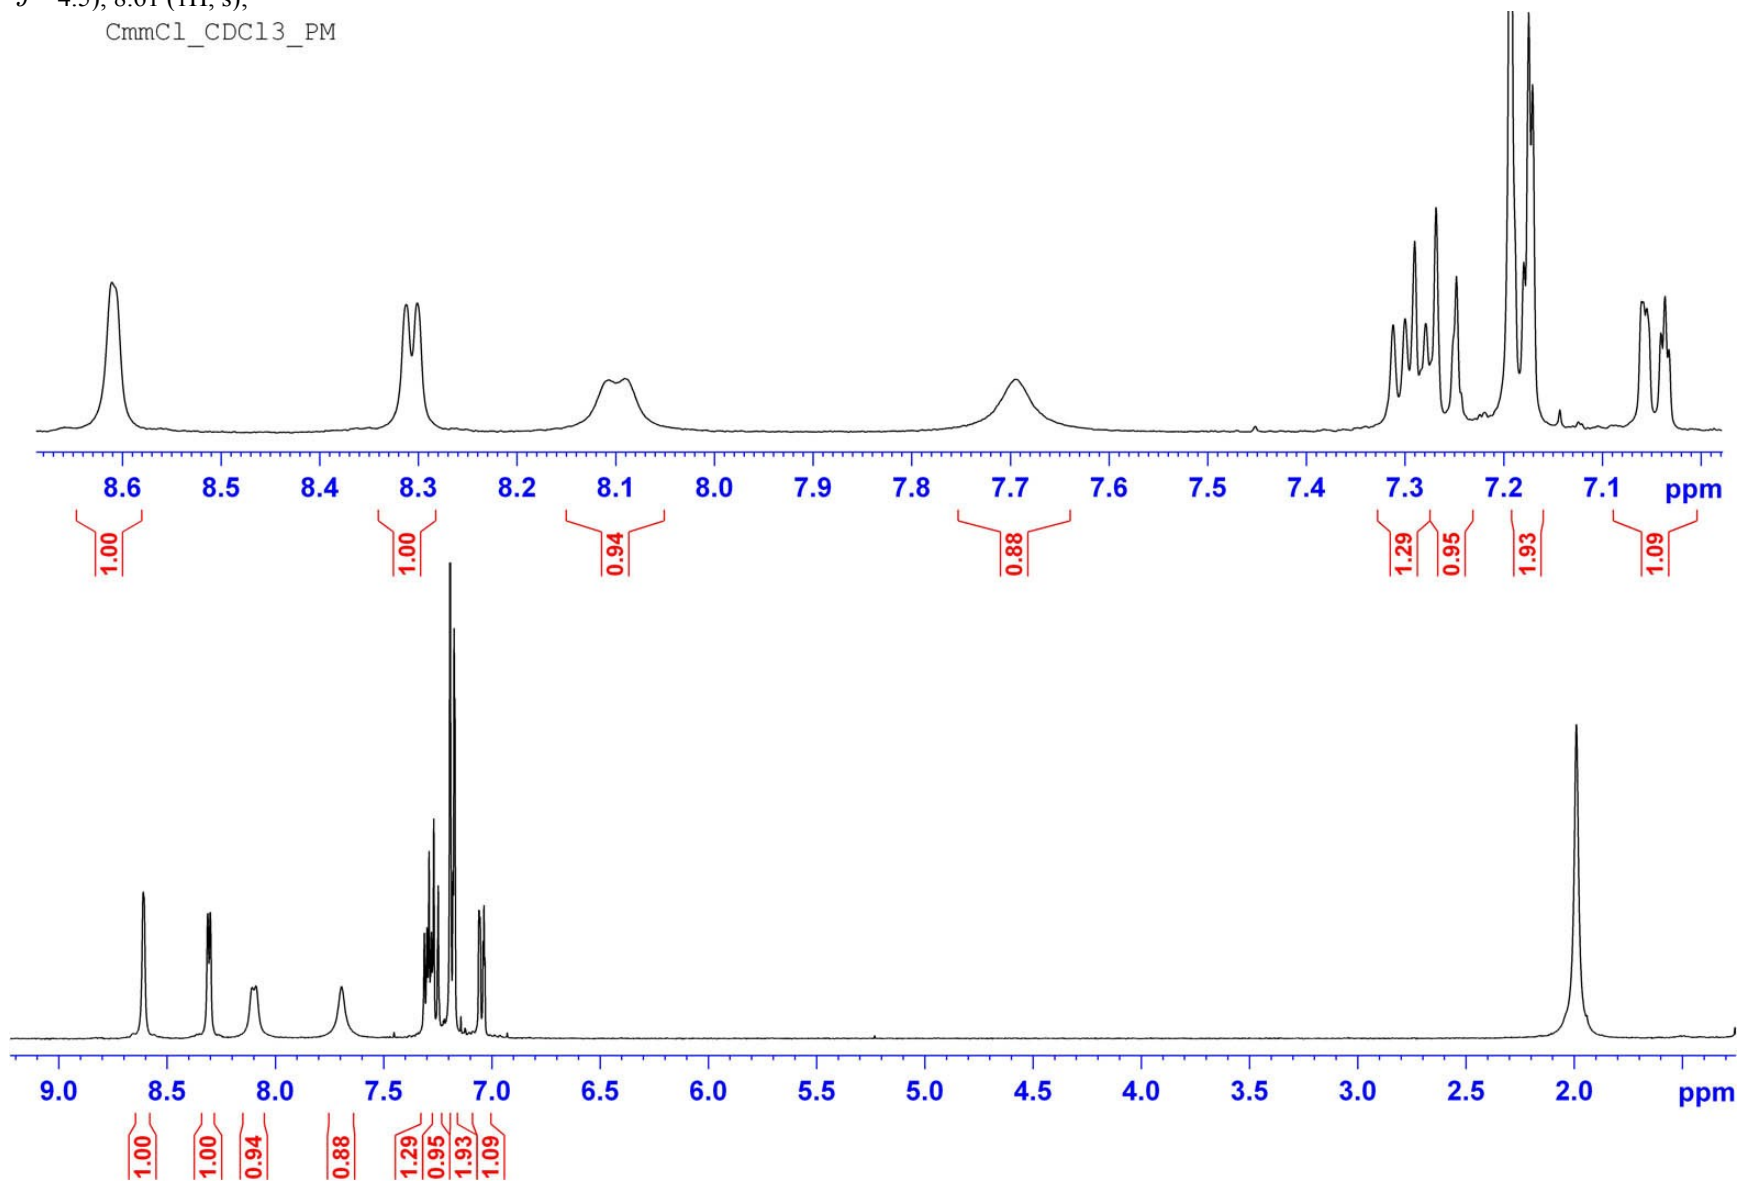

1.2.1.11. **CmoCl** (Acetone- $d_6$ ):  $\delta$  7.34 (1H, ddd,  $^3J=8.2$ ,  $^4J=6.6$ ,  $^5J=2.5$ ), 7.38 (1H, dd,  $^3J=8.5$ ,  $^4J=4.7$ ), 7.42 (1H, d,  $^3J=2.2$ ), 7.44 (1H, td,  $^3J=8.0$ ,  $^4J=1.7$ ), 7.56 (1H, dd,  $^3J=8.0$ ,  $^4J=1.4$ ), 8.08 (1H, d,  $^3J=8.2$ ), 8.34 (1H, dd,  $^3J=4.6$ ,  $^4J=1.3$ ), 8.80 (1H, d,  $^3J=2.5$ ), 9.67 (1H, br s);

CmoCl\_HNMR\_Acd6\_PM

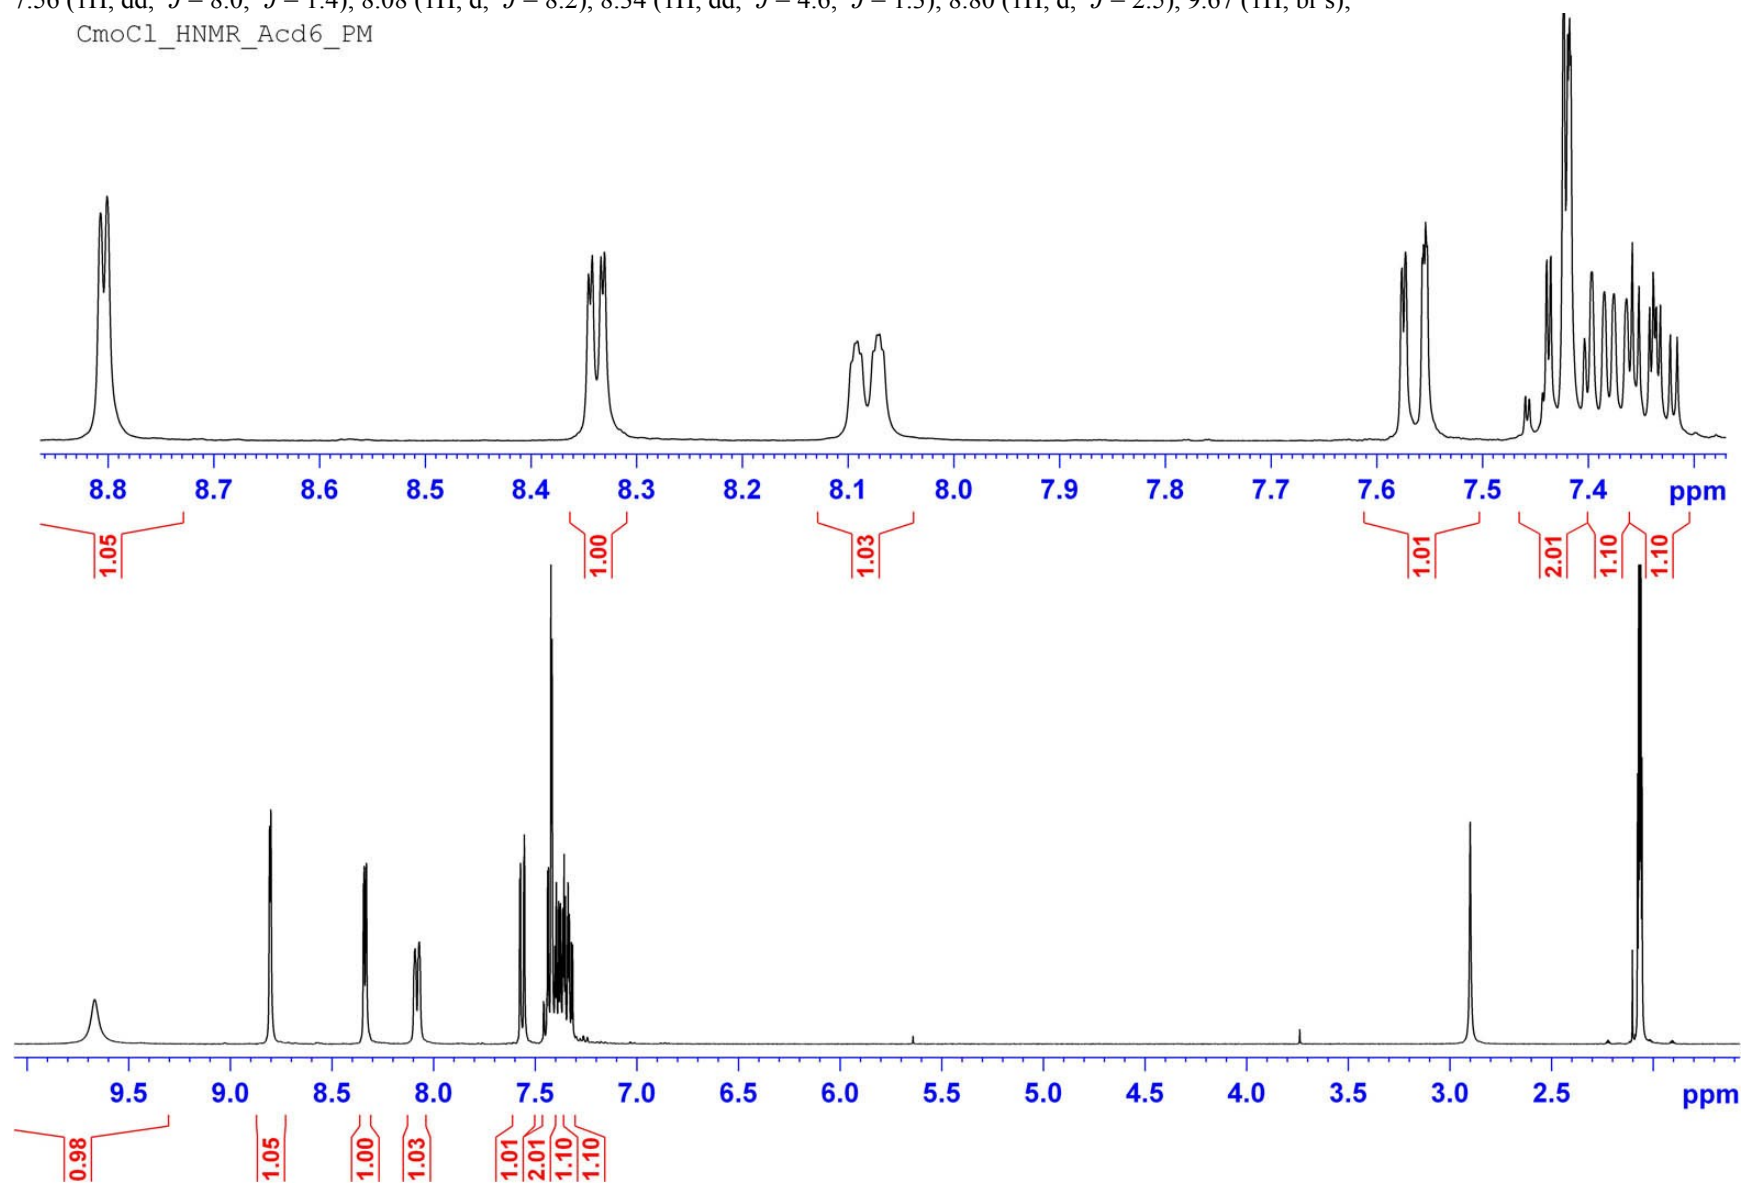

1.2.1.12. **CmoCl** (CDCl<sub>3</sub>)  $\delta$  7.24 (1H, ddd, <sup>3</sup>J = 8.0, <sup>4</sup>J = 7.0, <sup>5</sup>J = 2.0), 7.29 (1H, m), 7.34 (2H, m), 7.49 (1H, dd, <sup>3</sup>J = 7.9, <sup>4</sup>J = 1.4), 8.18 (1H, d, <sup>3</sup>J = 7.3), 8.40 (1H, br s), 8.42 (1H, d, <sup>3</sup>J = 3.5), 8.67 (1H, s);

CmoCl\_CDCl3\_PM

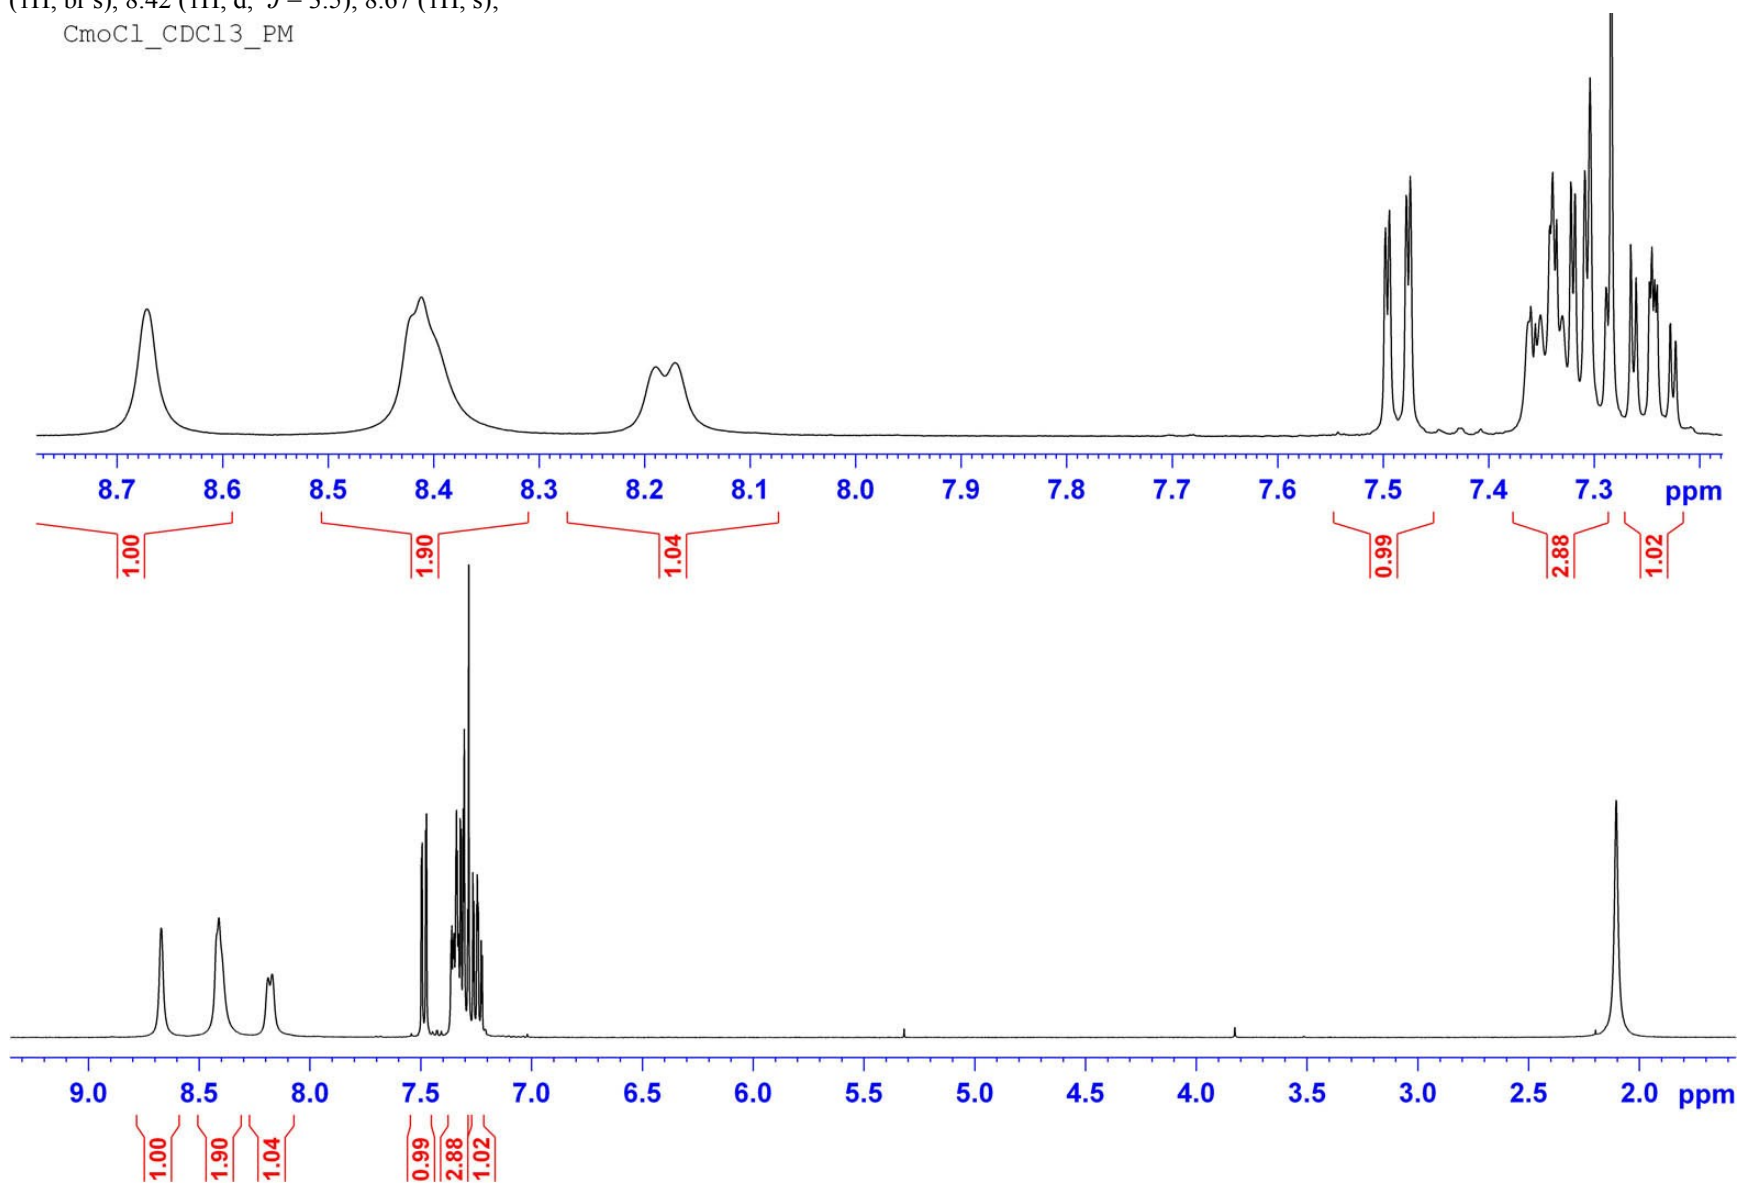

1.2.1.13. **CopCl** (Acetone- $d_6$ ):  $\delta$  7.08 (1H, ddd,  $^3J=7.4$ ,  $^4J=4.9$ ,  $^5J=0.9$ ), 7.27 (2H, dt,  $^3J=8.8$ ,  $^4J=2.5$ ), 7.44 (2H, dt,  $^3J=8.9$ ,  $^4J=2.5$ ), 7.78 (1H, ddd,  $^3J=8.7$ ,  $^4J=7.2$ ,  $^5J=1.8$ ), 7.92 (1H, dt,  $^3J=8.4$ ,  $^4J=0.8$ ), 8.29 (1H, ddd,  $^3J=4.8$ ,  $^4J=2.0$ ,  $^5J=1.0$ ), 9.53 (1H, br s);

CopCl\_HNMR\_Acd6\_PM

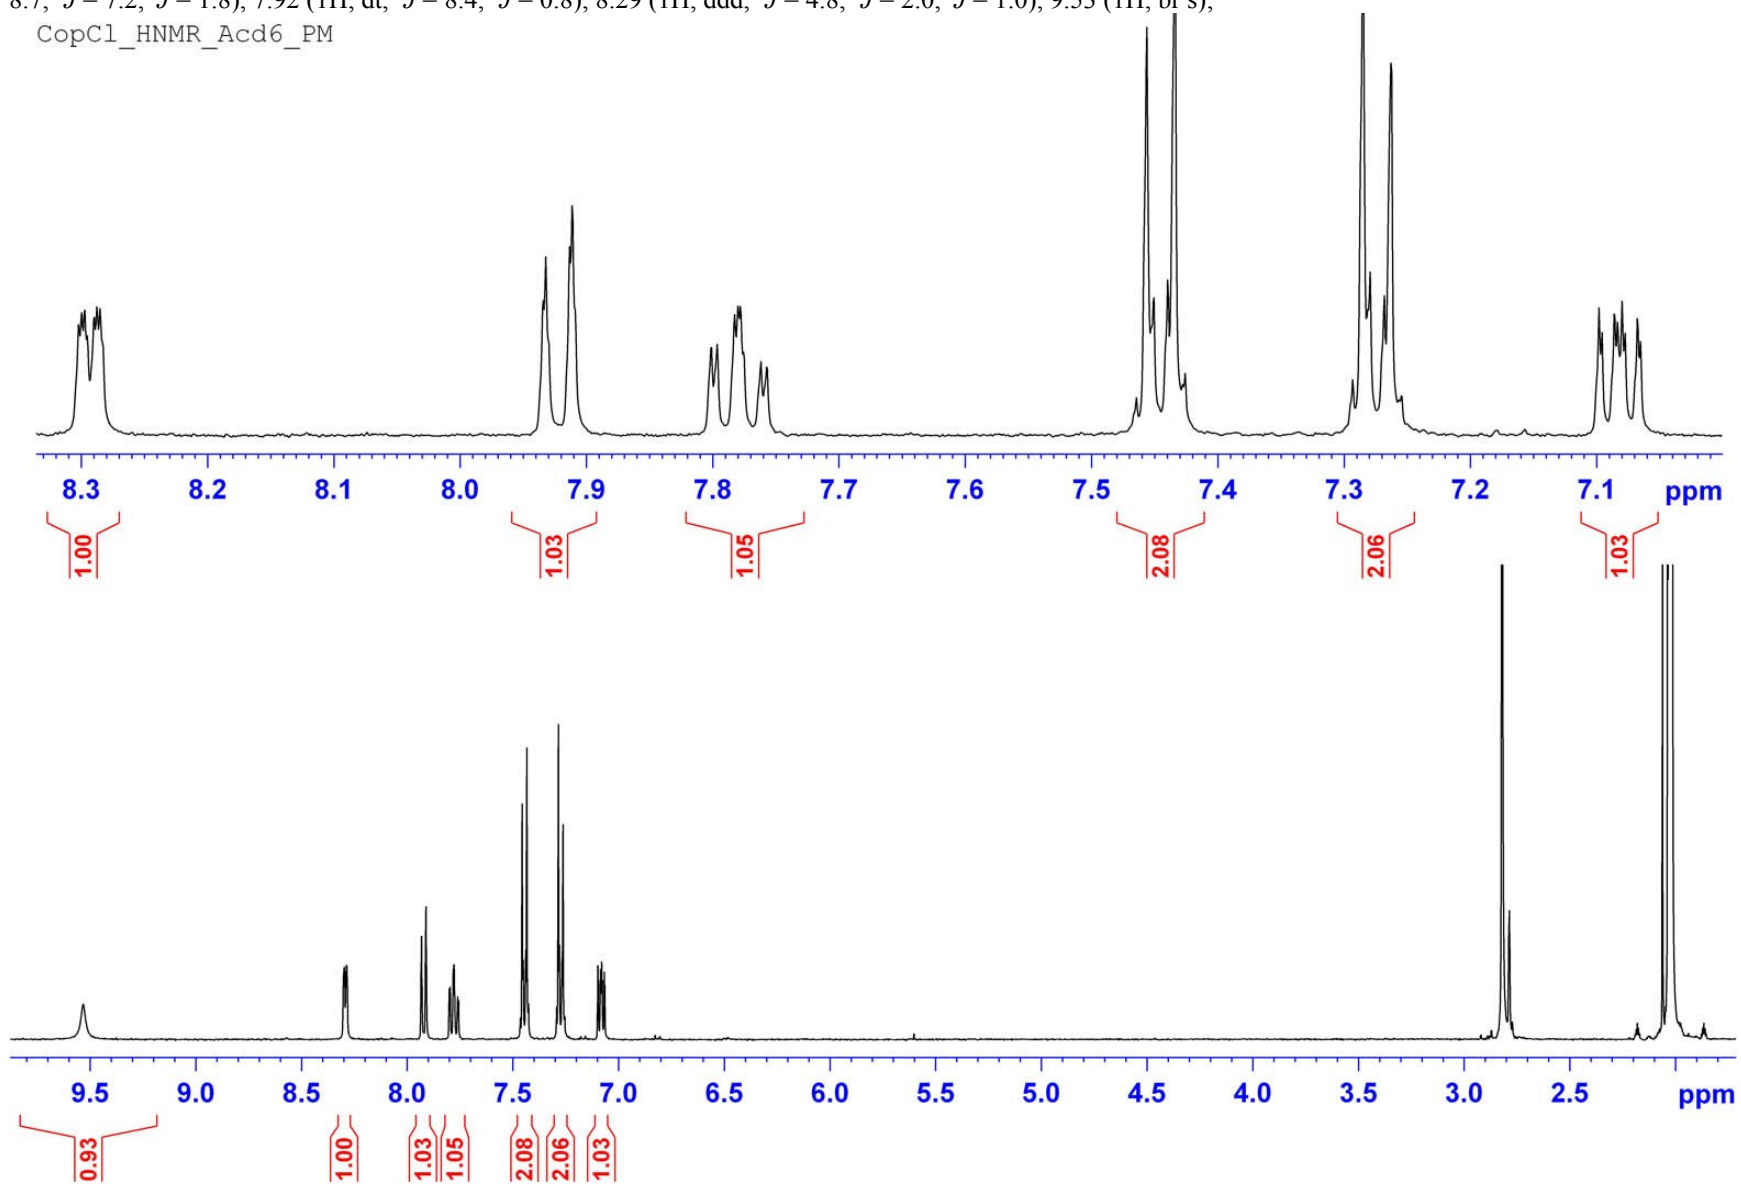

1.2.1.14. **CopCl** (CDCl<sub>3</sub>) δ 7.11 (1H, ddd, <sup>3</sup>J = 7.7, <sup>4</sup>J = 5.2, <sup>5</sup>J = 0.8), 7.19 (2H, dt, <sup>3</sup>J = 8.9, <sup>4</sup>J = 2.5), 7.41 (2H, dt, <sup>3</sup>J = 8.8, <sup>4</sup>J = 2.5), 7.81 (1H, td, <sup>3</sup>J = 8.0, <sup>4</sup>J = 1.8), 8.09 (1H, d, <sup>3</sup>J = 8.5), 8.37 (1H, d, <sup>3</sup>J = 5.0), 9.43 (1H, br s);

CopCl\_CDC13\_PM

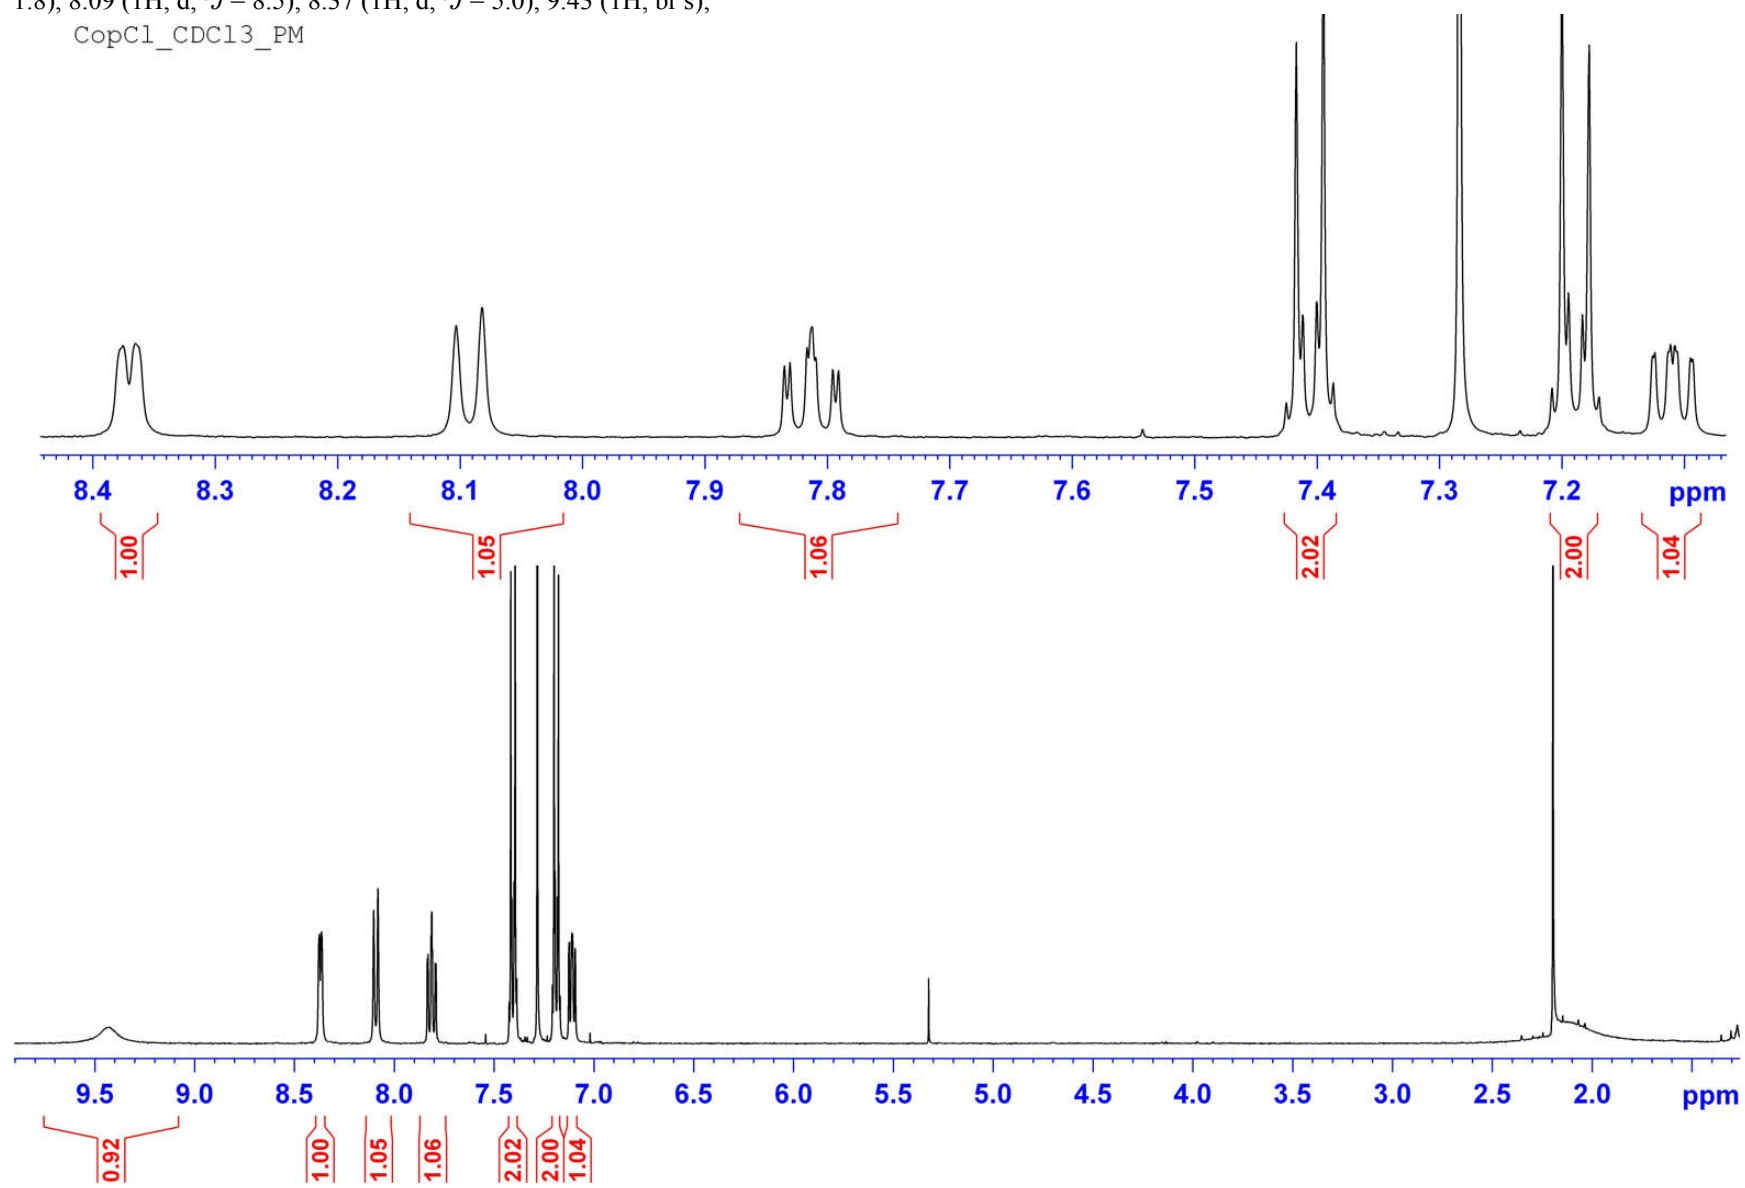



1.2.1.15. **ComCl** (Acetone- $d_6$ ):  $\delta$  6.98 (1H, ddd,  $^3J=7.7$ ,  $^4J=4.9$ ,  $^5J=0.9$ ), 7.12 (1H, ddd,  $^3J=8.3$ ,  $^4J=2.3$ ,  $^5J=0.7$ ), 7.20 (1H, ddd,  $^3J=7.9$ ,  $^4J=1.9$ ,  $^5J=0.8$ ), 7.25 (1H, t,  $^3J=2.1$ ), 7.34 (1H, t,  $^3J=8.3$ ), 7.68 (1H, ddd,  $^3J=9.1$ ,  $^4J=6.9$ ,  $^5J=2.0$ ), 7.82 (1H, d,  $^3J=8.3$ ), 8.19 (1H, ddd,  $^3J=5.0$ ,  $^4J=1.8$ ,  $^5J=0.7$ ), 9.46 (1H, br s);

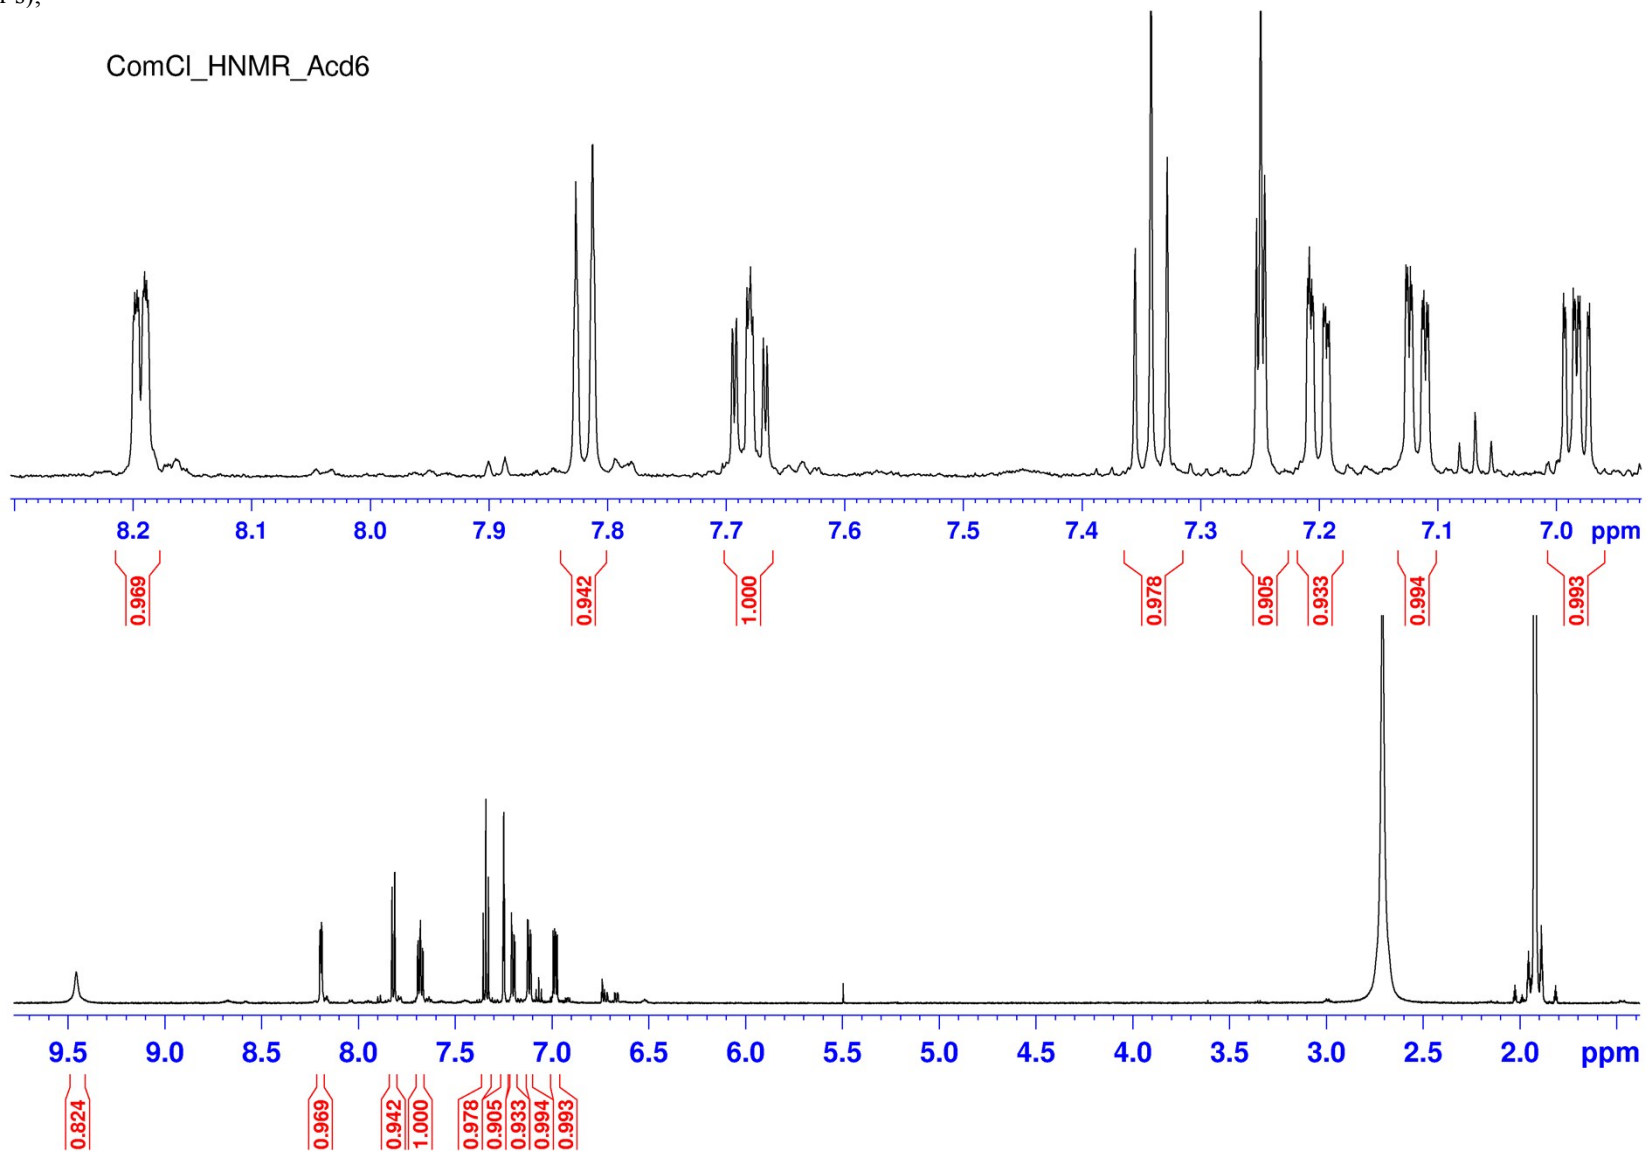

1.2.1.16. **ComCl** (CDCl<sub>3</sub>) δ 7.02 (1H, ddd, <sup>3</sup>J=7.5, <sup>4</sup>J=5.1, <sup>5</sup>J=0.9), 7.07 (1H, ddd, <sup>3</sup>J=8.2, <sup>4</sup>J=2.2, <sup>5</sup>J=1.1) 7.20 (2H, m), 7.29 (1H, t, <sup>3</sup>J=8.3), 7.72 (1H, ddd, <sup>3</sup>J=8.4, <sup>4</sup>J=7.2, <sup>5</sup>J=1.8), 8.01 (1H, d, <sup>3</sup>J=8.5), 8.30 (1H, ddd, <sup>3</sup>J=5.0, <sup>4</sup>J=1.9, <sup>5</sup>J=0.8), 9.56 (1H, br s);

ComCl\_CDC13\_PM

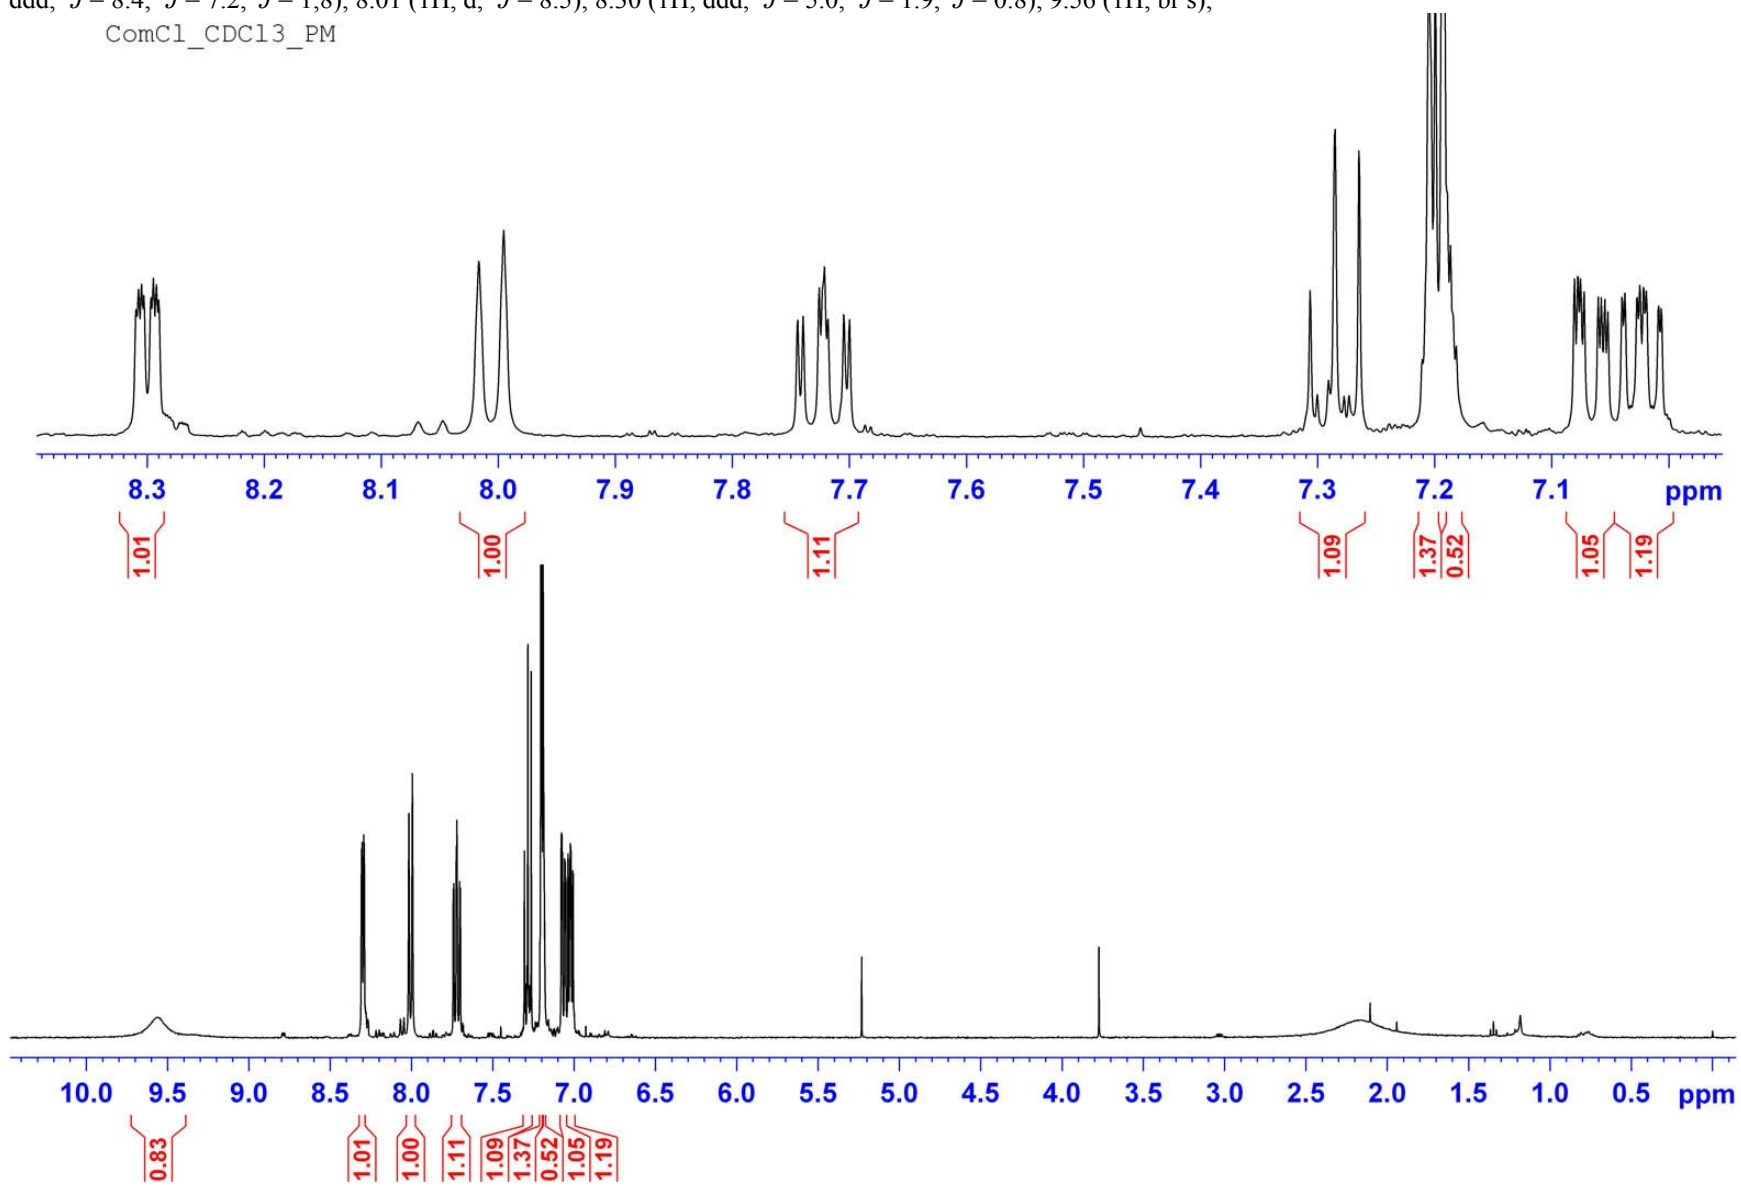

1.2.1.17. **CooCl** (Acetone- $d_6$ ):  $\delta$  7.00 (1H, ddd,  $^3J=7.3$ ,  $^4J=4.9$ ,  $^5J=0.8$ ), 7.20 (1H, ddd,  $^3J=8.0$ ,  $^4J=5.9$ ,  $^5J=2.6$ ), 7.29 (2H, m), 7.43 (1H, dd,  $^3J=8.1$ ,  $^4J=1.4$ ), 7.70 (1H, ddd,  $^3J=8.4$ ,  $^4J=7.0$ ,  $^5J=1.9$ ), 7.85 (1H, d,  $^3J=8.4$ ), 8.25 (1H, dd,  $^3J=5.1$ ,  $^4J=1.5$ ), 10.05 (1H, br s);

CooCl\_HNMR\_Acd6

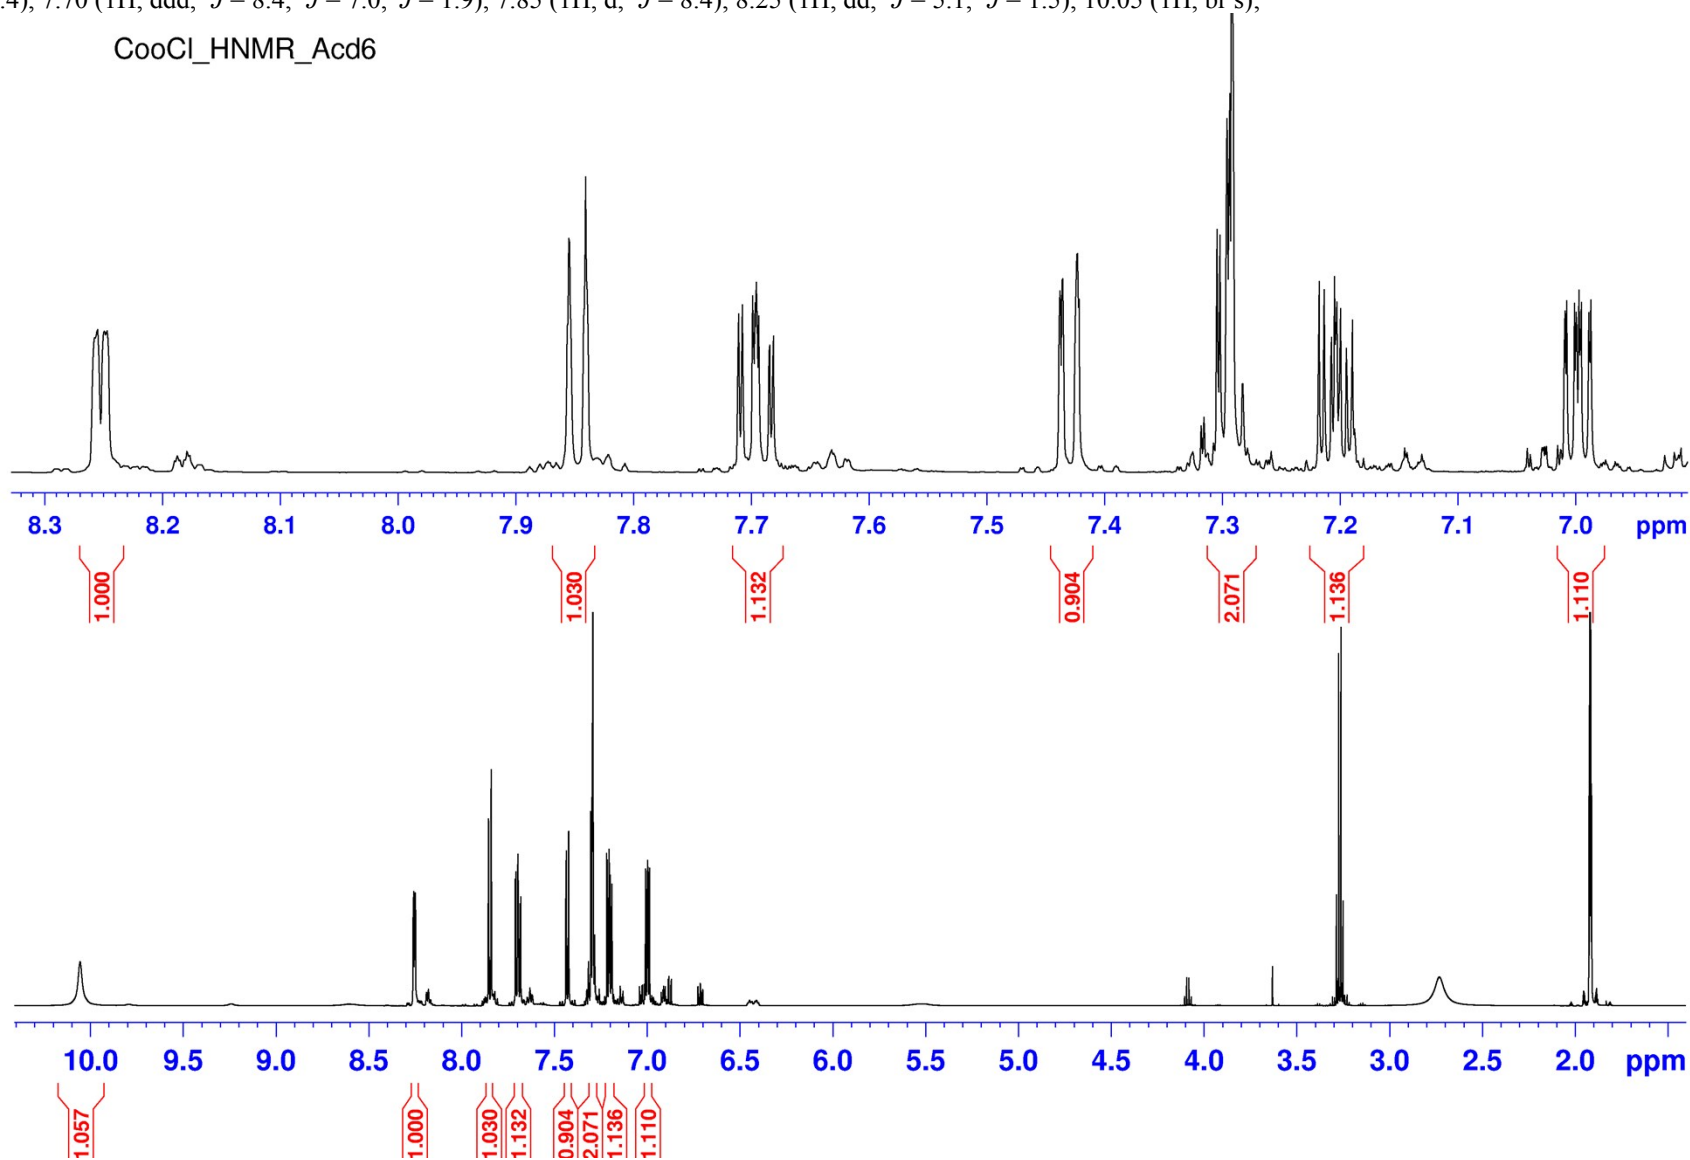

1.2.1.18. **CooCl** (CDCl<sub>3</sub>) δ 7.08 (1H, ddd, <sup>3</sup>J = 7.6, <sup>4</sup>J = 5.1, <sup>5</sup>J = 0.9), 7.27 (1H, ddd, <sup>3</sup>J = 8.5, <sup>4</sup>J = 6.4, <sup>5</sup>J = 2.1; includes residual CHCl<sub>3</sub> solvent), 7.34 (2H, m), 7.52 (1H, dd, <sup>3</sup>J = 7.9, <sup>4</sup>J = 1.4), 7.78 (1H, ddd, <sup>3</sup>J = 8.9, <sup>4</sup>J = 7.2, <sup>5</sup>J = 1.9), 8.11 (1H, d, <sup>3</sup>J = 8.3), 8.48 (1H, d, <sup>3</sup>J = 5.1), 10.50 (1H, br s);

CooCl\_HNMR\_CDCl3

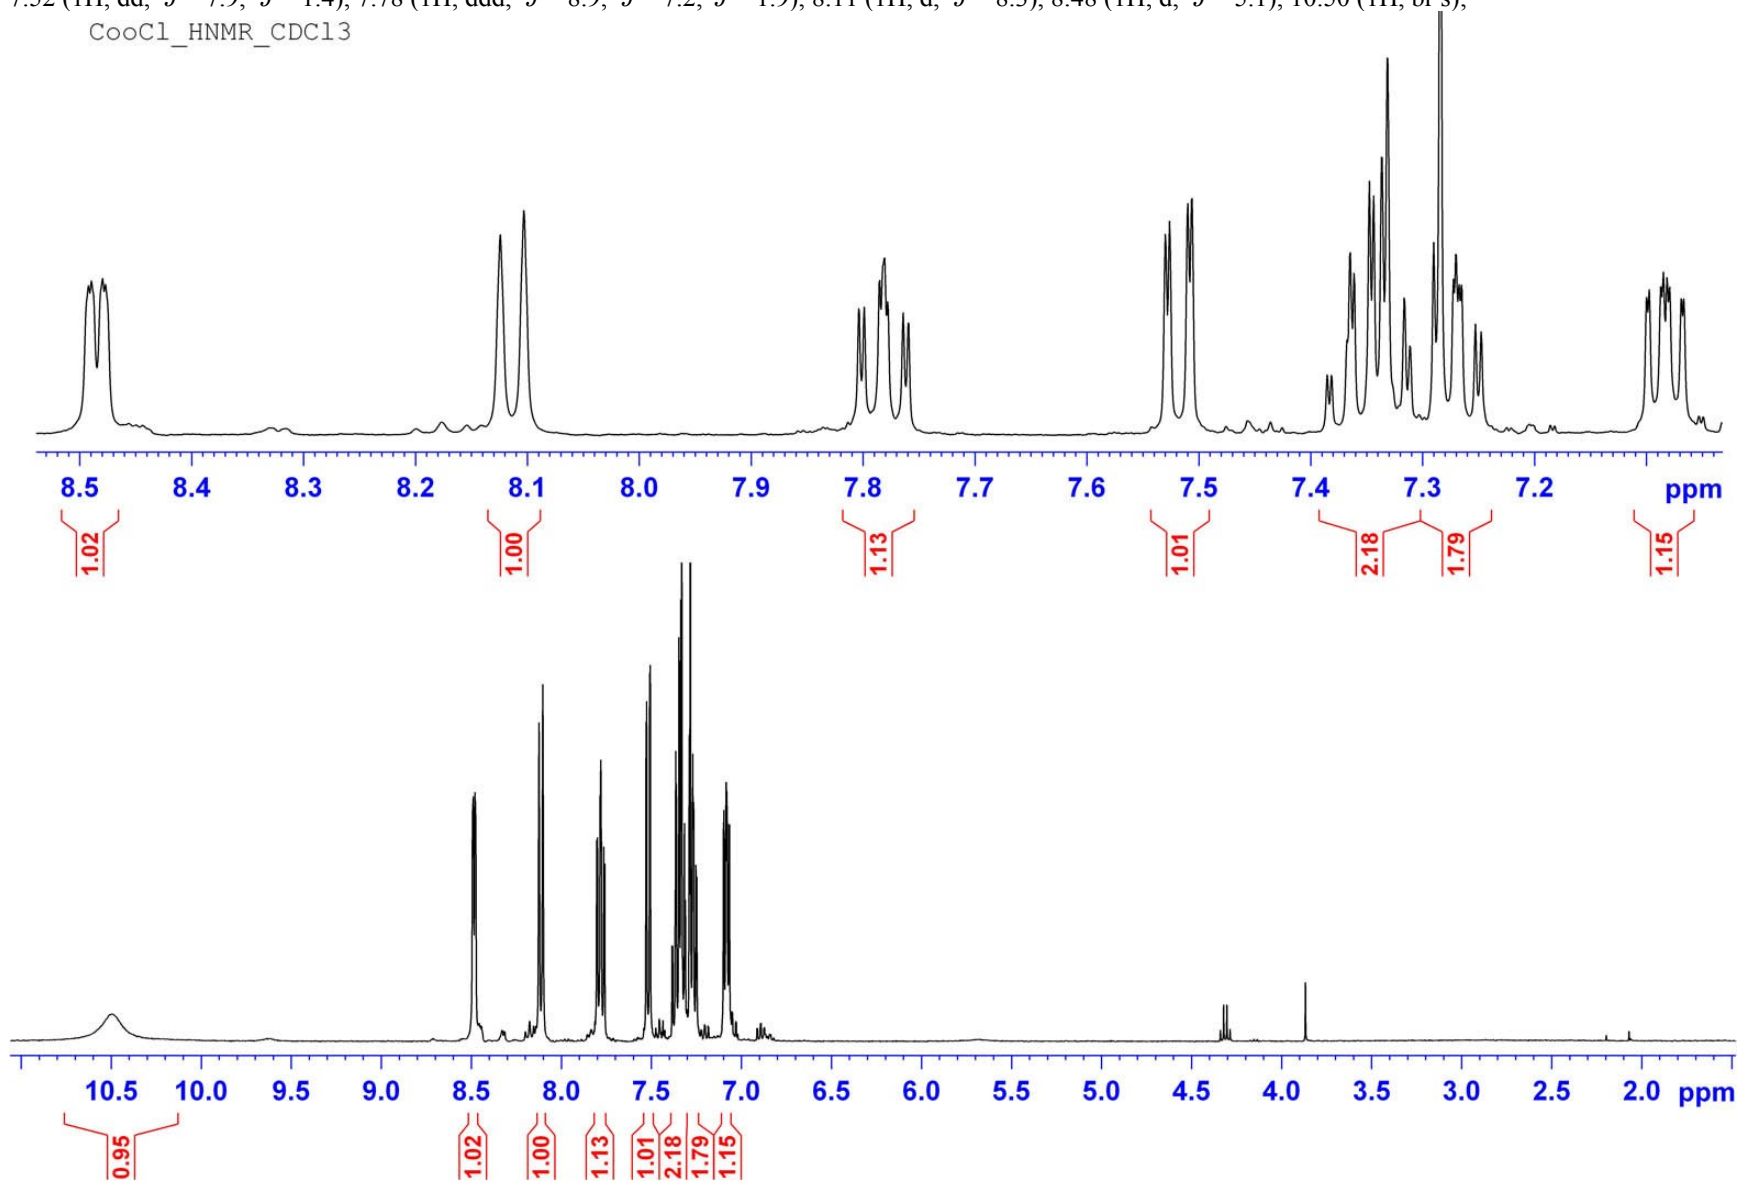

**1.2.2. <sup>13</sup>C NMR data and spectra (400 MHz, Acetone-d<sub>6</sub>)**

1.2.2.1. CppCl: δ 113.43/113.50, 124.48, 130.08/130.23, 131.39, 146.52, 150.36, 151.48, 152.05;

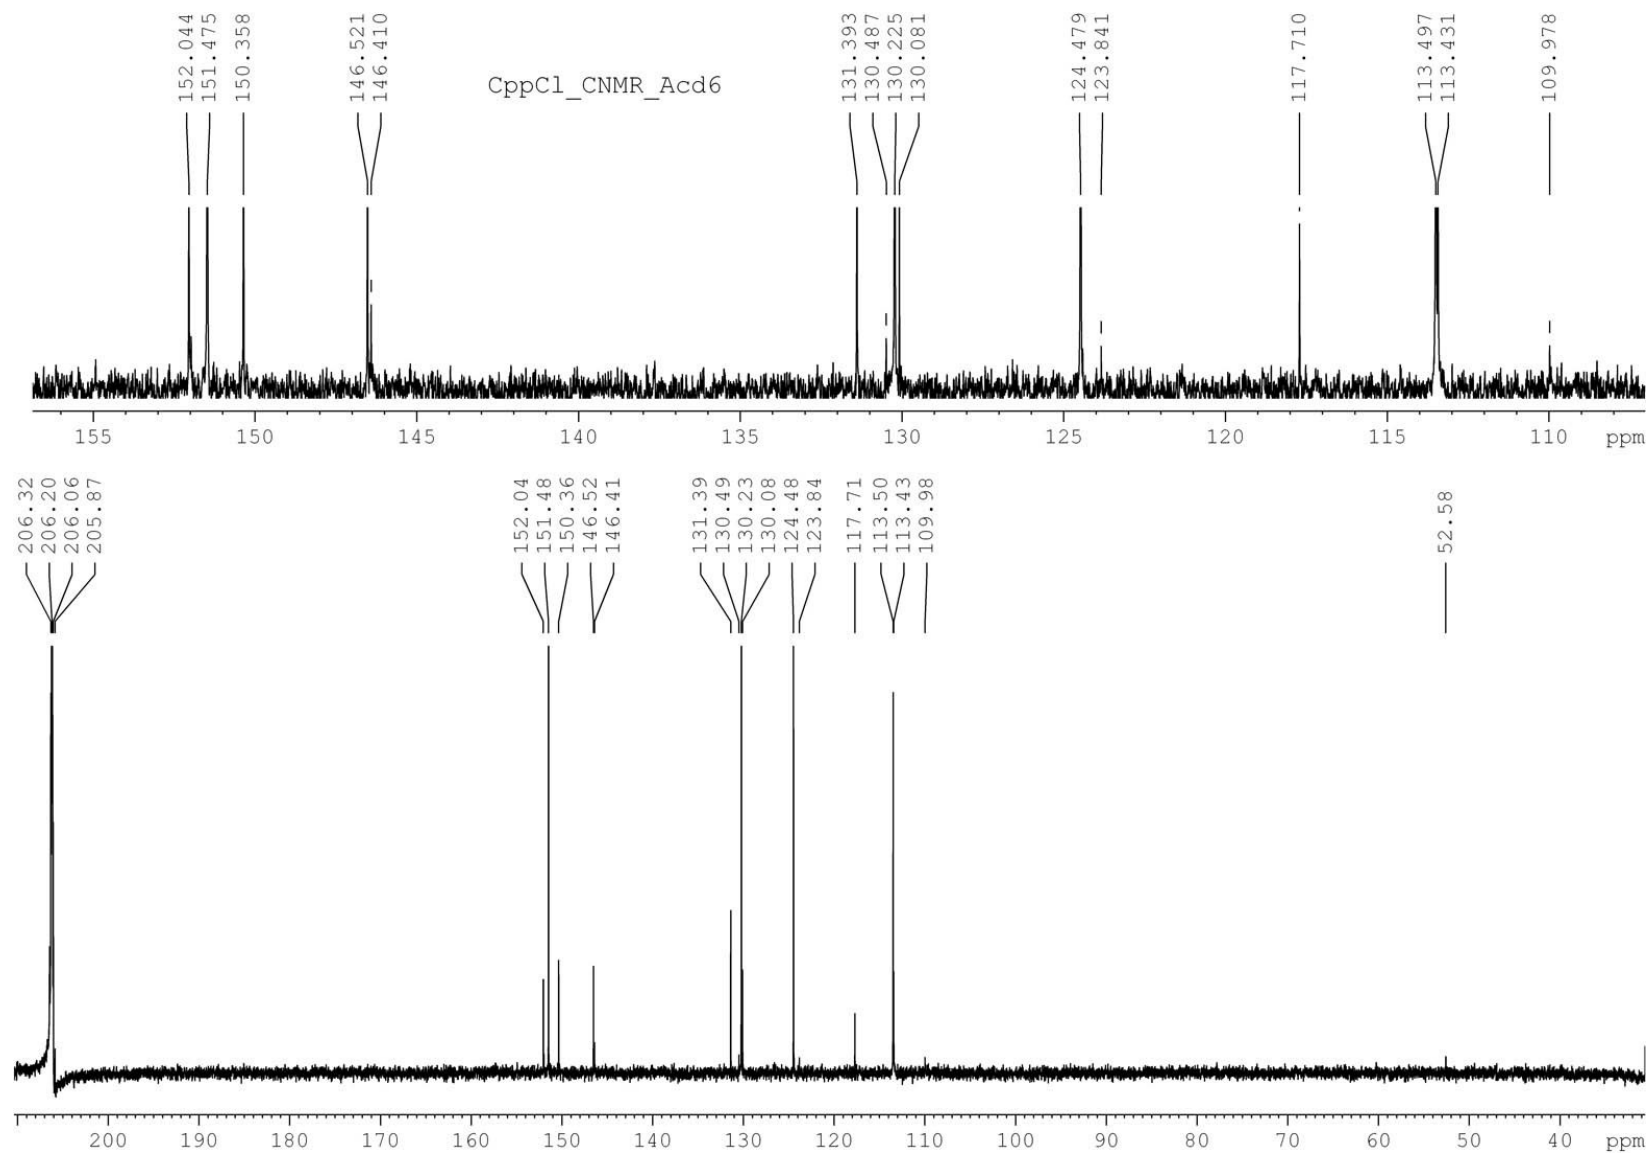

1.2.2.2. **CpmCl**:  $\delta$  113.52, 121.49, 123.24, 126.75, 131.52, 134.82, 146.46, 151.49, 151.89, 152.29;

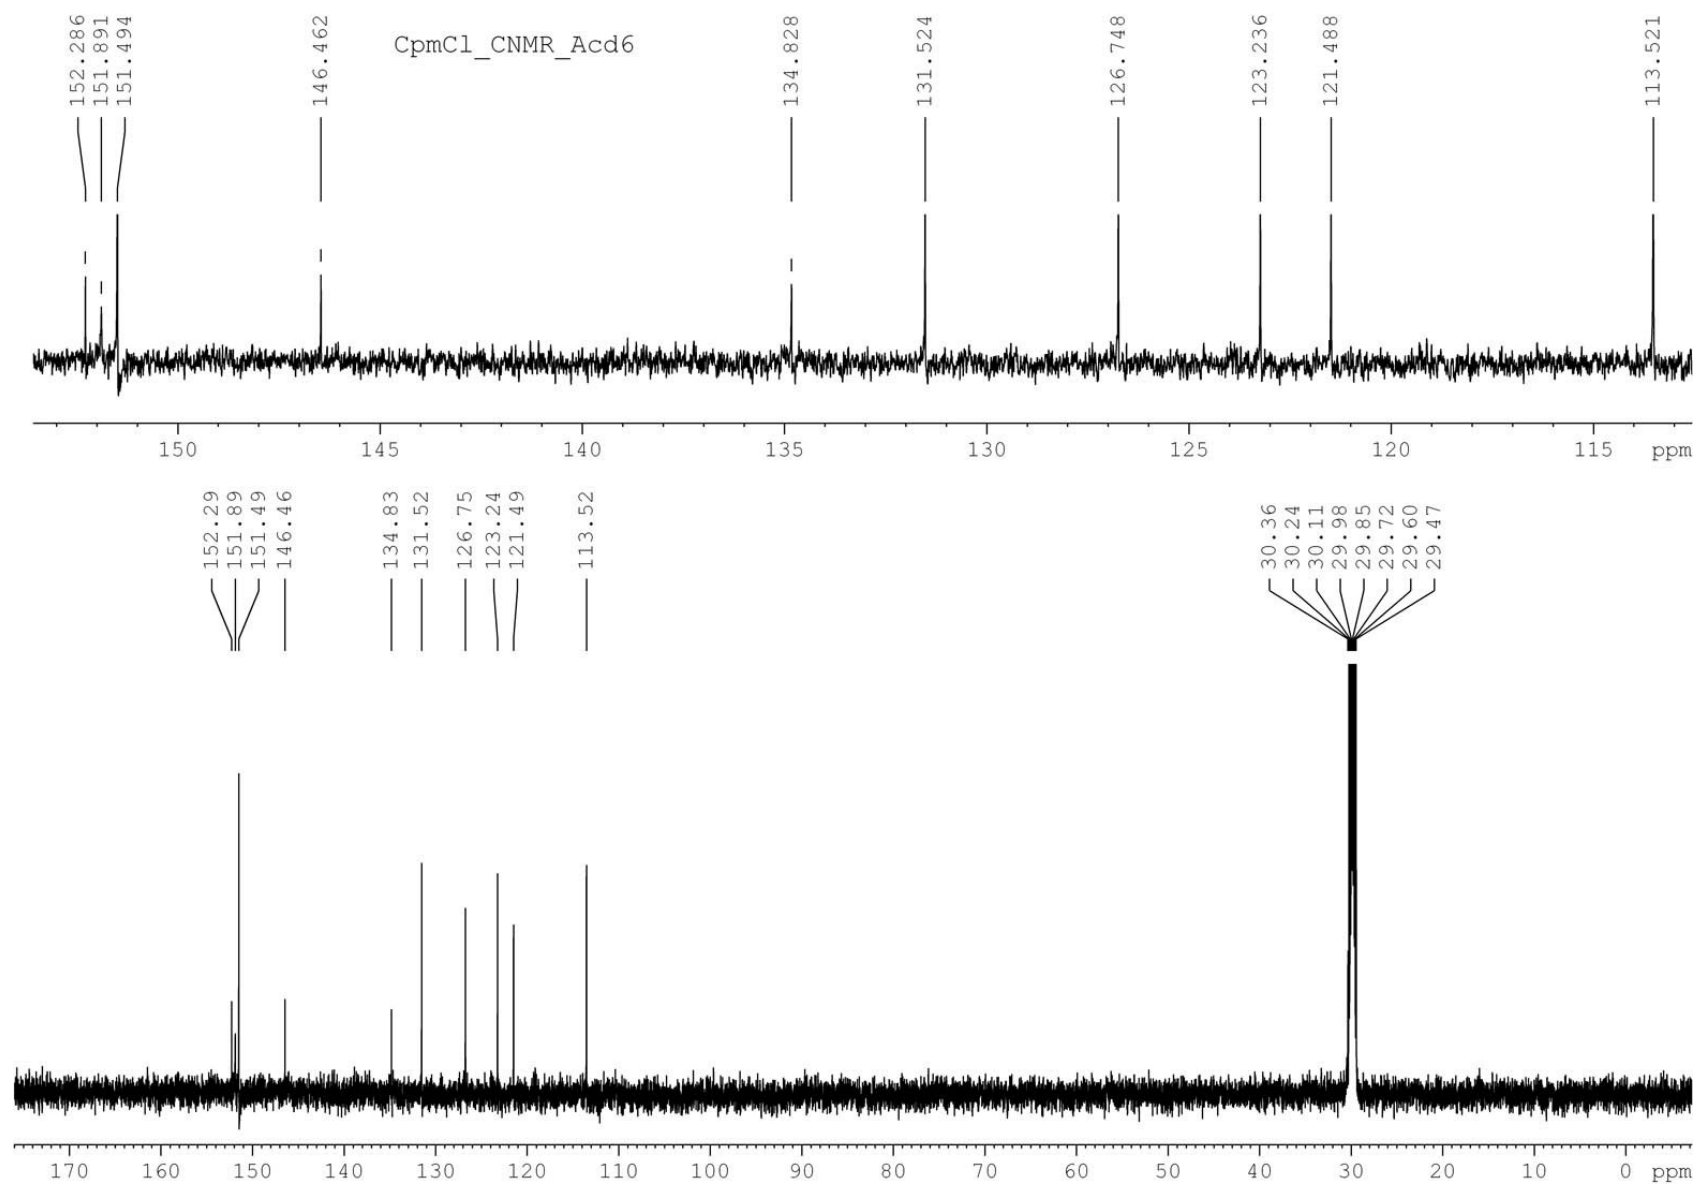

1.2.2.3. **CpoCl**:  $\delta$  113.48, 125.43, 127.87, 128.33, 129.08, 131.04, 146.47, 147.58, 151.34, 151.53;

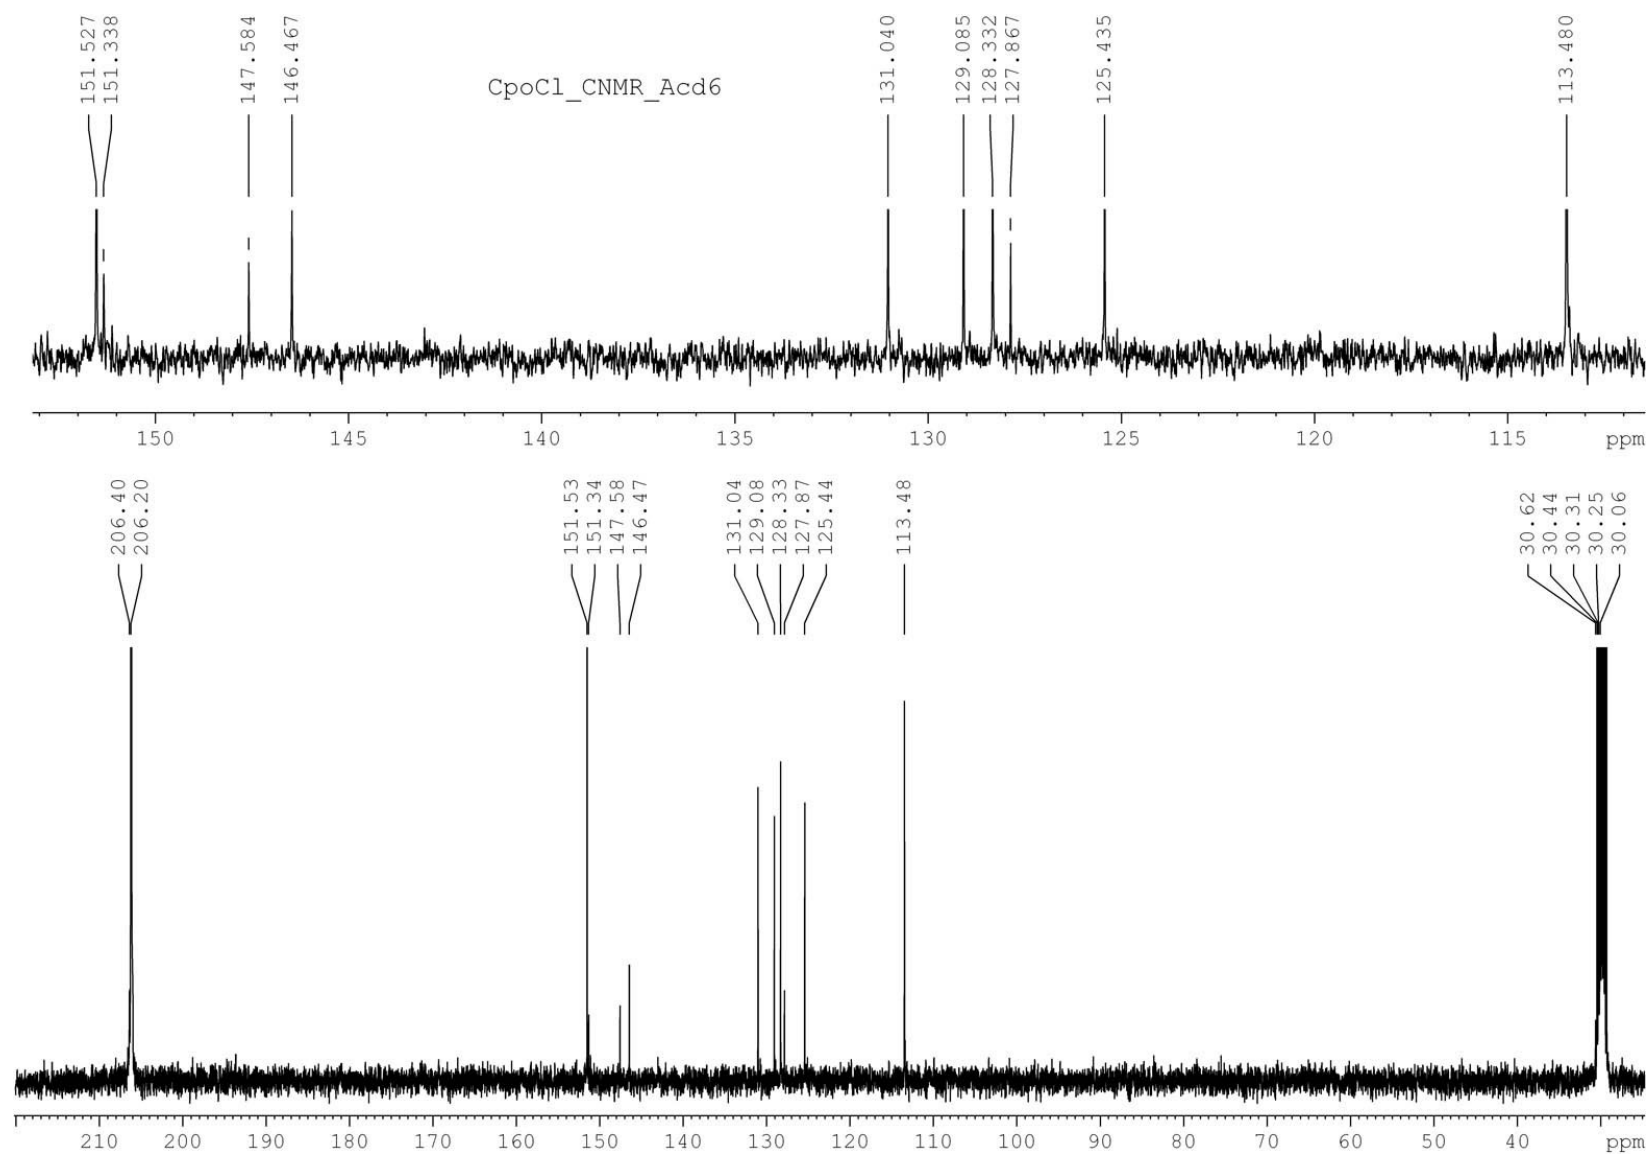

1.2.2.4. **CmpCl**  $\delta$  124.40, 124.46, 126.17, 130.16, 131.20, 136.29, 141.52, 145.38, 150.56, 152.47;

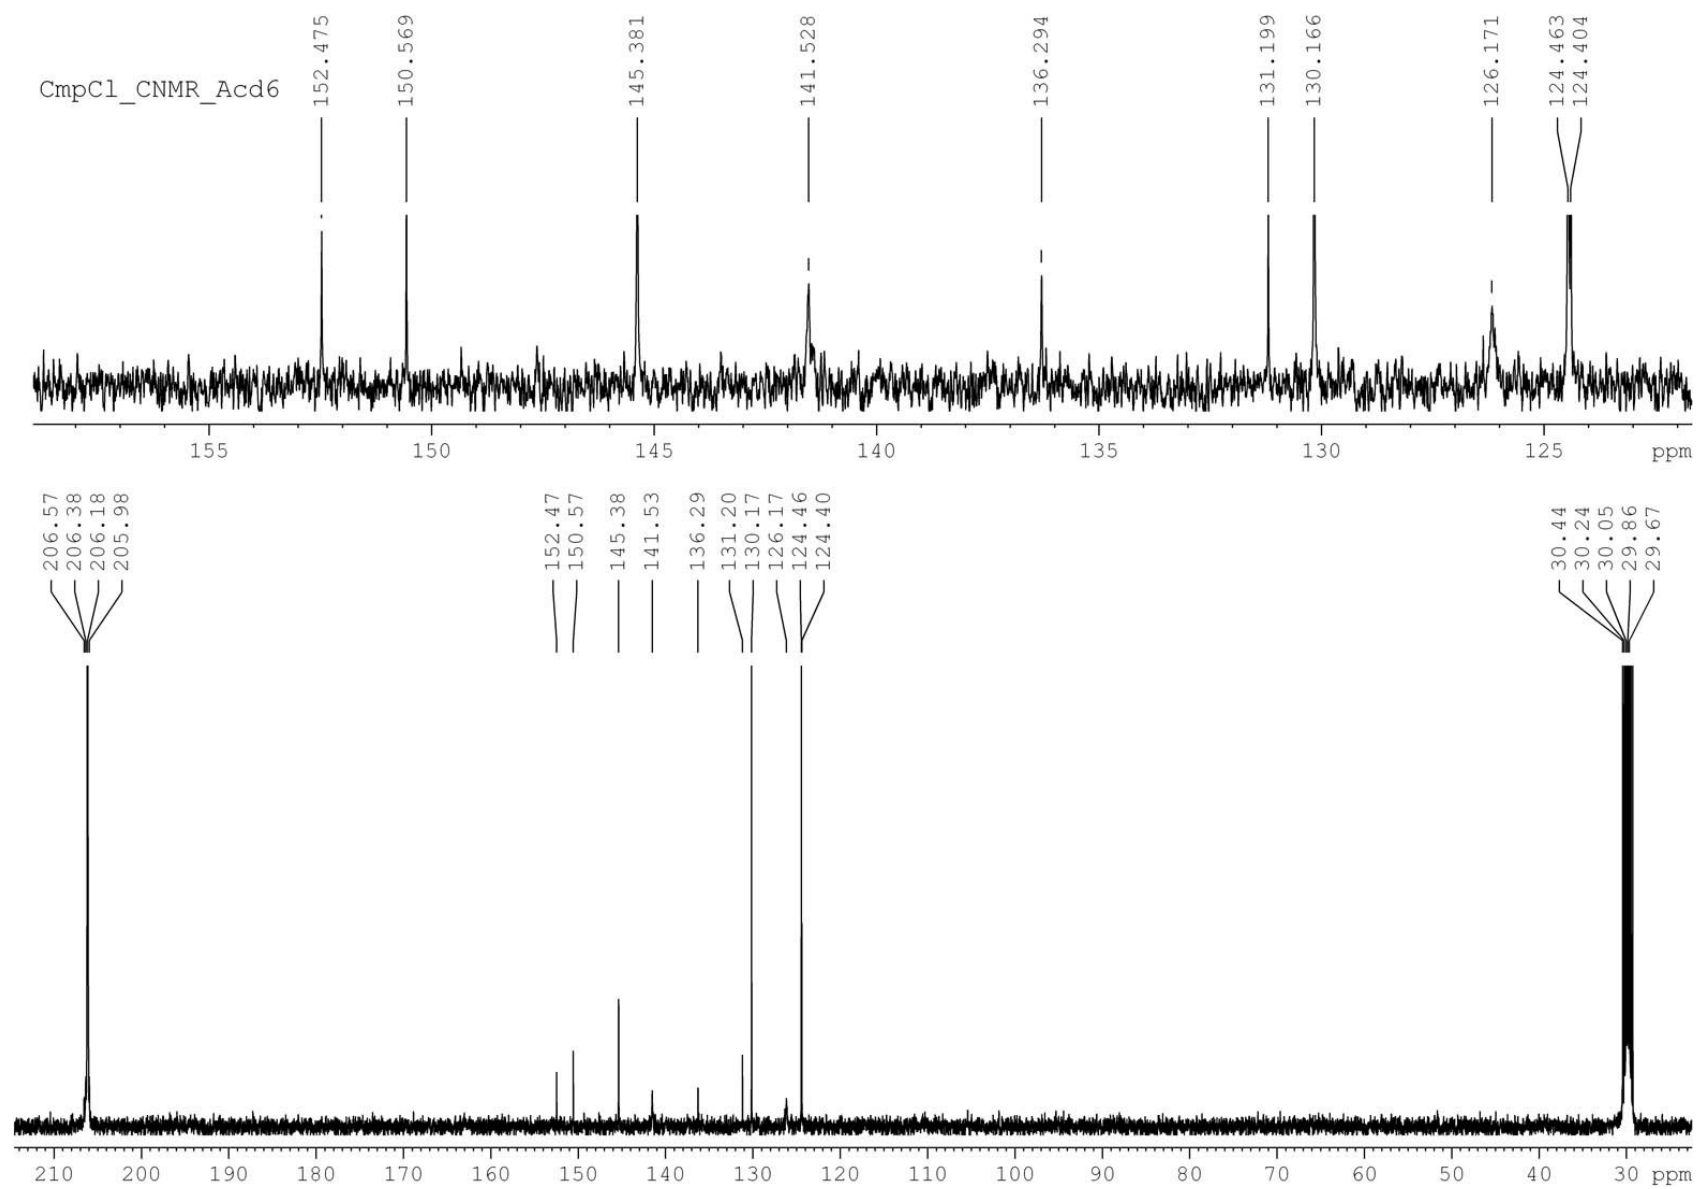



1.2.2.5. **CmmCl**:  $\delta$  121.46, 123.21, 124.41, 126.23, 126.56, 131.47/131.56, 134.79, 136.25, 141.57, 145.44, 152.33, 152.52;

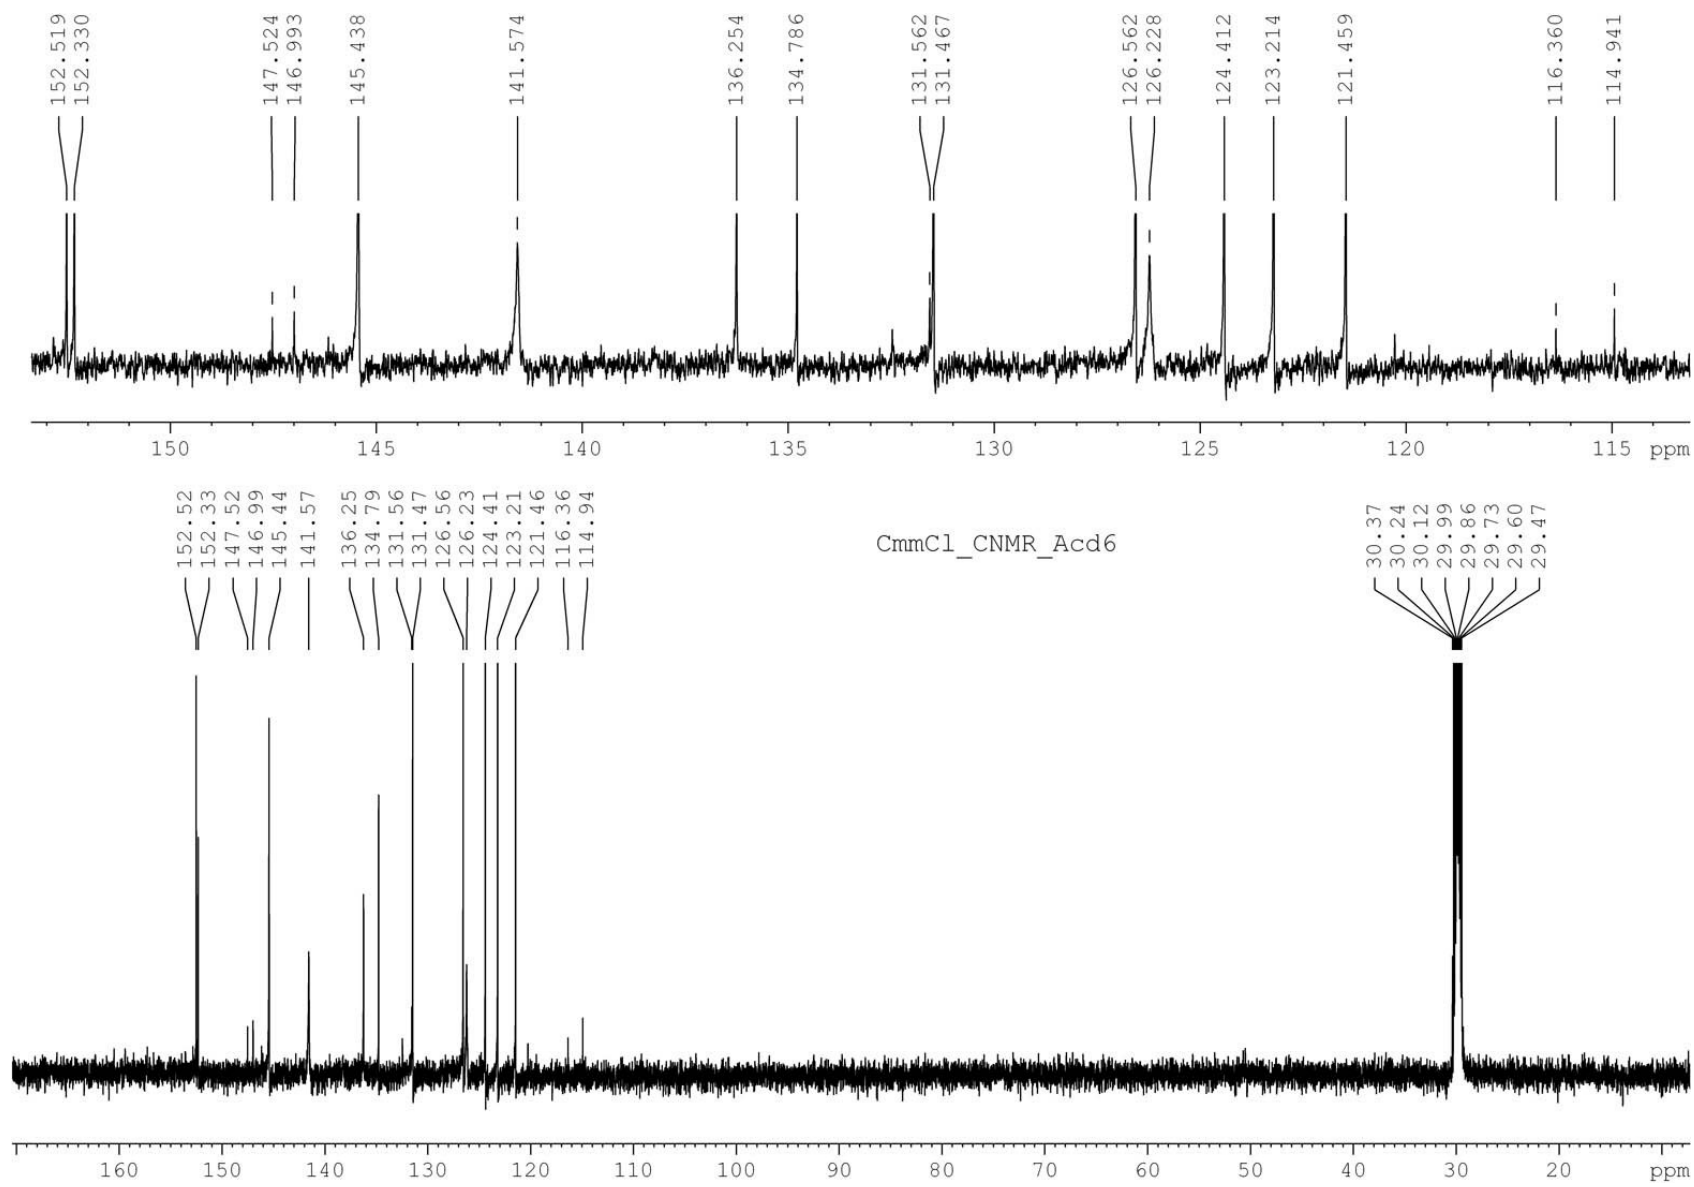

1.2.2.6. **CmoCl**:  $\delta$  124.45, 125.47, 126.11, 127.92, 128.16, 129.02, 131.00, 136.27, 141.47, 145.47, 147.80, 151.79;

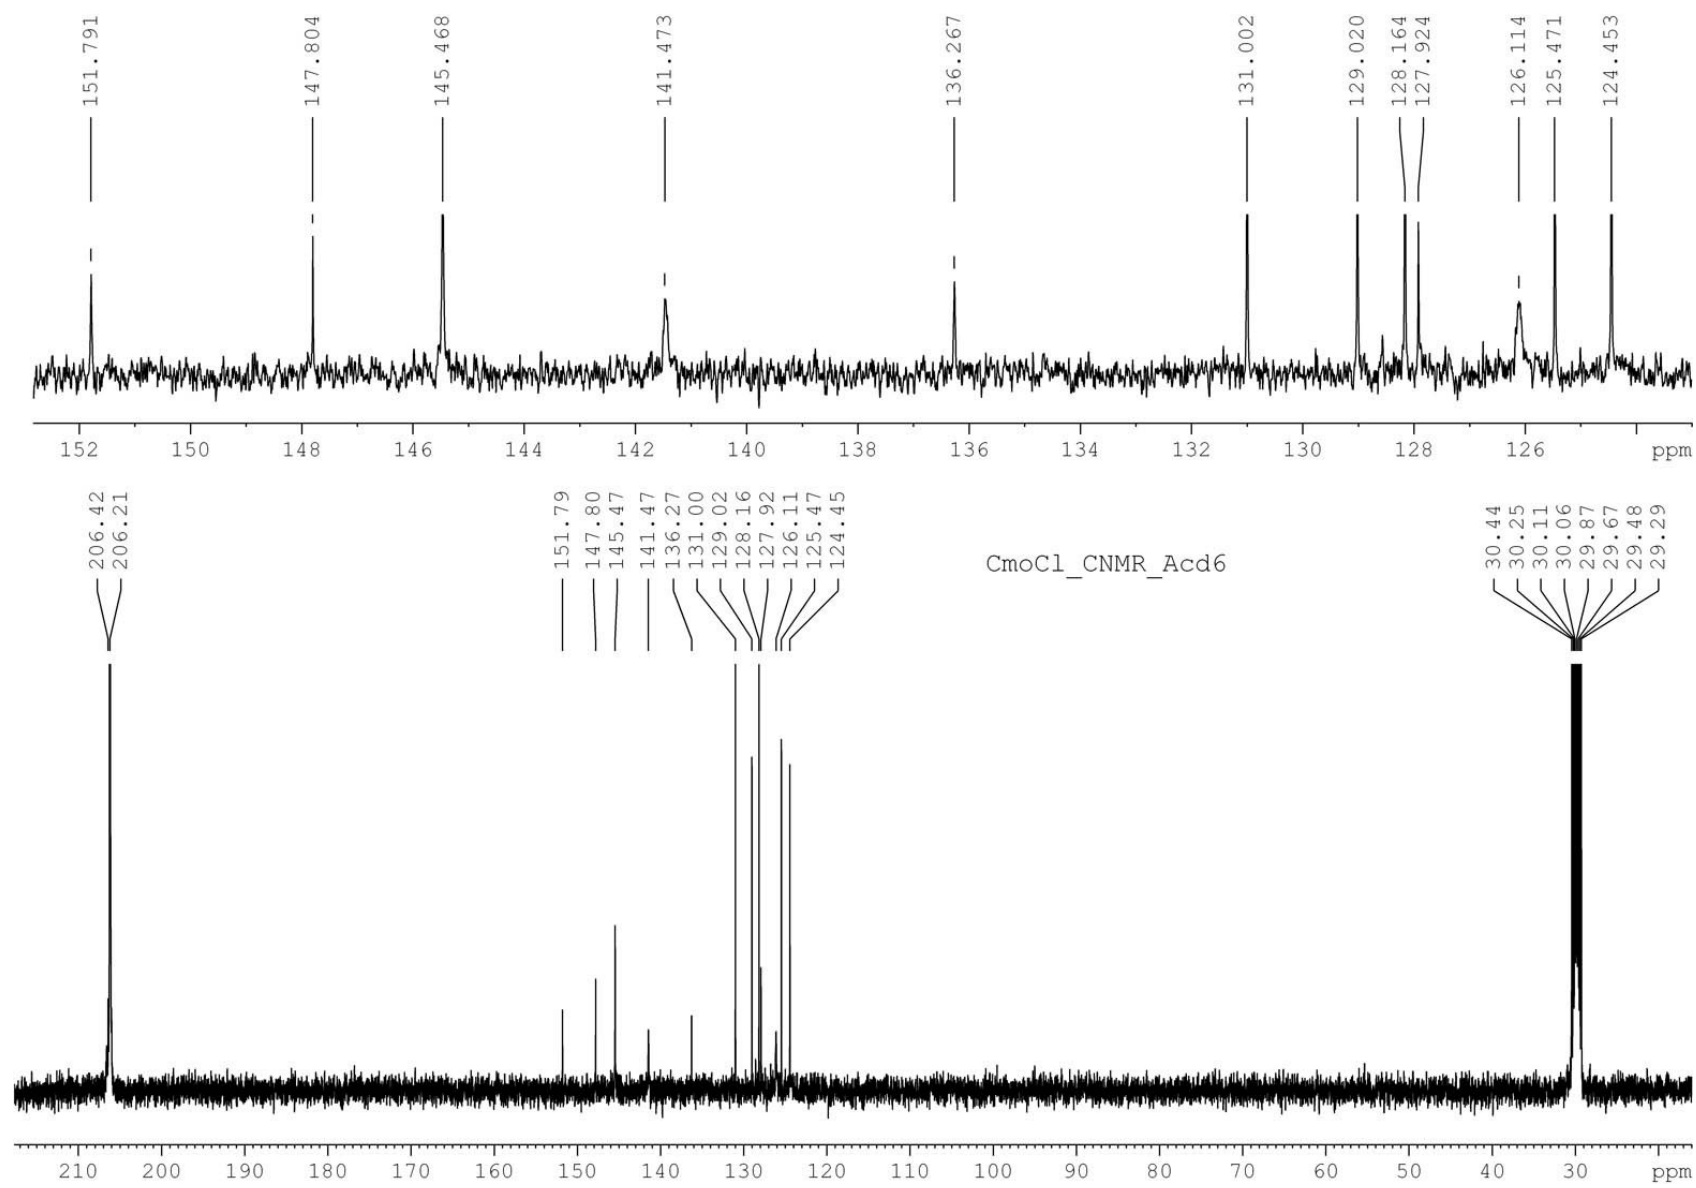

1.2.2.7. **CopCl**:  $\delta$  113.22, 117.73, 120.13, 124.54, 130.17, 139.02, 149.08, 150.59, 152.36, 152.78.

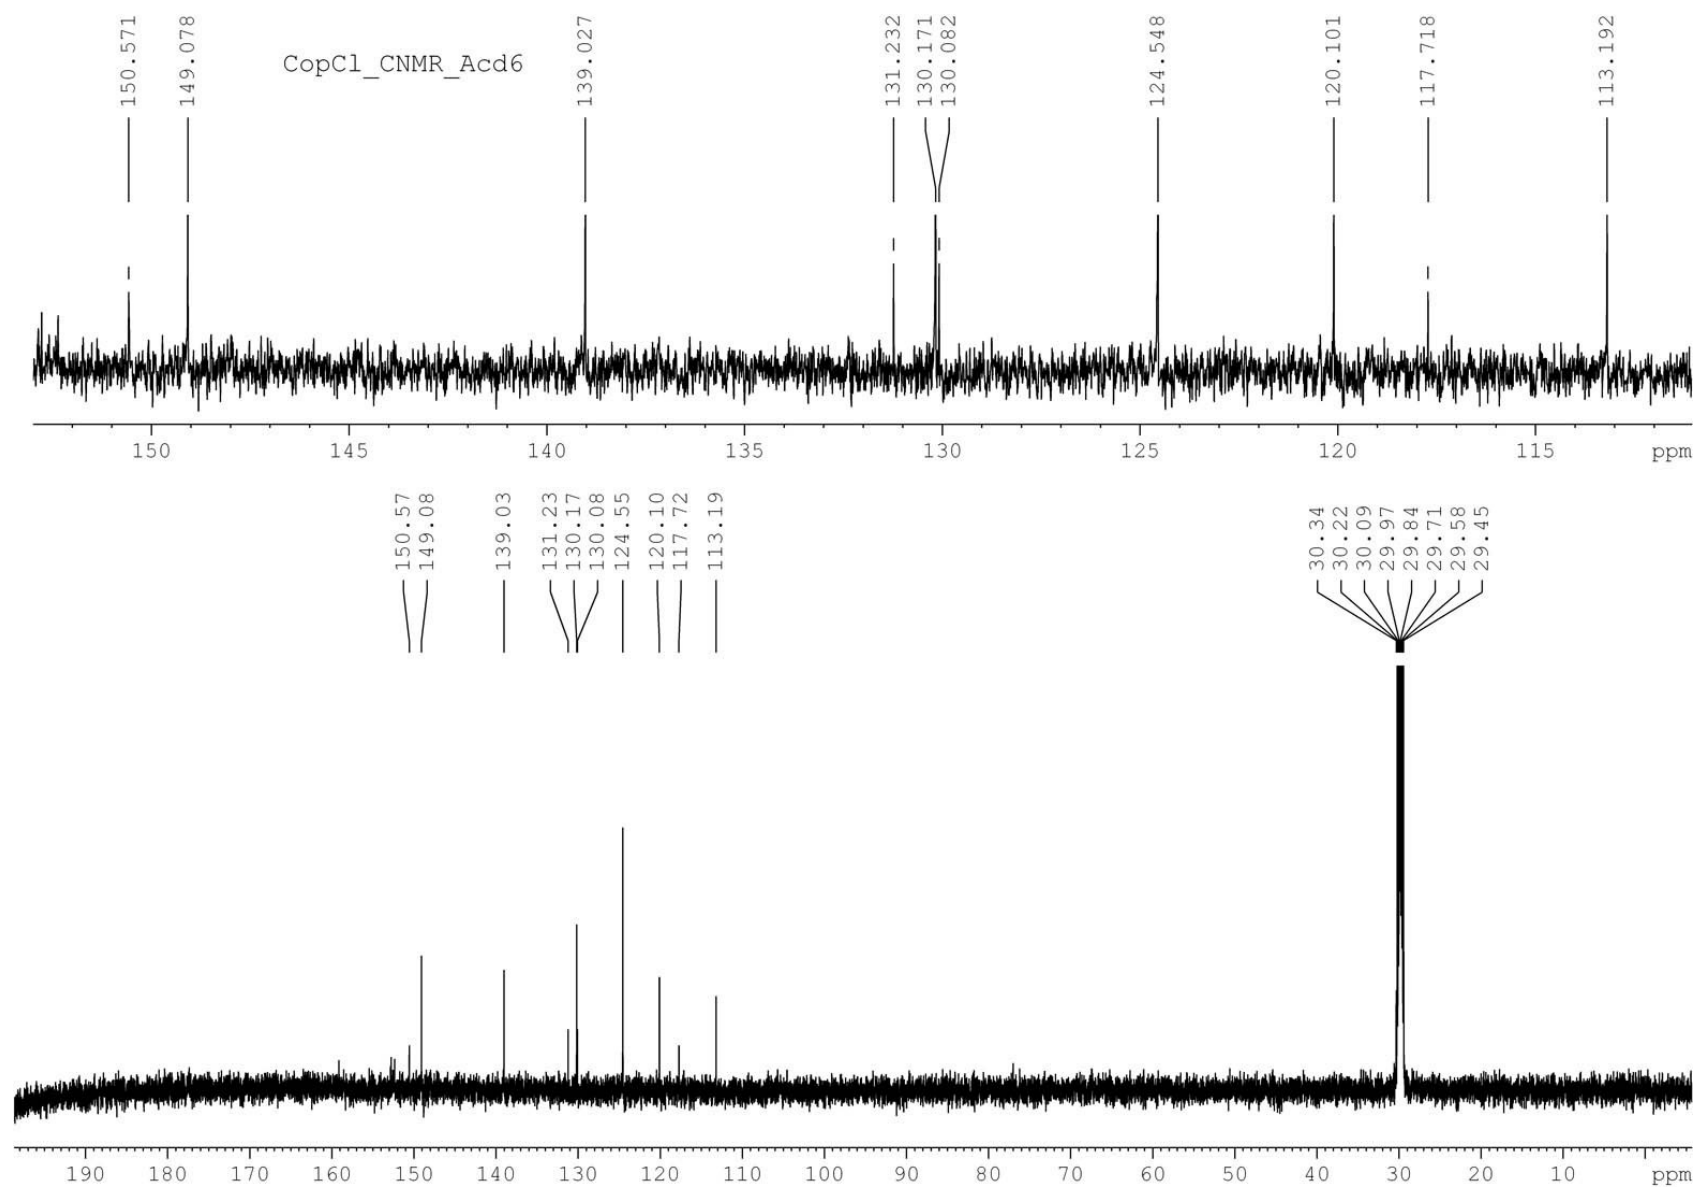

1.2.2.8. ComCl:  $\delta$  113.23, 120.15, 121.56, 123.32, 126.59, 131.48/131.56, 134.79, 139.06, 149.09, 152.22, 152.50, 152.74;

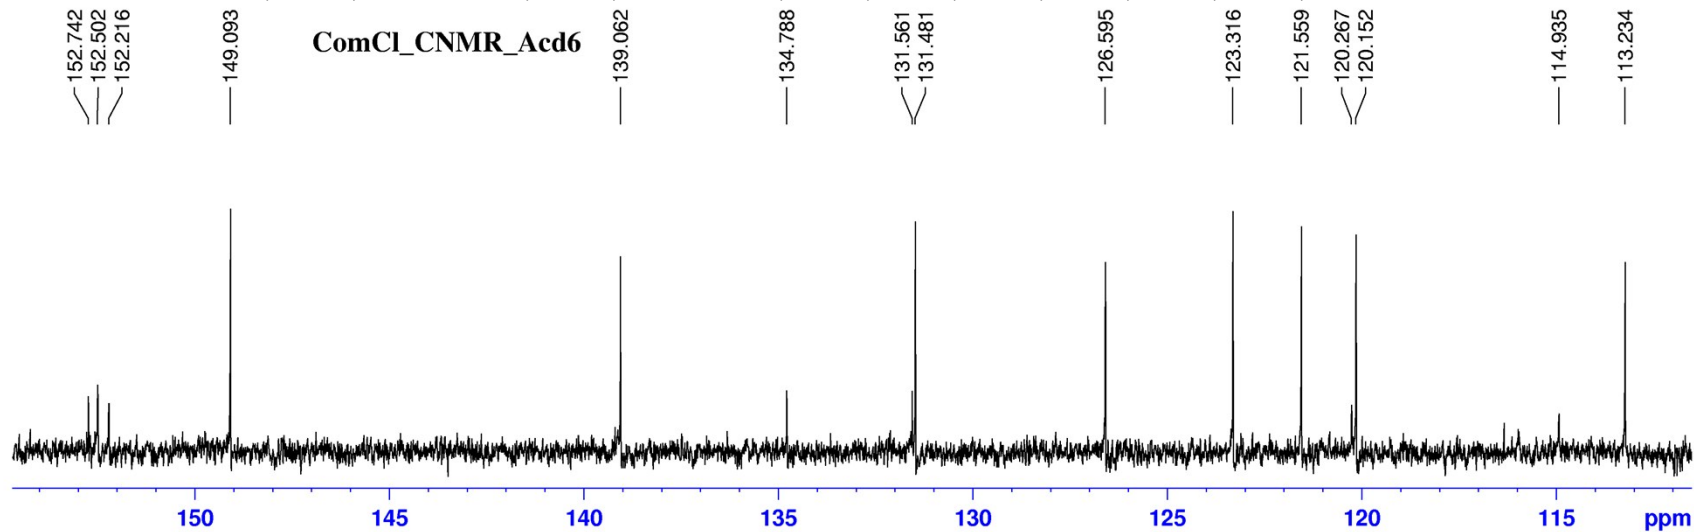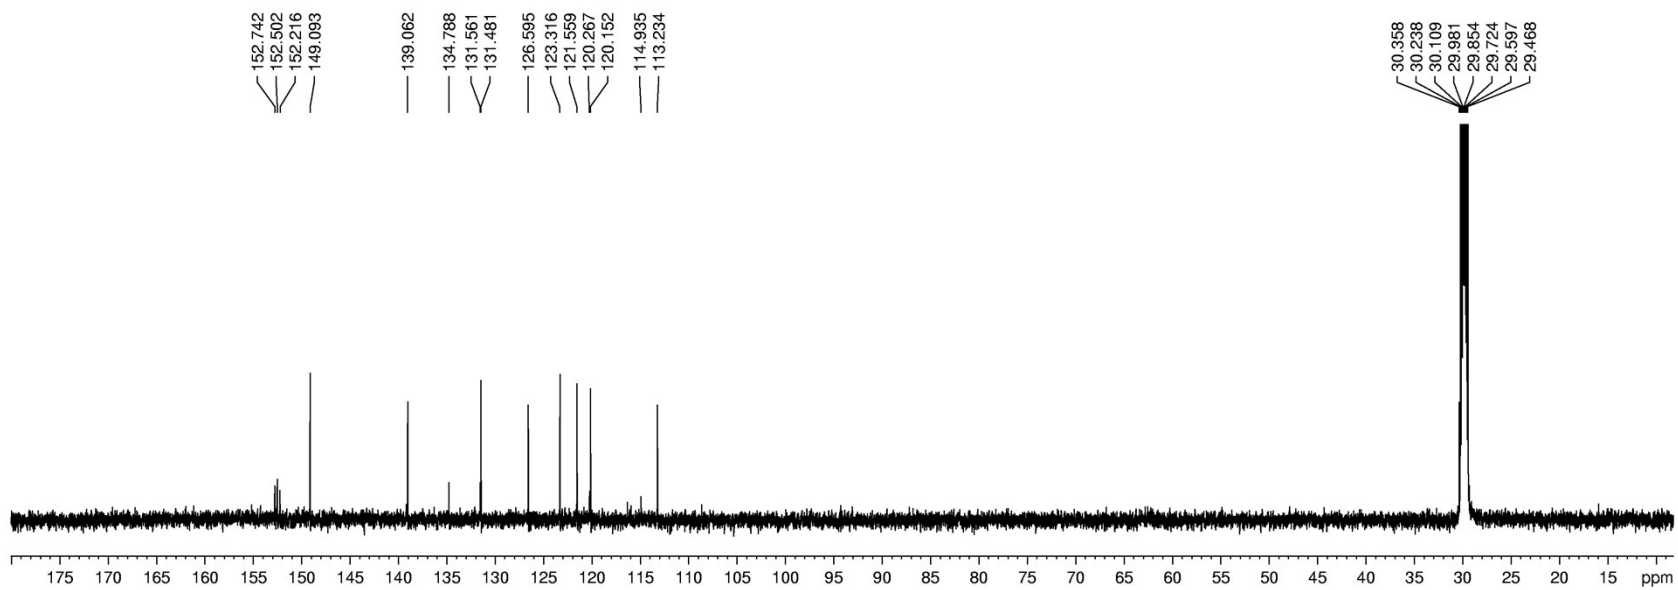

1.2.2.9. **CooCl**:  $\delta$  113.24, 120.20, 125.54, 128.05, 128.20, 129.04, 131.02, 139.29, 147.81, 149.05, 151.70, 152.88;

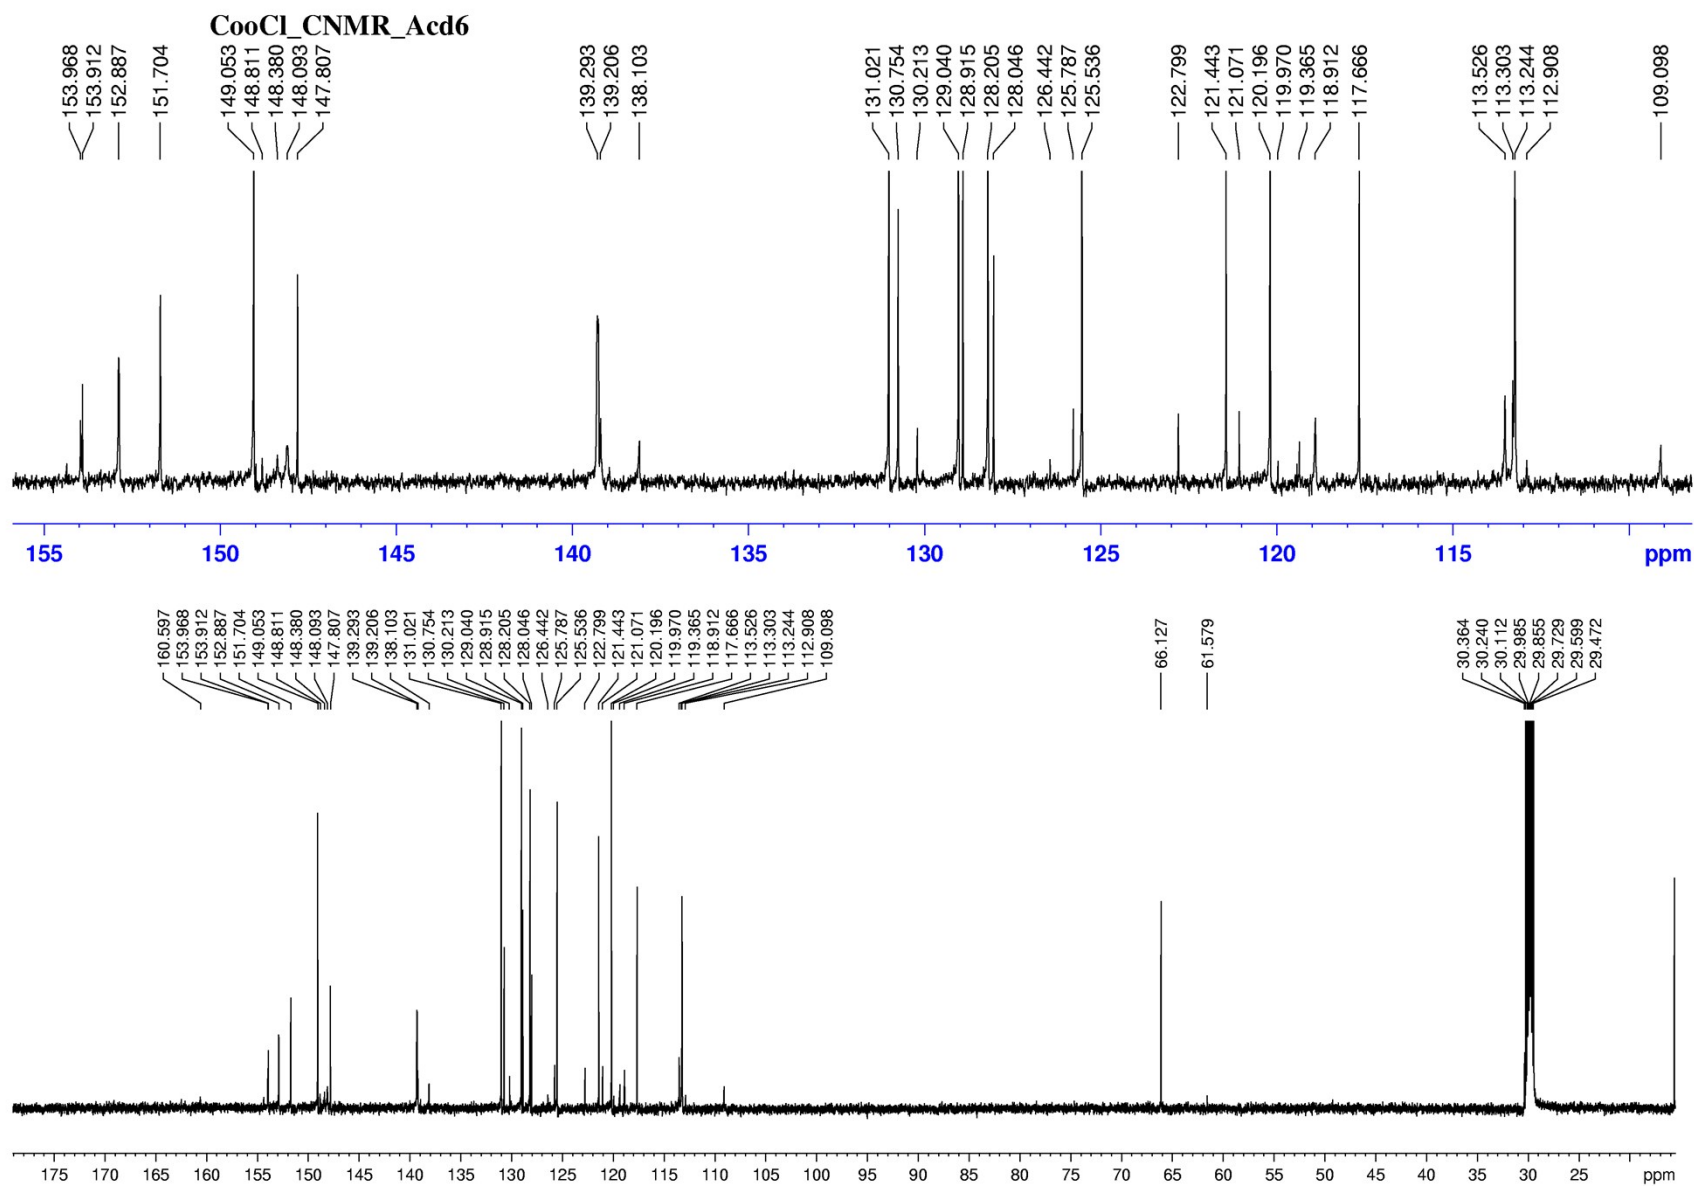

### 1.2.3. IR (ATR) data and spectra

1.2.3.1. **CppCl**: 3163 (w), 3103 (w), 3070 (w), 3029 (w), 2879 (w), 2787 (w), 1748 (s), 1627 (m), 1589 (s), 1543 (m), 1530 (m), 1505 (w), 1486 (s), 1422 (m).

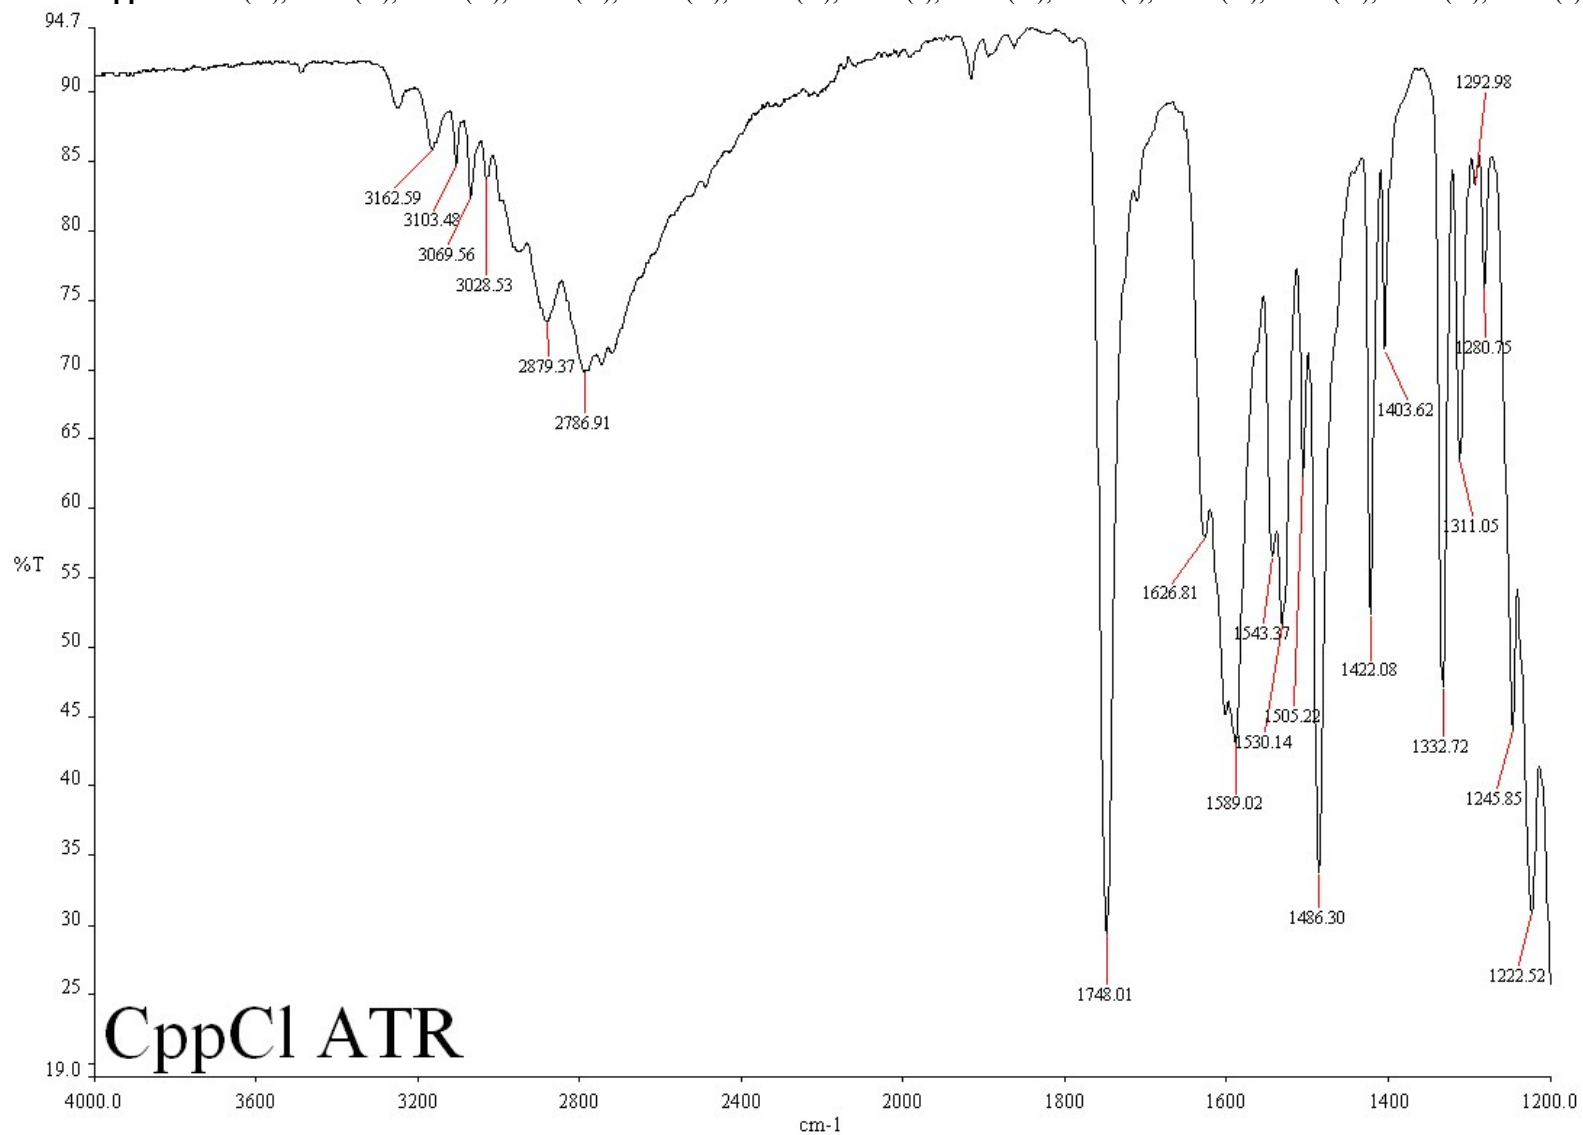

1.2.3.2. **CpmCl**: 3163 (w), 2882 (m), 2796 (m), 1749 (s), 1626 (m), 1591 (s), 1542 (s), 1530 (s), 1474 (s), 1420 (s).

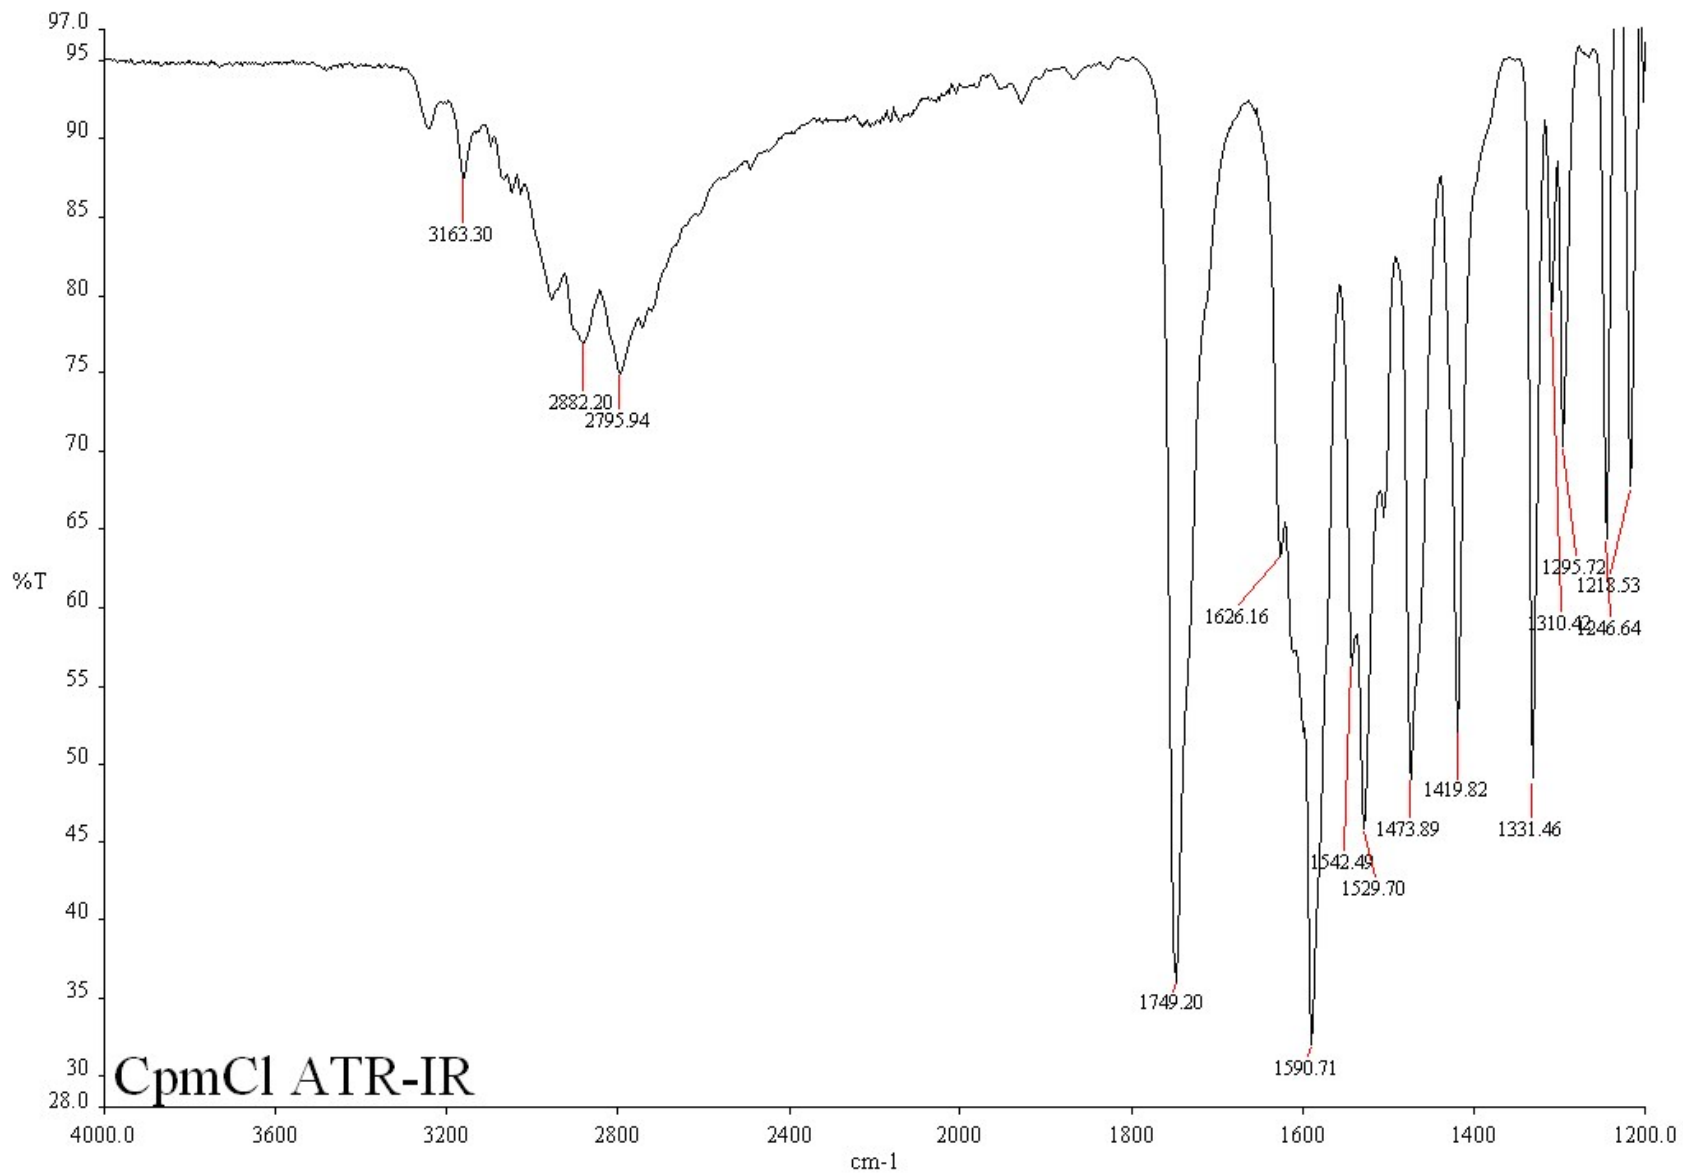

1.2.3.3. **CpoCl**: 3165 (w), 2890 (m), 2799 (m), 1747 (s), 1598 (s), 1532 (s), 1509 (m), 1478 (s), 1448 (m), 1423 (s).

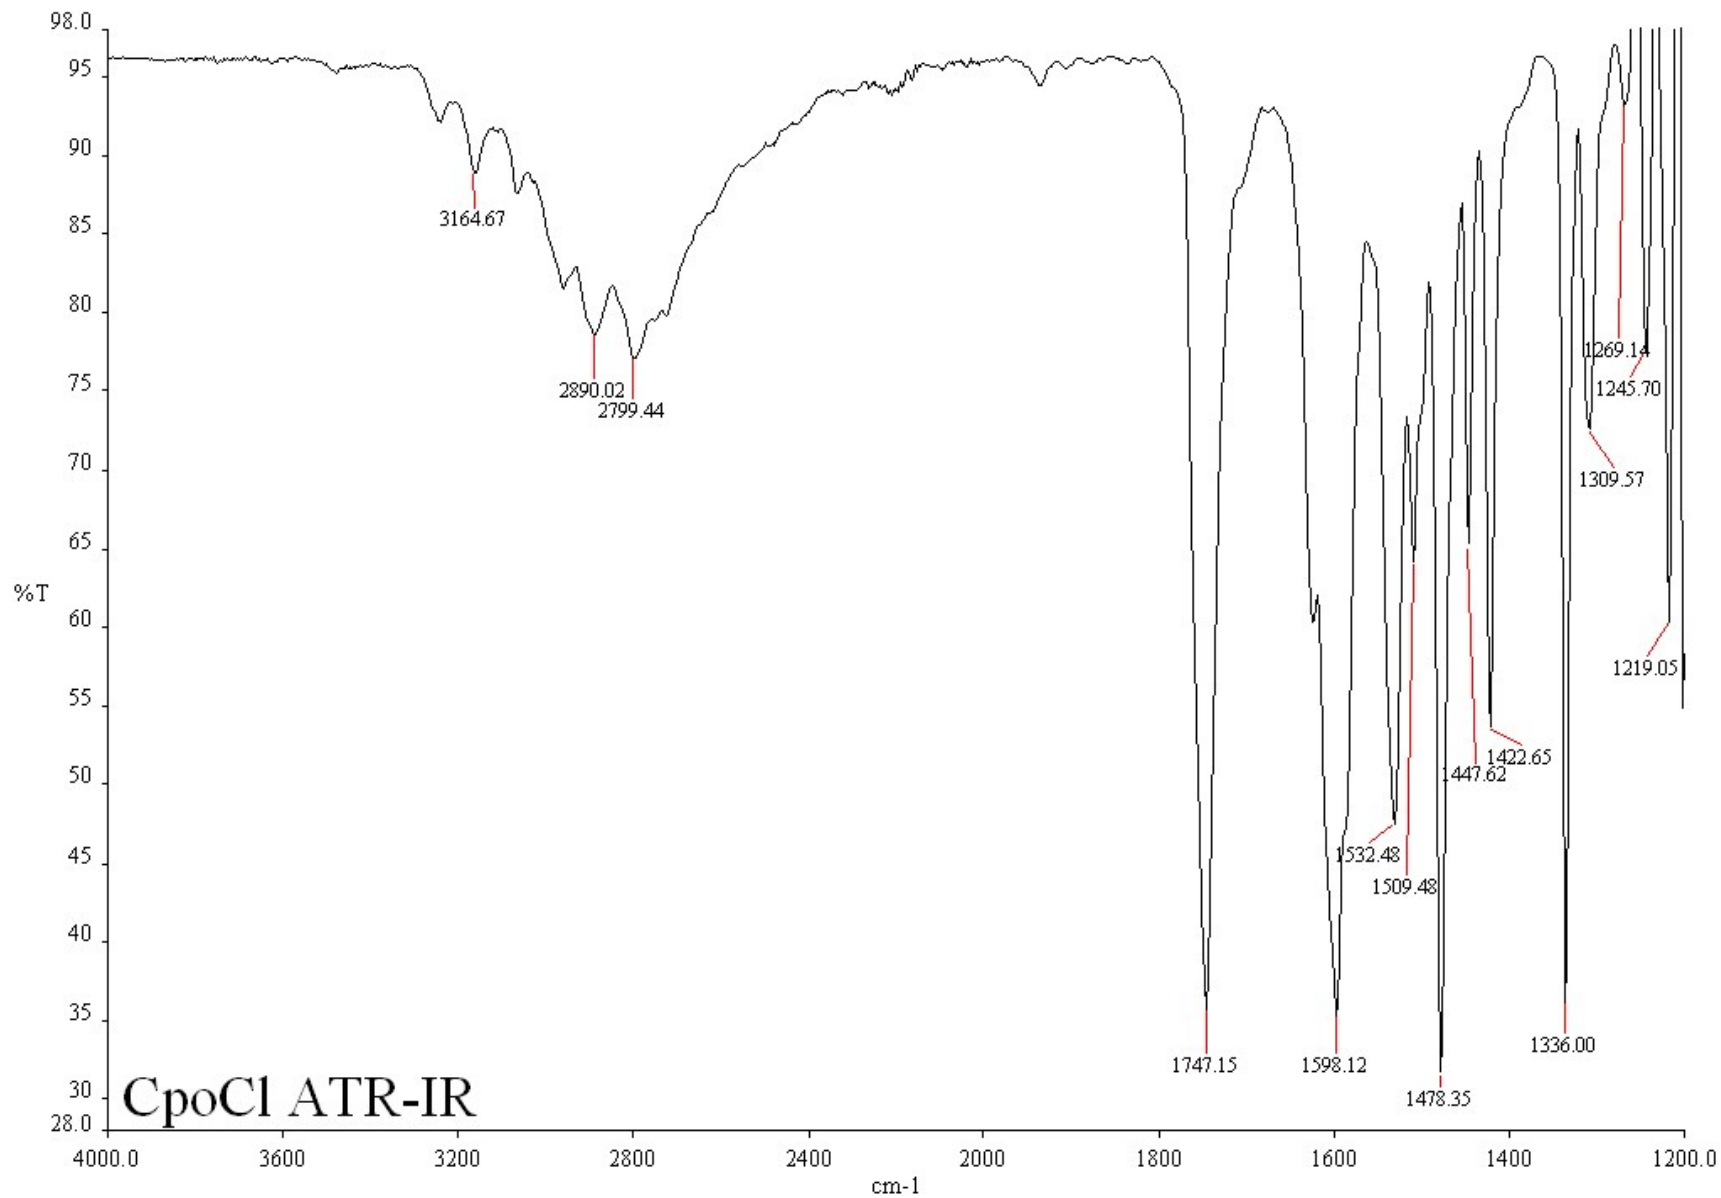



1.2.3.4. **CmpCl**: 3180 (w), 3099 (w), 3074 (w), 3052 (w), 2928 (w), 2872 (w), 2818 (w), 1740 (s), 1610 (m), 1587 (s), 1560 (m), 1486 (s), 1424 (s), 1406 (m).

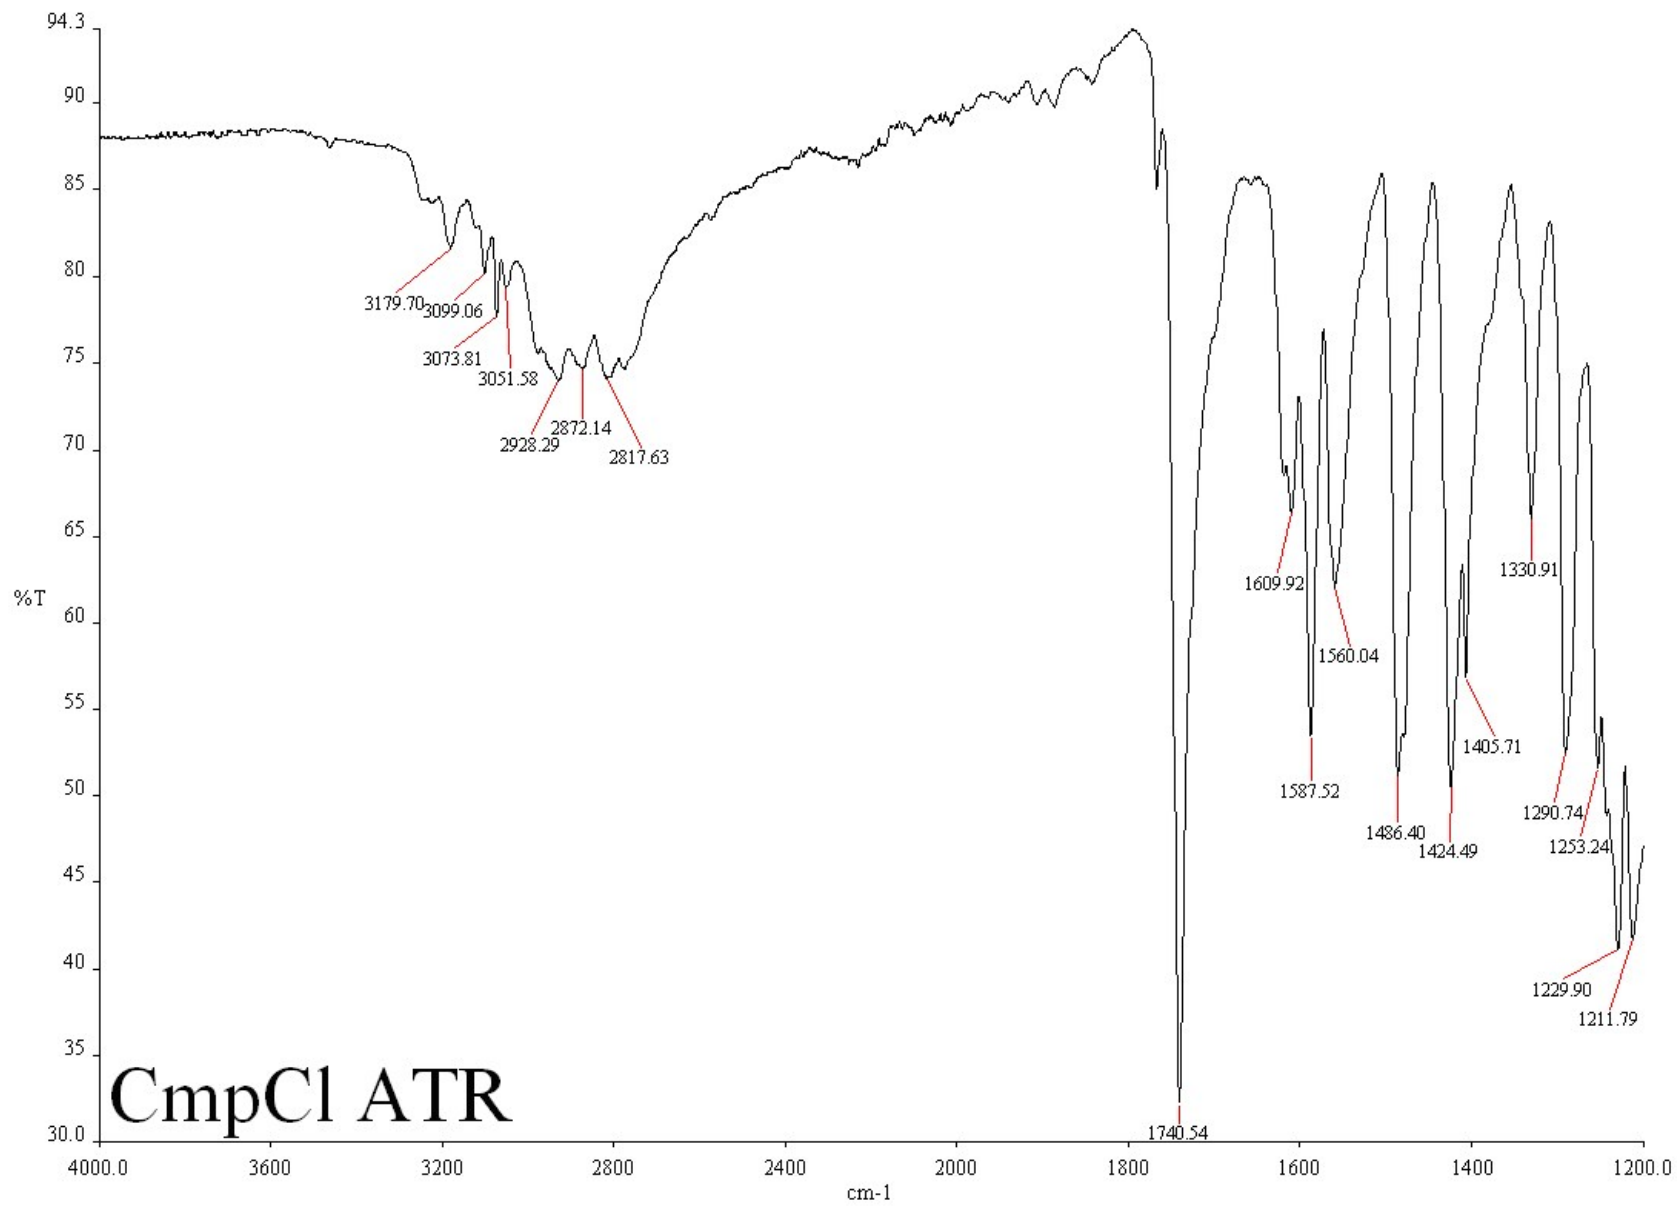

1.2.3.5. **CmmCl**: 3182 (w), 3092 (w), 2884 (m), 2813 (m), 1741 (s), 1613 (m), 1589 (s), 1559 (s), 1477 (s), 1426 (s).

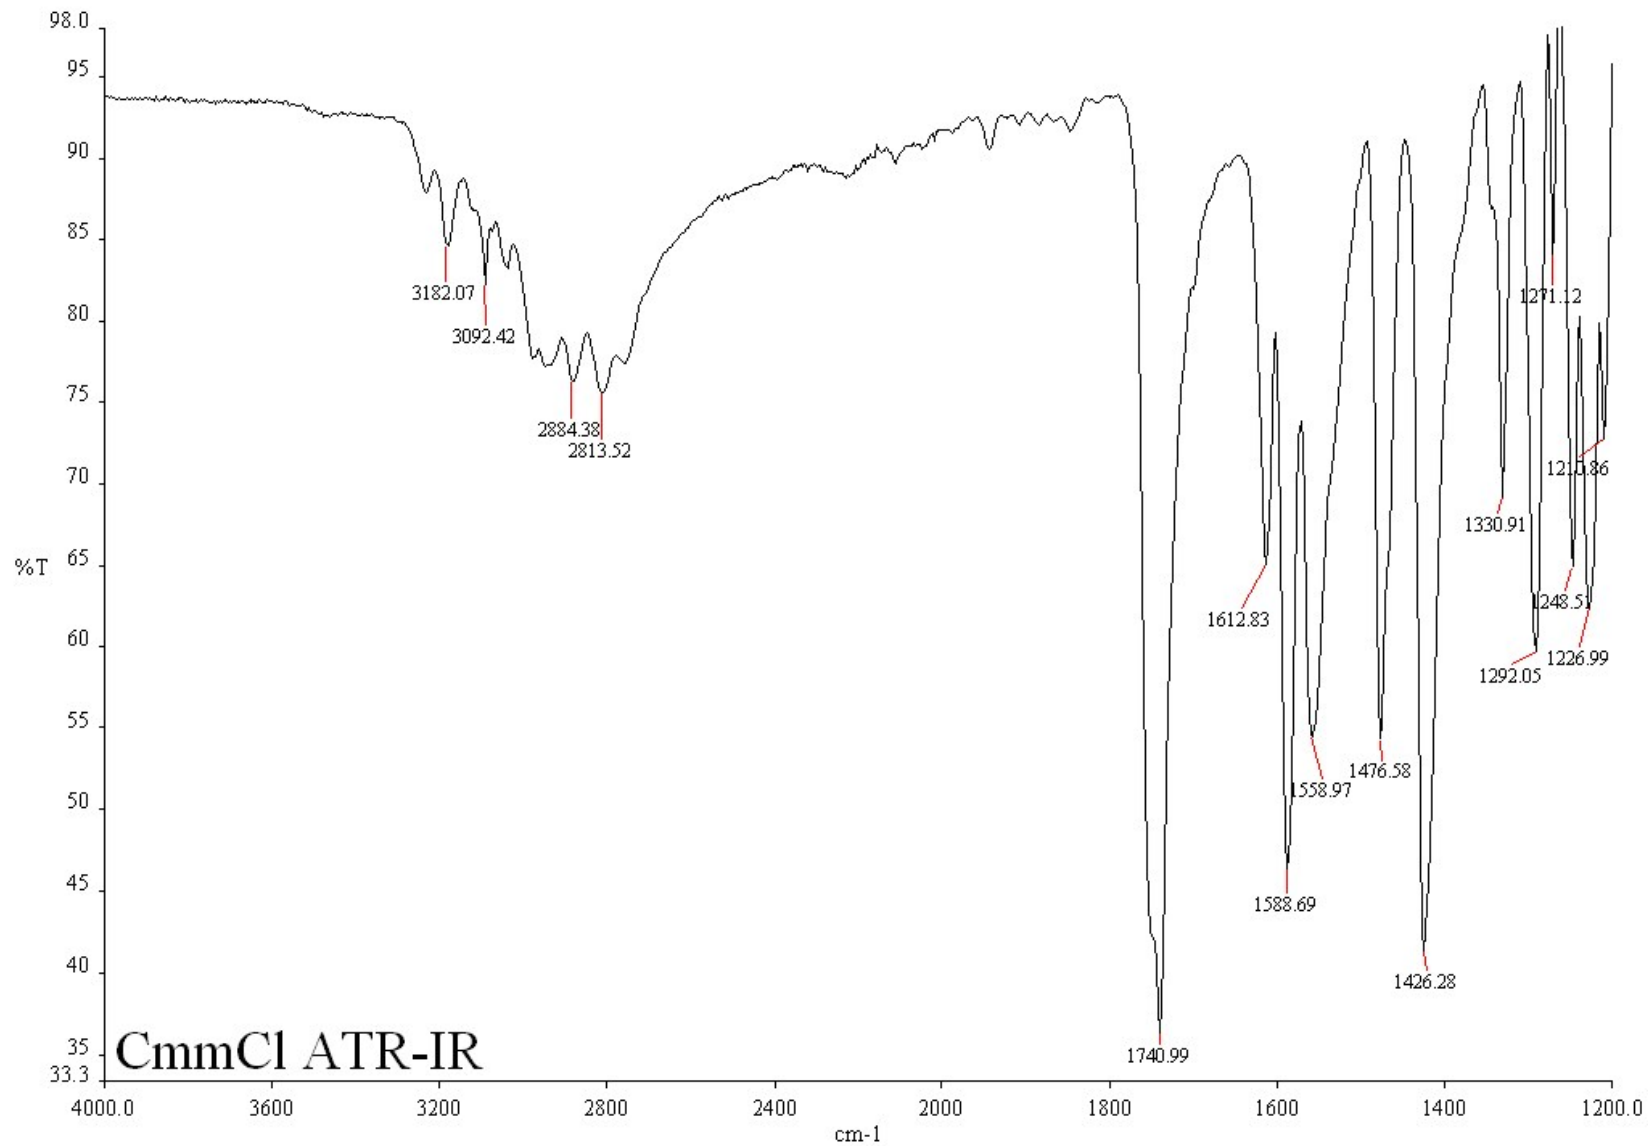

1.2.3.6. **CmoCl**: 3242 (w), 3189 (w), 3049 (w), 2988 (m), 1744 (s), 1618 (m), 1590 (w), 1557 (s), 1478 (s), 1446 (m), 1417 (m).

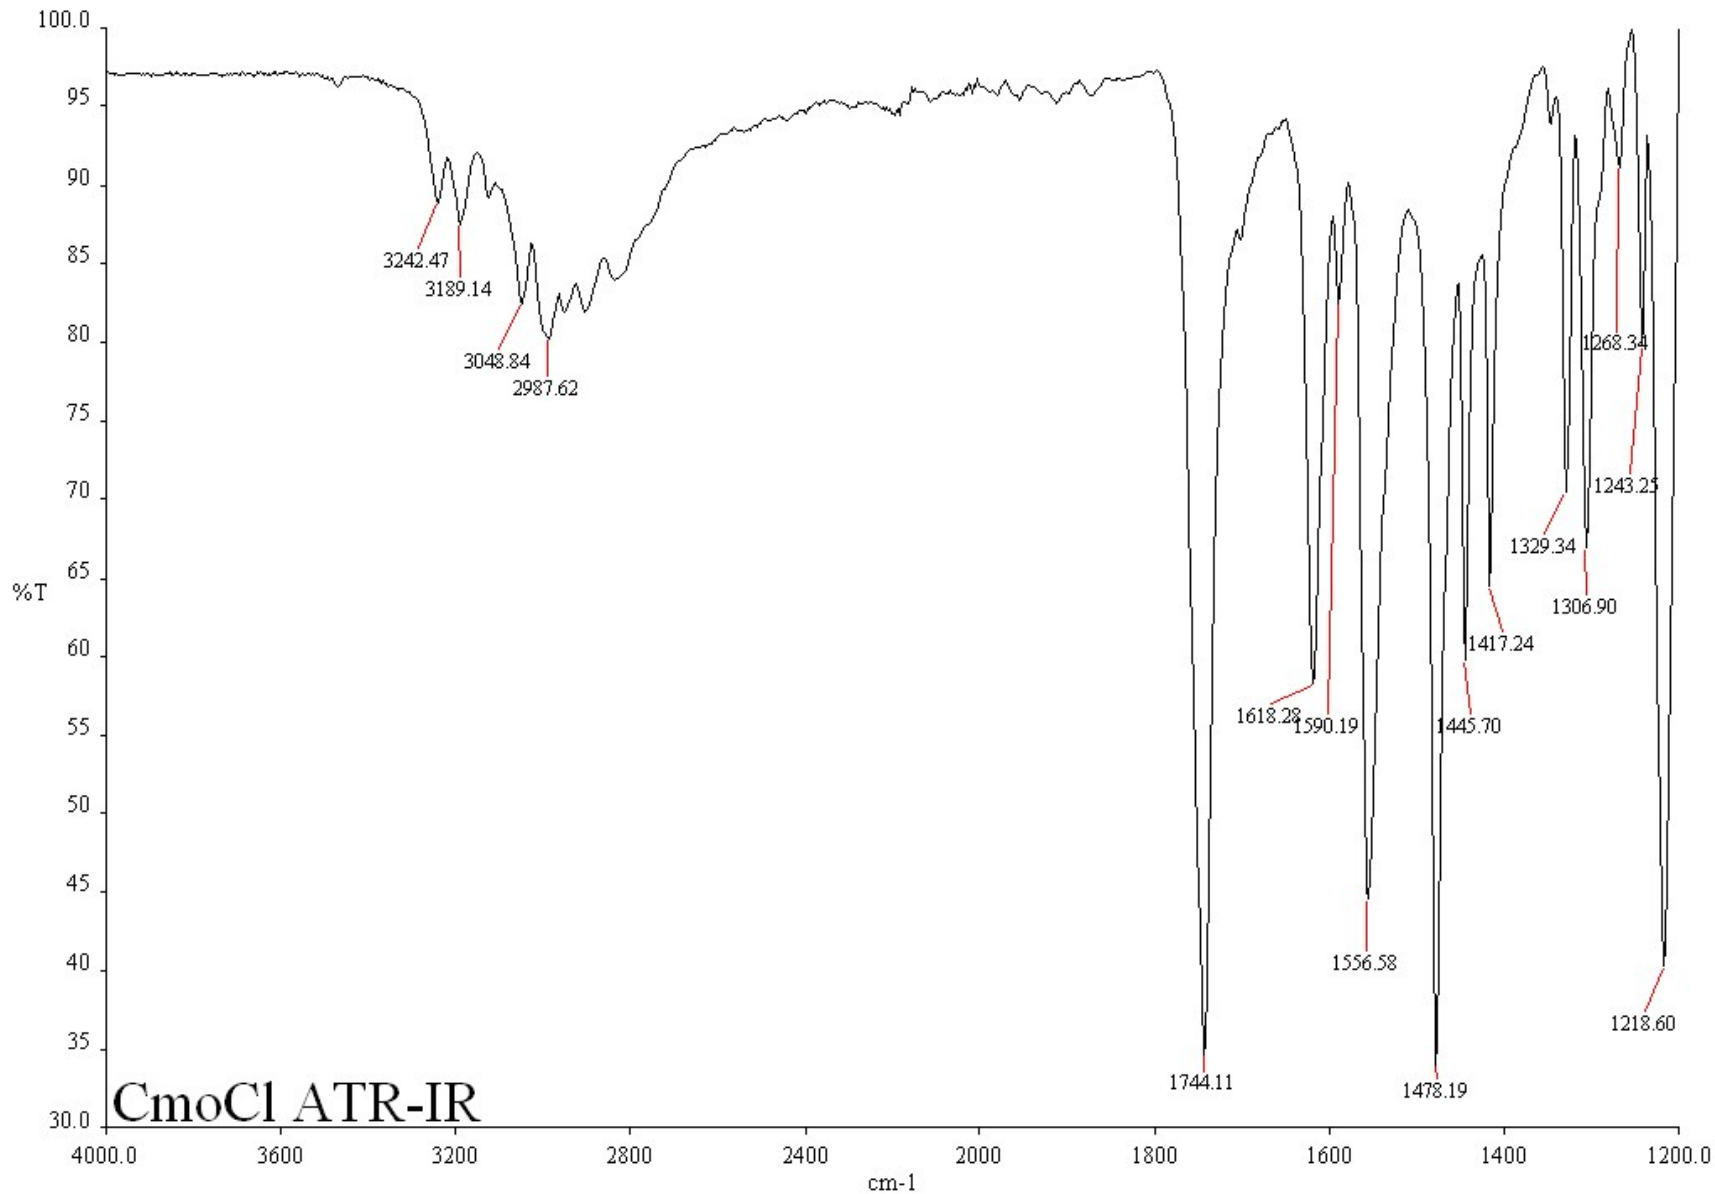

1.2.3.7. **CopCl**: 3179 (w), 3119 (w), 3084 (w), 3062 (w), 2955 (m), 2827 (w), 1741 (s), 1704 (w), 1598 (s), 1584 (s), 1542 (s), 1487 (s), 1440 (s), 1404 (m).

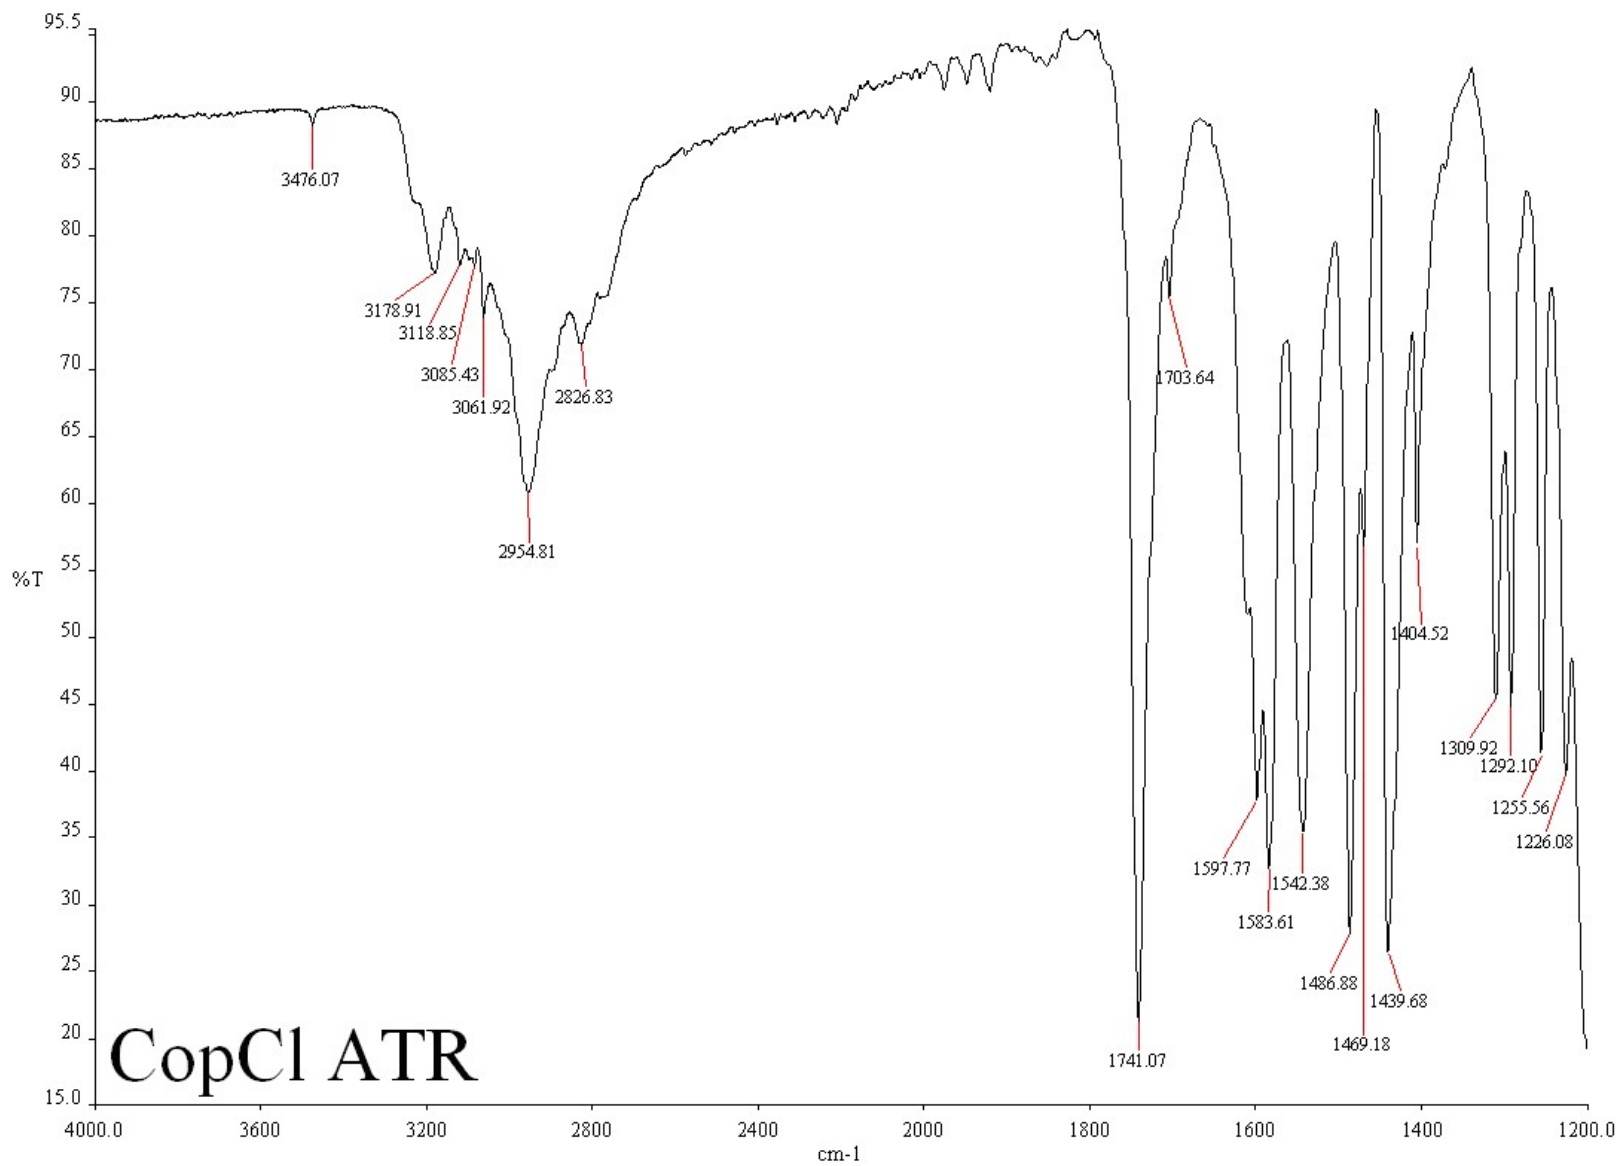

1.2.3.8. **ComCl**: 3477 (w), 3176 (w), 3103 (w), 2952 (m), 2822 (m), 2137 (w), 1740 (s), 1611 (m), 1584 (s), 1540 (s), 1475 (s), 1440 (s), 1429 (s).

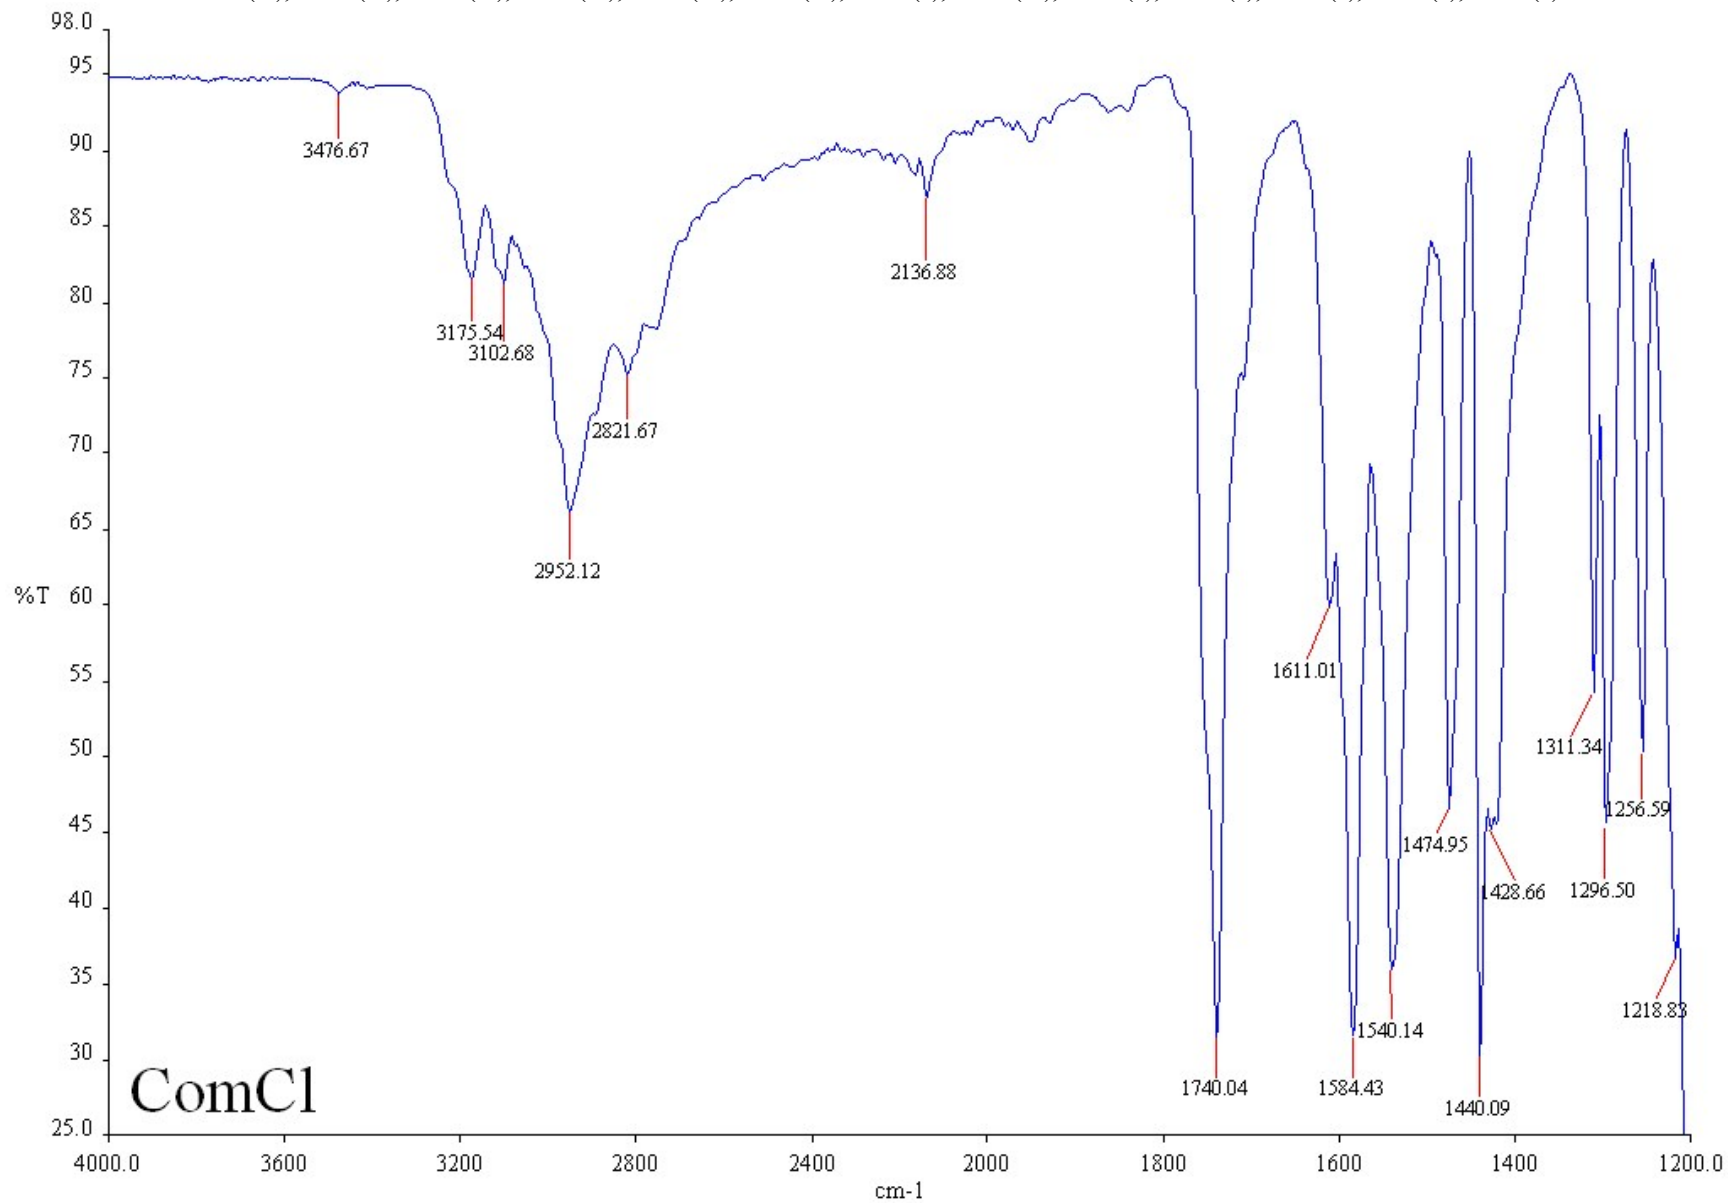

1.2.3.9. **CooCl**: 3176 (w), 3115 (w), 2949 (m), 2820 (m), 1743 (s), 1682 (w), 1592 (s), 1582 (s), 1542 (s), 1478 (s), 1438 (s).

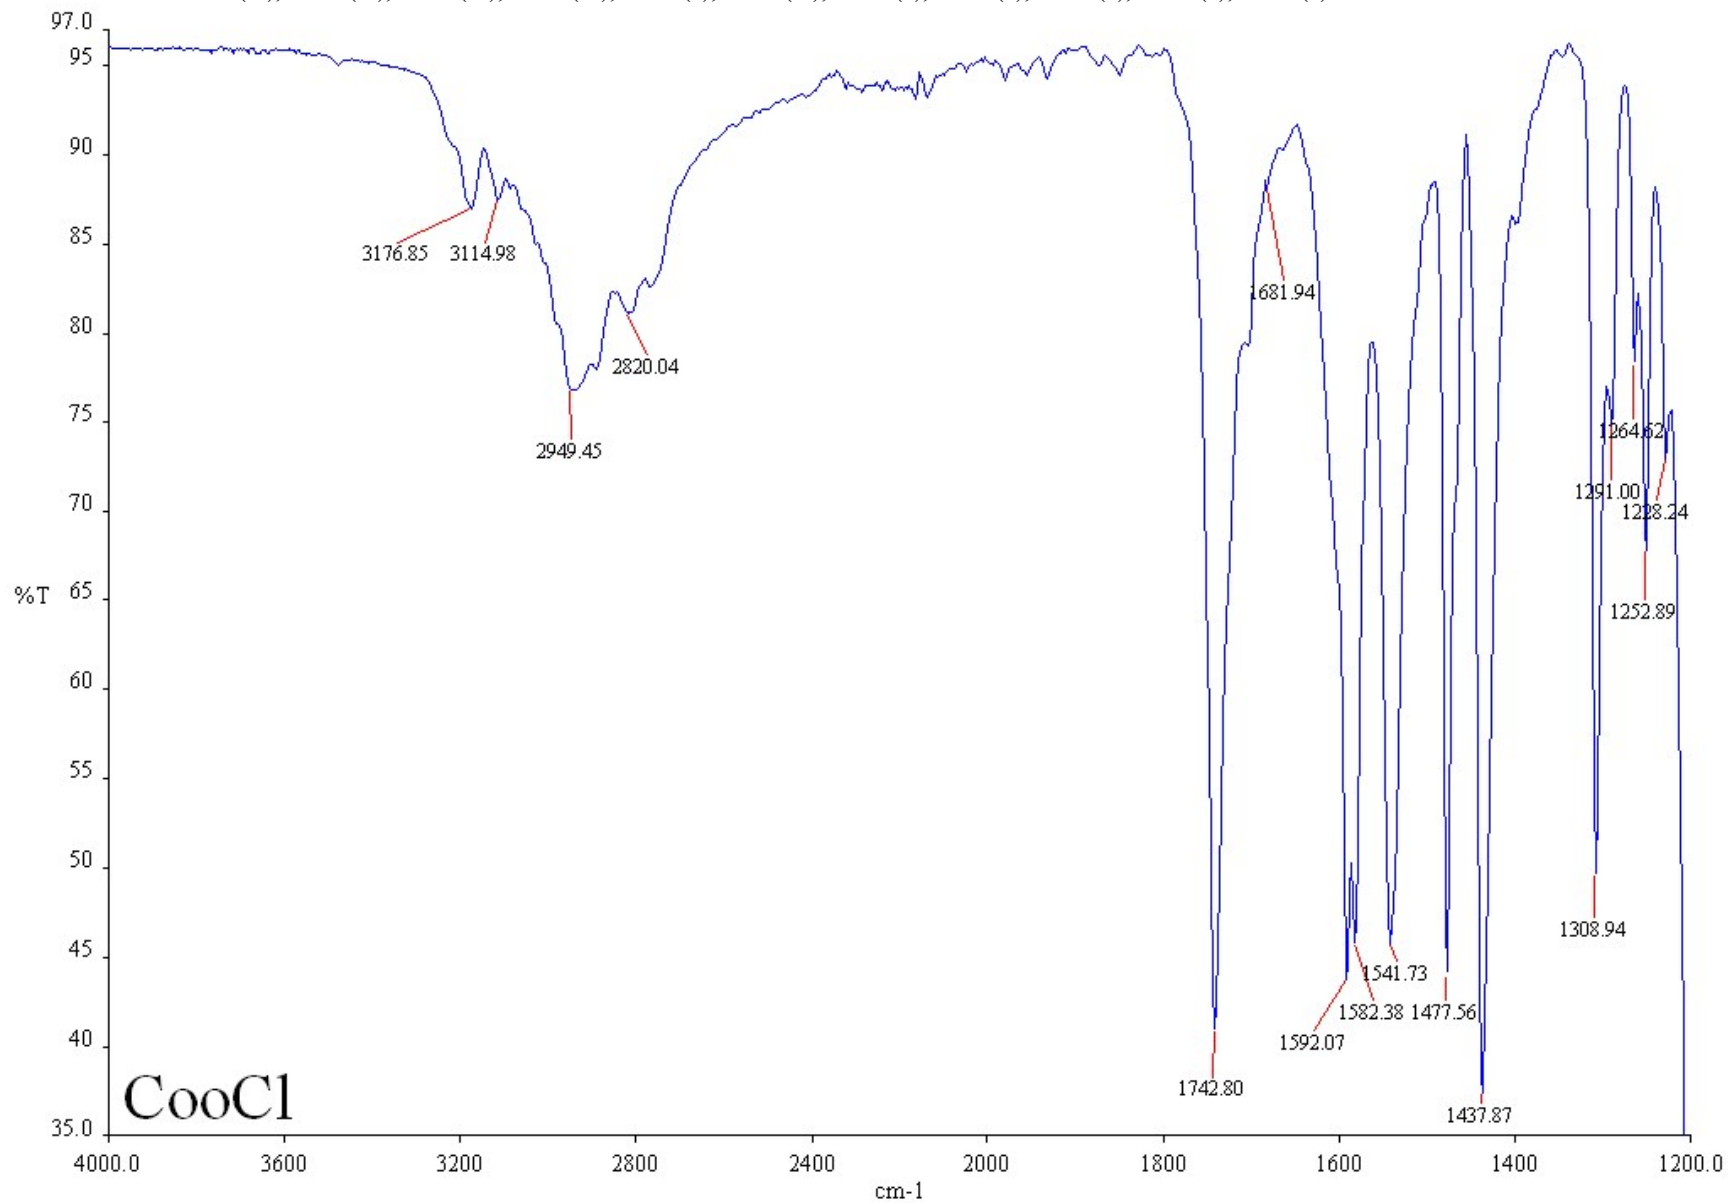

### 1.3. CxxBr isomer grid

**<sup>1</sup>H NMR data**      **pages 76-91**      (run in CD<sub>3</sub>COCD<sub>3</sub>, acetone-*d*<sub>6</sub> and CDCl<sub>3</sub>)  
**<sup>13</sup>C NMR data**      **pages 92-99**  
**Infra-red**      **pages 100-107**

*Ab Initio* calculations      pages      108-116

**1.3.1. <sup>1</sup>H NMR data and spectra (400 MHz)**

1.3.1.1. **CppBr** (Acetone-d<sub>6</sub>): δ 7.11 (2H, dt, <sup>3</sup>J = 8.9, <sup>4</sup>J = 2.7), 7.42 (2H, dd, <sup>3</sup>J = 4.8, <sup>4</sup>J = 1.6), 7.48 (2H, dt, <sup>3</sup>J = 8.9, <sup>4</sup>J = 2.7), 8.33 (2H, dd, <sup>3</sup>J = 4.8, <sup>4</sup>J = 1.6), 9.53 (1H, br s);

CppBr\_Acd6\_PM

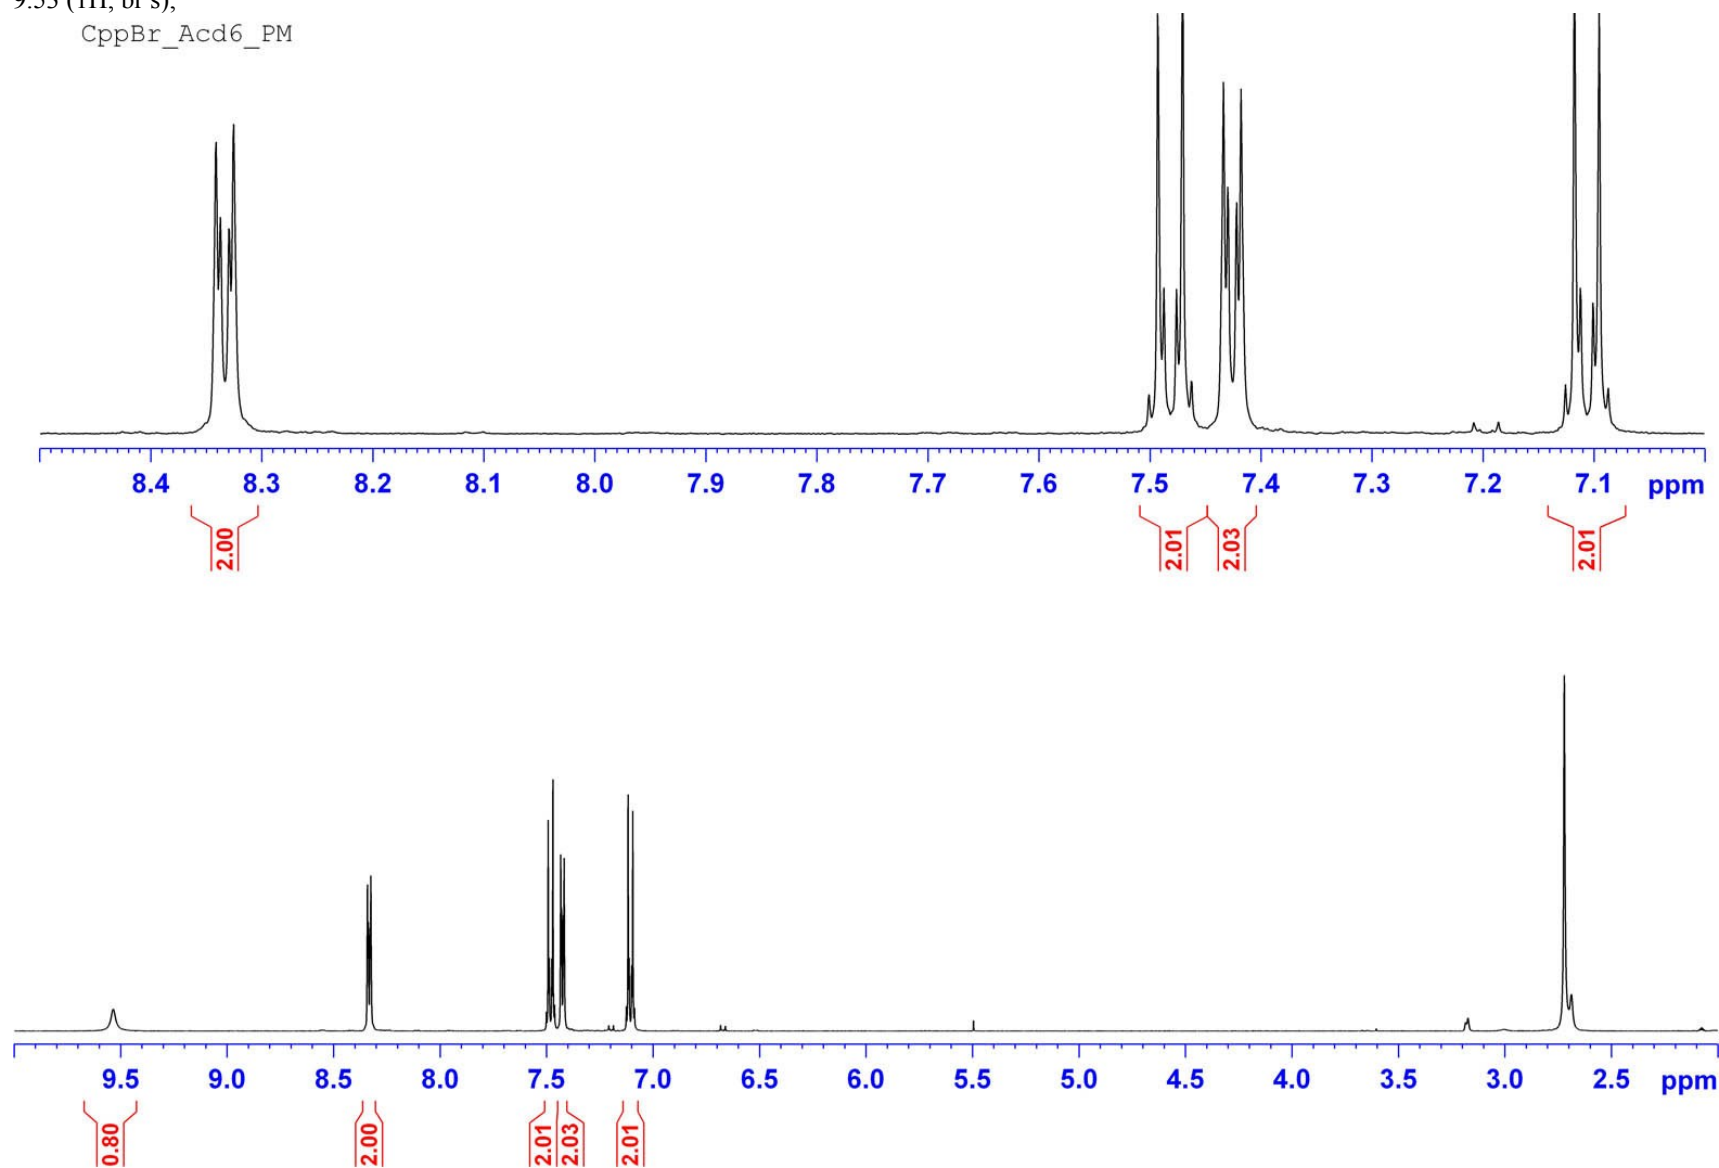



1.3.1.2. **CppBr** (CDCl<sub>3</sub>) δ 7.02 (2H, dt, <sup>3</sup>J = 8.8, <sup>4</sup>J = 2.5), 7.09 (1H, br s), 7.33 (2H, dd, <sup>3</sup>J = 5, <sup>4</sup>J = 1.6), 7.46 (2H, dt, <sup>3</sup>J = 8.9, <sup>4</sup>J = 2.7), 8.46 (2H, dd, <sup>3</sup>J = 5.1, <sup>4</sup>J = 1.6);

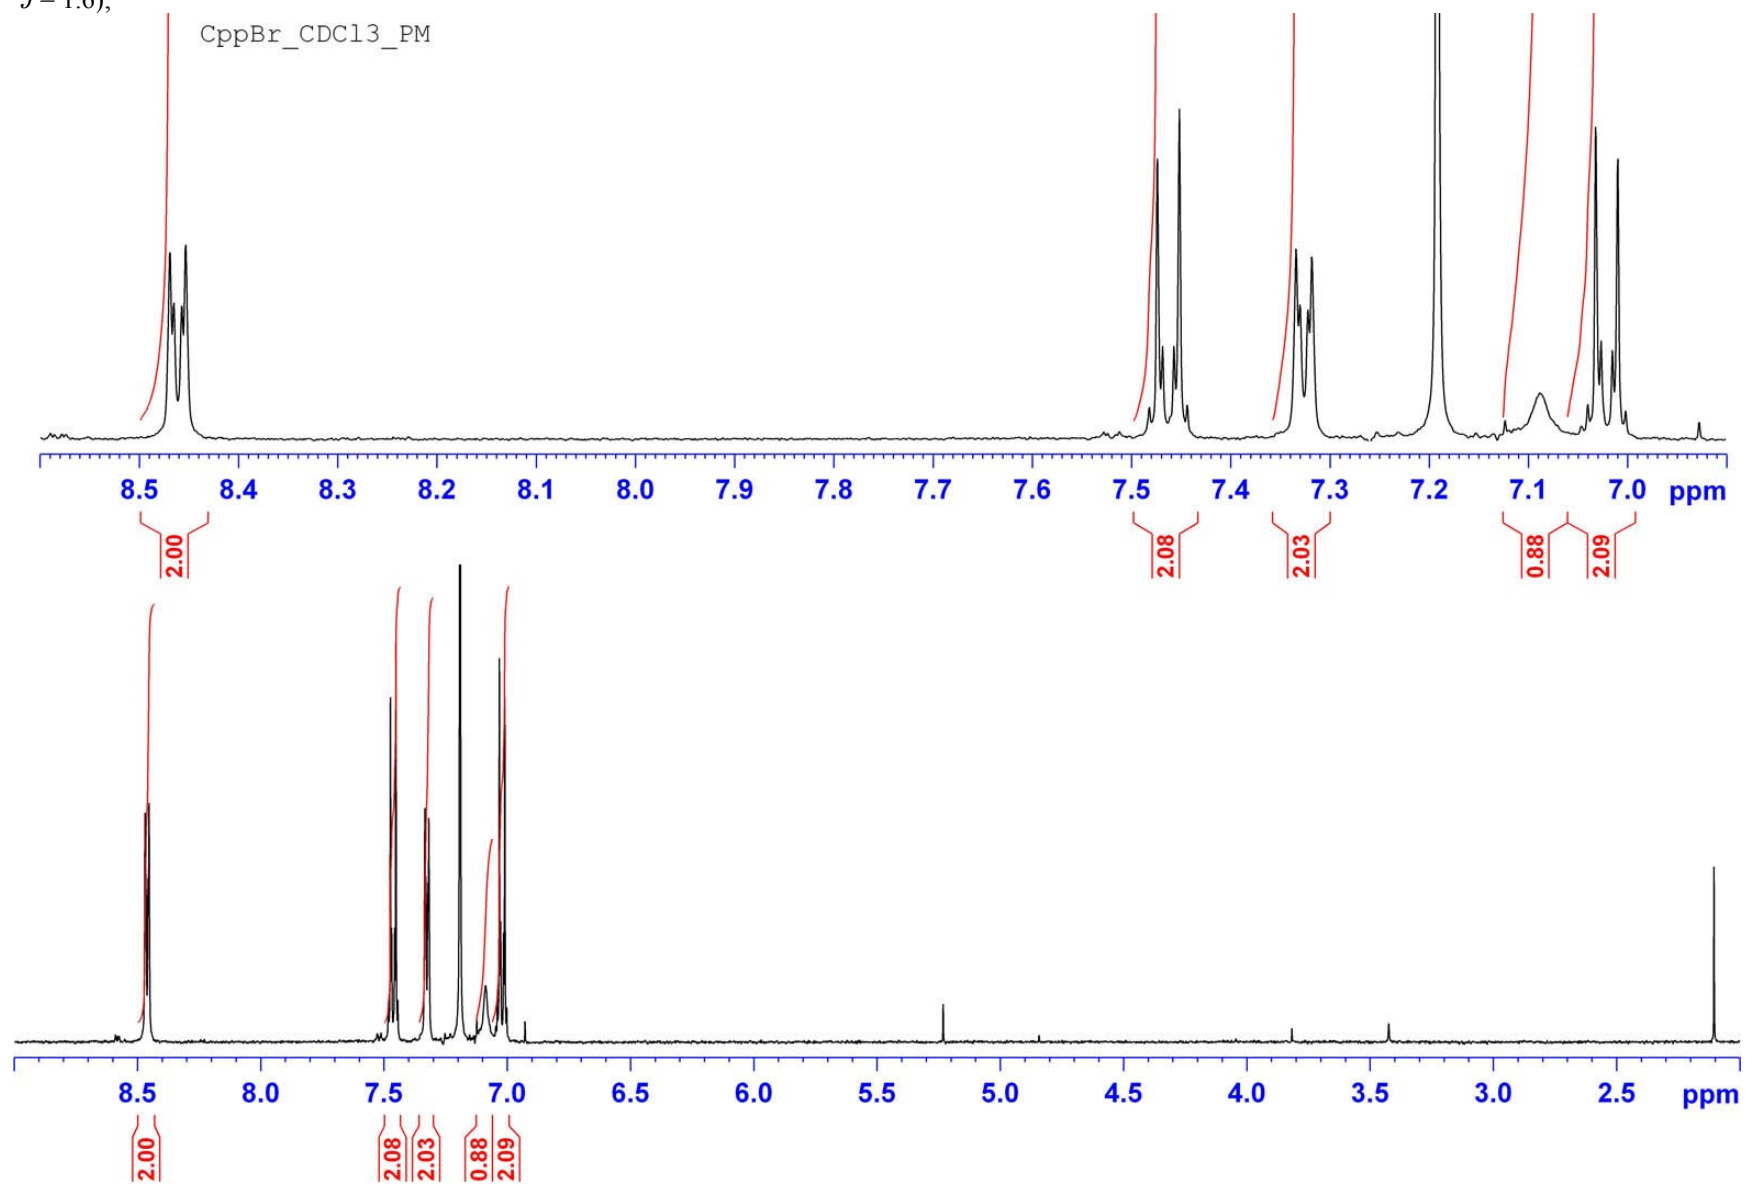

1.3.1.3. **CpmBr** (Acetone- $d_6$ ):  $\delta$  7.15 (1H, ddd,  $^3J=8.3$ ,  $^4J=2.0$ ,  $^5J=0.6$ ), 7.28 (1H, t,  $^3J=8.1$ ), 7.35 (1H, d,  $^3J=8.0$ ), 7.39 (1H, t,  $^3J=2.1$ ), 7.43 (2H, dd,  $^3J=5.0$ ,  $^4J=1.6$ ), 8.34 (2H, dd,  $^3J=4.7$ ,  $^4J=1.5$ ), 9.54 (1H, br s);

CpmBr\_HNMR\_Acd6

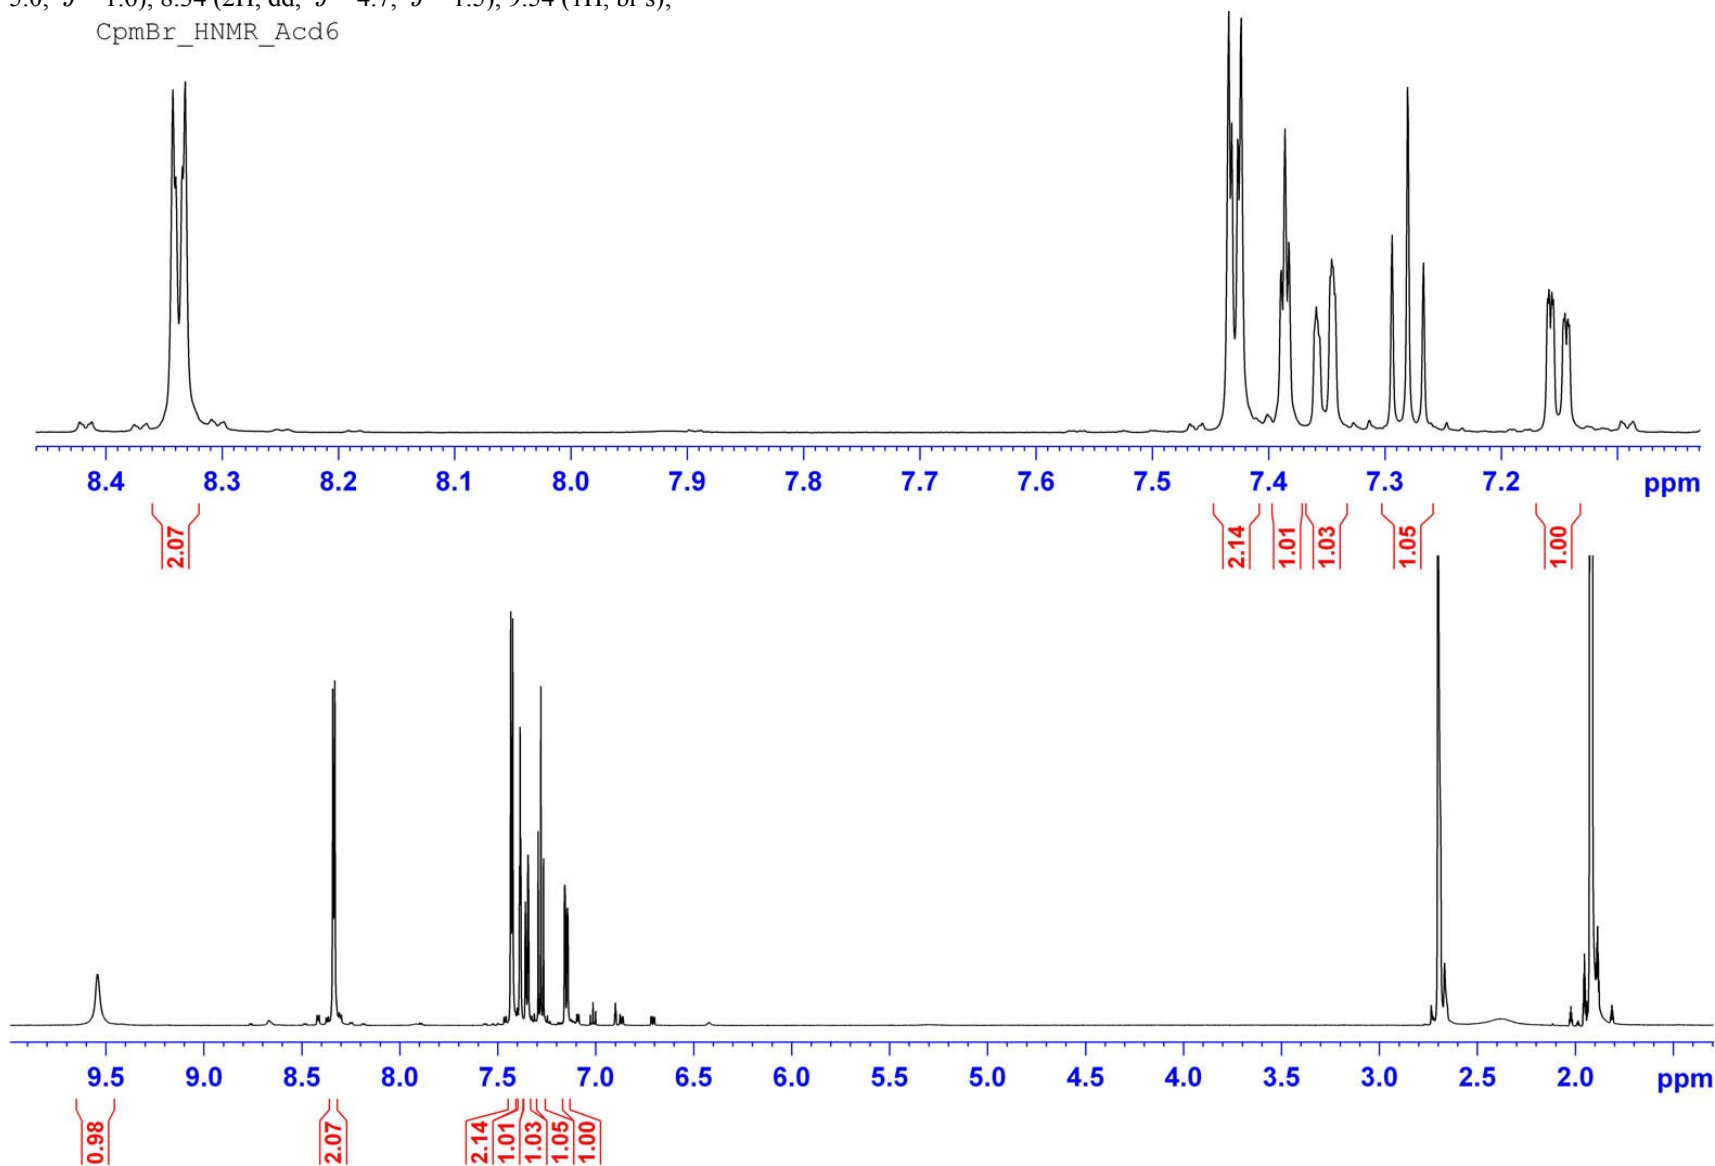

1.3.1.4. **CpmBr** (CDCl<sub>3</sub>) δ 7.09 (1H, ddd, <sup>3</sup>J = 8.3, <sup>4</sup>J = 2.3, <sup>5</sup>J = 1.0), 7.22 (1H, t, <sup>3</sup>J = 8.1; includes residual CHCl<sub>3</sub> solvent), 7.27 (1H, br s), 7.32 (1H, t, <sup>3</sup>J = 2.1), 7.36 (3H, m), 8.46 (2H, d, <sup>3</sup>J = 4.8);

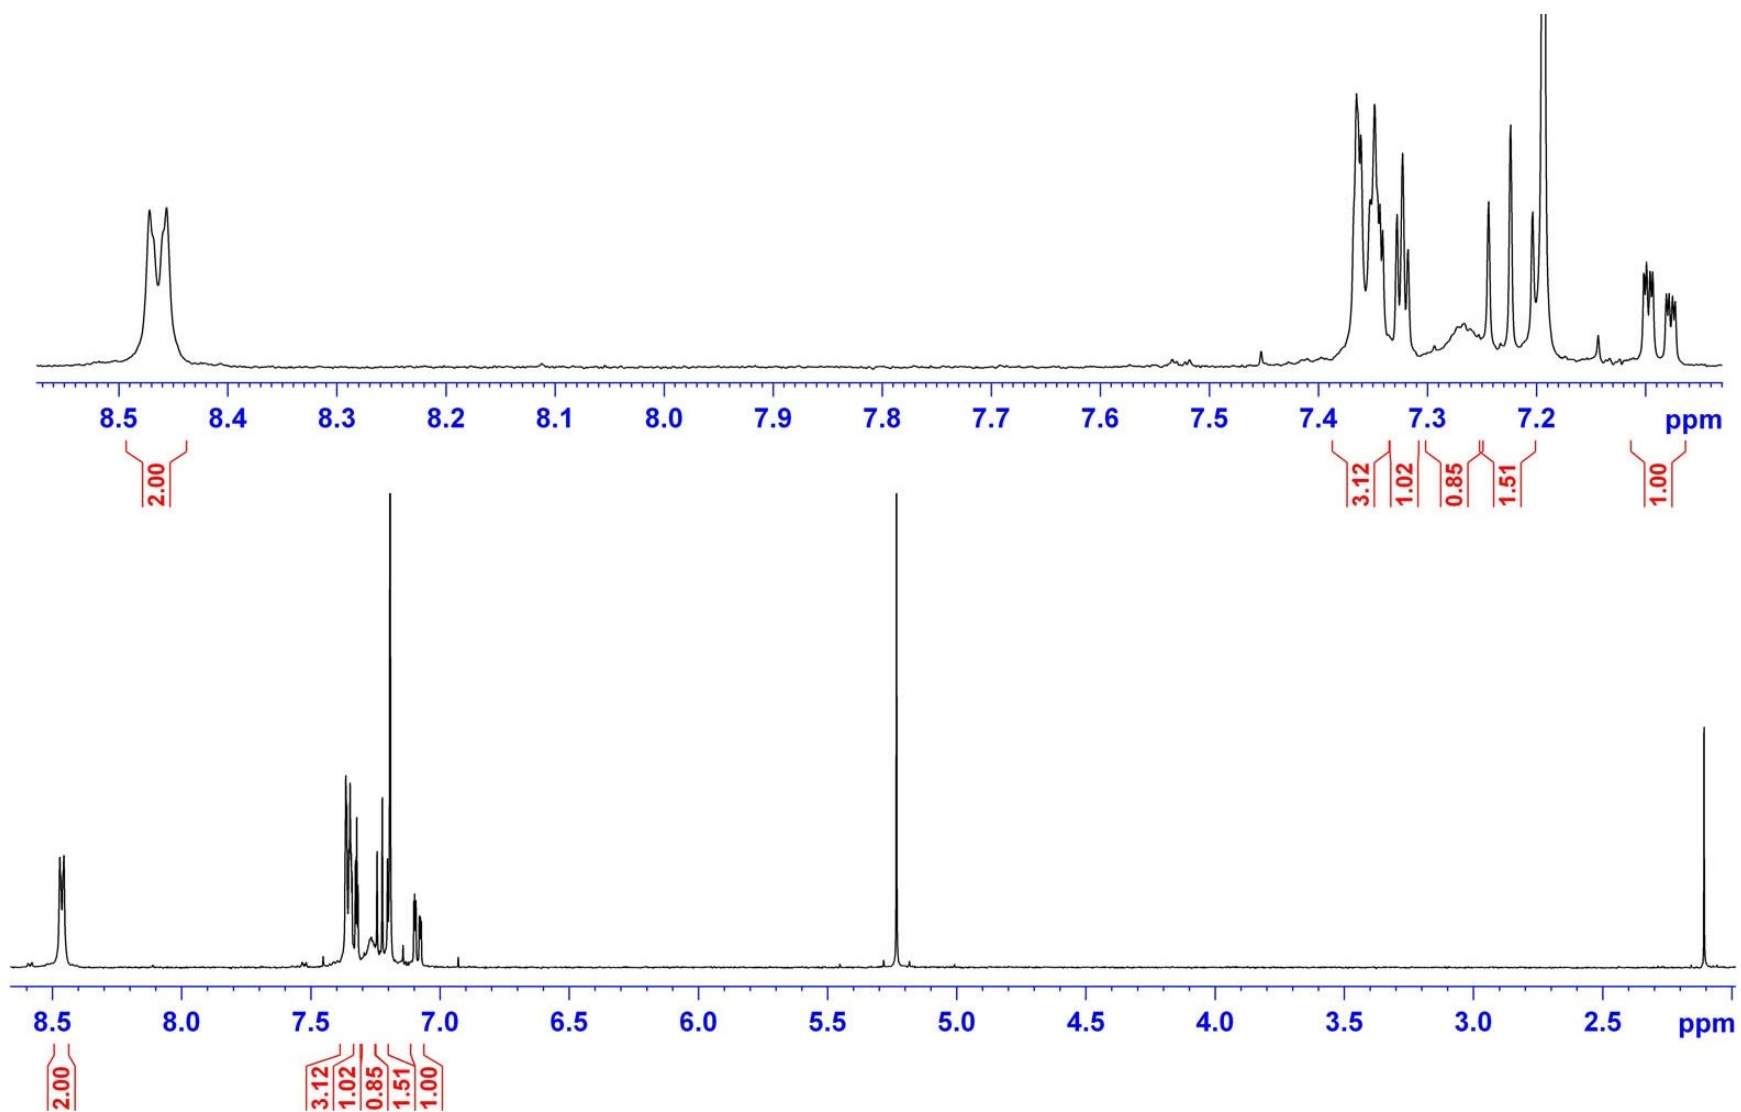

1.3.1.5. **CpoBr** (600 MHz, Acetone- $d_6$ ):  $\delta$  7.29 (1H, td,  $^3J = 7.8$ ,  $^4J = 1.5$ ), 7.42 (1H, dd,  $^3J = 8.0$ ,  $^4J = 1.5$ ), 7.50 (1H, td,  $^3J = 7.7$ ,  $^4J = 1.3$ ), 7.60 (2H, dd,  $^3J = 5.0$ ,  $^4J = 1.5$ ), 7.74 (1H, dd,  $^3J = 8.0$ ,  $^4J = 1.5$ ), 8.50 (2H, dd,  $^3J = 4.8$ ), 9.86 (1H, br s);

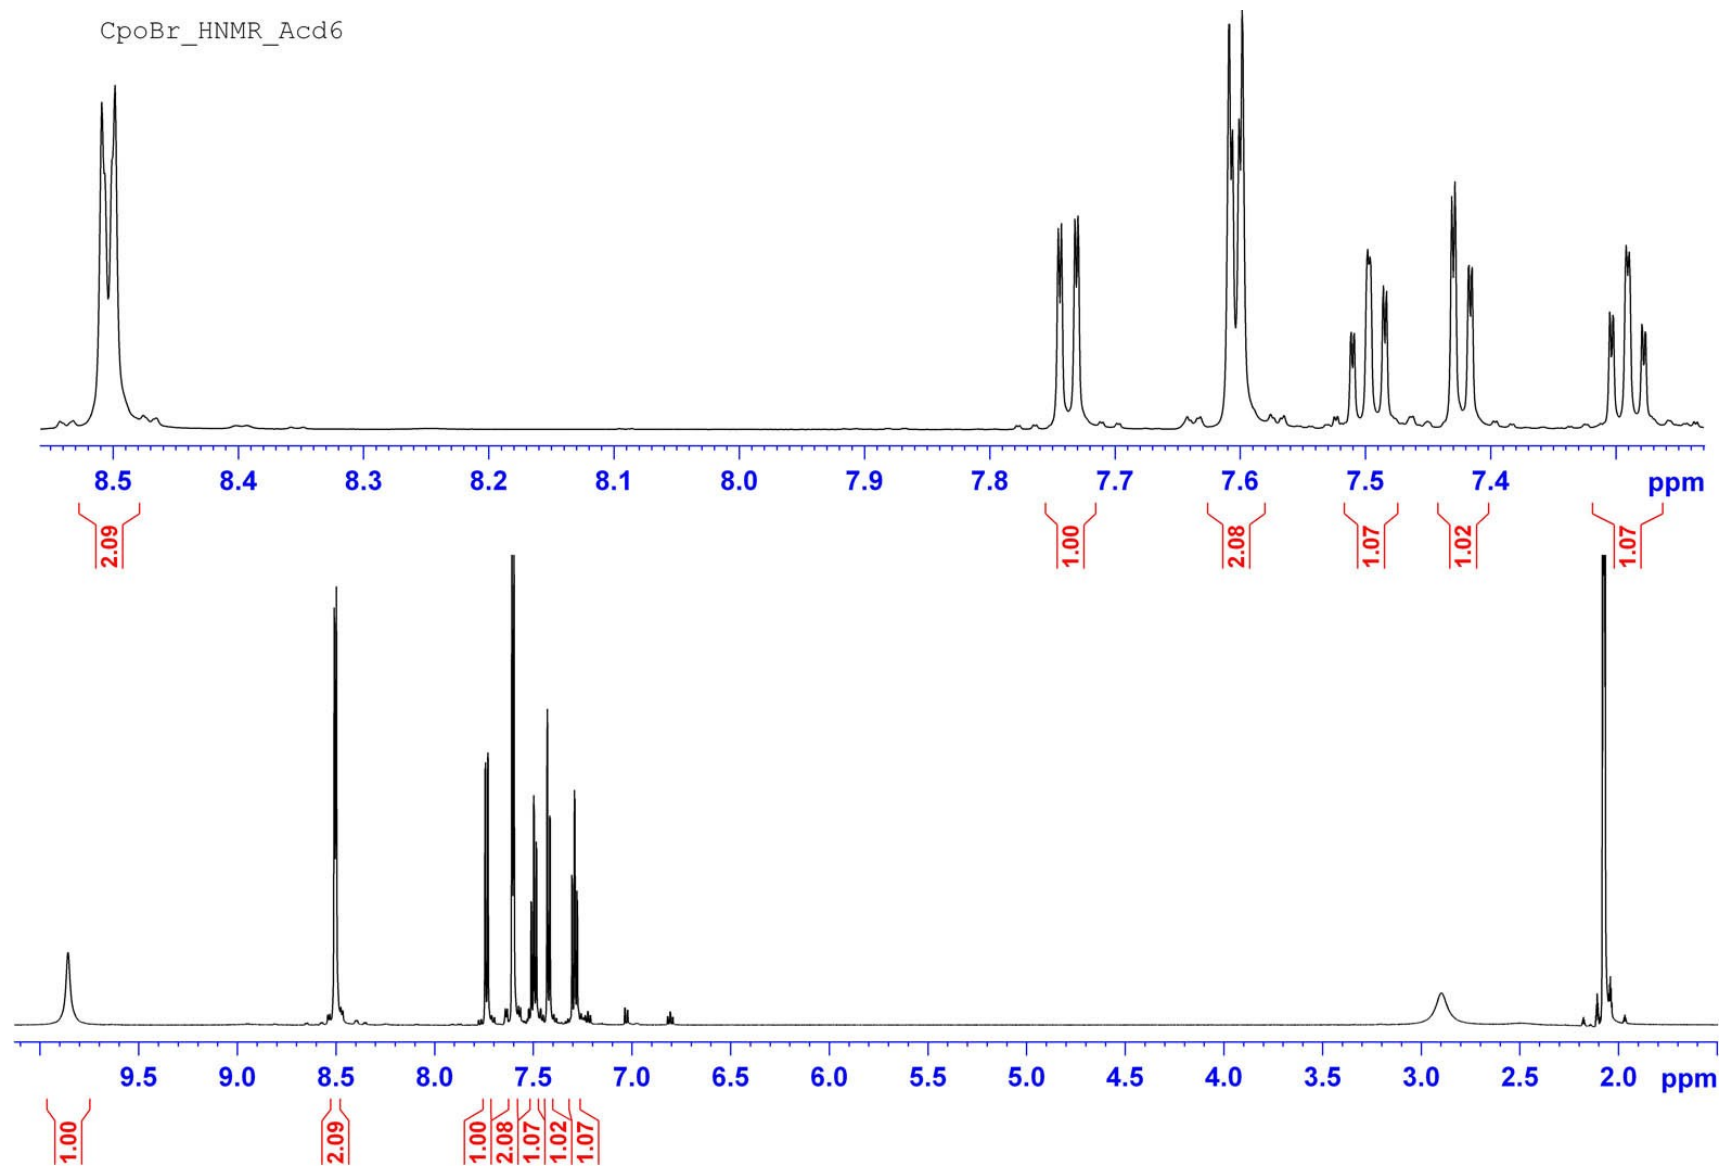

1.3.1.6. **CpoBr** (CDCl<sub>3</sub>) δ 7.19 (1H, td, <sup>3</sup>J = 7.7, <sup>4</sup>J = 1.6), 7.28 (1H, dd, <sup>3</sup>J = 8.0, <sup>4</sup>J = 1.5; includes CHCl<sub>3</sub> residual solvent), 7.39 (1H, ddd, <sup>3</sup>J = 8.5, <sup>4</sup>J = 7.4, <sup>5</sup>J = 1.5), 7.51 (2H, dd, <sup>3</sup>J = 4.6, <sup>4</sup>J = 1.5), 7.66 (1H, dd, <sup>3</sup>J = 8.1, <sup>4</sup>J = 1.5), 8.22 (1H, br s), 8.55 (2H, dd, <sup>3</sup>J = 4.9, <sup>4</sup>J = 1.6);

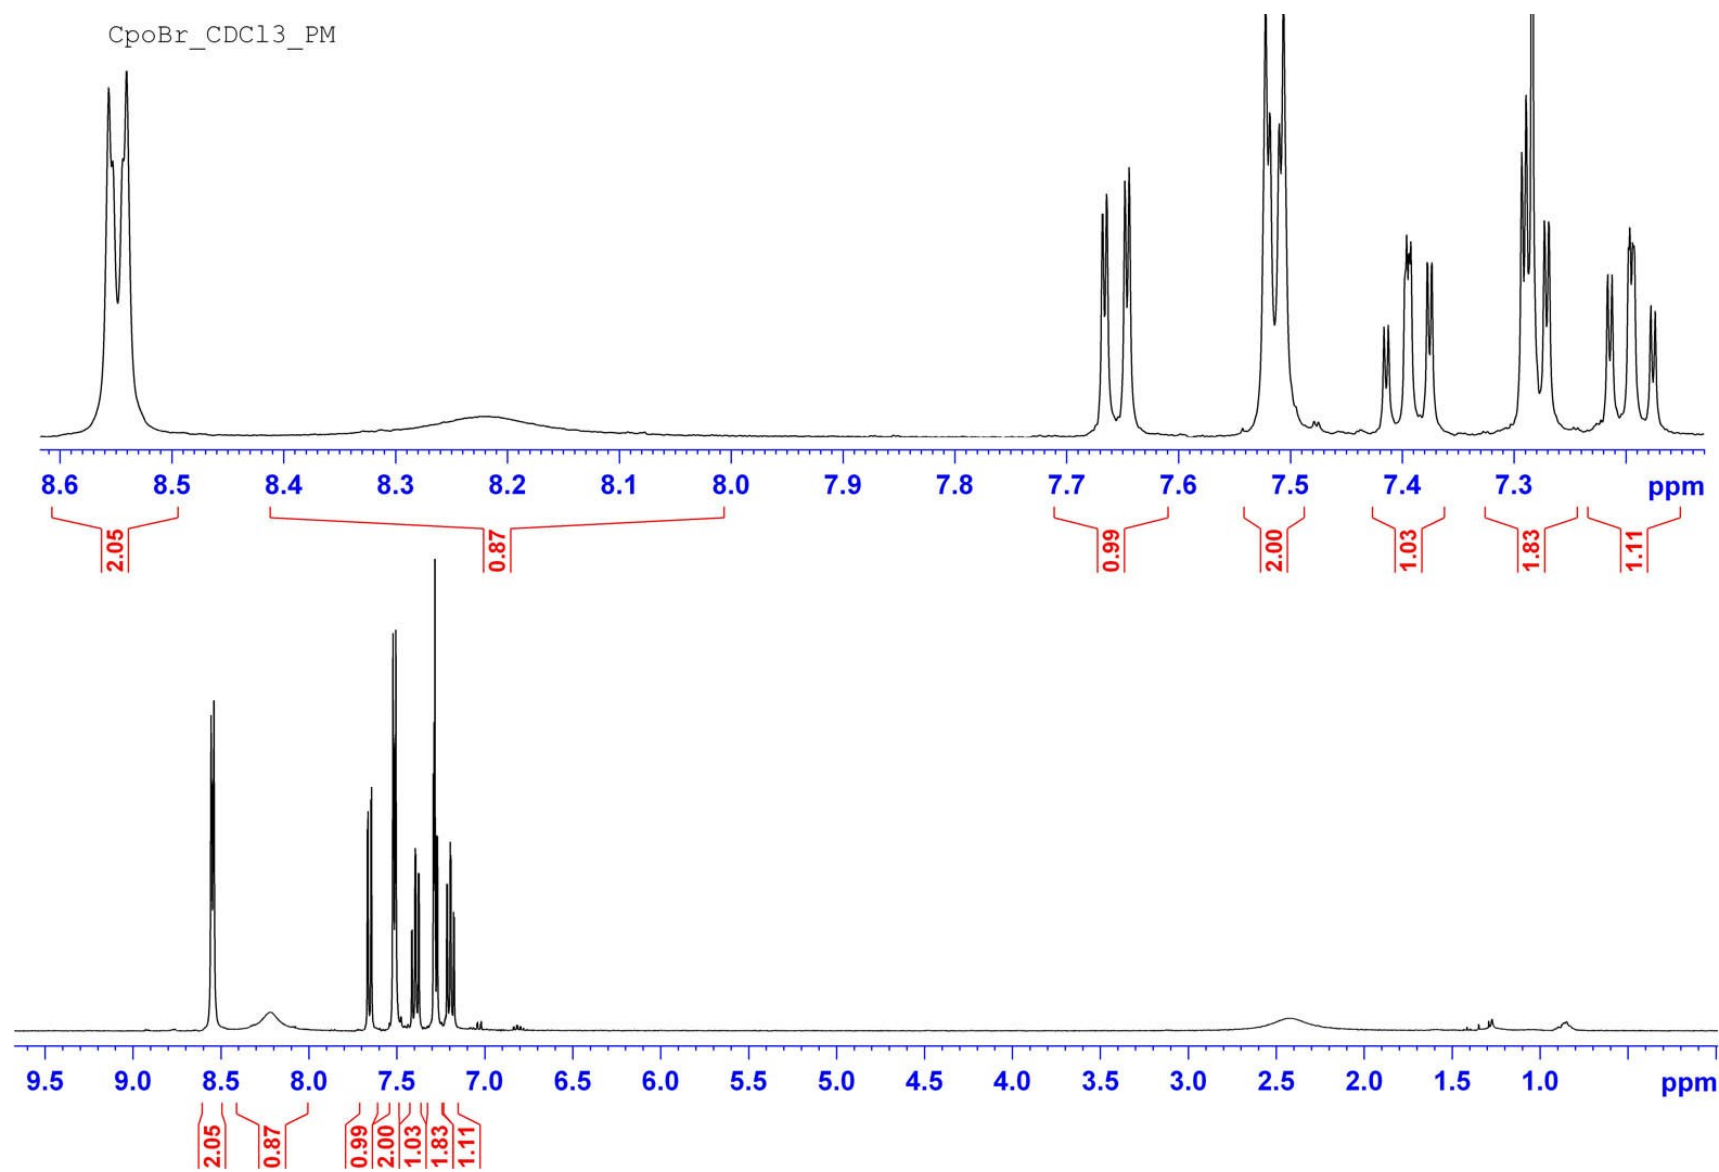

1.3.1.7. **CmpBr** (Acetone- $d_6$ ):  $\delta$  7.24 (2H, dt,  $^3J=8.8$ ,  $^4J=2.7$ ), 7.37 (1H, dd,  $^3J=8.4$ ,  $^4J=4.7$ ), 7.62 (2H, dt,  $^3J=8.9$ ,  $^4J=2.7$ ), 8.07 (1H, ddd,  $^3J=8.4$ ,  $^4J=2.9$ ,  $^5J=1.3$ ), 8.33 (1H, dd,  $^3J=4.7$ ,  $^4J=1.3$ ), 8.78 (1H, d,  $^3J=2.3$ ), 9.49 (1H, br s);

CmpBr\_Acd6\_PM

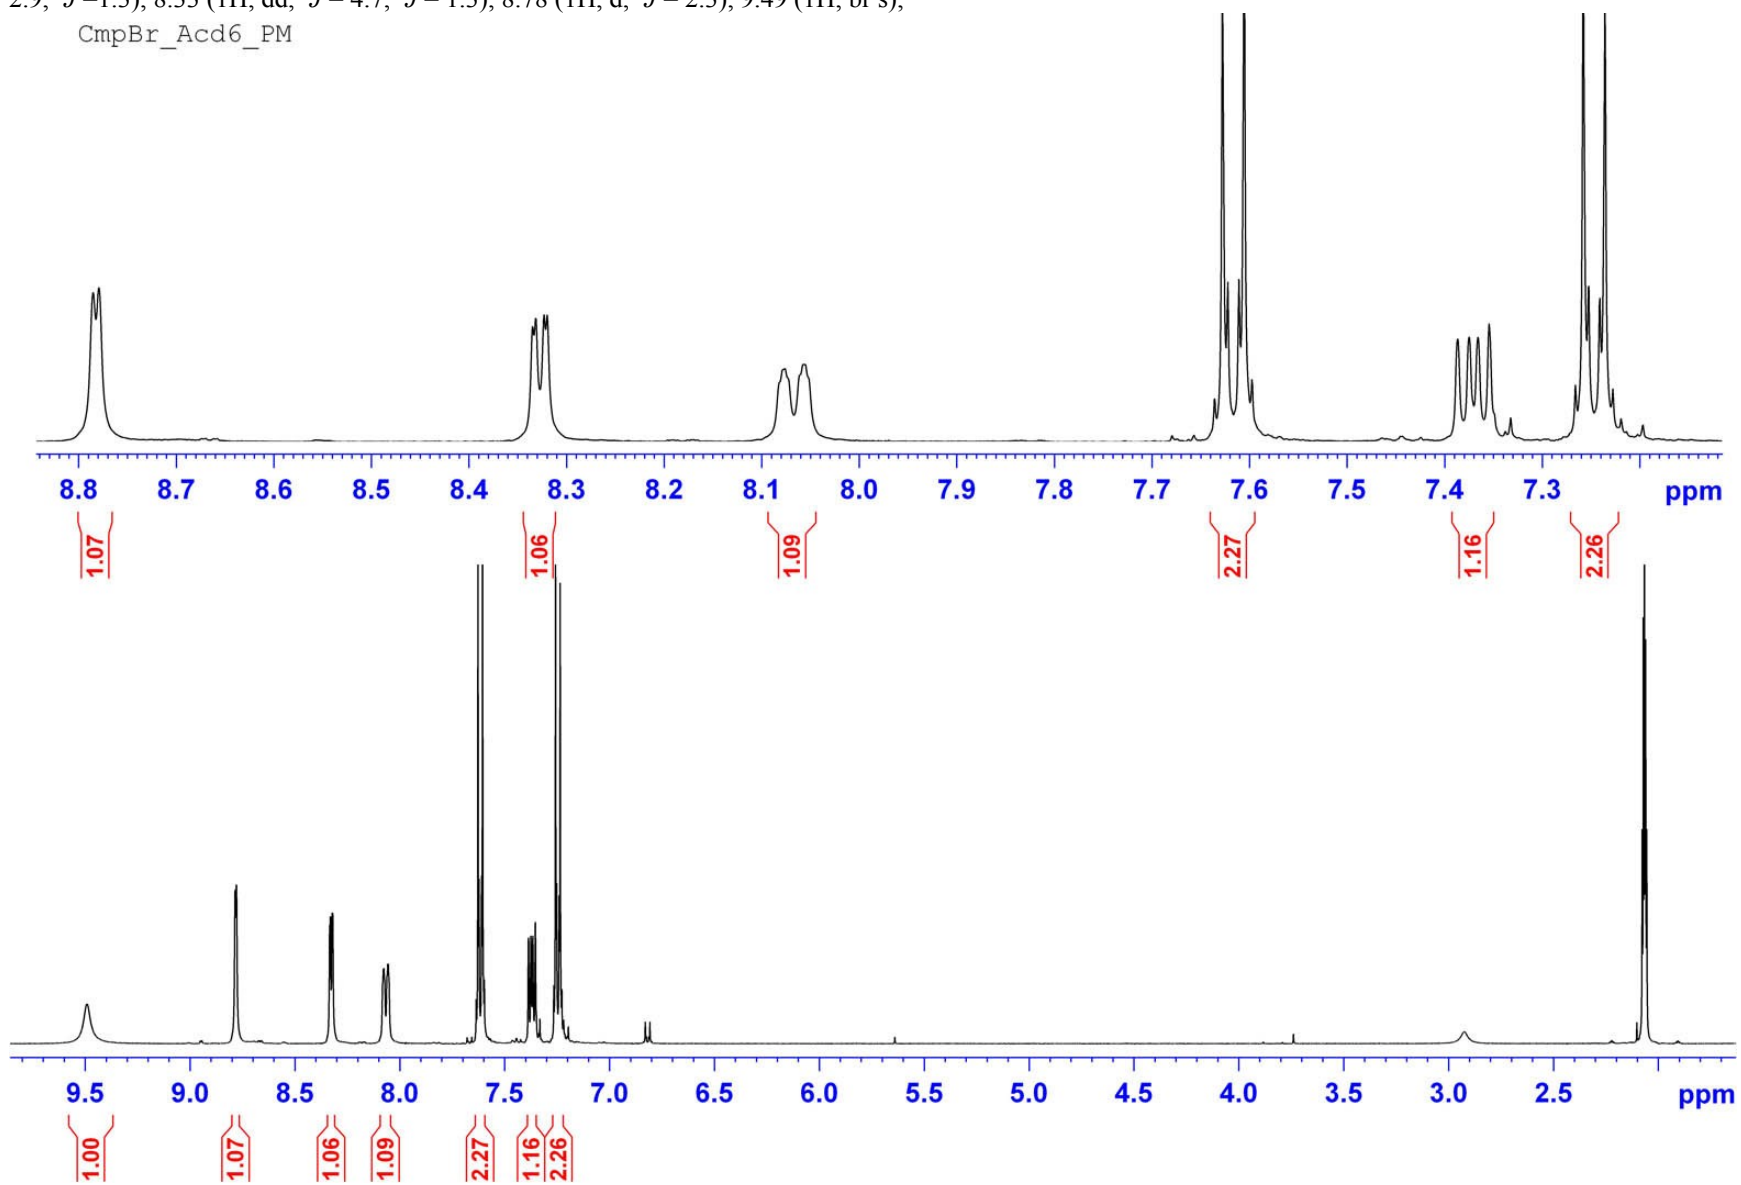

1.3.1.8. **CmpBr** (CDCl<sub>3</sub>) δ 7.02 (2H, dt, <sup>3</sup>J = 8.9, <sup>4</sup>J = 2.6), 7.26 (1H, dd, <sup>3</sup>J = 8.6, <sup>4</sup>J = 4.8), 7.45 (2H, dt, <sup>3</sup>J = 8.9, <sup>4</sup>J = 2.6); 7.83 (1H, br s), 8.05 (1H, d, <sup>3</sup>J = 7.2), 8.32 (1H, s), 8.55 (1H, s);  
CmpBr\_CDCl3\_PM

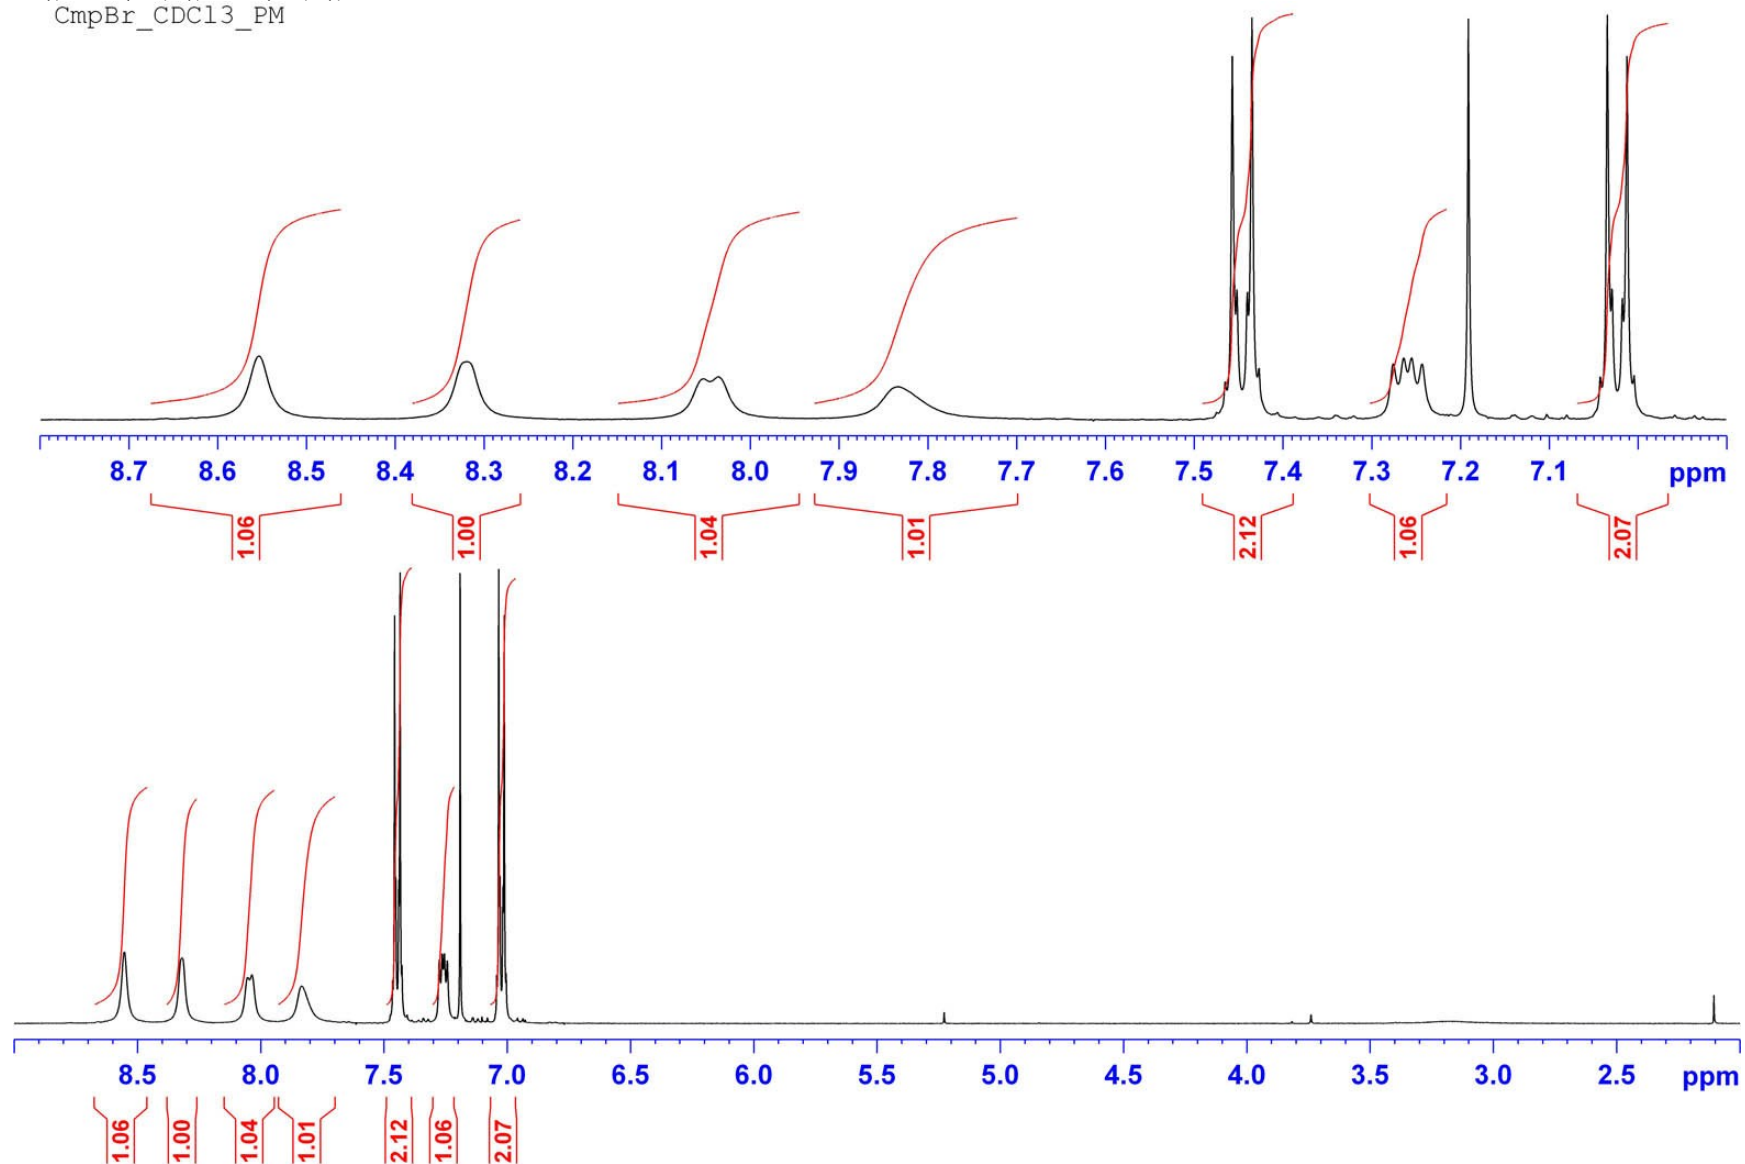

1.3.1.9. **CmmBr** (Acetone- $d_6$ ):  $\delta$  7.41 (1H, dd,  $^3J = 8.3$ ,  $^4J = 1.8$ ), 7.49 (1H, dd,  $^3J = 8.4$ ,  $^4J = 4.6$ ), 7.53 (1H, t,  $^3J = 8.0$ ), 7.60 (1H, d,  $^3J = 8.0$ ), 7.64 (1H, t,  $^3J = 1.8$ ), 8.19 (1H, d,  $^3J = 8.1$ ), 8.45 (1H, d,  $^3J = 4.8$ ), 8.91 (1H, d,  $^3J = 1.9$ ), 9.66 (1H, br s);

CmmBr\_HNMR\_Acd6

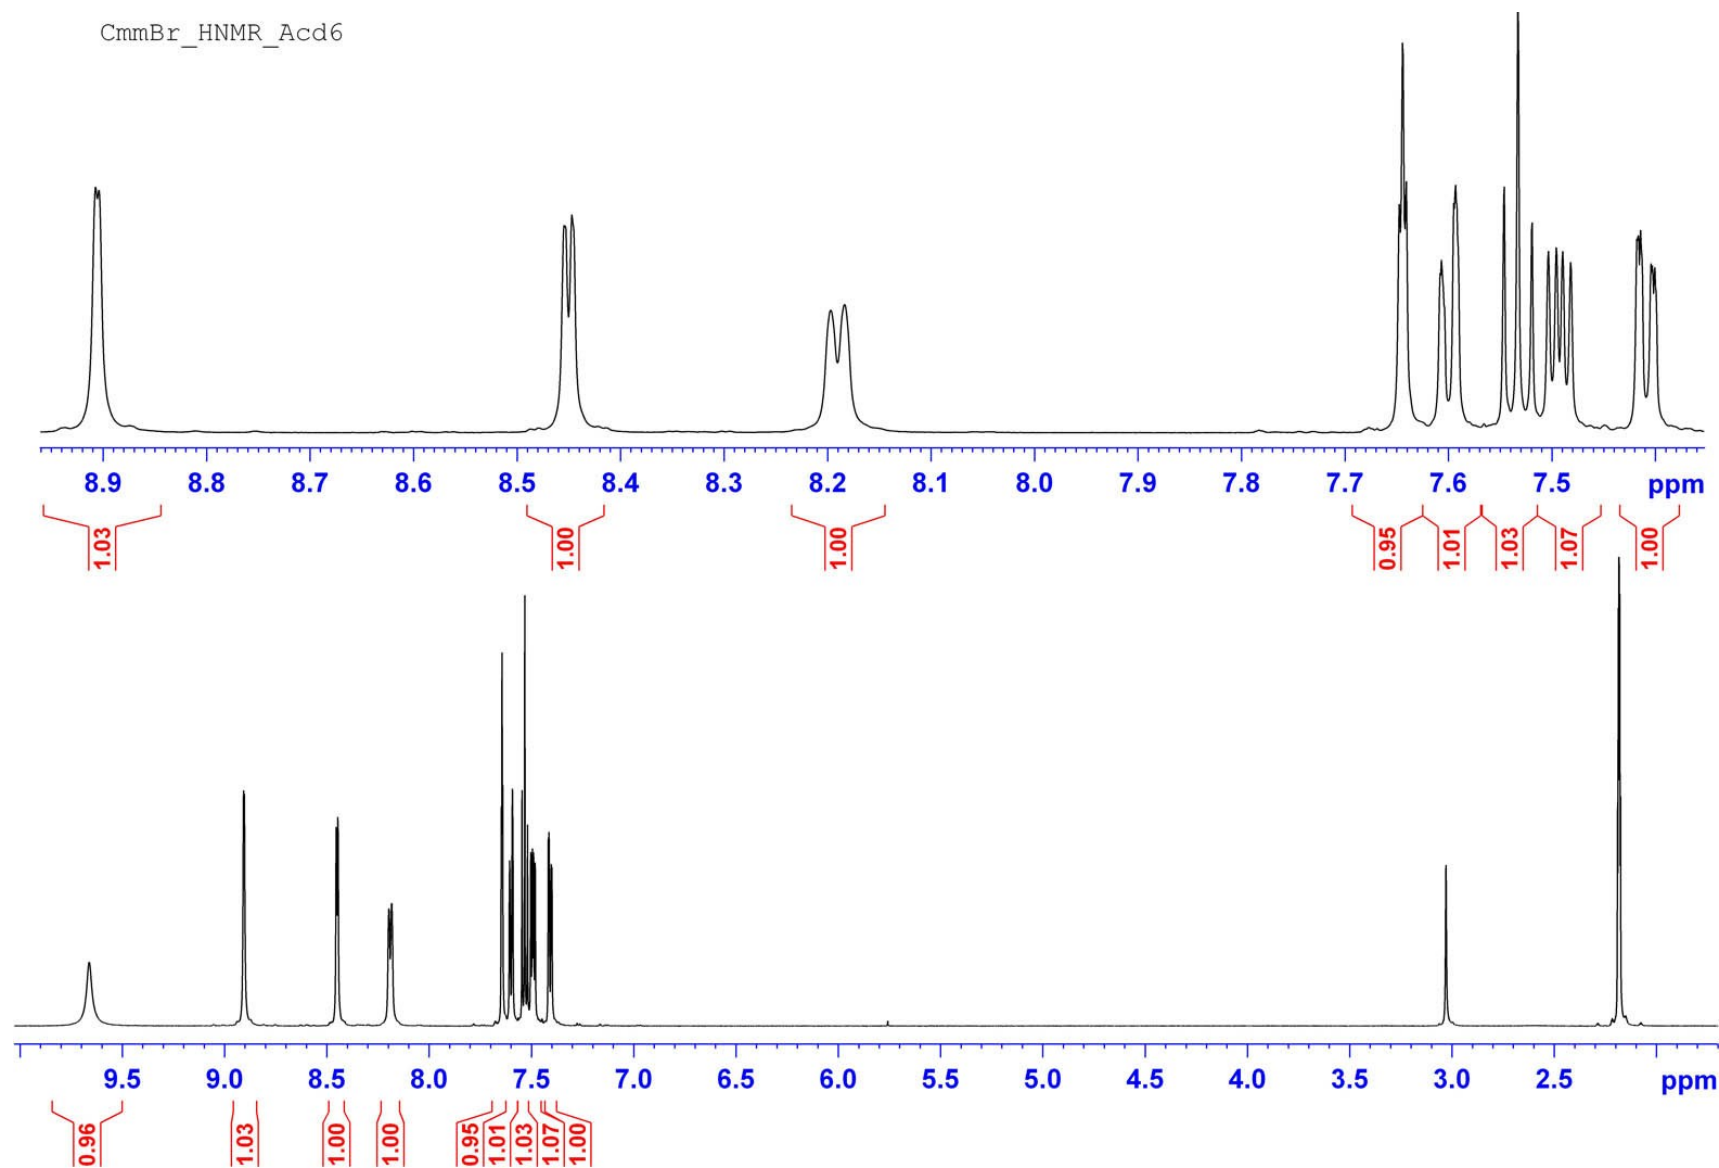



1.3.1.10. **CmmBr** (CDCl<sub>3</sub>) δ 7.18 (1H, ddd, <sup>3</sup>J = 8.2, <sup>4</sup>J = 2.2, <sup>5</sup>J = 1), 7.30 (1H, t, <sup>3</sup>J = 8.3; includes residual CHCl<sub>3</sub> solvent), 7.36 (1H, dd, <sup>3</sup>J = 8.6, <sup>4</sup>J = 4.8), 7.42 (2, m), 8.08 (1H, br s), 8.16 (1H, d, <sup>3</sup>J = 7.0), 8.41 (1H, d, <sup>3</sup>J = 4.4), 8.66 (1H, d, <sup>3</sup>J = 2.3);

CmmBr\_CDCl3\_PM

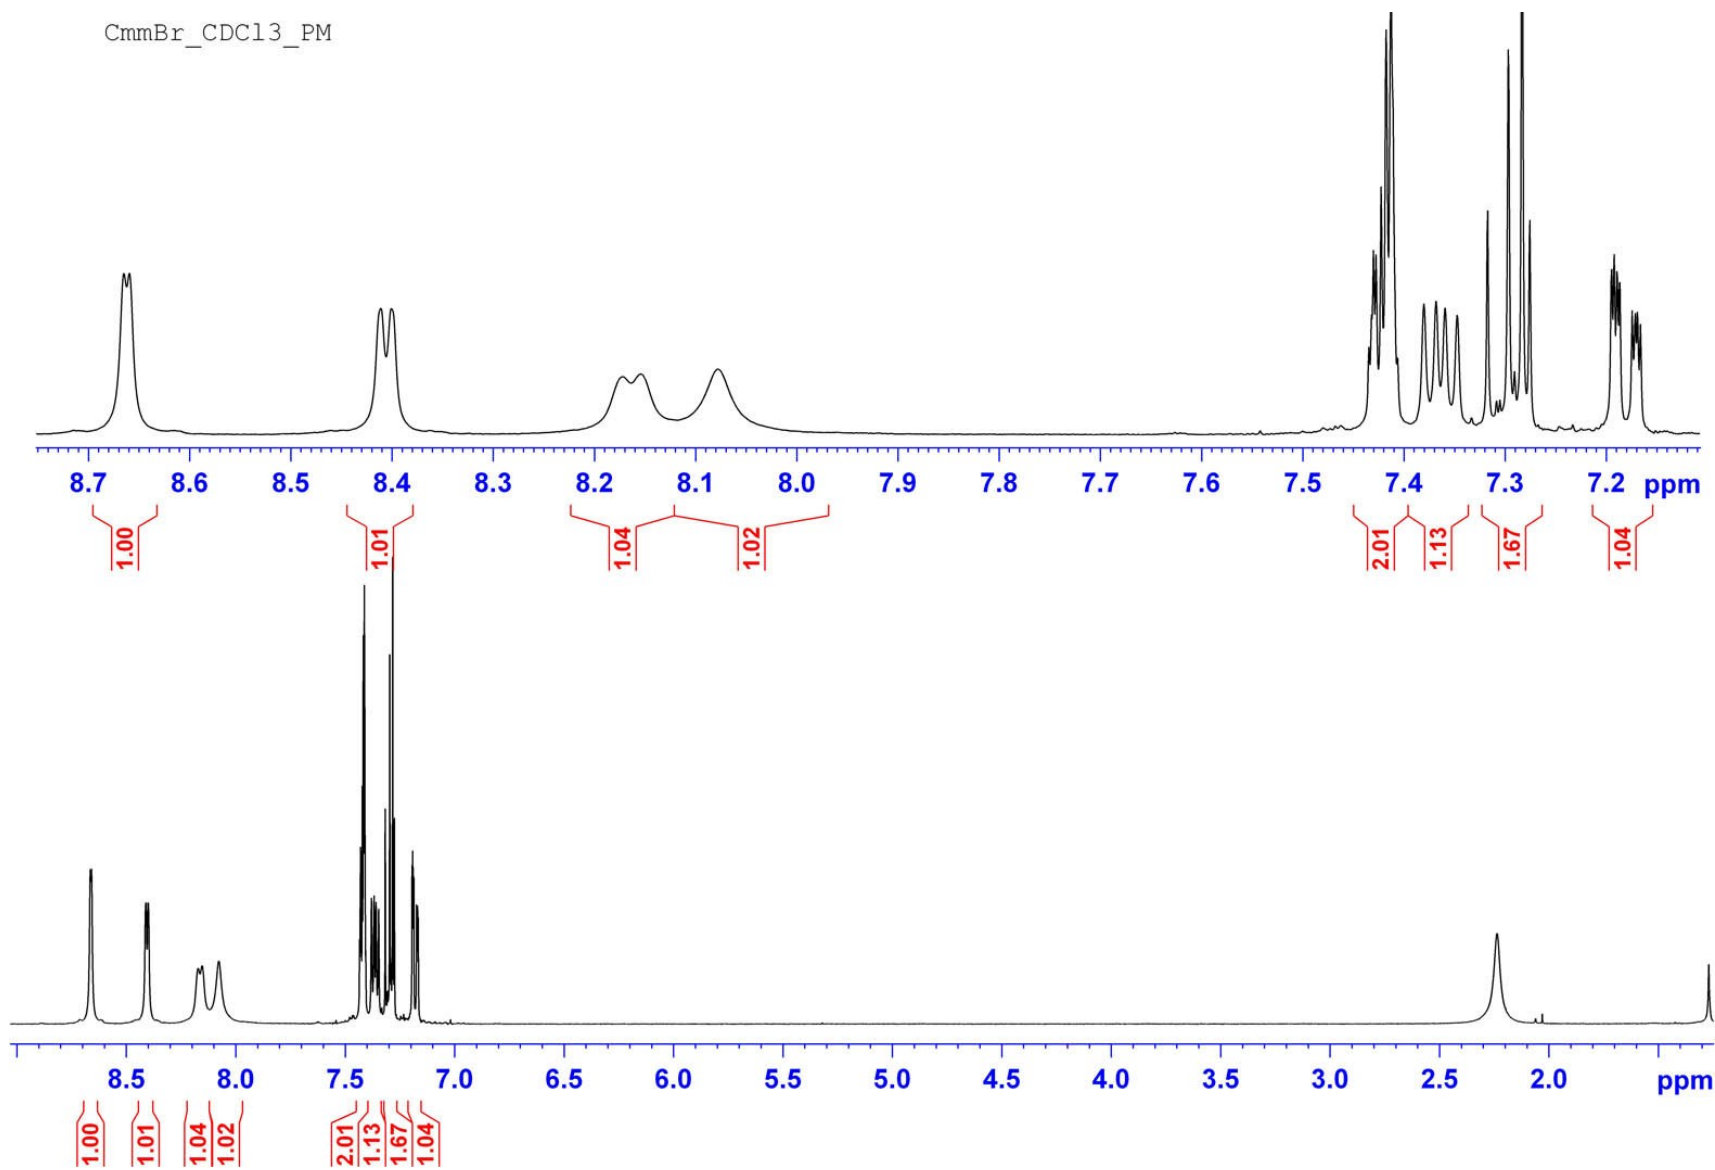

1.3.1.11. **CmoBr** (Acetone- $d_6$ ):  $\delta$  7.27 (1H, td,  $^3J = 7.7$ ,  $^4J = 1.5$ ), 7.40 (1H, dd,  $^3J = 8.2$ ,  $^4J = 4.6$ ), 7.41 (1H, dd,  $^3J = 8.1$ ,  $^4J = 1.5$ ), 7.49 (1H, ddd,  $^3J = 8.4$ ,  $^4J = 7.8$ ,  $^5J = 1.4$ ), 7.73 (1H, dd,  $^3J = 8.0$ ,  $^4J = 1.5$ ), 8.10 (1H, d,  $^3J = 8.1$ ), 8.35 (1H, s), 8.83 (1H, s), 9.67 (1H, br s);

CmoBr\_HNMR\_Acd6

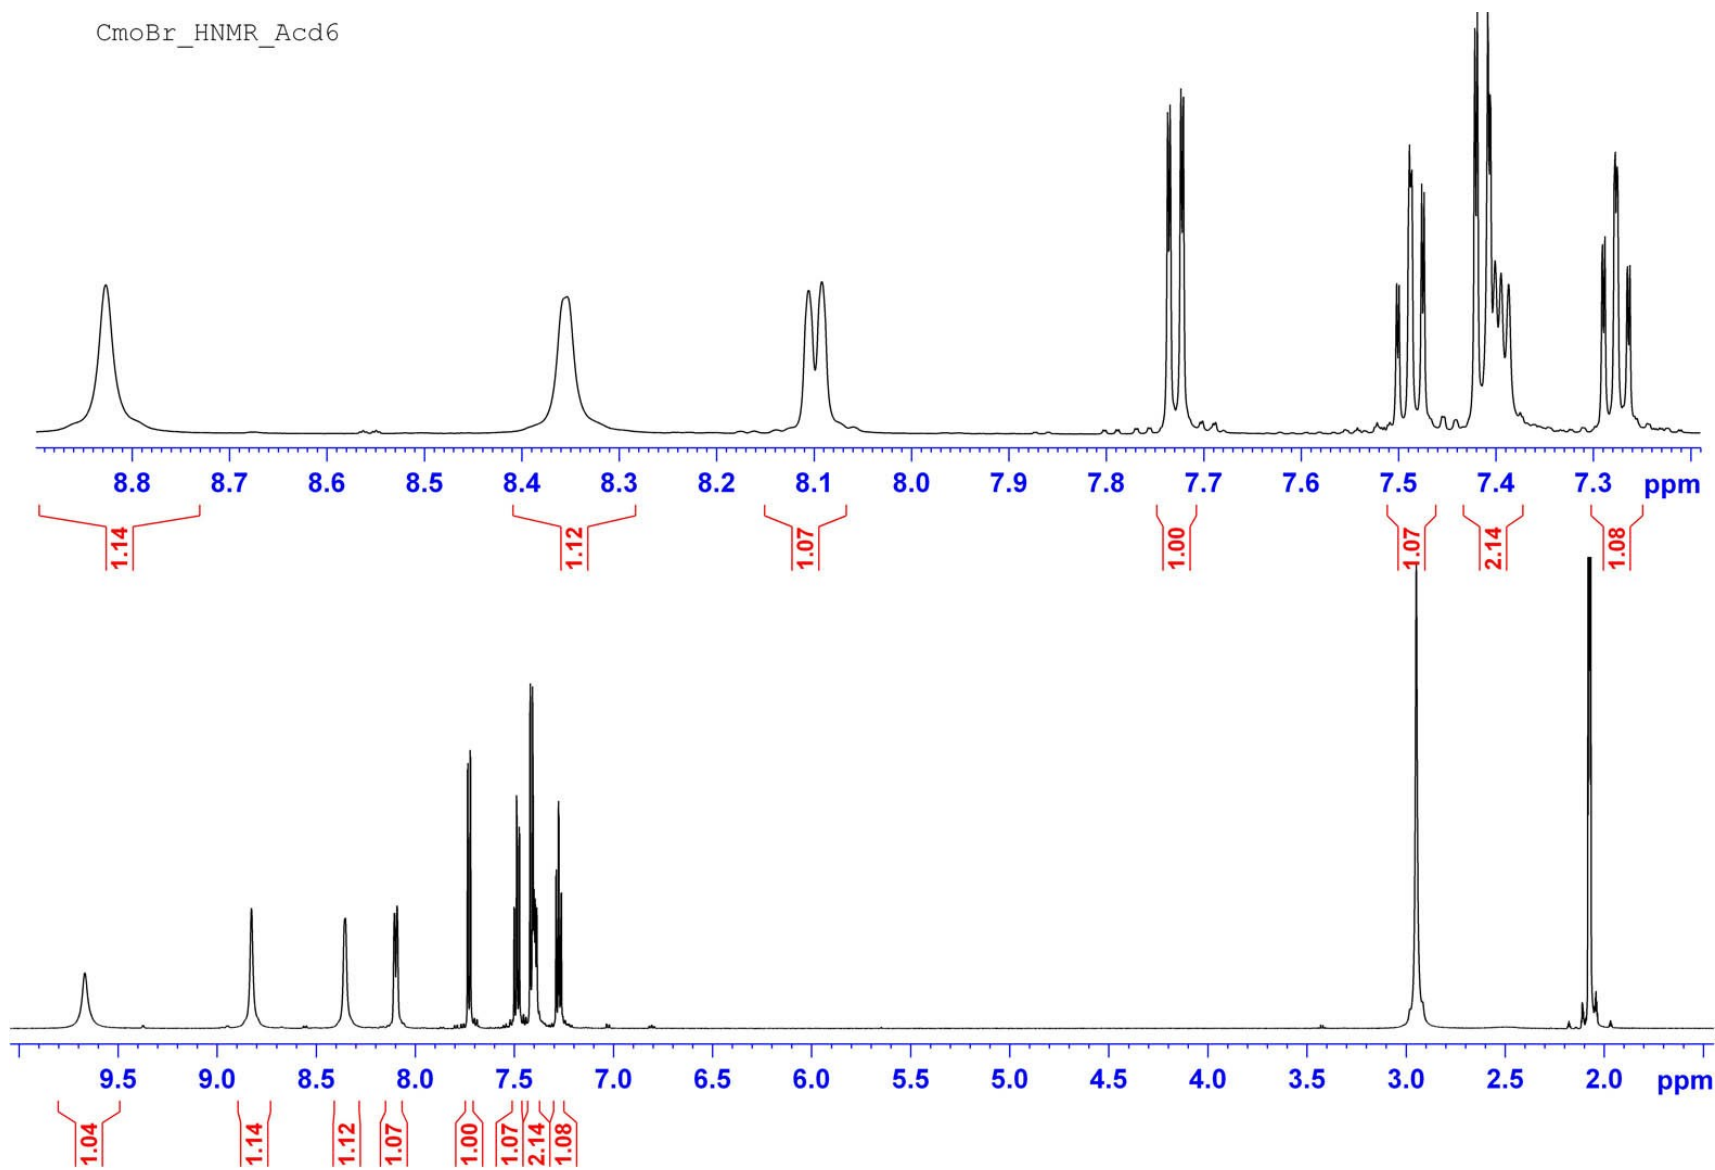

1.3.1.12. **CmoBr** (CDCl<sub>3</sub>)  $\delta$  7.18 (1H, td,  $^3J=7.7$ ,  $^4J=1.6$ ), 7.30 (1H, dd,  $^3J=8.0$ ,  $^4J=1.5$ ), 7.35 (1H, dd,  $^3J=8.2$ ,  $^4J=4.8$ ), 7.39 (1H, ddd,  $^3J=8.5$ ,  $^4J=7.7$ ,  $^5J=1.5$ ), 7.65 (1H, dd,  $^3J=8.0$ ,  $^4J=1.4$ ), 8.16 (1H, d,  $^3J=8.0$ ), 8.18 (1H, br s), 8.42 (1H, d,  $^3J=4.3$ ), 8.67 (1H, d,  $^3J=2.2$ );

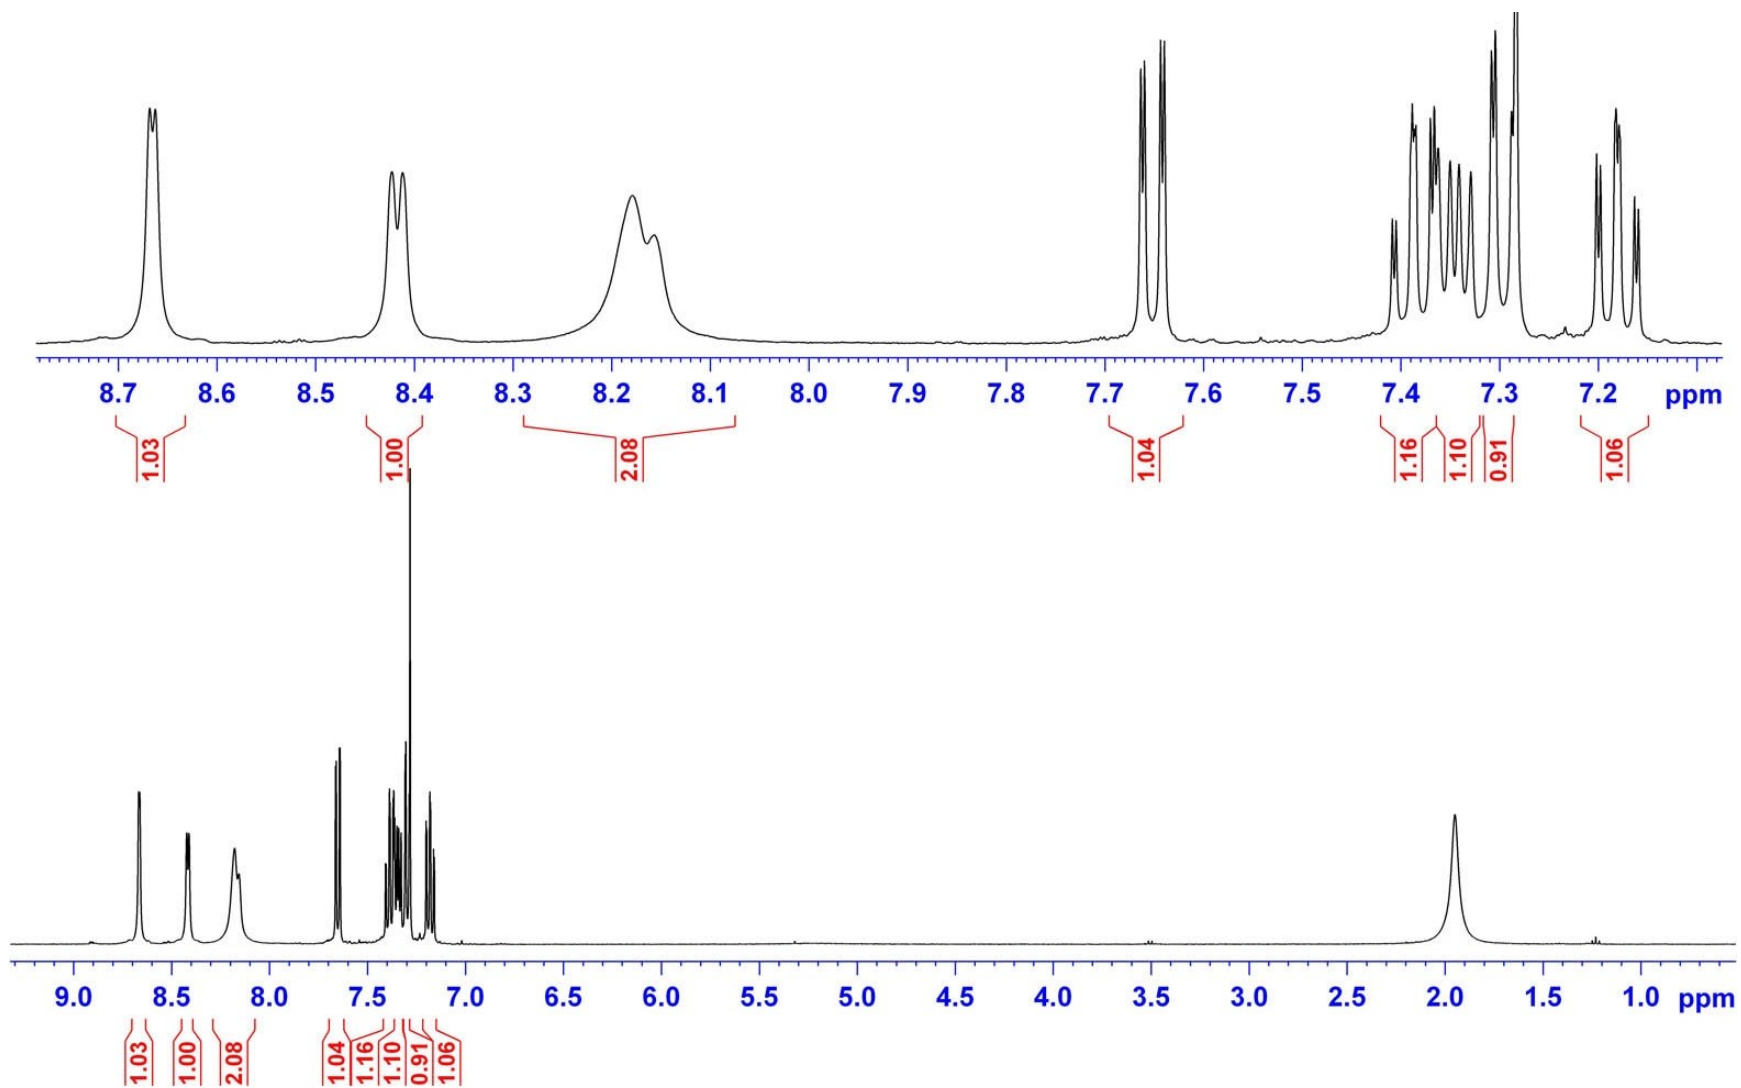

**CopBr** (Acetone- $d_6$ ):  $\delta$  7.12 (1H, ddd,  $^3J=7.6$ ,  $^4J=4.9$ ,  $^5J=1.0$ ), 7.26 (2H, dt,  $^3J=8.9$ ,  $^4J=2.2$ ), 7.63 (2H, dt,  $^3J=9.0$ ,  $^4J=2.2$ ), 7.82 (1H, ddd,  $^3J=8.3$ ,  $^4J=7.0$ ,  $^5J=1.9$ ), 7.96 (1H, dt,  $^3J=8.4$ ,  $^4J=0.8$ ), 8.33 (1H, ddd,  $^3J=4.9$ ,  $^4J=1.9$ ,  $^5J=0.9$ ), 9.56 (1H, br s);

CopBr\_Acd6\_PM

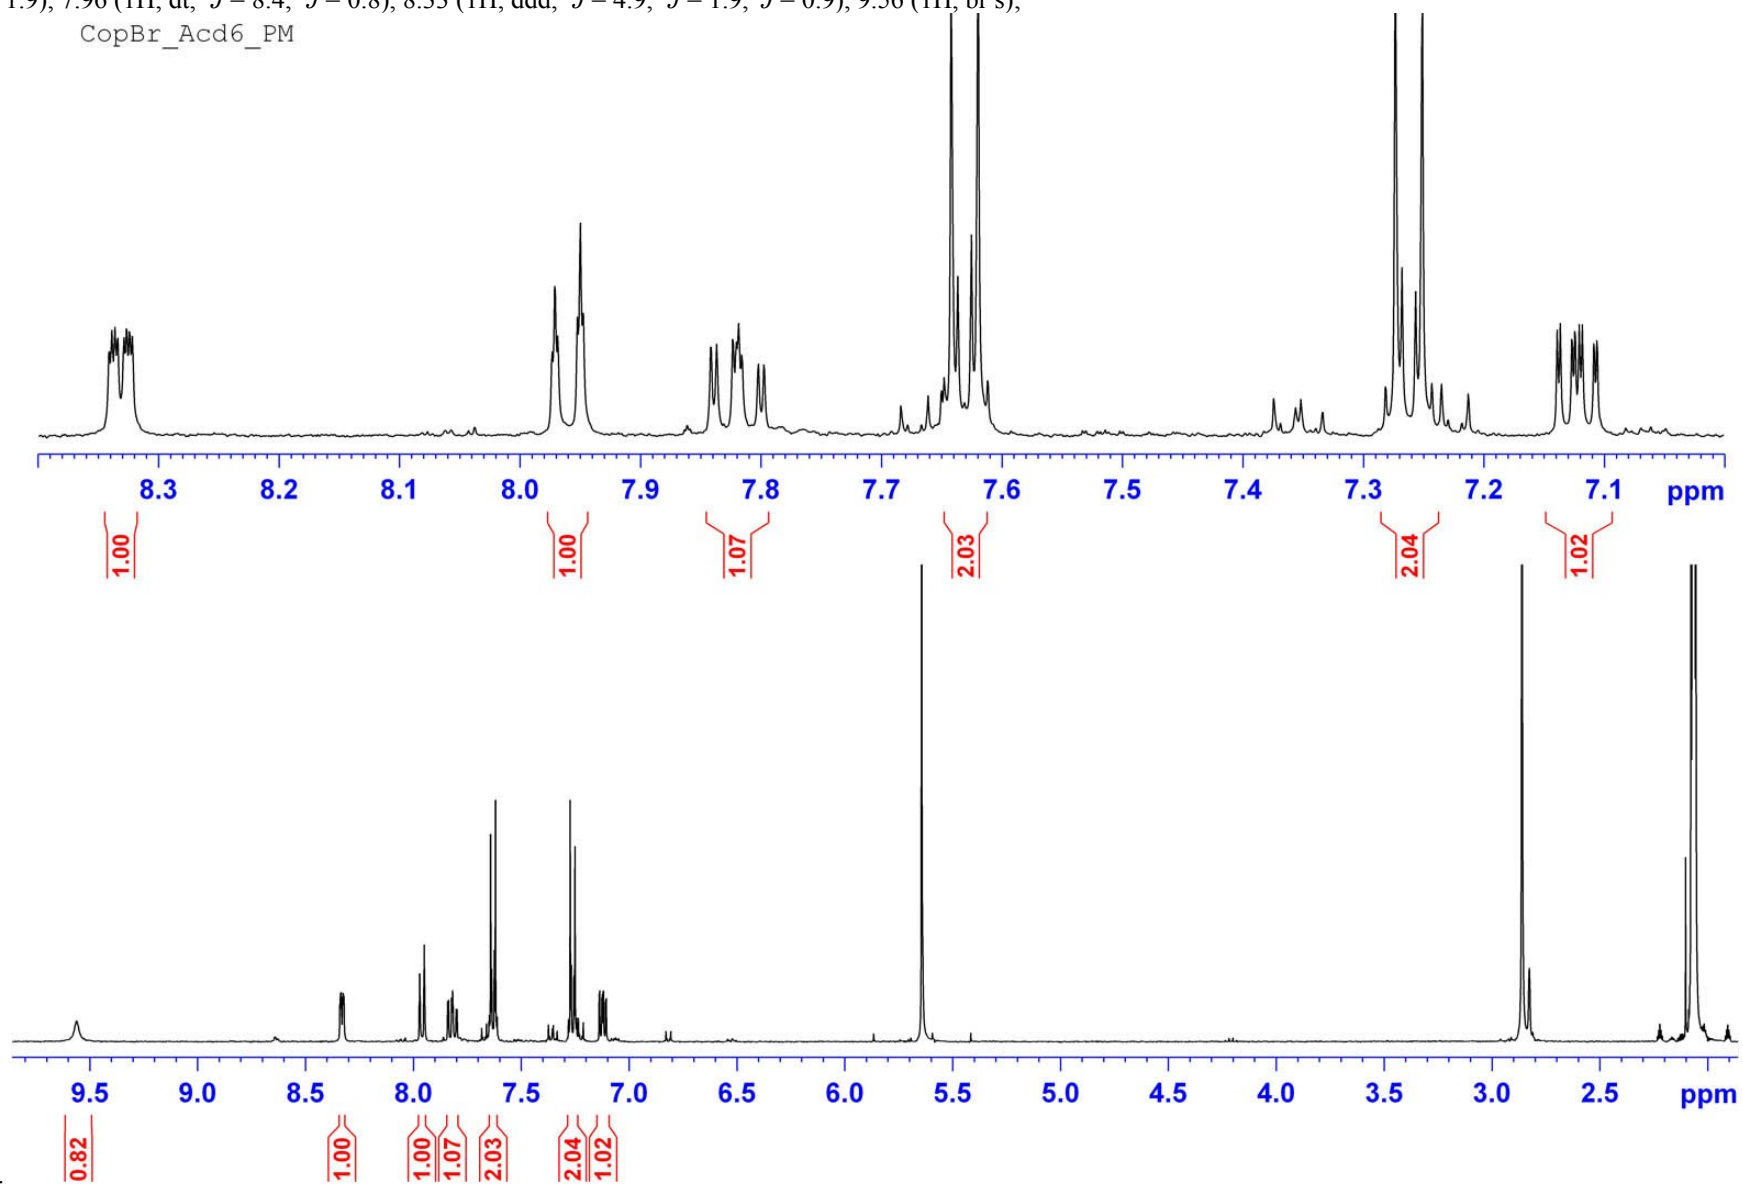

1.3.1.13.

1.3.1.14. **CopBr** (CDCl<sub>3</sub>) δ 6.87 (1H, ddd, <sup>3</sup>J = 7.6, <sup>4</sup>J = 5.1, <sup>5</sup>J = 0.7), 6.92 (2H, dt, <sup>3</sup>J = 8.9, <sup>4</sup>J = 2.5), 7.34 (2H, dt, <sup>3</sup>J = 8.8, <sup>4</sup>J = 2.5), 7.57 (1H, ddd, <sup>3</sup>J = 8.6, <sup>4</sup>J = 6.7, <sup>5</sup>J = 1.8), 7.85 (1H, d, <sup>3</sup>J = 8.5), 8.16 (1H, d, <sup>3</sup>J = 5), 9.36 (1H, br s);

CopBr\_CDCl3\_PM

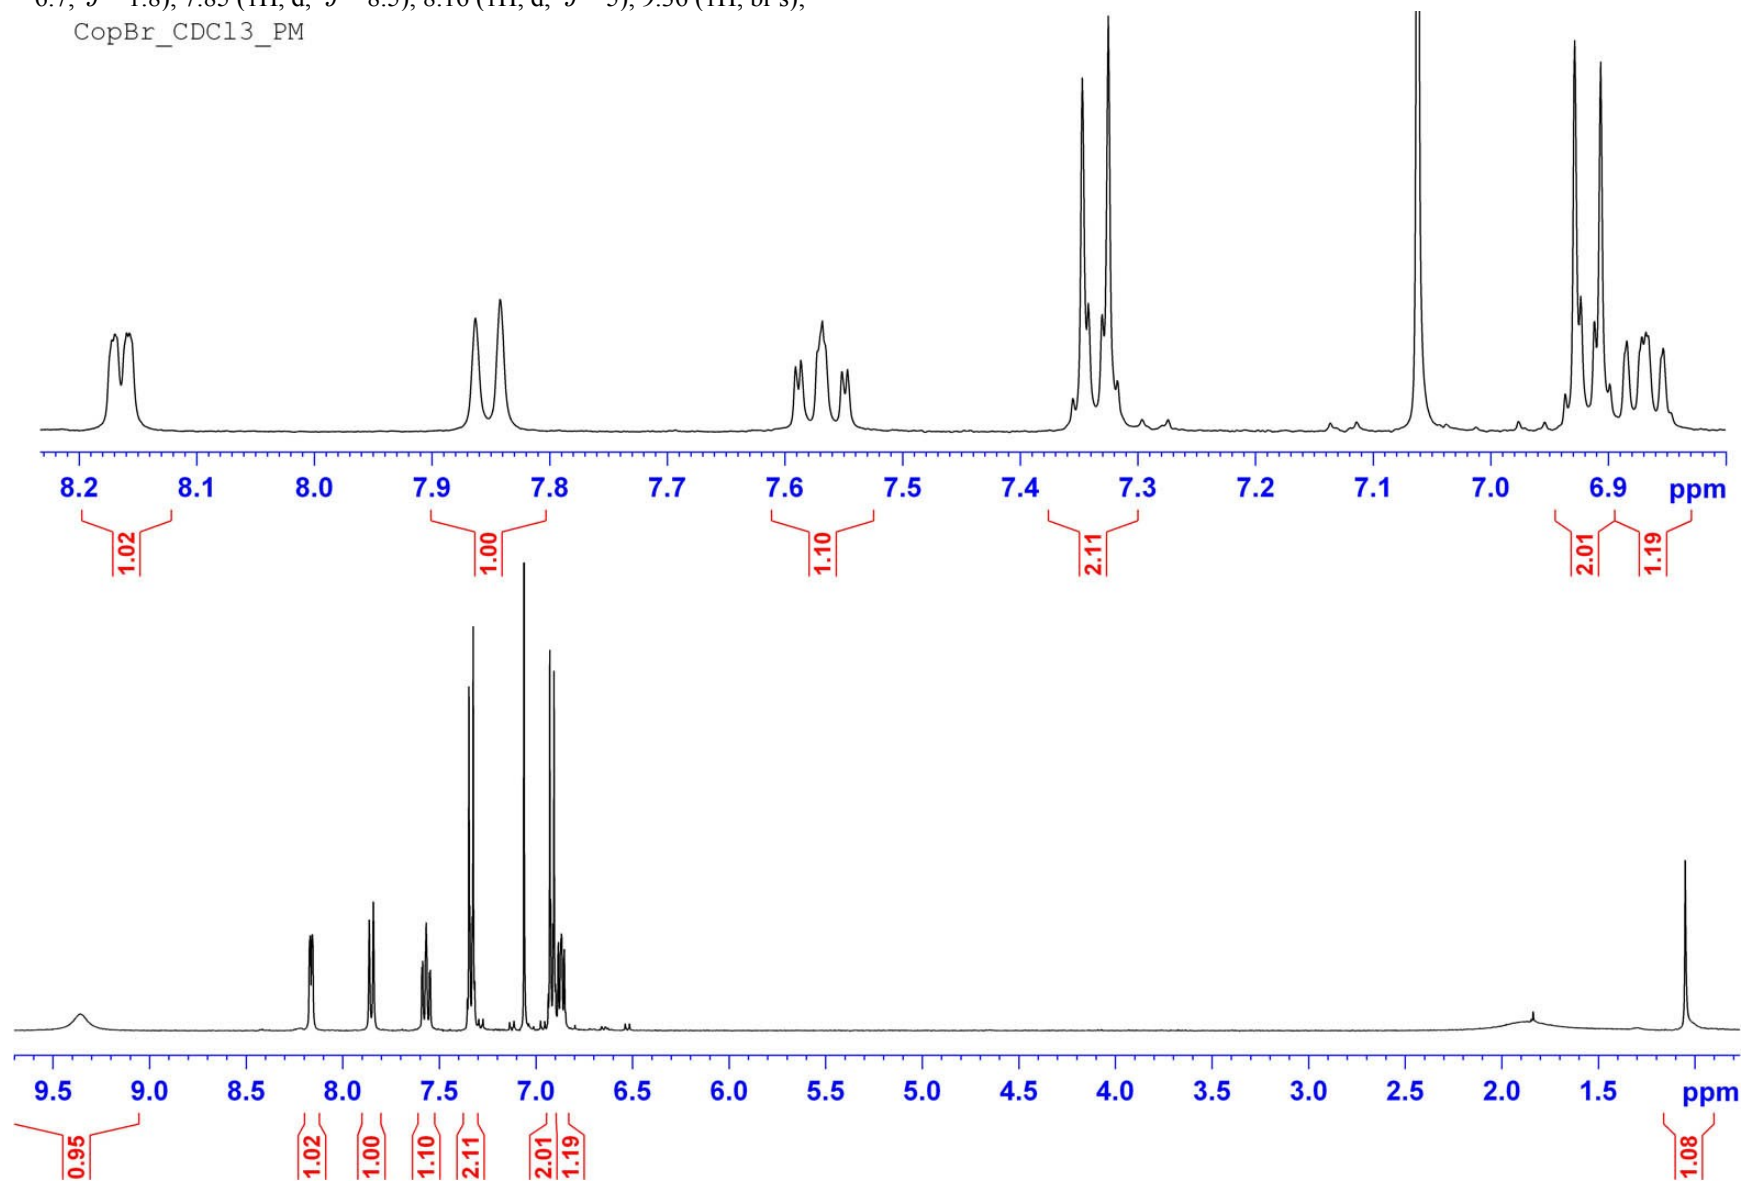

1.3.1.15. **ComBr** (Acetone- $d_6$ )  $\delta$  6.99 (1H, ddd,  $^3J=7.3$ ,  $^4J=5.0$ ,  $^5J=0.1$ ), 7.16 (1H, ddd,  $^3J=8.1$ ,  $^4J=2.0$ ,  $^5J=1.1$ ), 7.28 (1H, td,  $^3J=8.1$ ,  $^4J=0.9$ ), 7.35 (1H, d,  $^3J=8.6$ ), 7.40 (1H, m), 7.68 (1H, ddd,  $^3J=8.7$ ,  $^4J=7.5$ ,  $^5J=1.3$ ), 7.82 (1H, dd,  $^3J=8.3$ ,  $^5J=0.9$ ), 8.20 (1H, d,  $^3J=4.6$ ), 9.50 (1H, br s);

ComBr\_HNMR\_Acd6

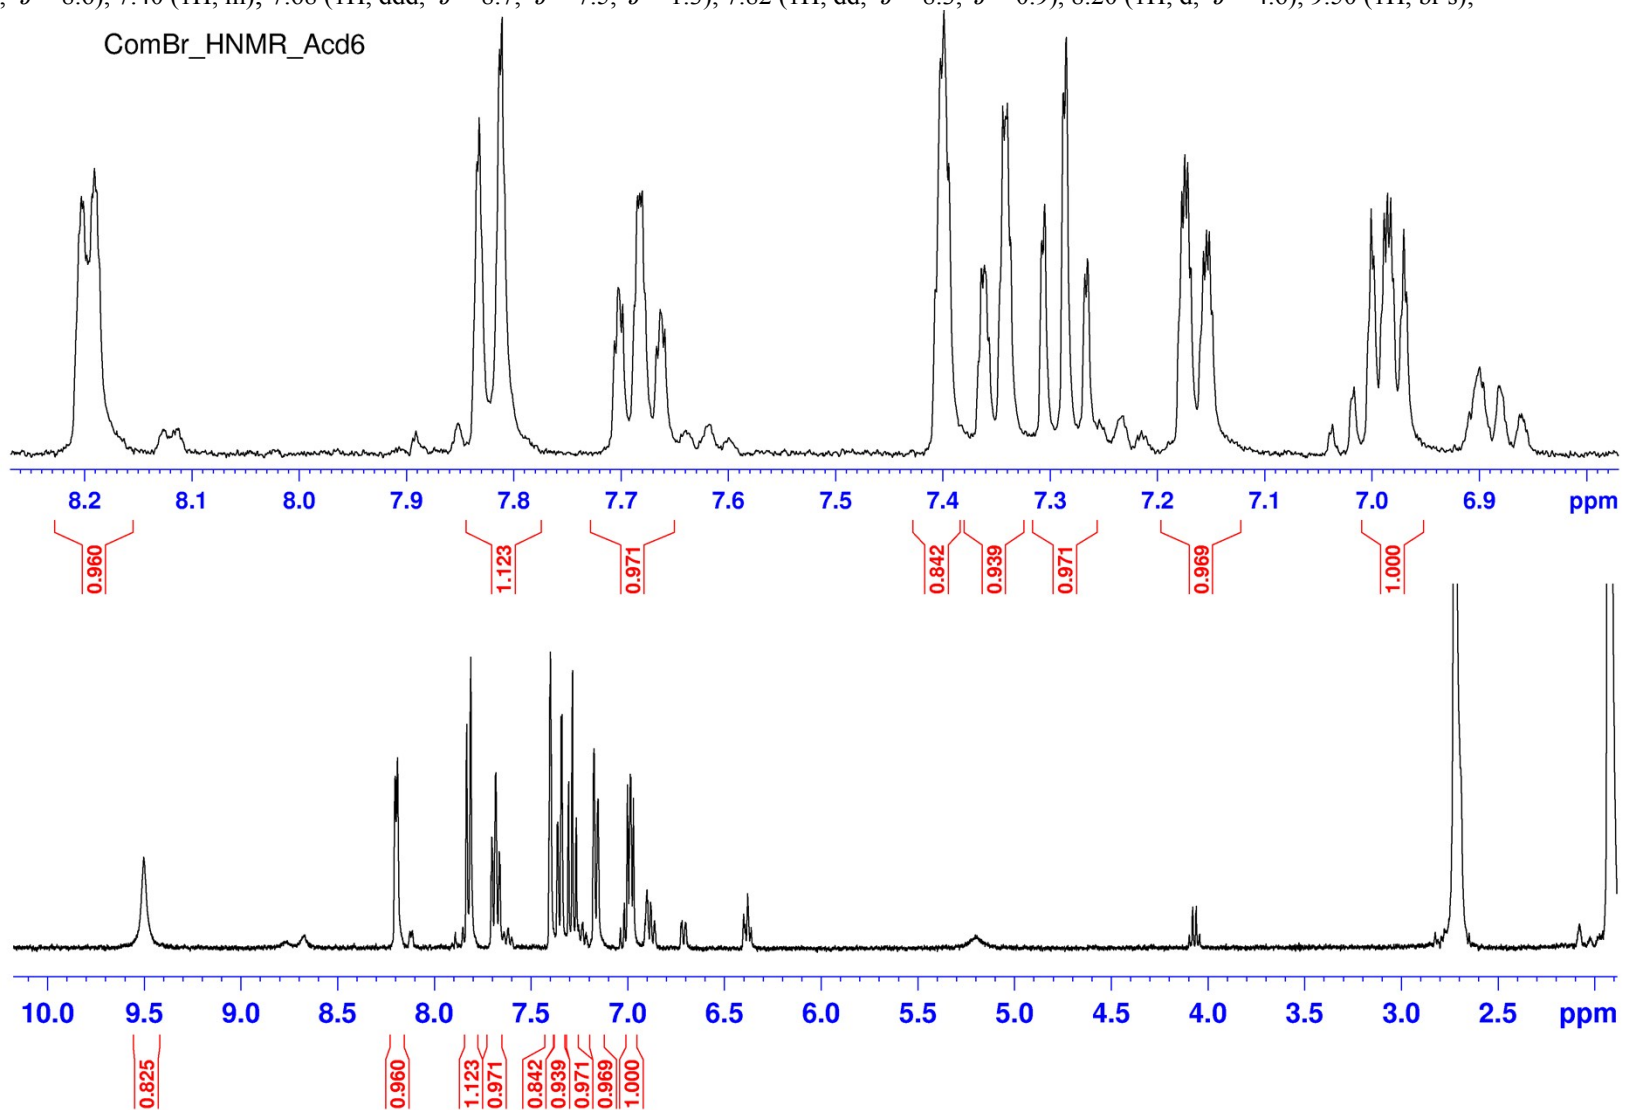

1.3.1.16. **ComBr** (CDCl<sub>3</sub>) δ 6.99 (1H, ddd, <sup>3</sup>J = 7.5, <sup>4</sup>J = 5.0, <sup>5</sup>J = 0.8), 7.12 (1H, ddd, <sup>3</sup>J = 8.2, <sup>4</sup>J = 2.2, <sup>5</sup>J = 1.0), 7.23 (1H, td, <sup>3</sup>J = 8.2, <sup>4</sup>J = 0.9), 7.37 (2H, m), 7.68 (1H, ddd, <sup>3</sup>J = 9.0, <sup>4</sup>J = 7.0, <sup>5</sup>J = 1.8), 7.98 (1H, d, <sup>3</sup>J = 8.4), 8.33 (1H, dd, <sup>3</sup>J = 5.2, <sup>4</sup>J = 1.5), 9.97 (1H, br s);

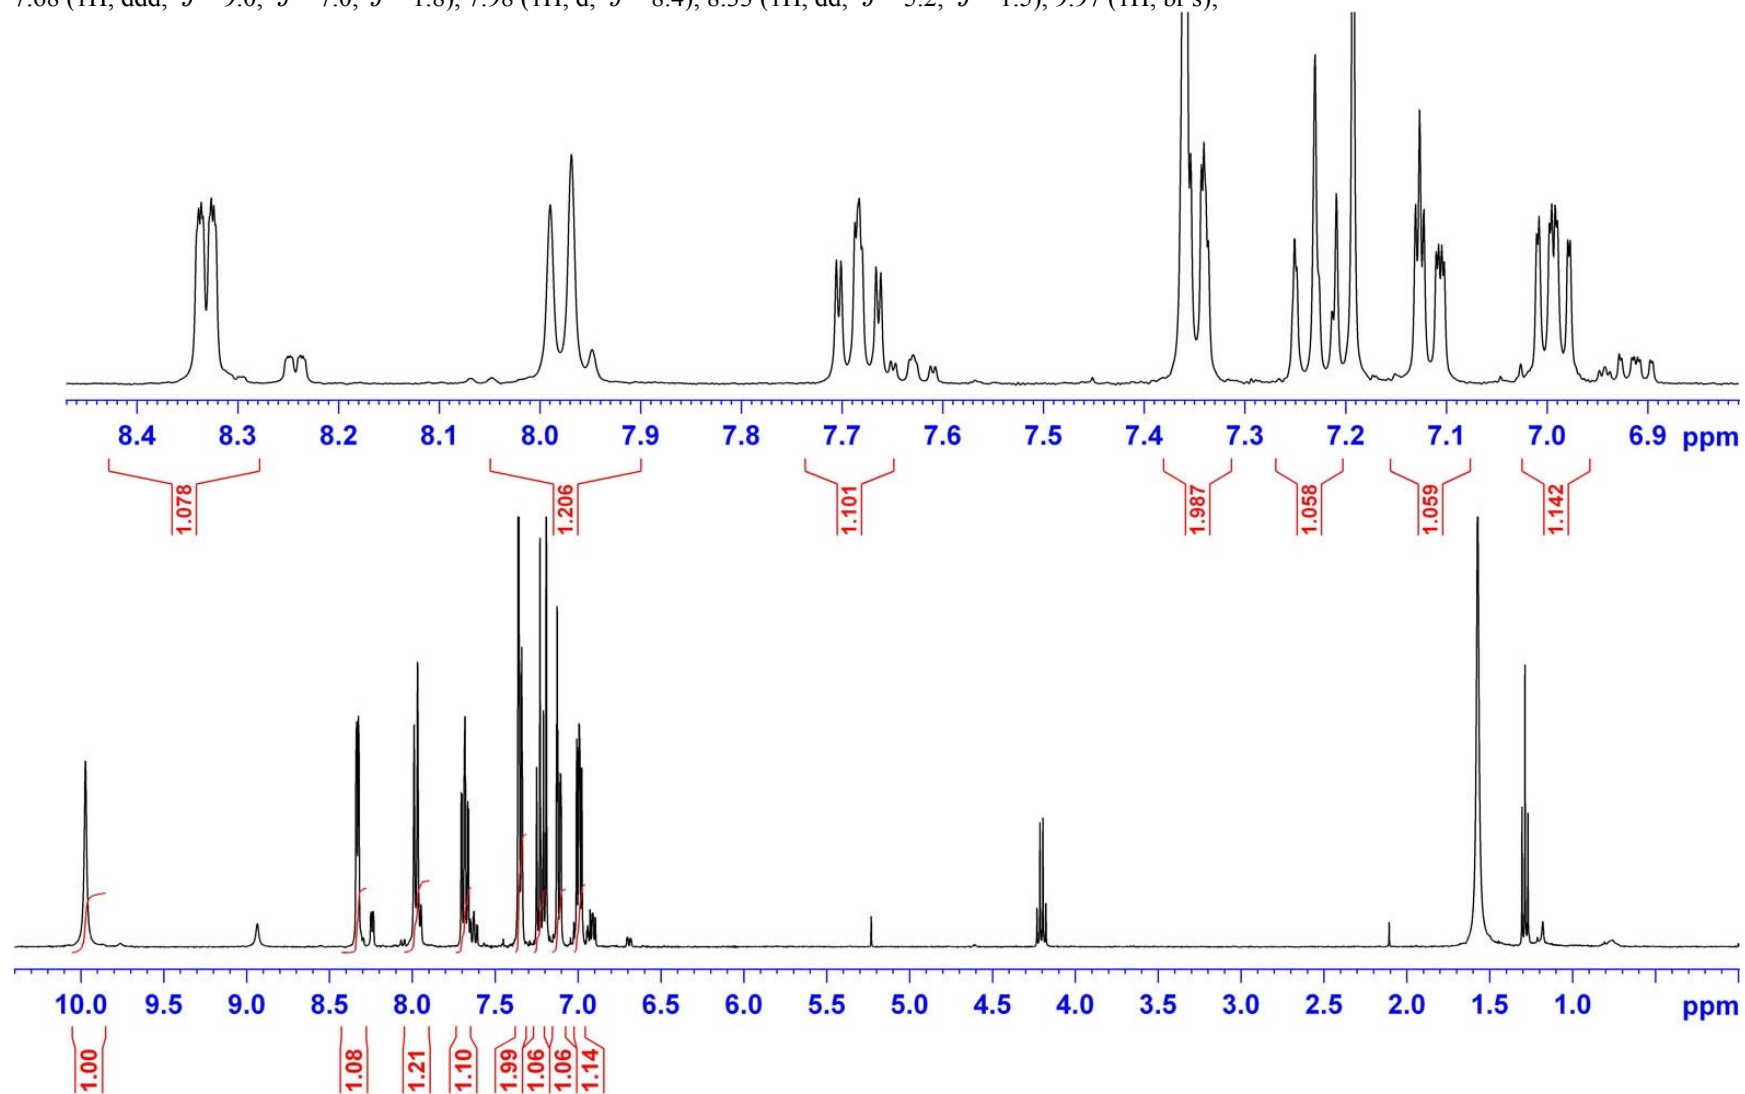

### 1.3.2. <sup>13</sup>C NMR data and spectra (400 MHz, Acetone-d<sub>6</sub>)

1.3.2.1. CppBr: δ 113.50, 119.08, 124.90, 133.26, 146.50, 150.88, 151.49, 151.96;

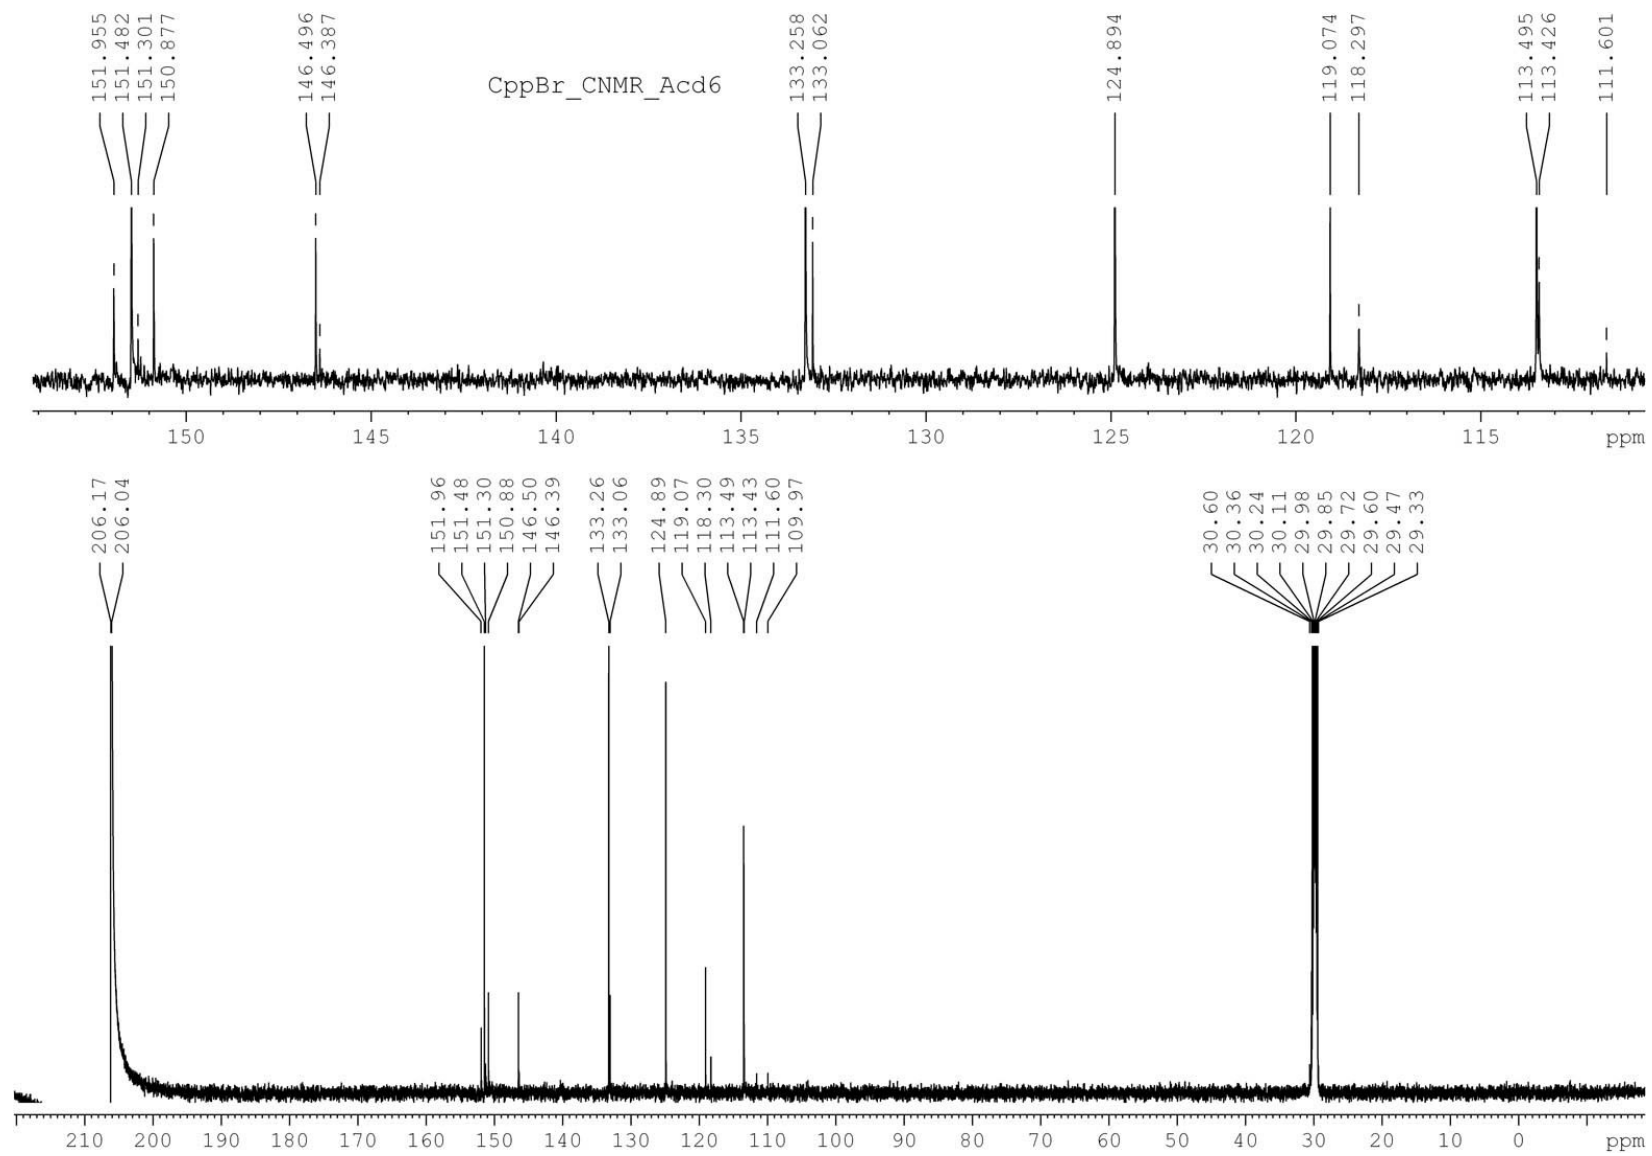



1.3.2.2. **CpmBr**:  $\delta$  113.53, 121.89, 122.50, 126.10, 129.69, 131.82, 146.45, 151.49, 151.89, 152.32;

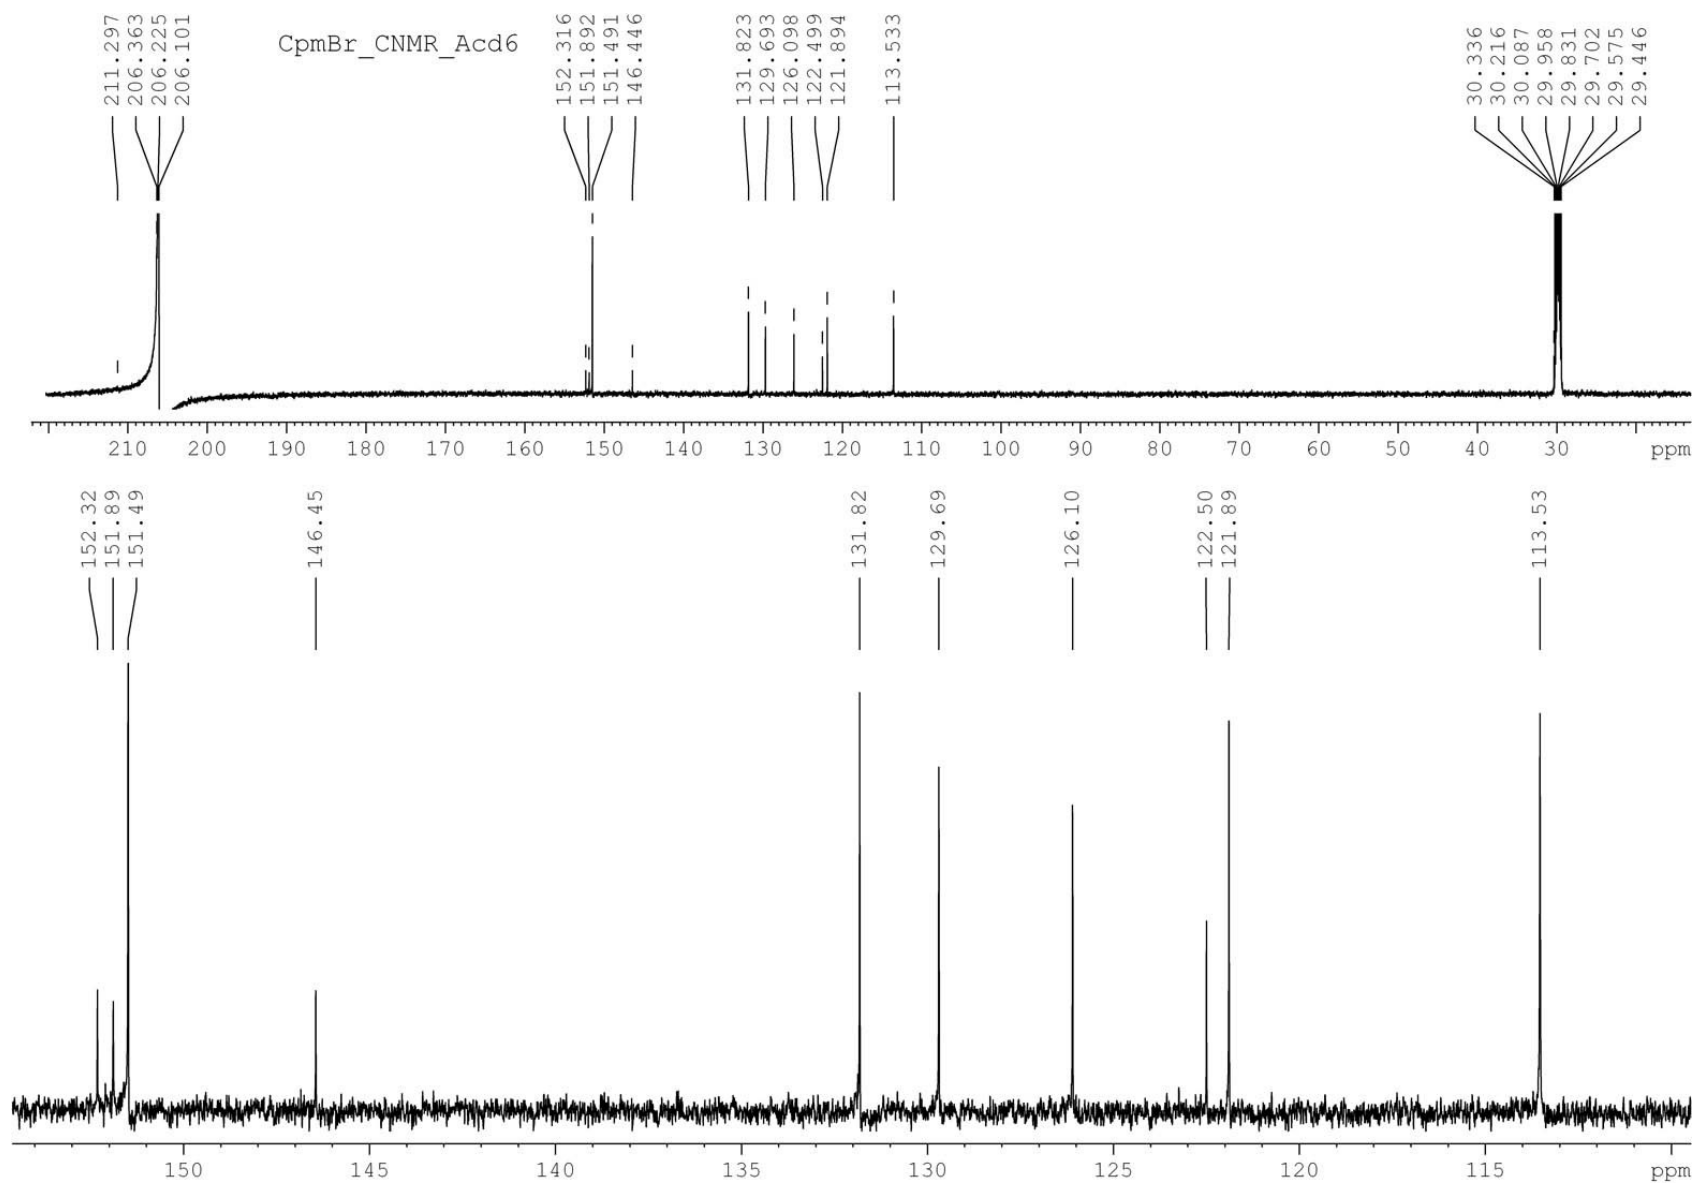

1.3.2.3. CpoBr:  $\delta$  117.16, 125.44, 128.62, 129.74, 134.11, 146.74, 148.83, 151.32, 151.52

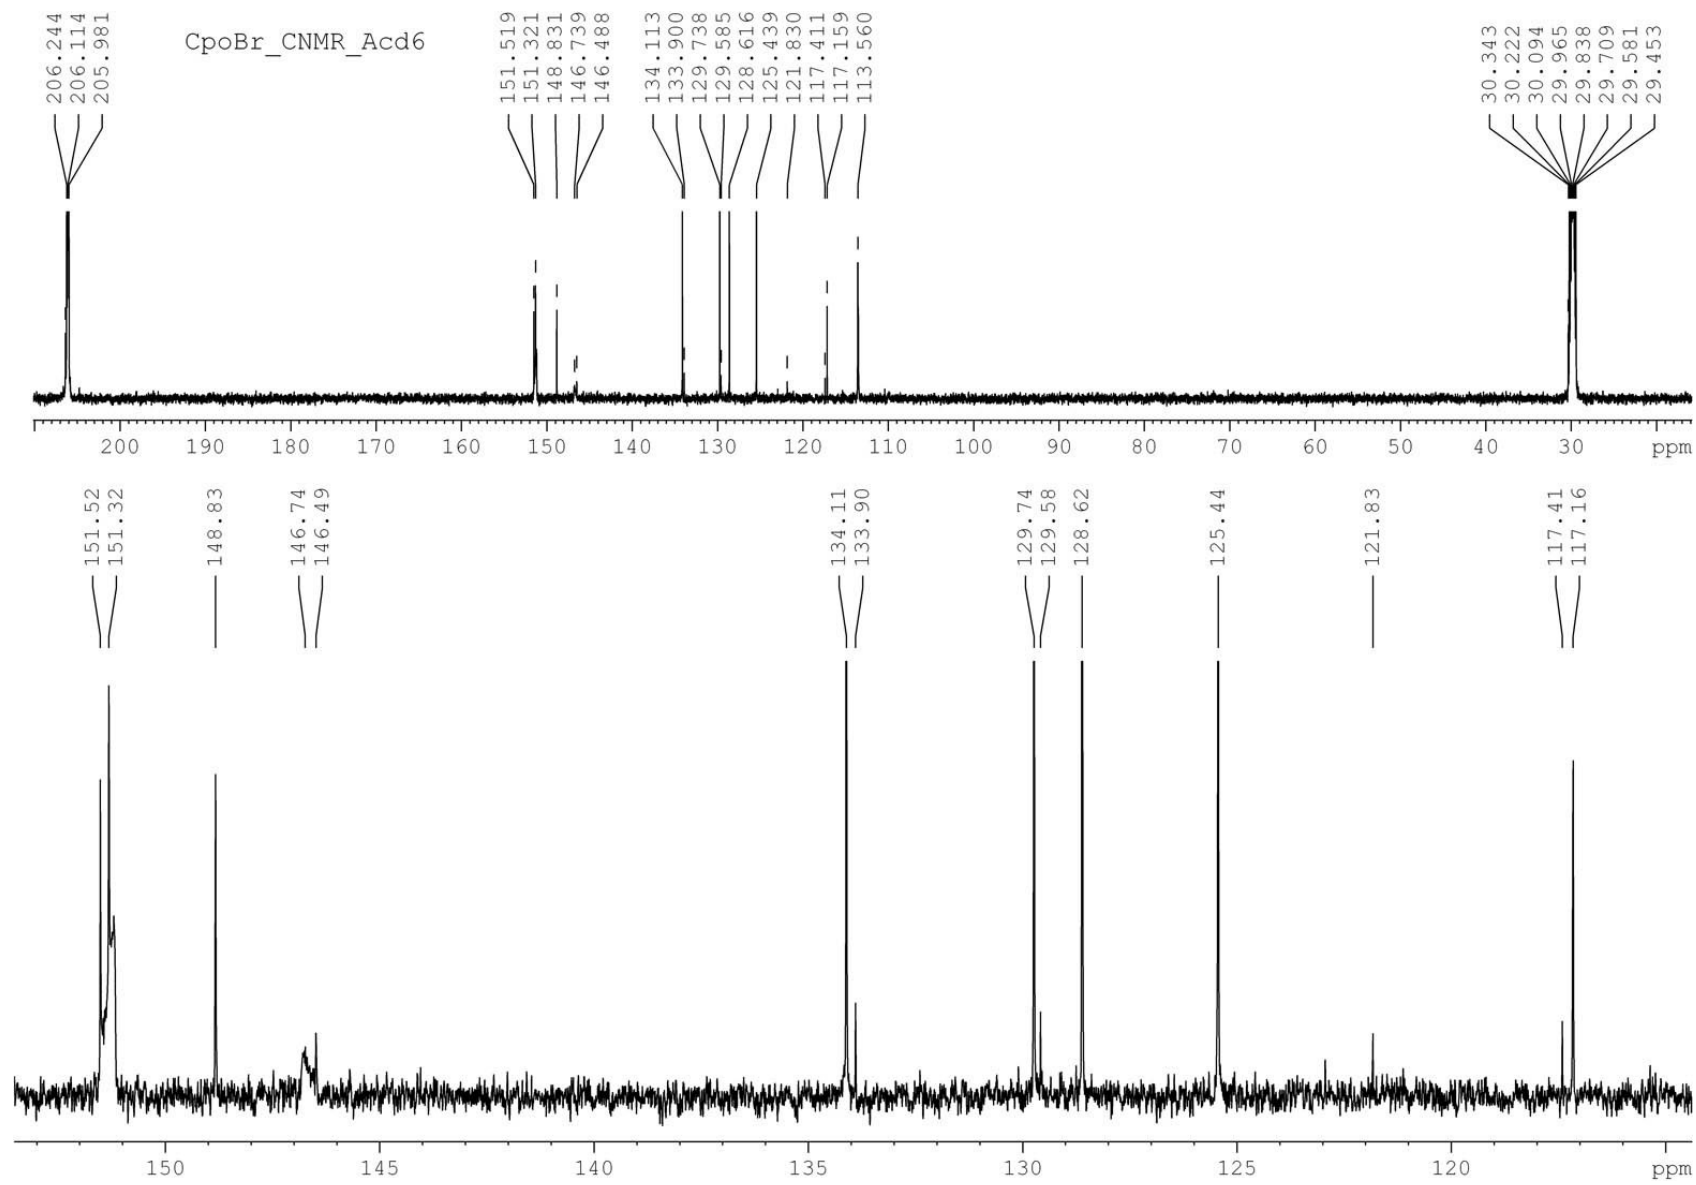

1.3.2.4. **CmpBr**  $\delta$  118.88, 124.41, 124.88, 126.18, 133.20, 136.29, 141.52, 145.38, 151.09, 152.39;

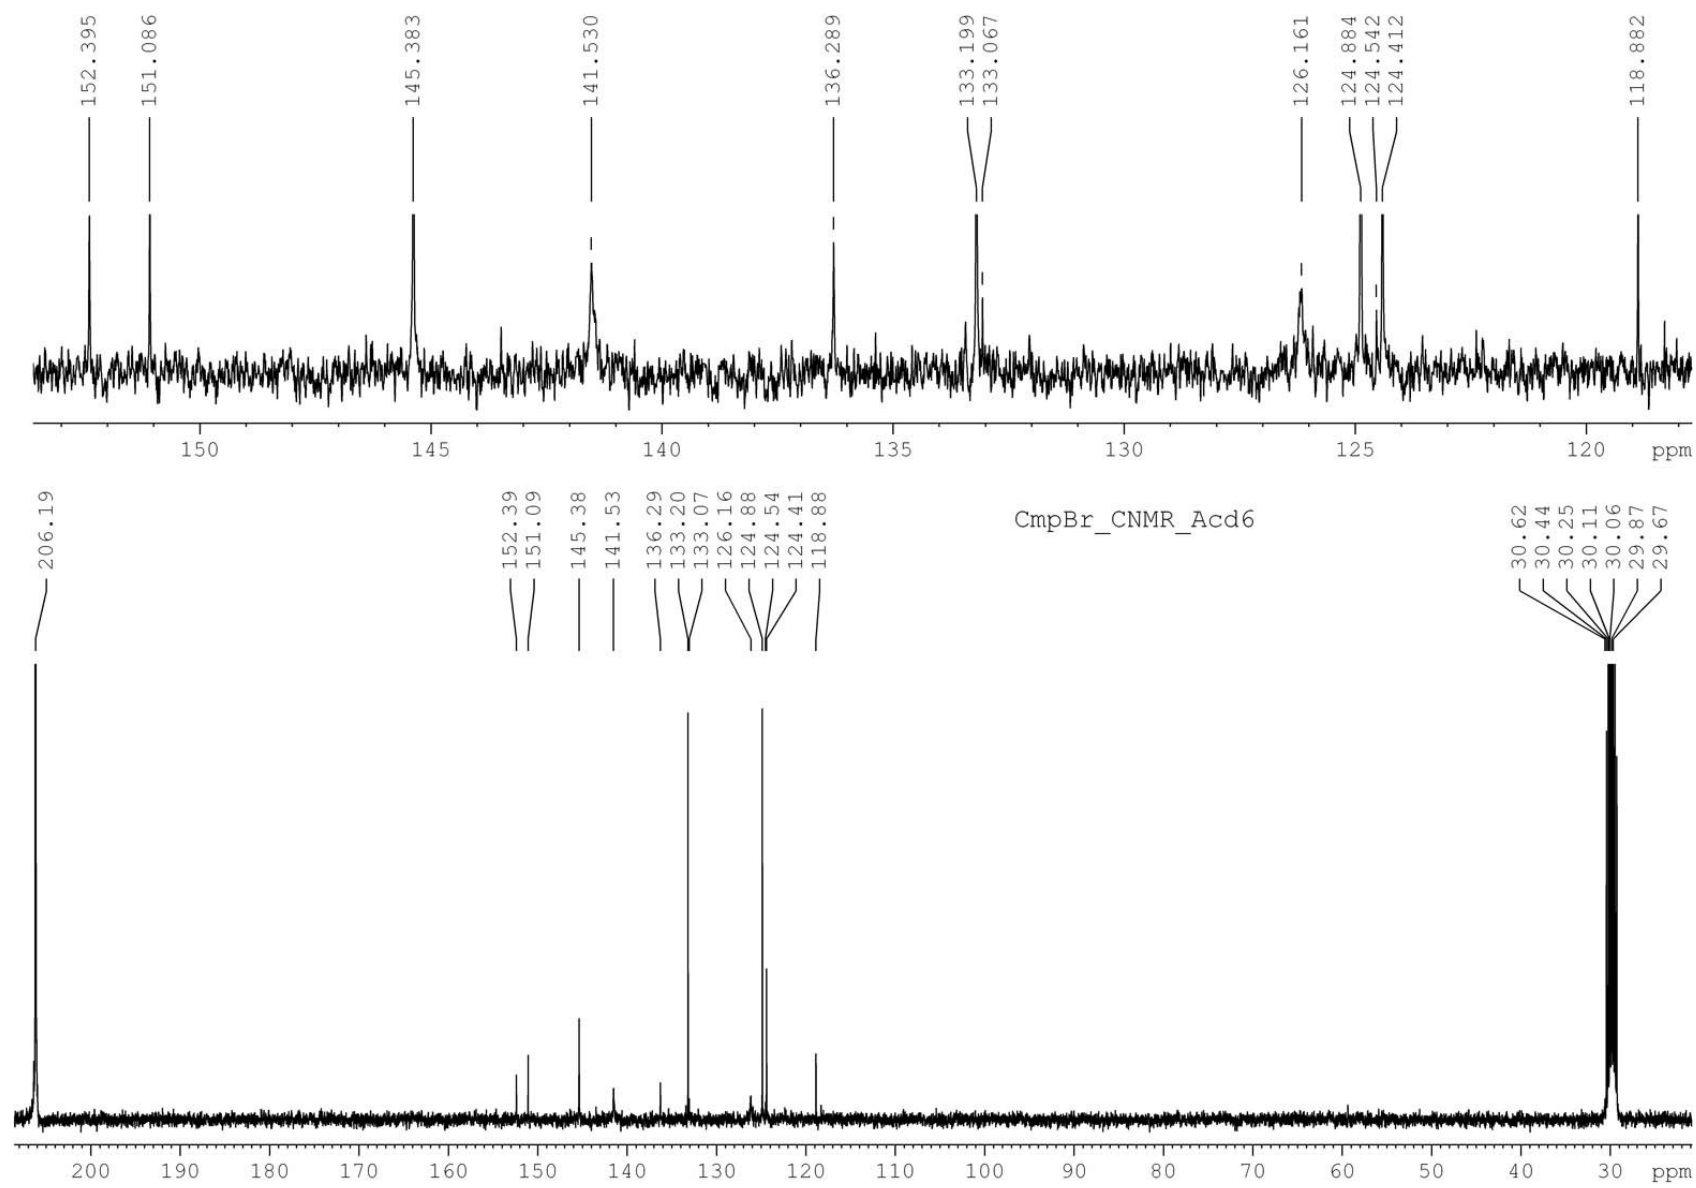

1.3.2.5. **CmmBr**:  $\delta$  121.87, 122.47, 124.41, 126.08, 126.25, 129.51, 131.77, 136.26, 141.58, 145.43, 152.34, 152.55;

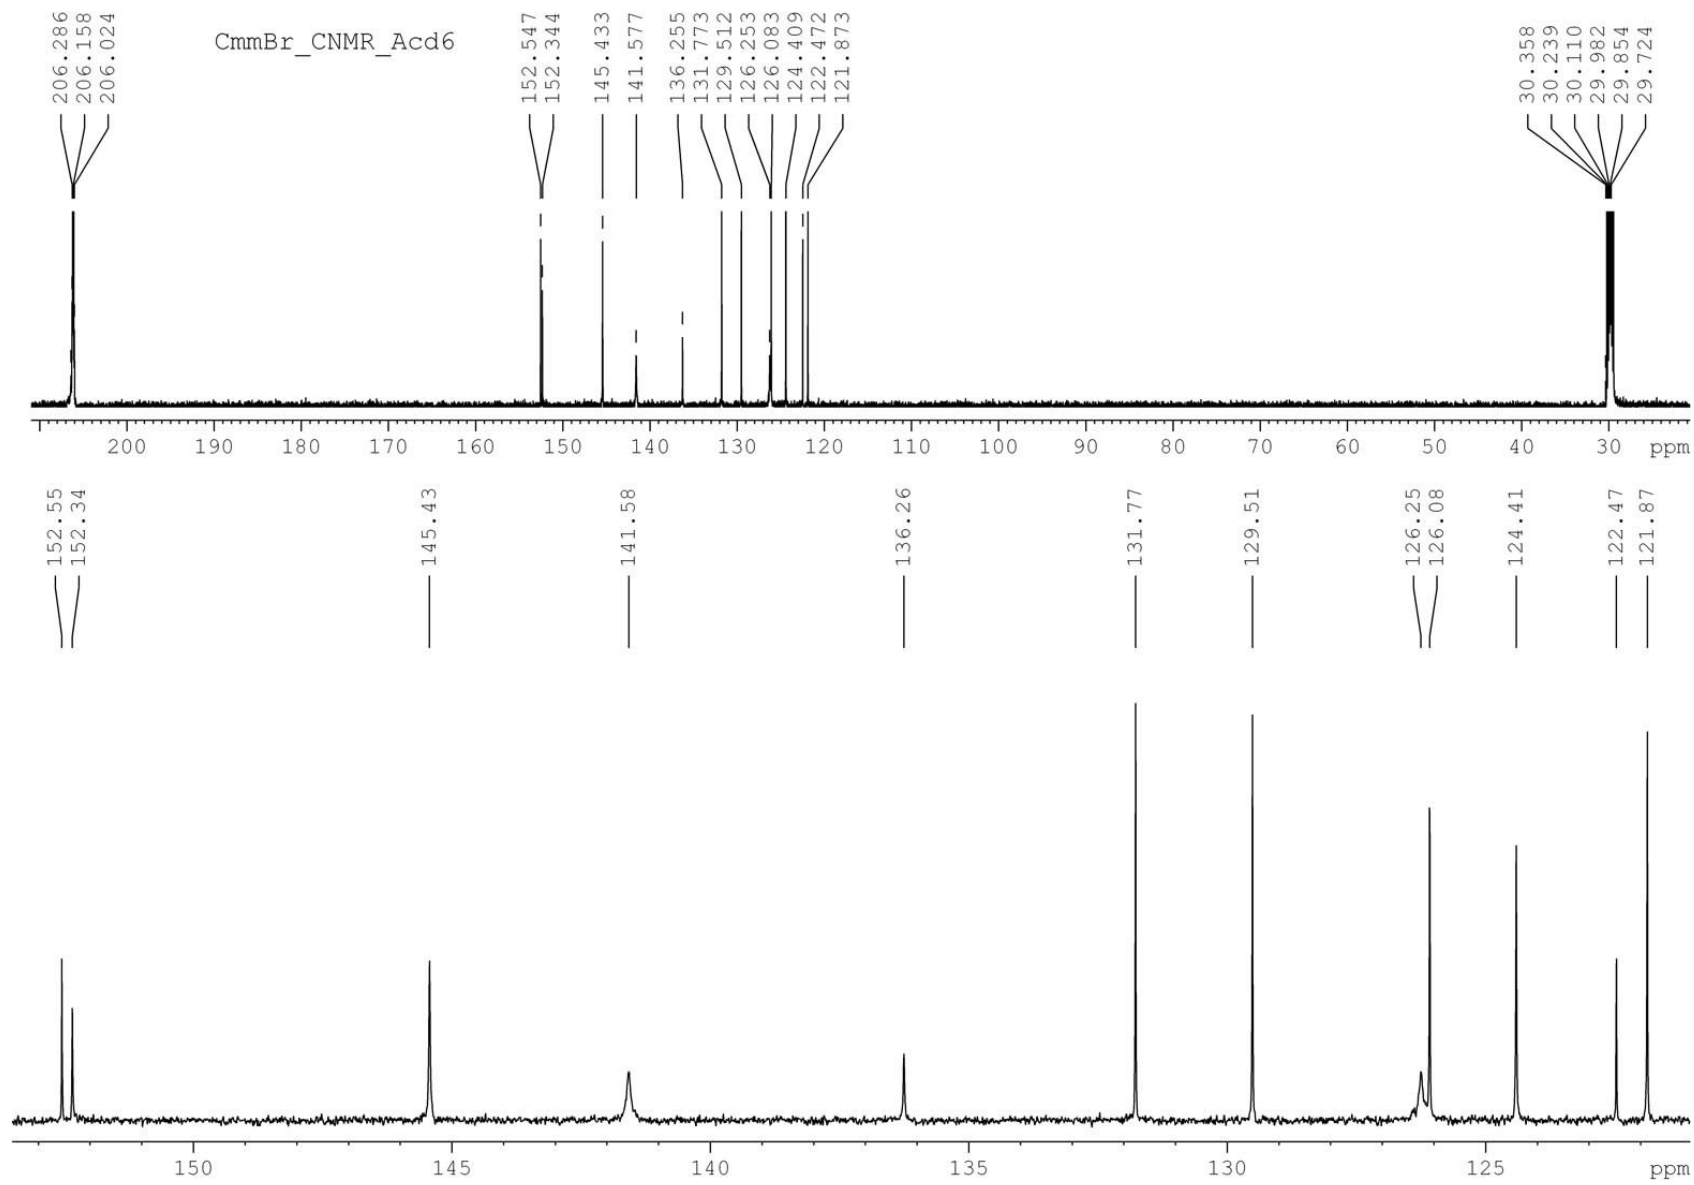

1.3.2.6. **CmoBr**:  $\delta$  117.21, 124.82, 125.47, 126.84, 128.47, 129.68, 134.08, 136.63, 140.71, 144.73, 149.02, 151.78;

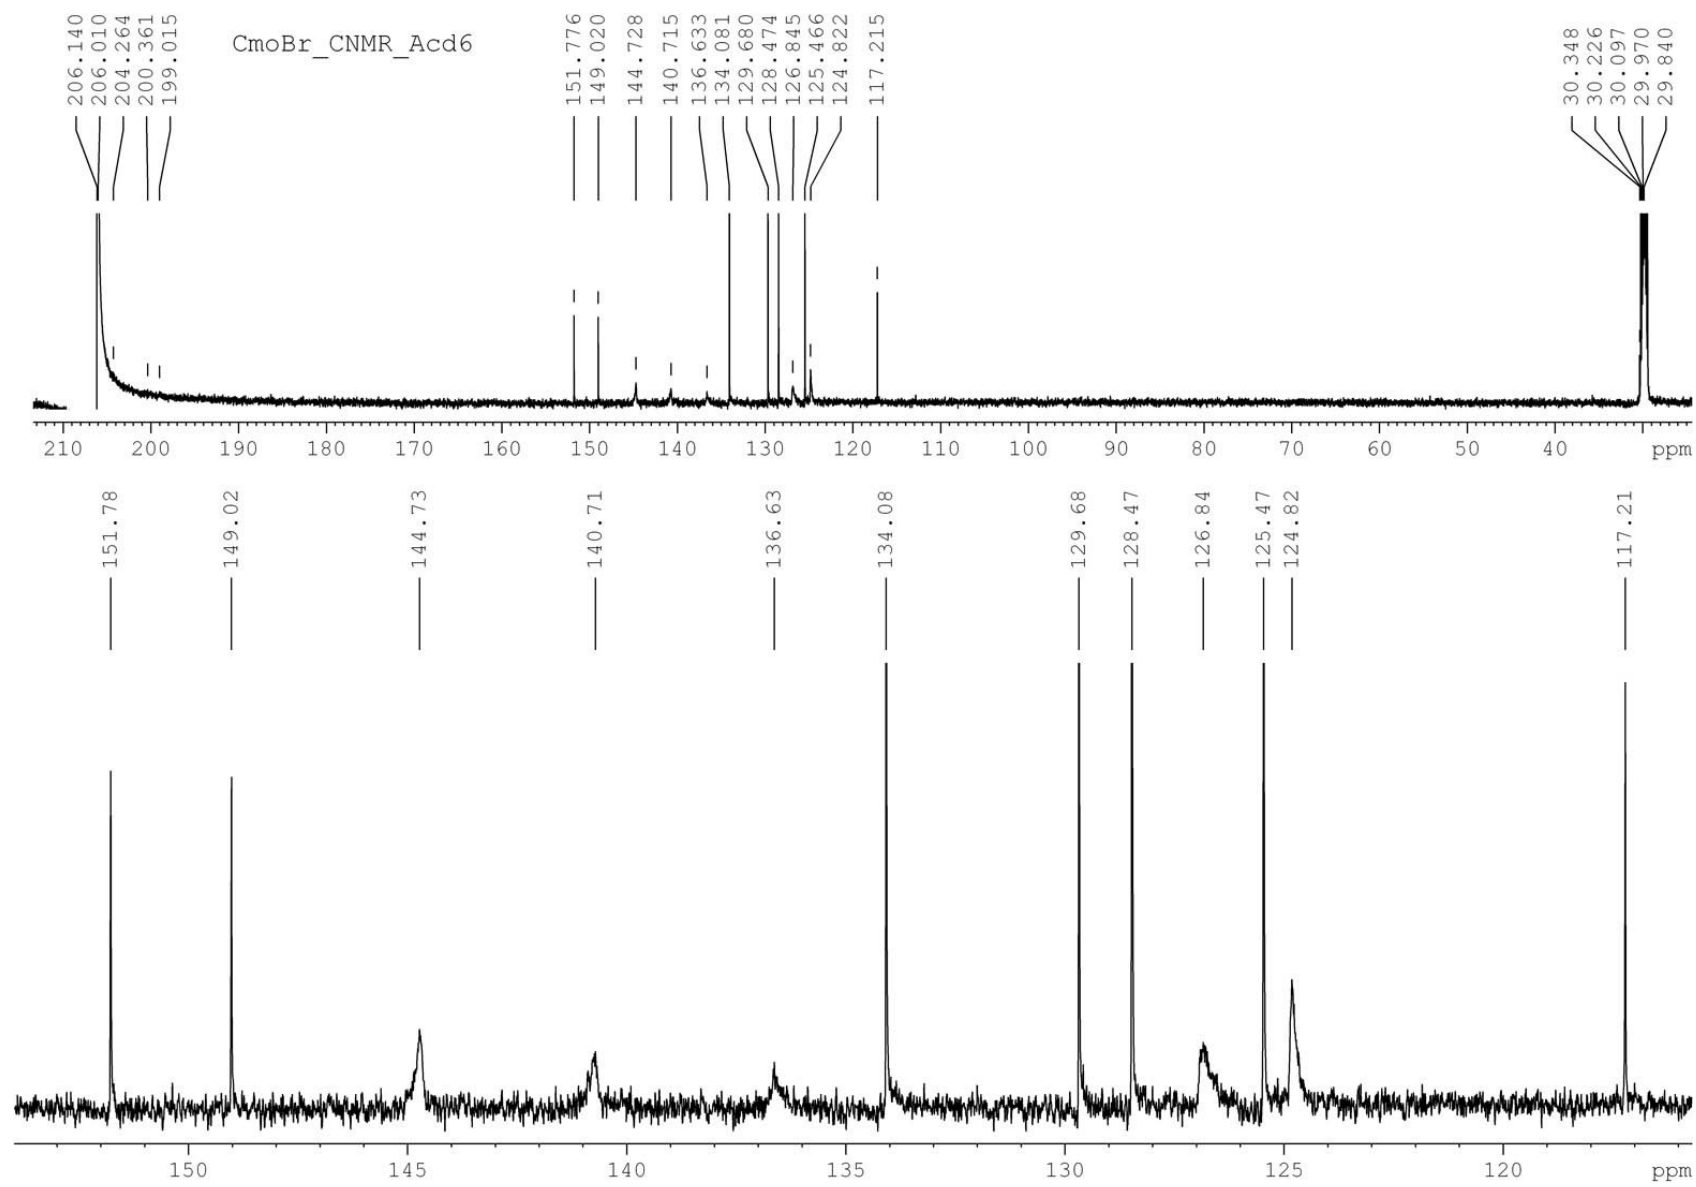

1.3.2.7. **CopBr**:  $\delta$  108.82, 111.63, 113.33, 113.51, 118.30, 124.46, 133.06, 137.77, 148.87, 157.70;

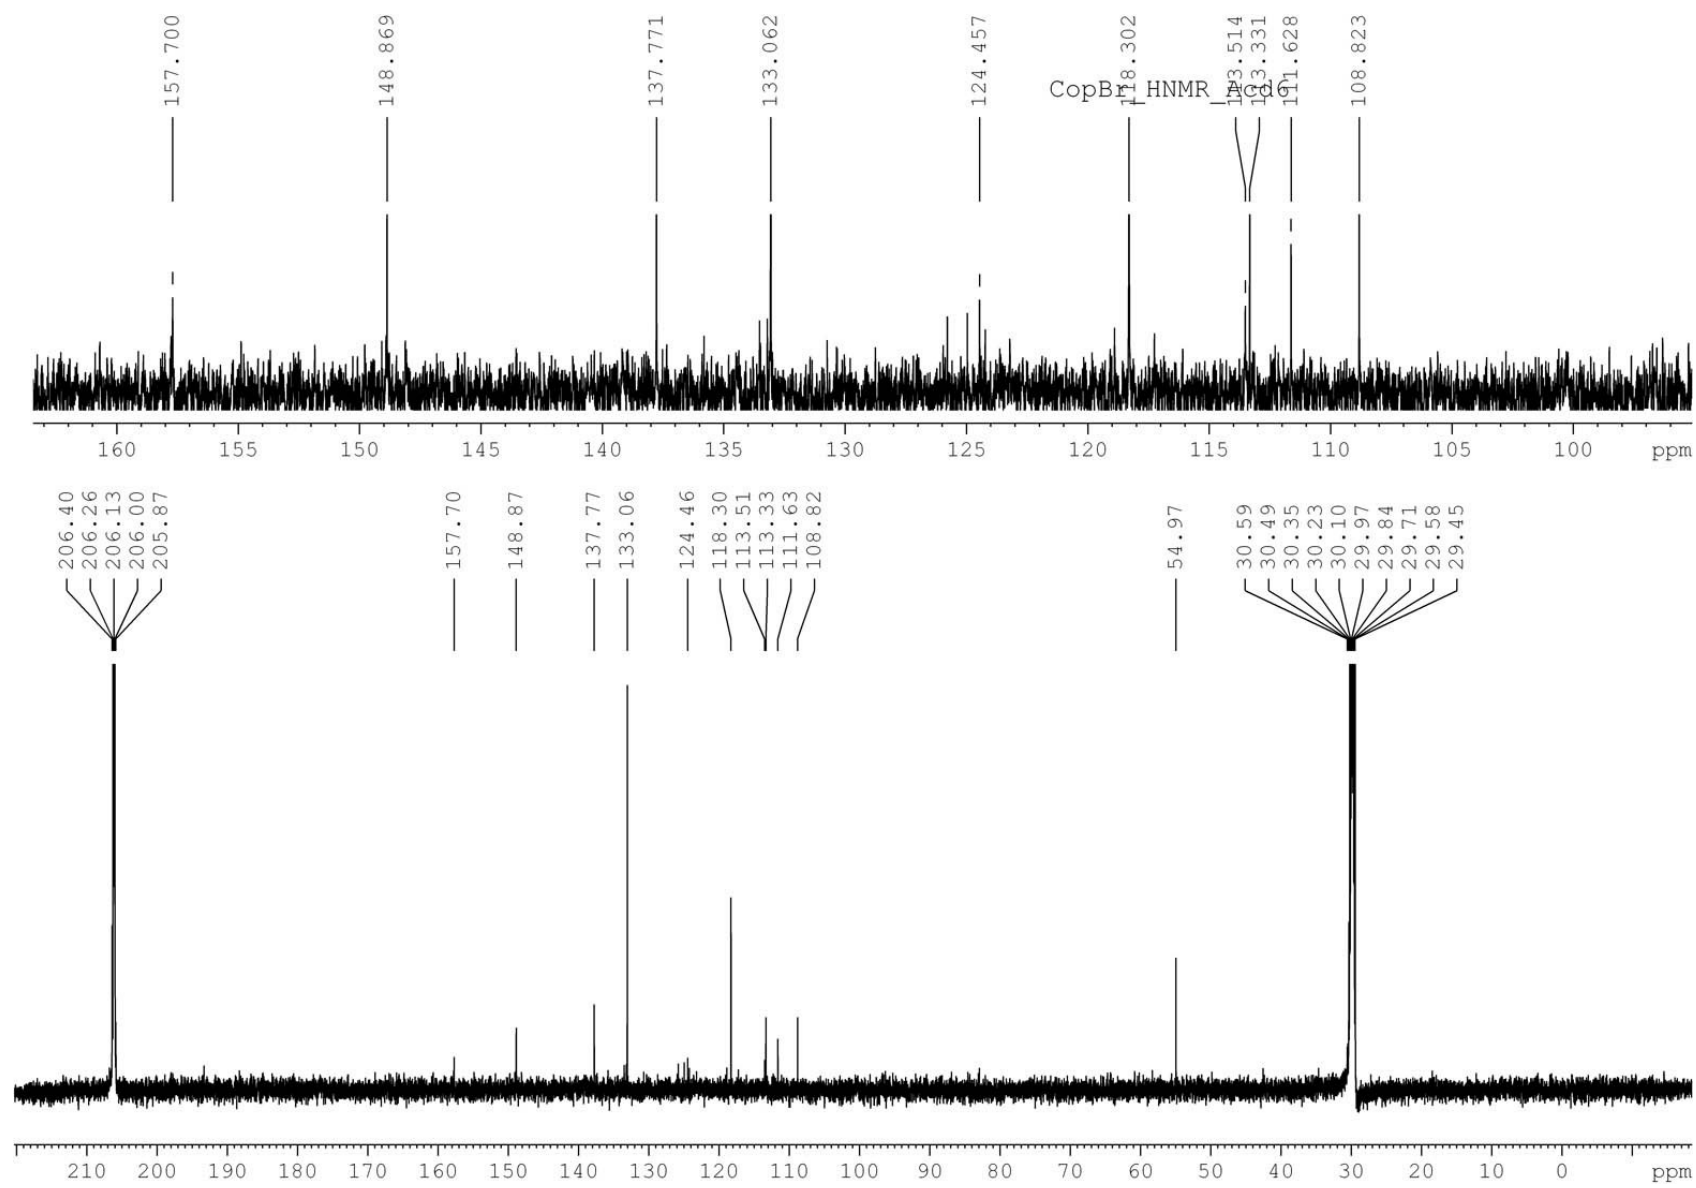

1.3.2.8. **ComBr** (CDCl<sub>3</sub>): δ 112.87, 119.44, 120.68, 122.46, 125.33, 129.16, 130.58, 138.88, 147.75, 150.87, 151.33, 151.58;

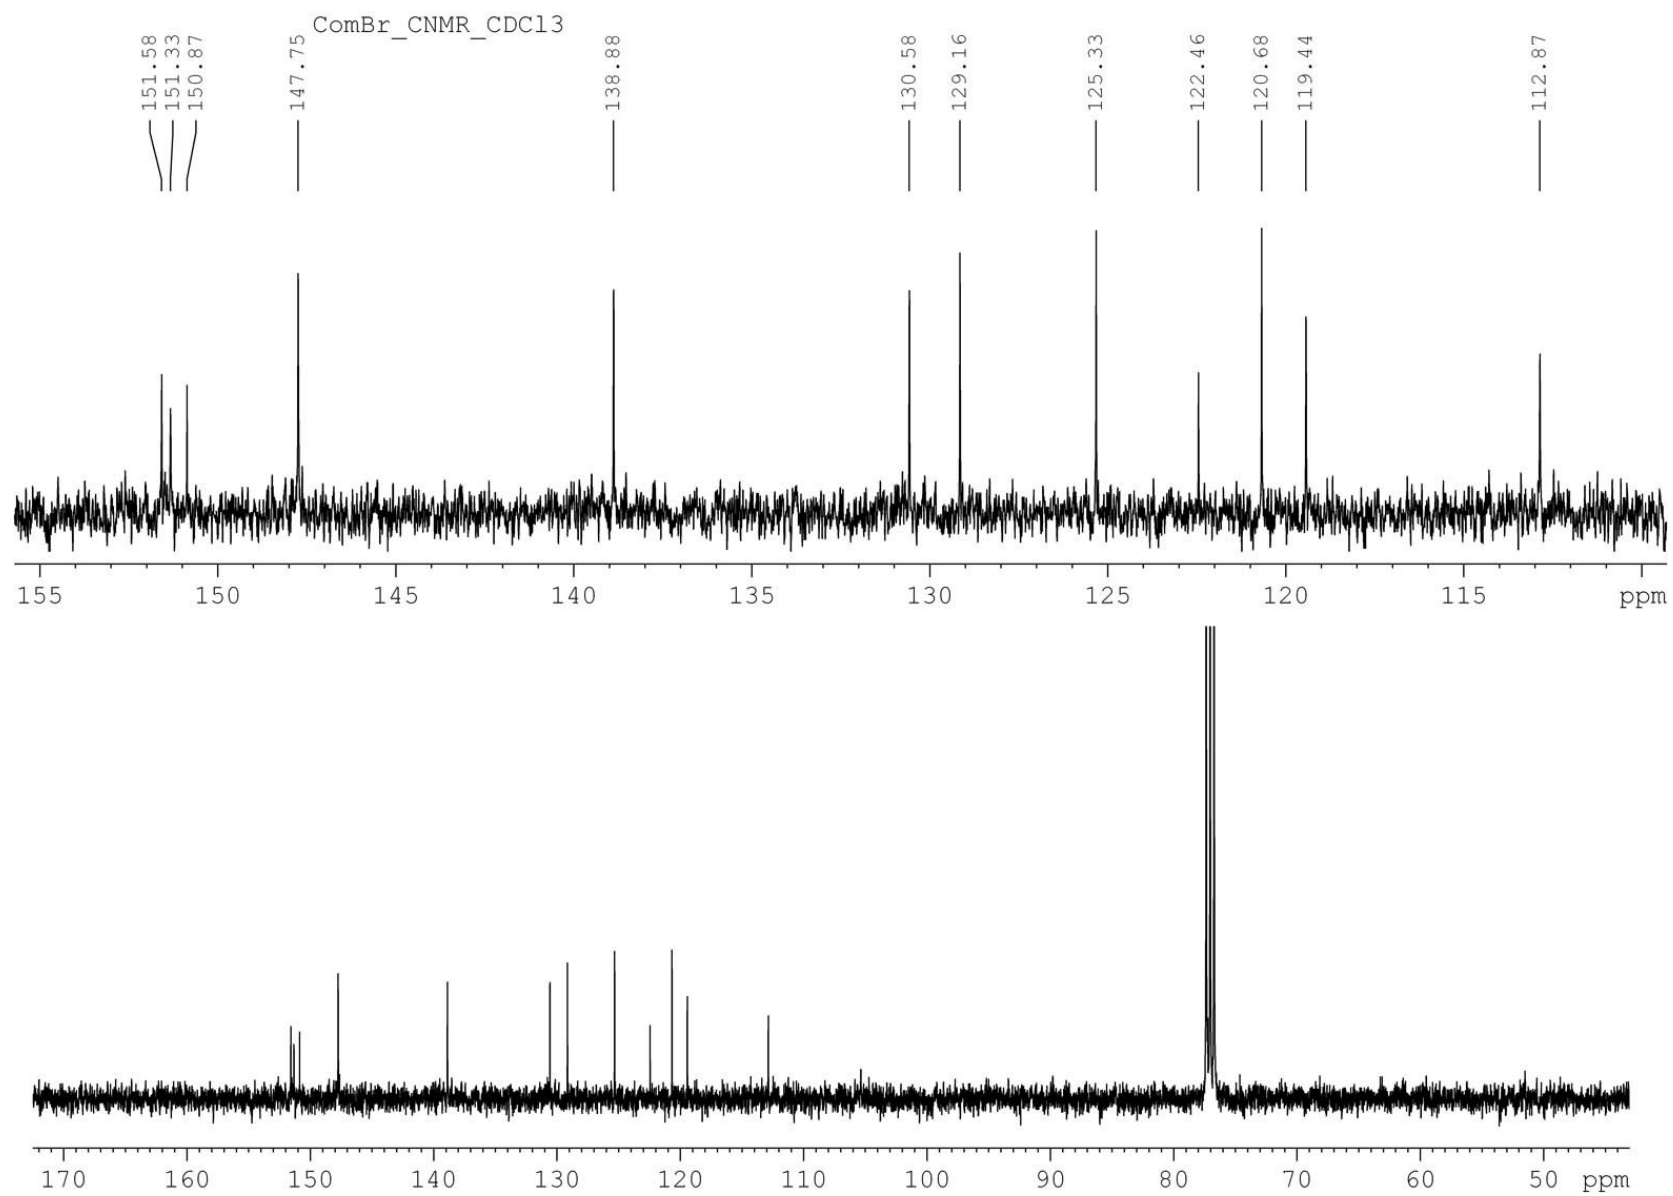

### 1.3.3. IR (ATR) data and spectra

1.3.3.1. **CppBr**: 3251 (w), 3163 (w), 3066 (w), 2960 (w), 2894 (w), 2802 (w), 1748 (s), 1601 (s), 1583 (m), 1543 (m), 1531 (s), 1505 (w), 1483 (s), 1420 (w).

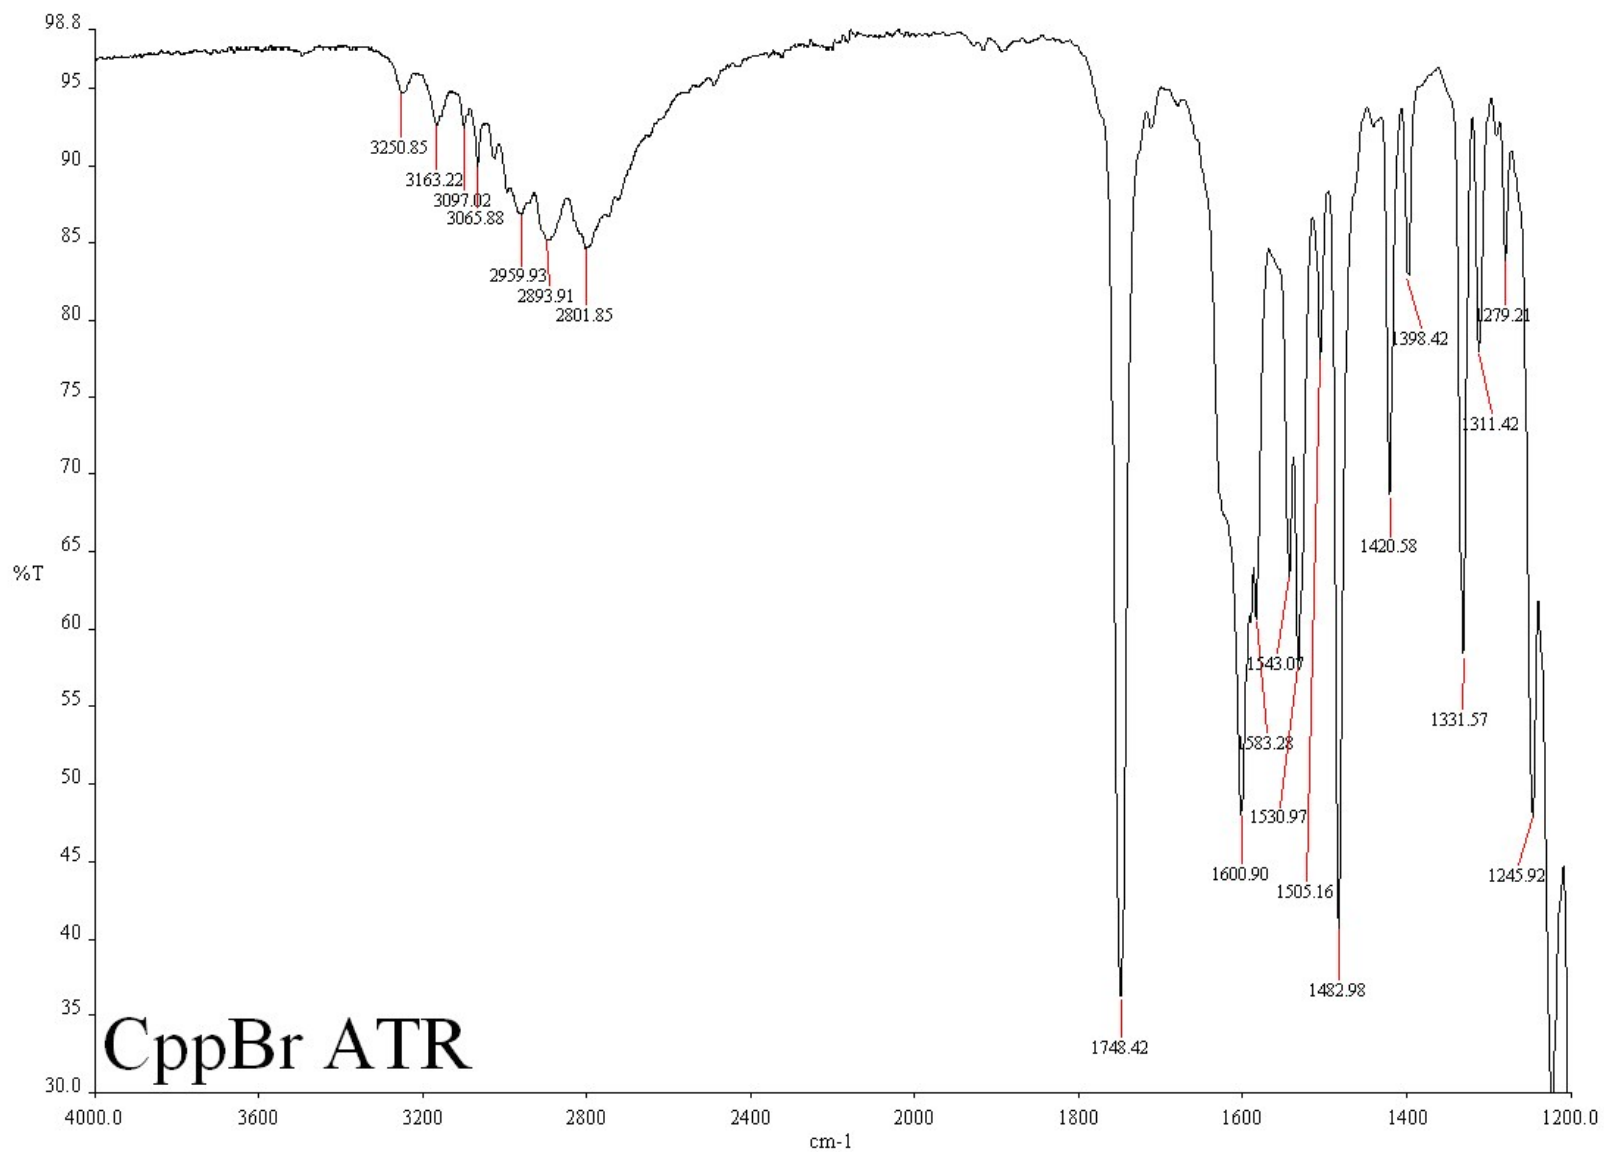



1.3.3.2. **CpmBr**: 3243 (w), 3161 (w), 3067 (w), 2957 (m), 2887 (m), 2798 (m), 1750 (m), 1625 (m), 1590 (s), 1541 (s), 1528 (s), 1505 (m), 1468 (s), 1419 (s).

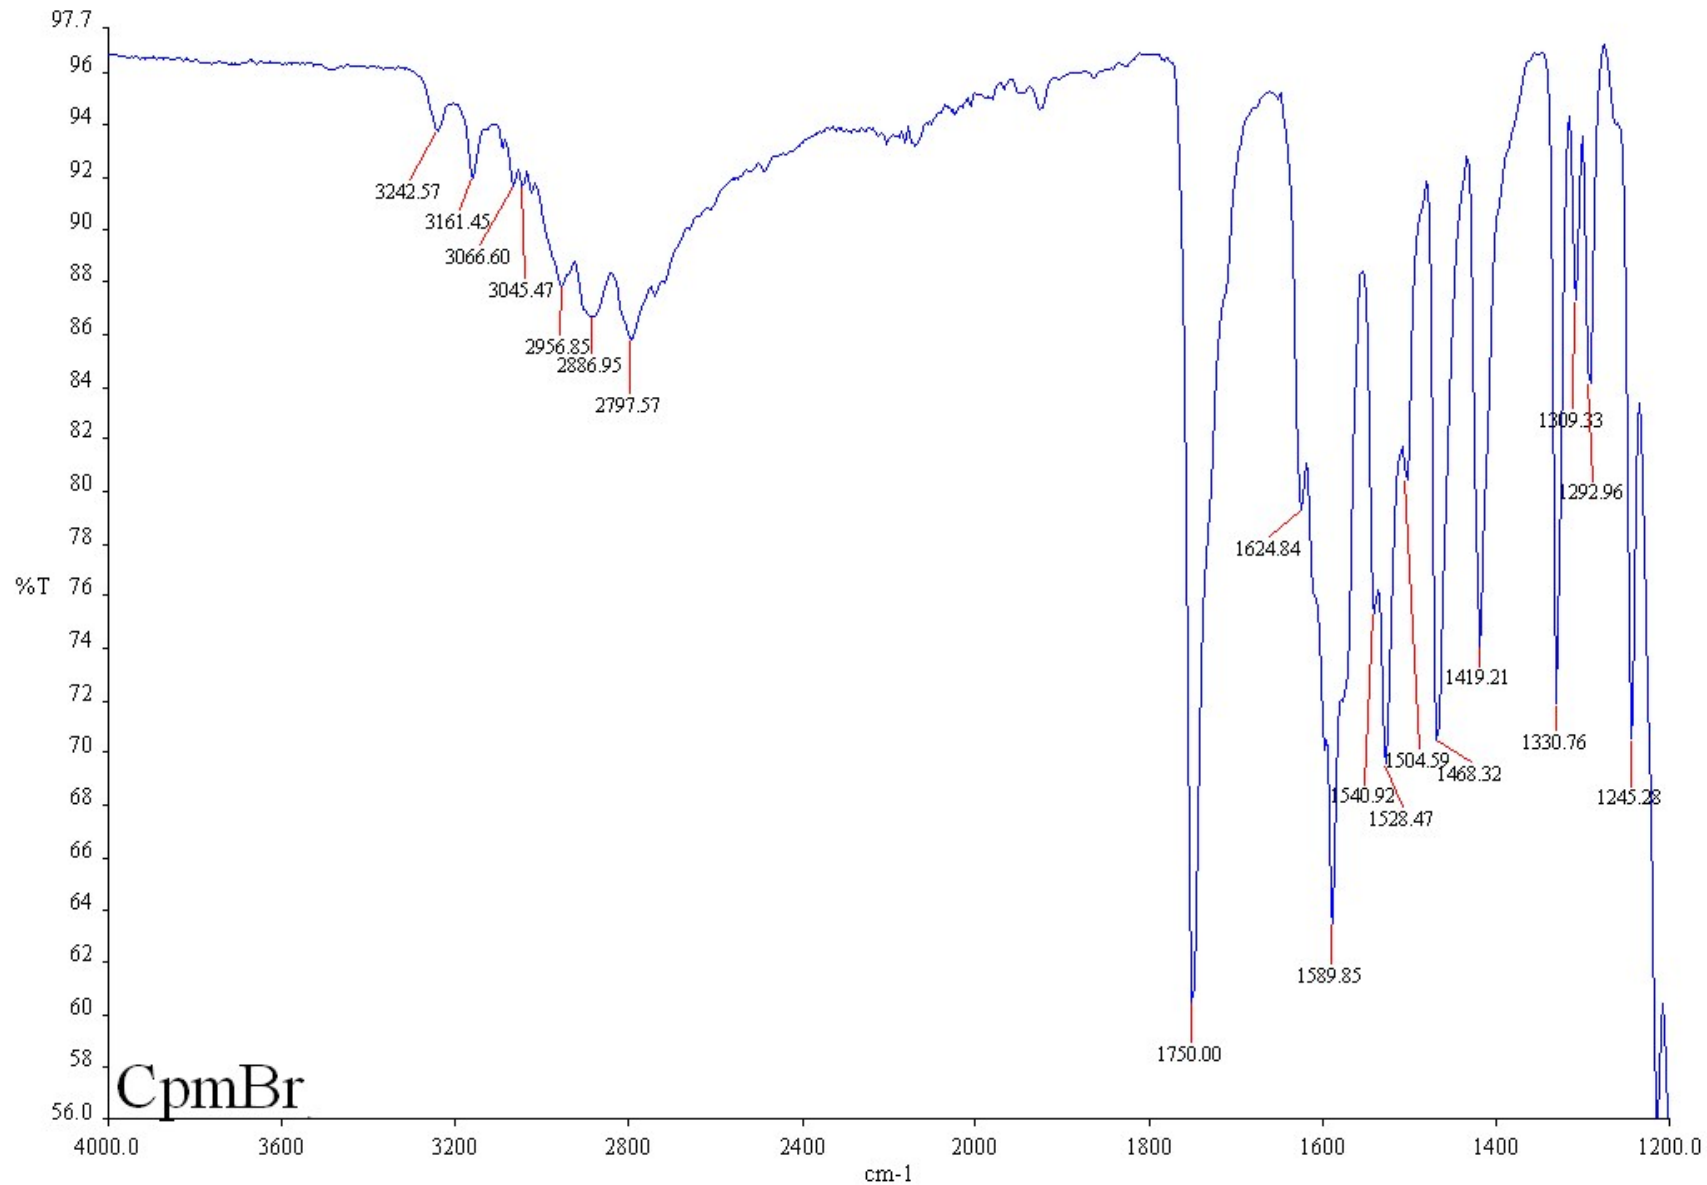

1.3.3.3. **CpoBr**: 3245 (w), 3160 (w), 3064 (w), 2959 (m), 2884 (m), 2795 (m), 1744.9 (s), 1599 (s), 1531 (s), 1509 (m), 1474 (s), 1443 (m), 1424 (s).

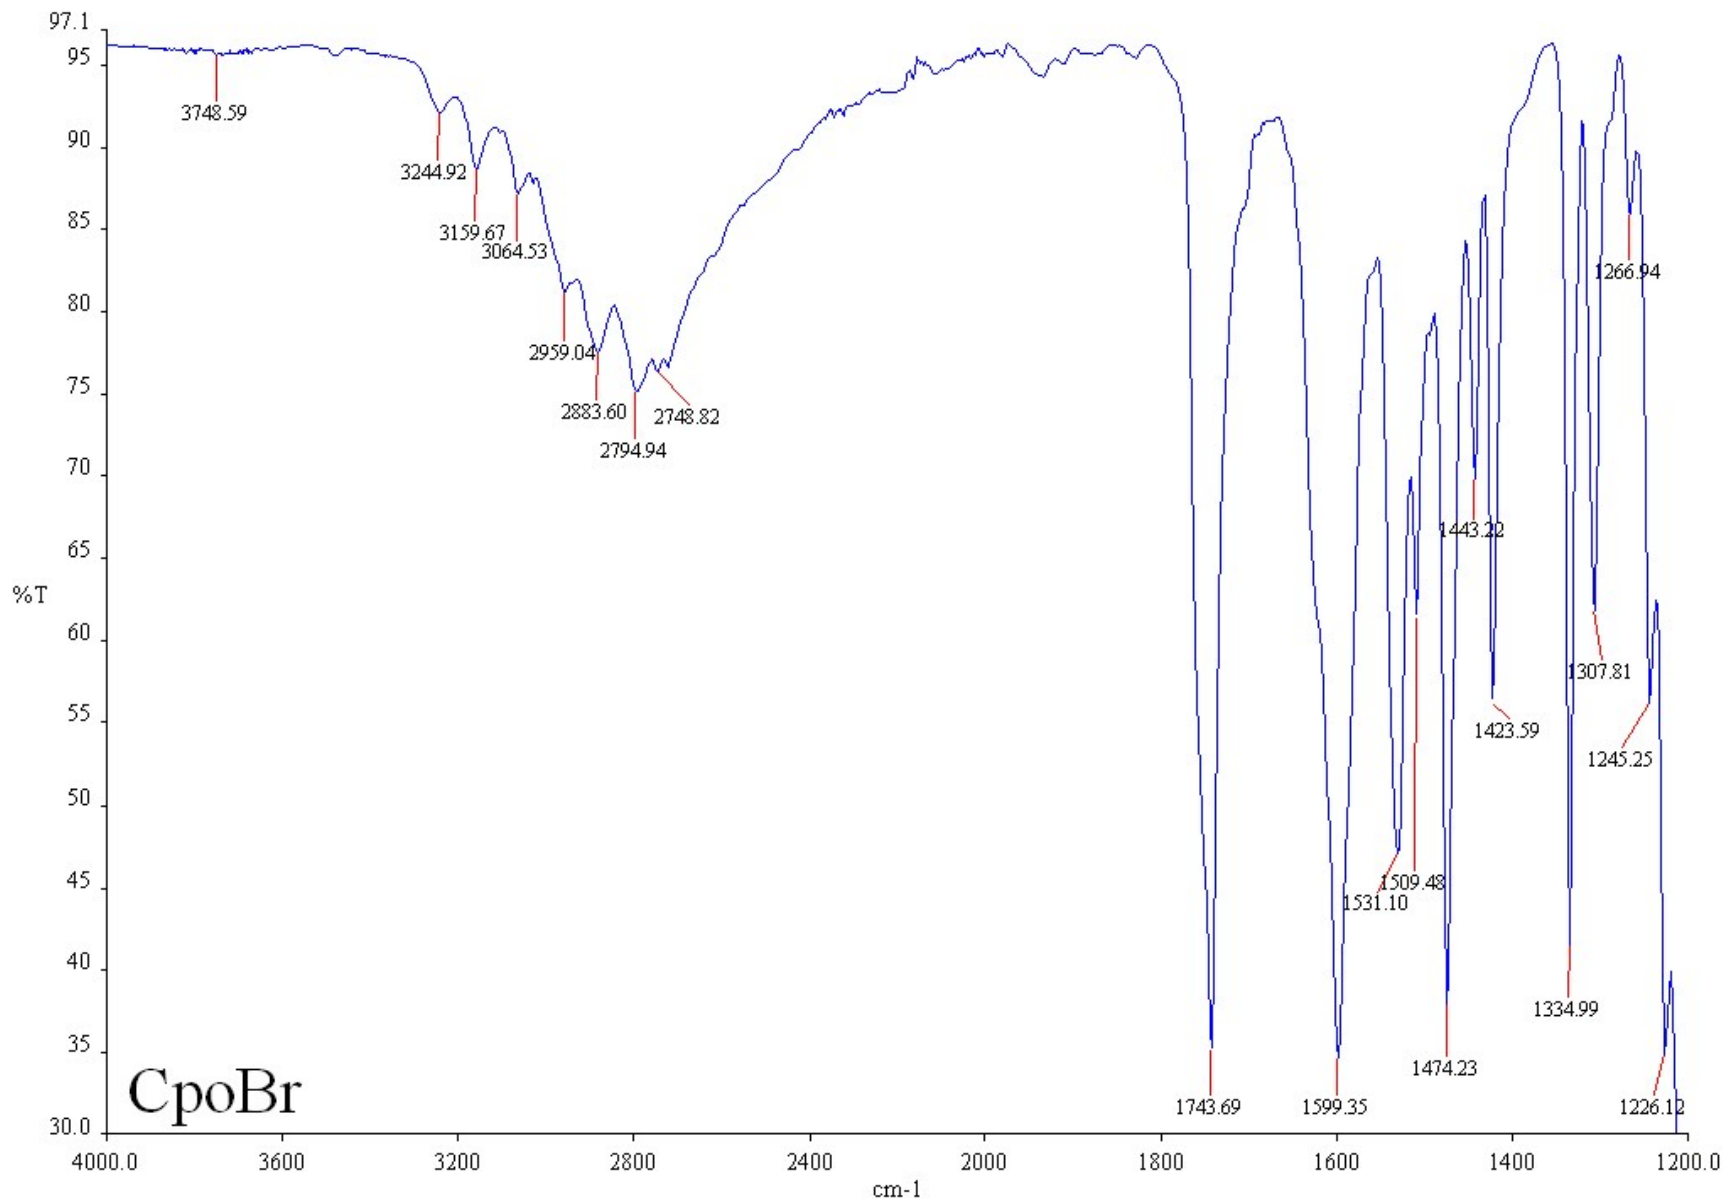

1.3.3.4. **CmpBr**: 3177 (w), 3094 (w), 3070 (w), 3045 (w), 2930 (w), 2815 (w), 1740 (s), 1607 (m), 1585 (s), 1558 (m), 1482 (s), 1423 (s), 1401 (m).

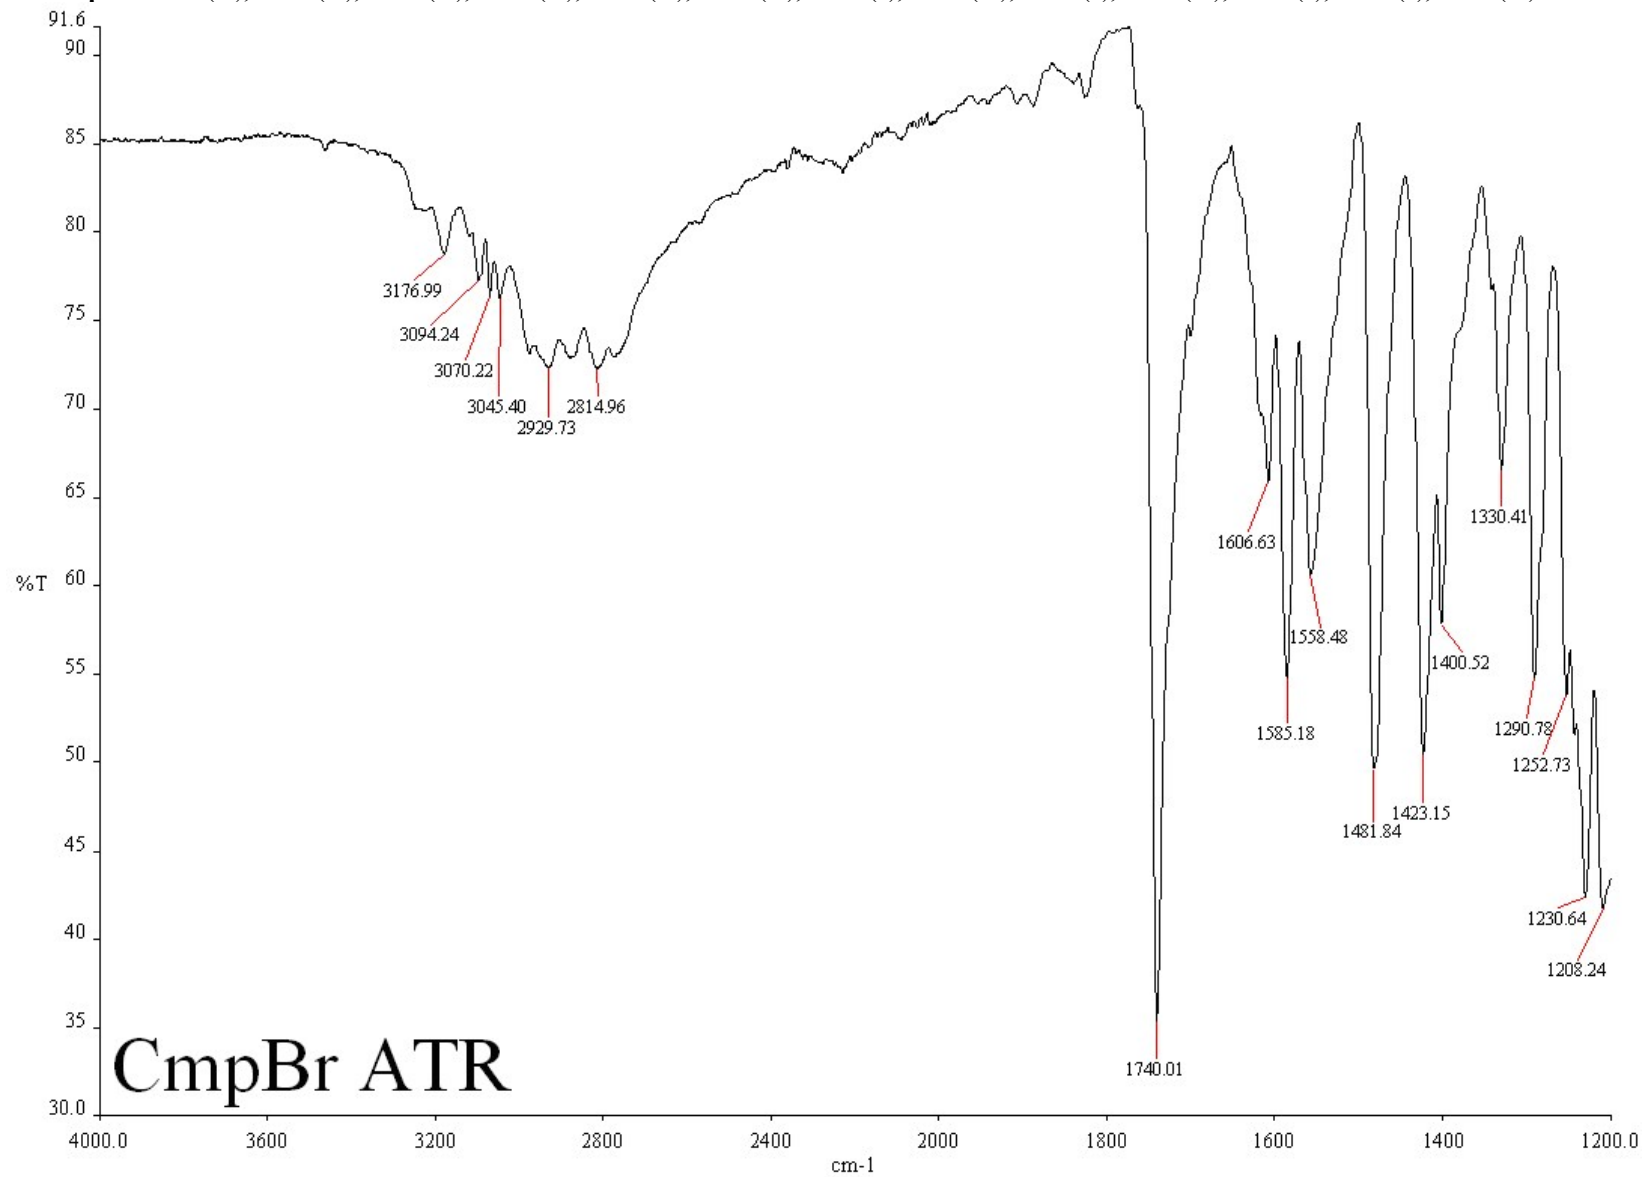

1.3.3.5. **CmmBr**: 3235 (w), 3181 (w), 3094 (w), 3042(w), 2932 (m), 2879 (m), 2814 (m), 1751 (s), 1741 (s), 1614 (m), 1588 (s), 1560 (s), 1471 (s), 1424 (s).

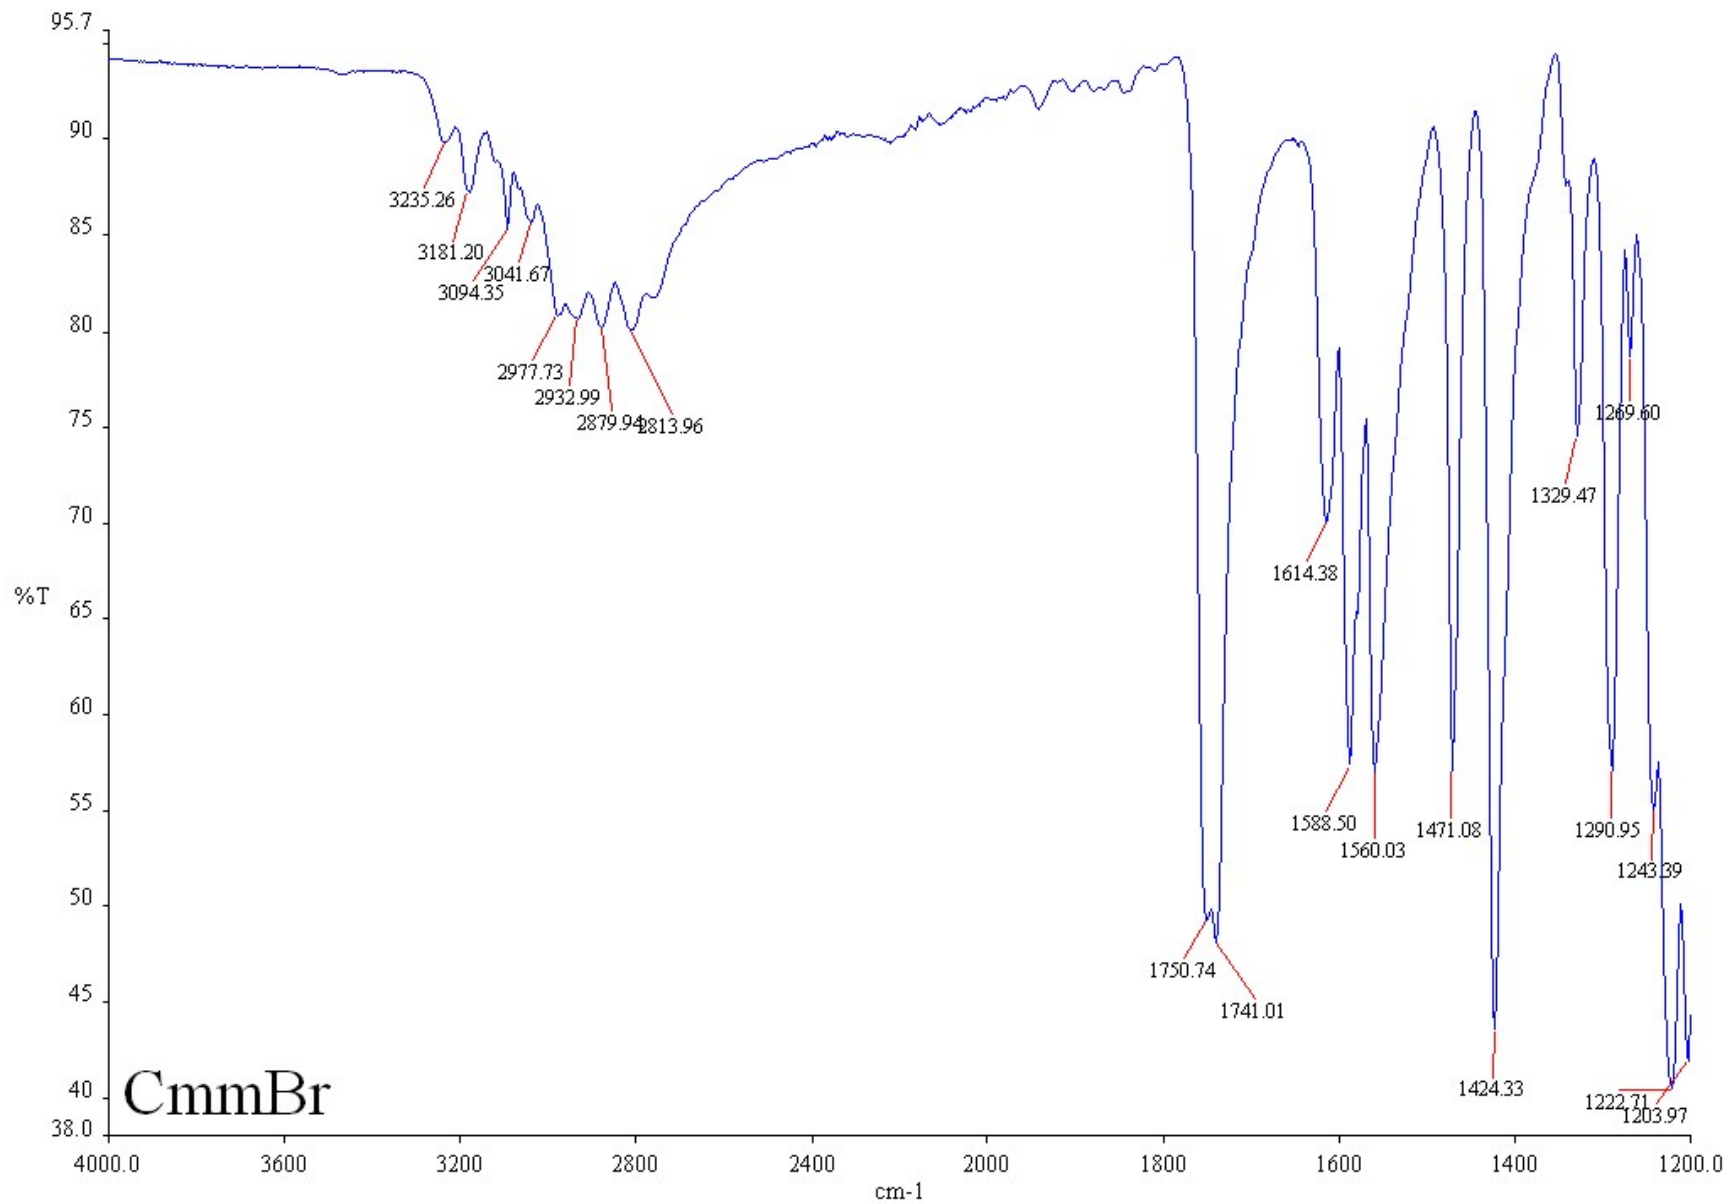

1.3.3.6. **CmoBr**: 3525 (m), 3178 (m), 3042 (m), 2990 (m), 2904 (w), 2842 (w), 1720 (s), 1655 (w), 1611 (m), 1553 (m), 1553 (s), 1484 (m), 1446 (m), 1414 (m).

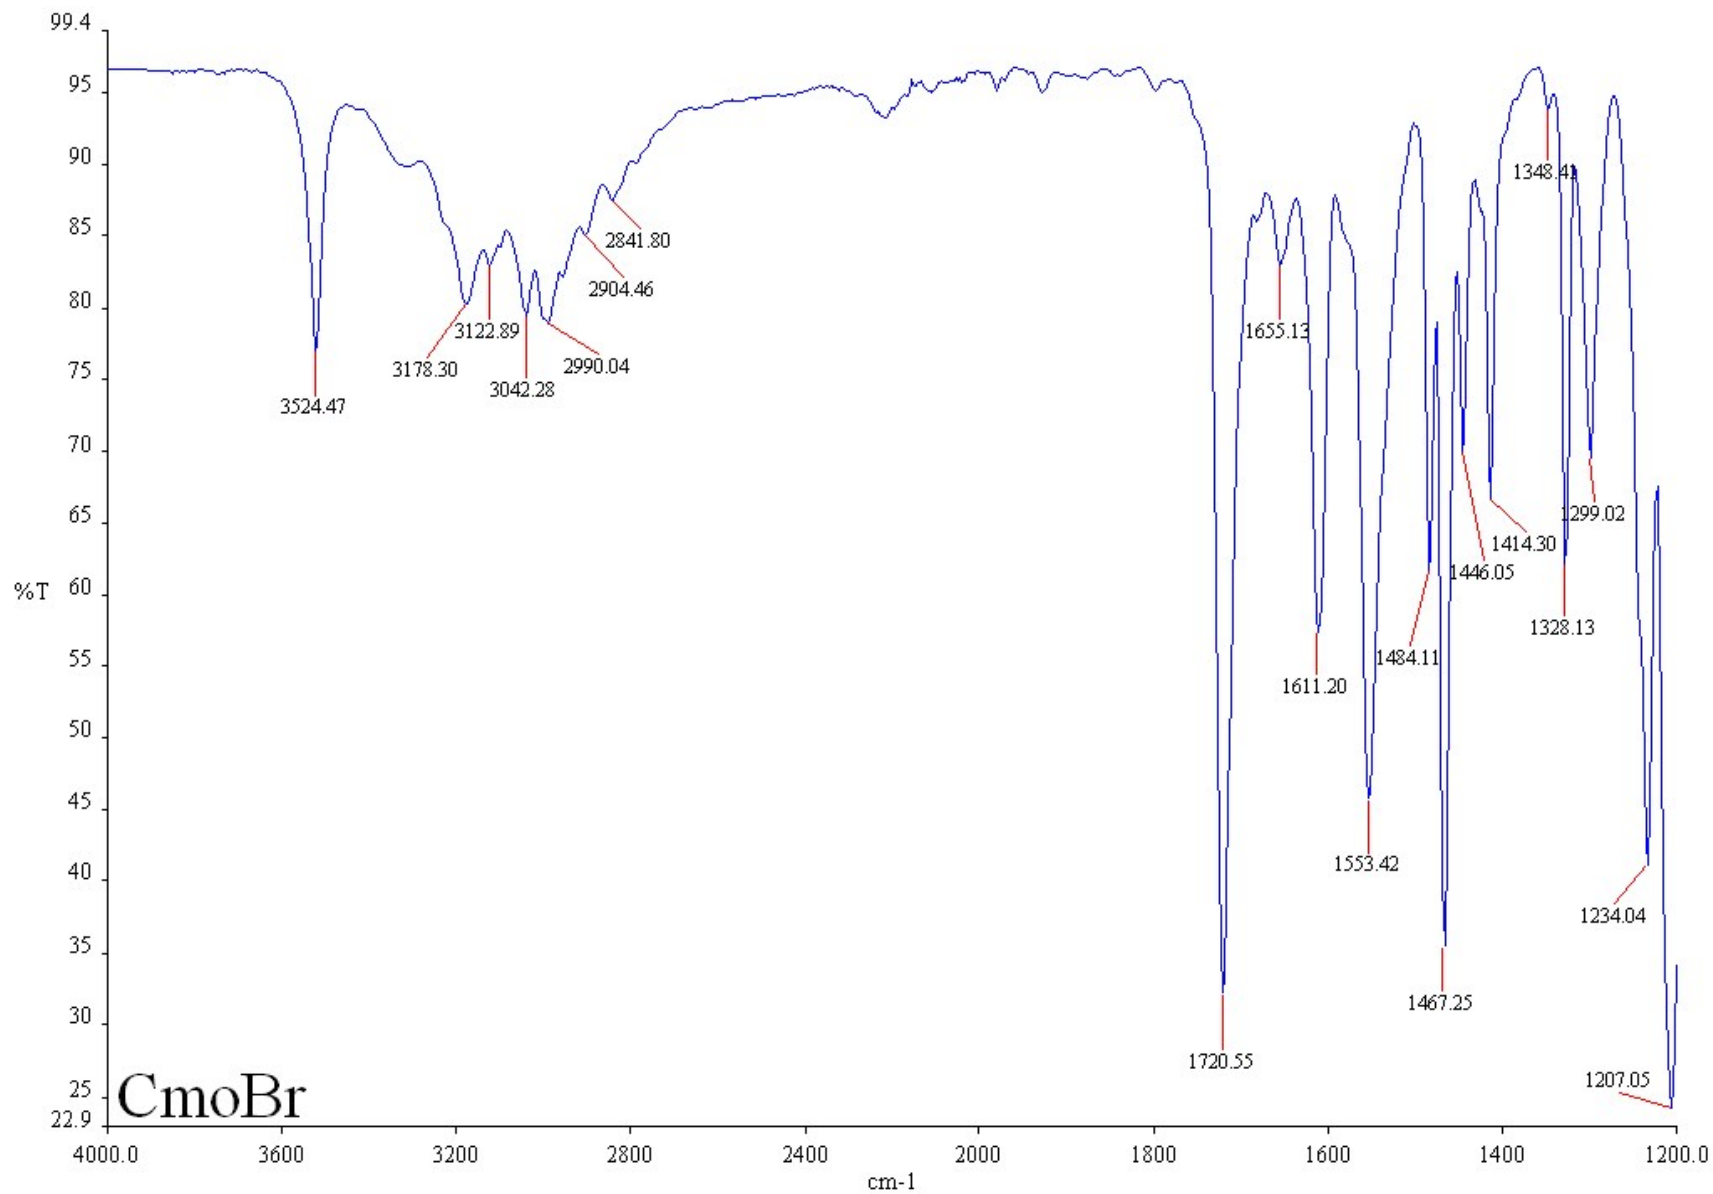

1.3.3.7. **CopBr**: 3481 (w), 3177 (w), 3096 (w), 2957 (m), 2828 (w), 1742 (s), 1706 (w), 1596 (s), 1581 (s), 1542 (s), 1484 (s), 1438 (s).

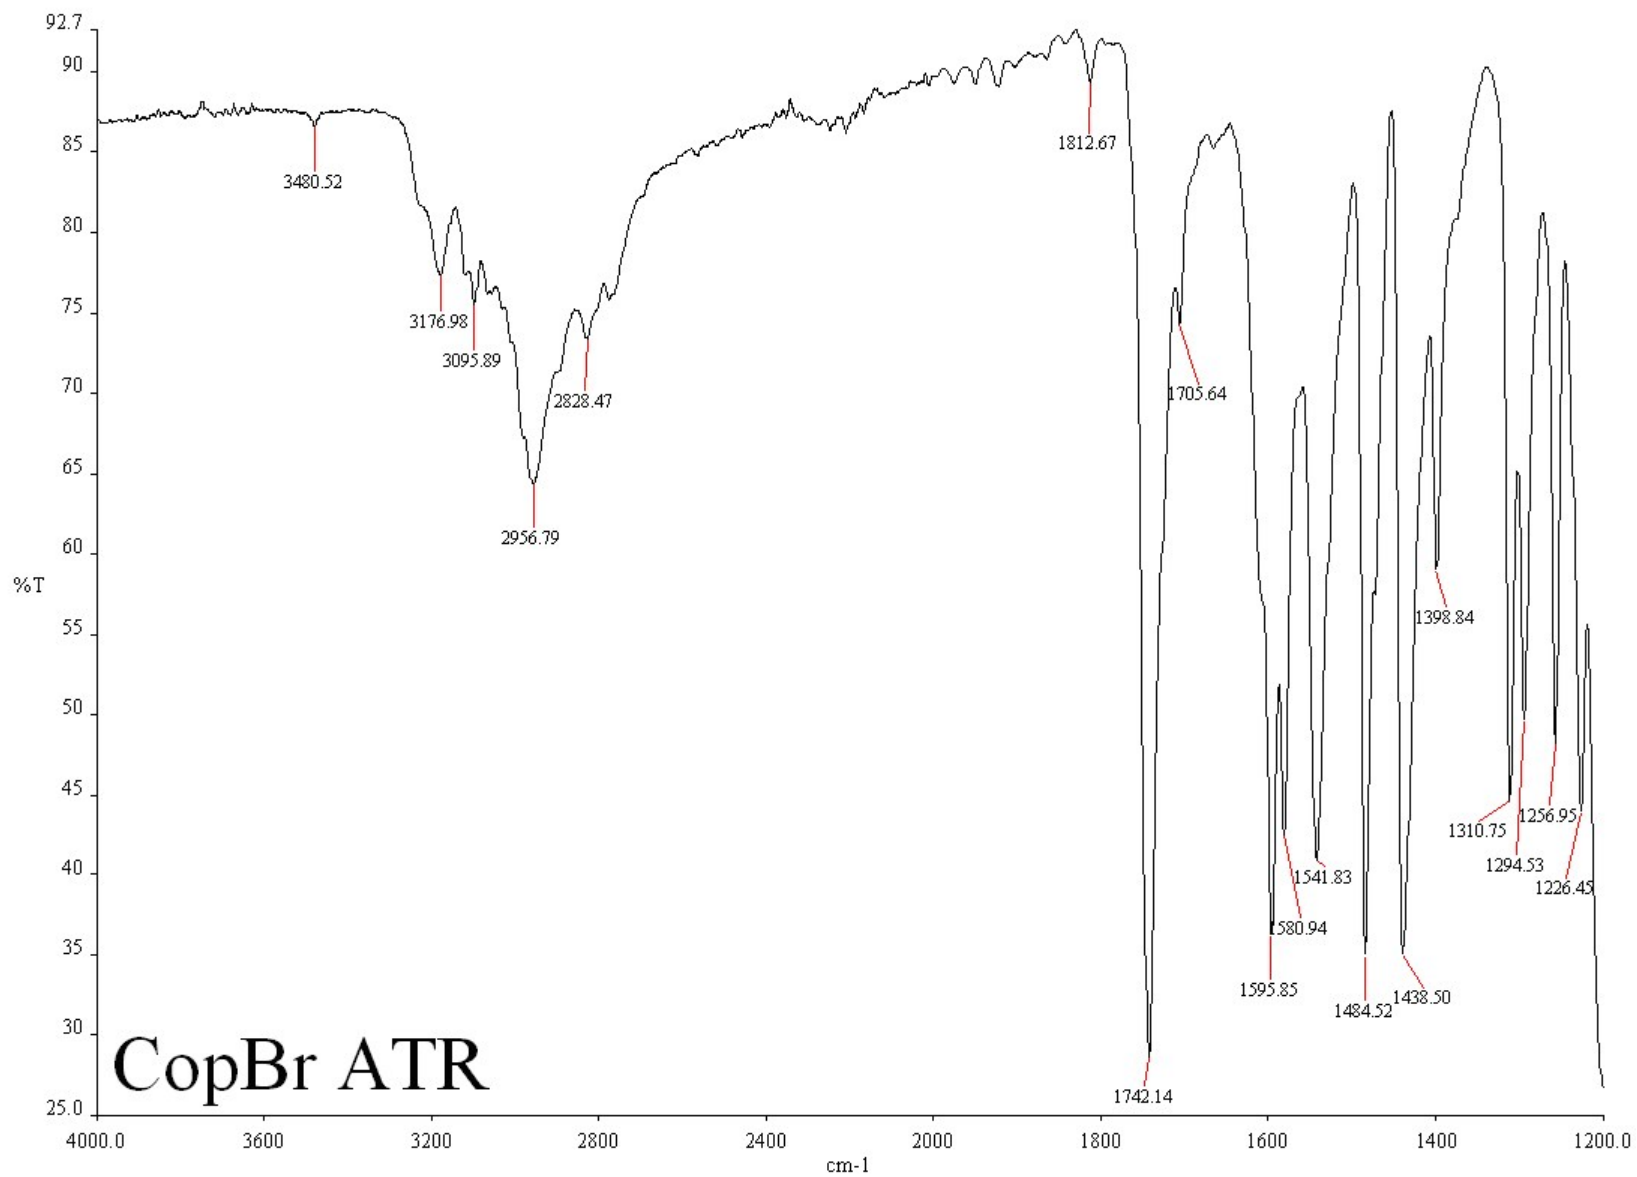

1.3.3.8. **ComBr**: 3177 (w), 3096 (w), 2956 (m), 2821 (w), 1742 (s), 1611 (m), 1586 (s), 1578 (s), 1539 (s) 1469 (s), 1439 (s), 1424 (m).

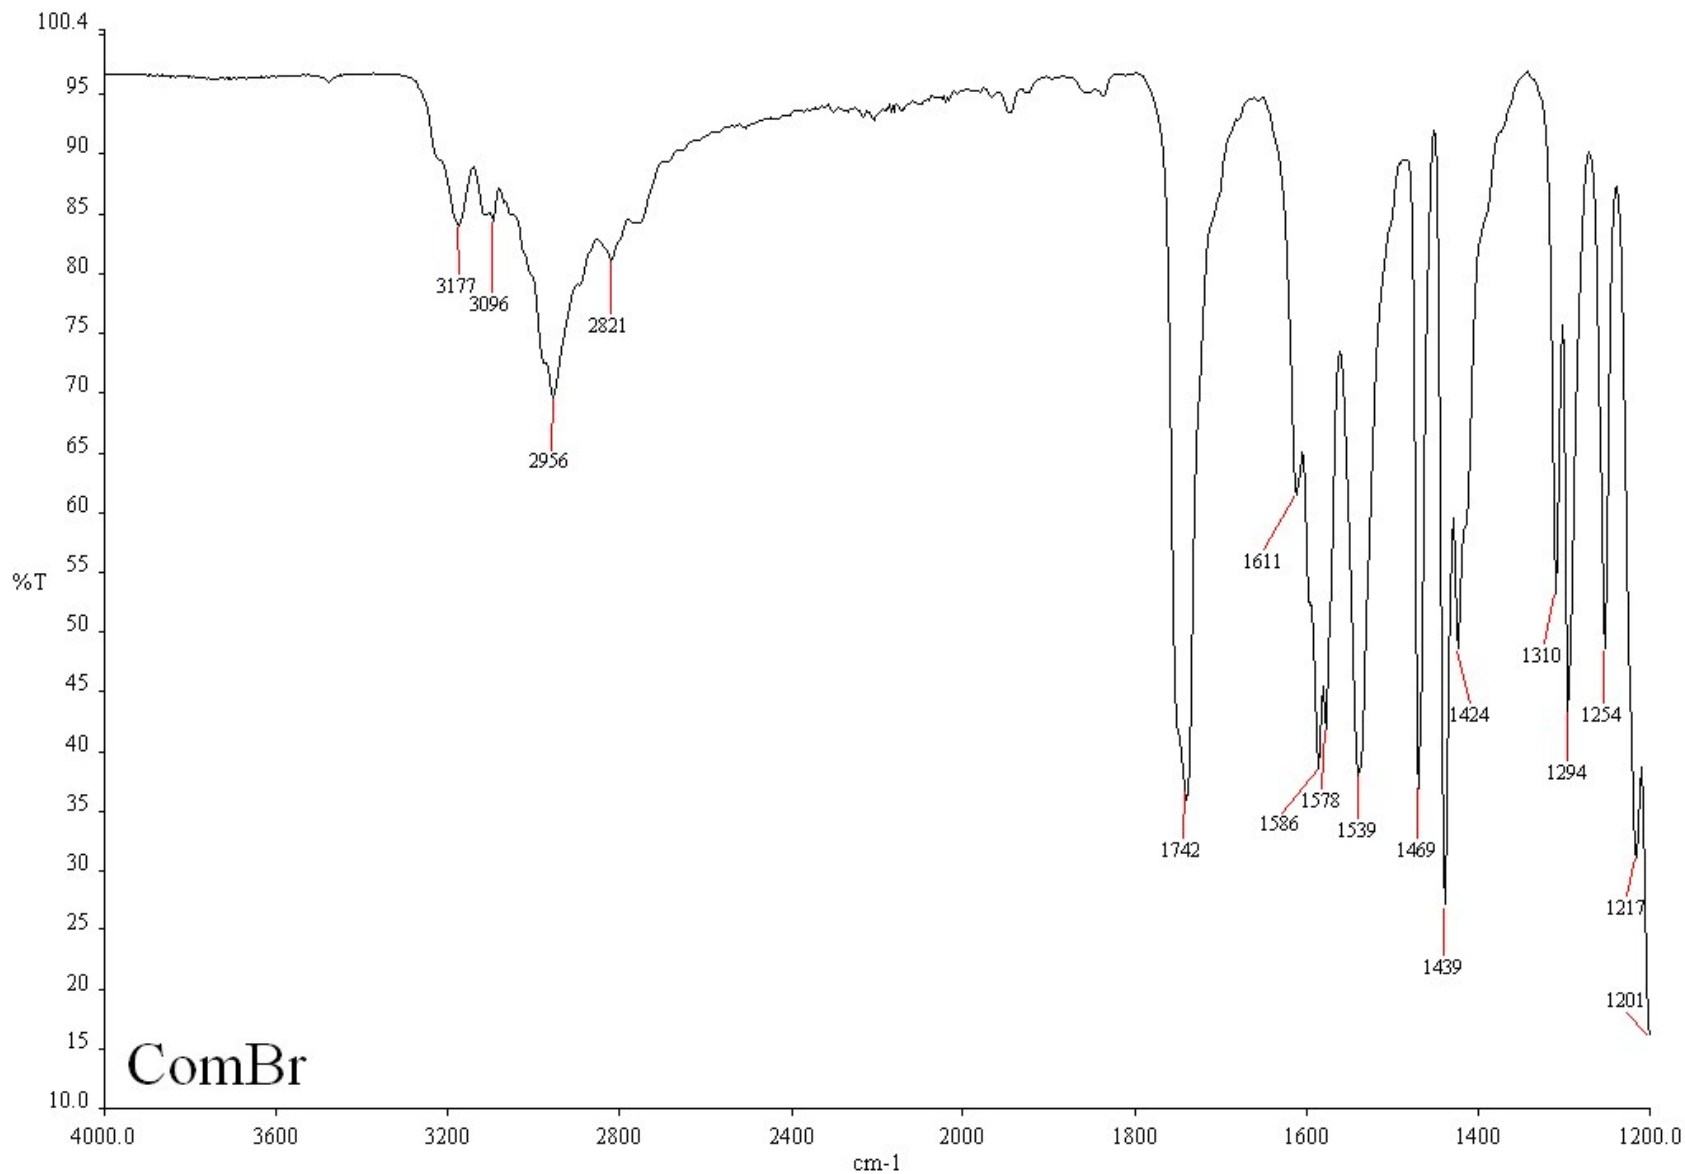

## **2. Crystal structure data**

**Pages 109-112**      **Full details available from CIF.**

**Table 1**              **Experimental details of the nine CmpX, CmmX and CopX structures.**

**Table 2**              **Selected hydrogen-bond parameters ( $\text{\AA}$ ,  $^\circ$ )**

**and**

**Page 123**              **Table 3: Summary of the CxxX isomer grids with selected structural features.**



**Table 1. Experimental details**

Experiments were undertaken at 294 K using a Xcalibur, Sapphire3, Gemini Ultra; Mo  $K\alpha$  radiation for eight structures and **CopBr** using Cu  $K\alpha$ .

| <b>Crystal data (crystal growth)</b>                            | <b>CmpF</b> (acetone:CHCl <sub>3</sub> )                                                     | <b>CmpCl</b> (acetone:CHCl <sub>3</sub> )                                                     | <b>CmpBr</b> (acetonitrile)                                    | <b>CmmF</b> (CHCl <sub>3</sub> )                                                          |
|-----------------------------------------------------------------|----------------------------------------------------------------------------------------------|-----------------------------------------------------------------------------------------------|----------------------------------------------------------------|-------------------------------------------------------------------------------------------|
| Chemical formula                                                | C <sub>12</sub> H <sub>9</sub> FN <sub>2</sub> O <sub>2</sub>                                | C <sub>12</sub> H <sub>9</sub> ClN <sub>2</sub> O <sub>2</sub>                                | C <sub>12</sub> H <sub>9</sub> BrN <sub>2</sub> O <sub>2</sub> | C <sub>12</sub> H <sub>9</sub> FN <sub>2</sub> O <sub>2</sub>                             |
| $M_r$                                                           | 232.21                                                                                       | 248.66                                                                                        | 293.12                                                         | 232.21                                                                                    |
| Crystal system, space group                                     | Monoclinic, <i>Pc</i>                                                                        | Monoclinic, <i>Pc</i>                                                                         | Monoclinic, <i>Pc</i>                                          | Monoclinic, <i>Cc</i>                                                                     |
| $a, b, c$ (Å)                                                   | 12.1578(3), 3.7938(1),<br>23.0837(6)                                                         | 12.9792(3), 3.8079(1),<br>23.0781(6)                                                          | 13.2502(3), 3.8621(1),<br>22.9979(8)                           | 26.1331(19), 3.7572(3),<br>11.9066(7)                                                     |
| $\alpha, \beta, \gamma$ (°)                                     | 90, 95.103(2), 90                                                                            | 90, 95.036(2), 90                                                                             | 90, 94.861(2), 90                                              | 90, 115.765(8), 90                                                                        |
| $V$ (Å <sup>3</sup> )                                           | 1060.50(5)                                                                                   | 1136.20(5)                                                                                    | 1172.65(6)                                                     | 1052.85(14)                                                                               |
| $Z$                                                             | 4                                                                                            | 4                                                                                             | 4                                                              | 4                                                                                         |
| $\mu$ (mm <sup>-1</sup> )                                       | 0.11                                                                                         | 0.33                                                                                          | 3.50                                                           | 0.11                                                                                      |
| Crystal size (mm)                                               | 0.43×0.38×0.10                                                                               | 0.33×0.18×0.08                                                                                | 0.15×0.15×0.05                                                 | 0.34×0.17×0.11                                                                            |
| <b>Data collection</b>                                          |                                                                                              |                                                                                               |                                                                |                                                                                           |
| Absorption correction                                           | Analytical (ABSFAC)                                                                          | Analytical (ABSFAC)                                                                           | Analytical (ABSFAC)                                            | Analytical (ABSFAC)                                                                       |
| $T_{\min}, T_{\max}$                                            | 0.959, 0.989                                                                                 | 0.921, 0.975                                                                                  | 0.577, 0.849                                                   | 0.970, 0.991                                                                              |
| Measured, independent, observed refl                            | 6916, 3554, 3158 $\{I > 2\sigma(I)\}$                                                        | 7270, 4260, 3727 $\{I > 2\sigma(I)\}$                                                         | 7123, 3624, 2408 $\{I > 2\sigma(I)\}$                          | 3146, 1683, 1344 $\{I > 2\sigma(I)\}$                                                     |
| $R_{\text{int}}$                                                | 0.023                                                                                        | 0.035                                                                                         | 0.059                                                          | 0.034                                                                                     |
| $\theta_{\text{max}}$ (°)                                       | 27.5                                                                                         | 27.5                                                                                          | 27.2                                                           | 27.1                                                                                      |
| $(\sin \theta/\lambda)_{\text{max}}$ (Å <sup>-1</sup> )         | 0.650                                                                                        | 0.649                                                                                         | 0.642                                                          | 0.642                                                                                     |
| <b>Refinement</b>                                               |                                                                                              |                                                                                               |                                                                |                                                                                           |
| $R[F^2 > 2\sigma(F^2)], wR(F^2), S$                             | 0.043, 0.106, 1.07                                                                           | 0.047, 0.129, 1.11                                                                            | 0.050, 0.090, 1.03                                             | 0.053, 0.126, 1.07                                                                        |
| No. of reflections                                              | 3554                                                                                         | 4260                                                                                          | 3624                                                           | 1683                                                                                      |
| No. of parameters                                               | 315                                                                                          | 315                                                                                           | 315                                                            | 158                                                                                       |
| No. of restraints                                               | 2                                                                                            | 2                                                                                             | 2                                                              | 2                                                                                         |
| H-atom treatment                                                | Mixed                                                                                        | Mixed                                                                                         | Mixed                                                          | Mixed                                                                                     |
| $\Delta_{\text{max}}, \Delta_{\text{min}}$ (e Å <sup>-3</sup> ) | 0.18, -0.14                                                                                  | 0.27, -0.23                                                                                   | 0.27, -0.30                                                    | 0.24, -0.17                                                                               |
| Absolute structure                                              | Flack x from 917 quotients<br>[(I+)-(I-)]/[(I+)+(I-)]<br>(Parsons, Flack & Wagner,<br>2013). | Flack x from 1310 quotients<br>[(I+)-(I-)]/[(I+)+(I-)]<br>(Parsons, Flack & Wagner,<br>2013). | Classical Flack method                                         | Flack x from 357 quotients<br>[(I+)-(I-)]/[(I+)+(I-)] (Parsons,<br>Flack & Wagner, 2013). |
| Absolute structure parameter                                    | 0.2(10)                                                                                      | 0.04(7)                                                                                       | 0.019(14)                                                      | -4.7(10)                                                                                  |

| <b>Crystal data (crystal growth)</b>                                                                                   | <b>CmmCl</b> (CHCl <sub>3</sub> :acetone:toluene)                                                                                      | <b>CmmBr</b> (CHCl <sub>3</sub> :CH <sub>3</sub> CN)           | <b>CopF</b> (CHCl <sub>3</sub> :acetone)                      | <b>CopCl</b> (CHCl <sub>3</sub> :acetone)                      | <b>CopBr</b> (THF)                                             |
|------------------------------------------------------------------------------------------------------------------------|----------------------------------------------------------------------------------------------------------------------------------------|----------------------------------------------------------------|---------------------------------------------------------------|----------------------------------------------------------------|----------------------------------------------------------------|
| Chemical formula                                                                                                       | C <sub>12</sub> H <sub>9</sub> ClN <sub>2</sub> O <sub>2</sub>                                                                         | C <sub>12</sub> H <sub>9</sub> BrN <sub>2</sub> O <sub>2</sub> | C <sub>12</sub> H <sub>9</sub> FN <sub>2</sub> O <sub>2</sub> | C <sub>12</sub> H <sub>9</sub> ClN <sub>2</sub> O <sub>2</sub> | C <sub>12</sub> H <sub>9</sub> BrN <sub>2</sub> O <sub>2</sub> |
| <i>M<sub>r</sub></i>                                                                                                   | 248.66                                                                                                                                 | 293.12                                                         | 232.21                                                        | 248.66                                                         | 293.12                                                         |
| Crystal system, space group                                                                                            | Monoclinic, <i>Ia</i>                                                                                                                  | Monoclinic, <i>P2<sub>1</sub></i>                              | Triclinic, <i>P<sup>-</sup>1</i>                              | Triclinic, <i>P<sup>-</sup>1</i>                               | Monoclinic, <i>P2<sub>1</sub>/n</i>                            |
| <i>a</i> , <i>b</i> , <i>c</i> (Å)                                                                                     | 12.0058(9),<br>3.7726(6),<br>24.477(3)                                                                                                 | 3.8827(5),<br>24.756(2),<br>17.742(2)                          | 3.8471(4),<br>11.6218(19),<br>12.467(2)                       | 3.8776(9),<br>11.481(4),<br>13.085(5)                          | 11.349(6),<br>3.9443(16),<br>26.137(8)                         |
| $\alpha$ , $\beta$ , $\gamma$ (°)                                                                                      | 90, 93.046(11), 90                                                                                                                     | 90, 91.789(14), 90                                             | 108.261(15),<br>90.417(11),<br>95.461(11)                     | 105.84(3),<br>90.64(2),<br>92.82(2)                            | 90, 101.34(5), 90                                              |
| <i>V</i> (Å <sup>3</sup> )                                                                                             | 1107.1(2)                                                                                                                              | 1704.5(3)                                                      | 526.52(14)                                                    | 559.5(3)                                                       | 1147.2(9)                                                      |
| <i>Z</i>                                                                                                               | 4                                                                                                                                      | 6                                                              | 2                                                             | 2                                                              | 4                                                              |
| $\mu$ (mm <sup>-1</sup> )                                                                                              | 0.34                                                                                                                                   | 3.61                                                           | 0.11                                                          | 0.33                                                           | 4.83                                                           |
| Crystal size (mm)                                                                                                      | 0.25×0.16×0.06                                                                                                                         | 0.30×0.11×0.09                                                 | 0.73×0.06×0.03                                                | 0.53×0.05×0.03                                                 | 0.52×0.07×0.01                                                 |
| <b>Data collection</b>                                                                                                 |                                                                                                                                        |                                                                |                                                               |                                                                |                                                                |
| Absorption correction                                                                                                  | Multi-scan (Empirical)                                                                                                                 | Multi-scan (Empirical)                                         | Analytical (ABSFAC)                                           | Multi-scan (Empirical)                                         | Multi-scan (Empirical)                                         |
| <i>T<sub>min</sub></i> , <i>T<sub>max</sub></i>                                                                        | 0.37, 1.00                                                                                                                             | 0.79, 1.00                                                     | 0.964, 0.996                                                  | 0.585, 1.000                                                   | 0.487, 1.000                                                   |
| Measured, independent, observed refl { <i>I</i> >2 $\sigma$ ( <i>I</i> )}                                              | 3732, 2059, 1100                                                                                                                       | 10527, 5993, 1546                                              | 5561, 1965, 1260                                              | 4234, 1972, 930                                                | 4128, 1718, 1169                                               |
| <i>R<sub>int</sub></i>                                                                                                 | 0.046                                                                                                                                  | 0.105                                                          | 0.043                                                         | 0.082                                                          | 0.053                                                          |
| $\theta_{\max}$ (°)                                                                                                    | 27.8                                                                                                                                   | 27.9                                                           | 26.5                                                          | 25.2                                                           | 61.2                                                           |
| ( $\sin \theta/\lambda$ ) <sub>max</sub> (Å <sup>-1</sup> )                                                            | 0.656                                                                                                                                  | 0.659                                                          | 0.627                                                         | 0.599                                                          | 0.568                                                          |
| <b>Refinement</b>                                                                                                      |                                                                                                                                        |                                                                |                                                               |                                                                |                                                                |
| <i>R</i> [ <i>F</i> <sup>2</sup> >2 $\sigma$ ( <i>F</i> <sup>2</sup> )], <i>wR</i> ( <i>F</i> <sup>2</sup> ), <i>S</i> | 0.081, 0.233, 1.05                                                                                                                     | 0.052, 0.096, 0.63                                             | 0.046, 0.114, 1.02                                            | 0.079, 0.224, 1.00                                             | 0.070, 0.215, 1.03                                             |
| No. of reflections                                                                                                     | 2059                                                                                                                                   | 5993                                                           | 1965                                                          | 1972                                                           | 1718                                                           |
| No. of parameters                                                                                                      | 154                                                                                                                                    | 460                                                            | 158                                                           | 158                                                            | 158                                                            |
| No. of restraints                                                                                                      | 2                                                                                                                                      | 39                                                             | 0                                                             | 0                                                              | 0                                                              |
| H-atom treatment                                                                                                       | Constrained                                                                                                                            | Constrained                                                    | Mixed                                                         | Mixed                                                          | Mixed                                                          |
| $\Delta$ ) <sub>max</sub> , $\Delta$ ) <sub>min</sub> (e Å <sup>-3</sup> )                                             | 0.48, -0.27                                                                                                                            | 0.63, -0.65                                                    | 0.15, -0.14                                                   | 0.31, -0.26                                                    | 0.87, -0.39                                                    |
| Absolute structure                                                                                                     | Flack x from 311 quotients [( <i>I</i> <sup>+</sup> )-( <i>I</i> <sup>-</sup> )]/[( <i>I</i> <sup>+</sup> )+( <i>I</i> <sup>-</sup> )] | Classical Flack method.                                        | –                                                             | –                                                              | –                                                              |
| Absolute structure parameter                                                                                           | 0.07 (10)                                                                                                                              | -0.008 (18)                                                    | –                                                             | –                                                              | –                                                              |

**Computer programs:** *CrysAlis PRO*, Agilent Technologies, Version 1.171.34.49 (release 20-01-2011 CrysAlis171 .NET) (compiled Jan 20 2011, 15:58:25), *CrysAlis PRO* 1.171.38.41 (Rigaku OD, 2015), *SHELXS14/7* (Sheldrick, 2014), *SHELXS2014/7* (Sheldrick, 2014), *SHELXL97*, *SHELXL14/7* (Sheldrick, 2008) & SORTX (McArdle, 1995), *SHELXL2014/7* (Sheldrick, 2014), *PLATON* (Spek, 2009), *SHELXL14/7*. Absorption correction ABSFAC, Clark and Reid, 1998); Multi-scan (Empirical SCALE3 ABSPACK) H atom treatment: H atoms treated by a mixture of independent and constrained refinement. Flack x determined using ??? quotients [(I+)-(I-)]/[(I+)+(I-)] (Parsons, Flack & Wagner, *Acta Cryst.* **B69** (2013) 249-259).

**Table 2. Selected hydrogen-bond parameters (Å, °)**

| <i>D—H···A</i>                 | <i>D—H</i> (in Å) | <i>H···A</i> (in Å) | <i>D···A</i> (in Å) | <i>D—H···A</i> (in °) |
|--------------------------------|-------------------|---------------------|---------------------|-----------------------|
| <b>CmpF</b>                    |                   |                     |                     |                       |
| N1A—H1A···N23B                 | 0.80(3)           | 2.20(3)             | 2.999(4)            | 174(3)                |
| N1B—H1B···N23A <sup>i</sup>    | 0.79(4)           | 2.16(4)             | 2.941(4)            | 179(4)                |
| C16A—H16A···O1B <sup>ii</sup>  | 0.93              | 2.30                | 3.201(4)            | 164                   |
| C16B—H16B···O1A <sup>iii</sup> | 0.93              | 2.43                | 3.313(4)            | 160                   |
| C22A—H22A···O1A                | 0.93              | 2.26                | 2.867(4)            | 122                   |
| C22B—H22B···O1B                | 0.93              | 2.55                | 2.933(4)            | 105                   |
| <b>CmpCl</b>                   |                   |                     |                     |                       |
| N1A—H1A···N23B                 | 0.82(4)           | 2.16(4)             | 2.980(5)            | 176(4)                |
| N1B—H1B···N23A <sup>i</sup>    | 0.80(4)           | 2.13(4)             | 2.929(5)            | 173(4)                |
| C16A—H16A···O1B <sup>ii</sup>  | 0.93              | 2.29                | 3.193(5)            | 163                   |
| C16B—H16B···O1A <sup>iii</sup> | 0.93              | 2.42                | 3.299(5)            | 157                   |
| C22A—H22A···O1A                | 0.93              | 2.28                | 2.879(5)            | 122                   |
| C22B—H22B···O1B                | 0.93              | 2.54                | 2.929(5)            | 106                   |
| <b>CmpBr</b>                   |                   |                     |                     |                       |
| N1A—H1A···N23B                 | 0.84(8)           | 2.17(9)             | 2.985(9)            | 164(8)                |
| N1B—H1B···N23A <sup>i</sup>    | 0.89(7)           | 2.04(7)             | 2.927(9)            | 171(6)                |
| C16A—H16A···O1B <sup>ii</sup>  | 0.93              | 2.30                | 3.199(9)            | 163                   |
| C16B—H16B···O1A <sup>iii</sup> | 0.93              | 2.42                | 3.296(10)           | 157                   |
| C22A—H22A···O1A                | 0.93              | 2.27                | 2.881(9)            | 122                   |
| C22B—H22B···O1B                | 0.93              | 2.55                | 2.934(9)            | 105                   |
| C22B—H22B···O2A                | 0.93              | 2.60                | 3.312(8)            | 133                   |
| <b>CmmF</b>                    |                   |                     |                     |                       |
| N1—H1···N23 <sup>iv</sup>      | 0.86(7)           | 2.10(7)             | 2.950(5)            | 173(5)                |
| C16—H16···O1 <sup>i</sup>      | 0.93              | 2.38                | 3.254(5)            | 157                   |
| C22—H22···O1                   | 0.93              | 2.47                | 2.920(6)            | 110                   |

| <b>CmmCl</b>                   |         |         |           |        |
|--------------------------------|---------|---------|-----------|--------|
| N1—H1···N23 <sup>v</sup>       | 0.86    | 2.10    | 2.948(11) | 167    |
| C16—H16···O1 <sup>vi</sup>     | 0.93    | 2.35    | 3.223(12) | 155    |
| C22—H22···O1                   | 0.93    | 2.45    | 2.913(14) | 111    |
| <b>CmmBr</b>                   |         |         |           |        |
| N1A—H1A···N23B                 | 0.86    | 2.03    | 2.88(2)   | 172    |
| C16A—H16A···O1B <sup>vii</sup> | 0.93    | 2.41    | 3.27(2)   | 154    |
| N1B—H1B···N23C                 | 0.86    | 2.17    | 3.02(2)   | 170    |
| C16B—H16B···O1C <sup>vii</sup> | 0.93    | 2.28    | 3.18(2)   | 163    |
| N1C—H1C···N23A <sup>viii</sup> | 0.86    | 2.08    | 2.94(2)   | 176    |
| C22B—H22B···O1B                | 0.93    | 2.32    | 2.89(2)   | 119    |
| <b>CopF</b>                    |         |         |           |        |
| N1—H1···N22 <sup>ix</sup>      | 0.91(2) | 2.08(3) | 2.994(3)  | 175(2) |
| C23—H23···O2 <sup>ix</sup>     | 0.93    | 2.57    | 3.271(3)  | 133    |
| C26—H26···O1                   | 0.93    | 2.28    | 2.868(3)  | 121    |
| <b>CopCl</b>                   |         |         |           |        |
| N1—H1···N22 <sup>ix</sup>      | 0.86(5) | 2.15(5) | 3.001(7)  | 170(4) |
| C23—H23···O2 <sup>ix</sup>     | 0.93    | 2.57    | 3.267(8)  | 133    |
| C26—H26···O1                   | 0.93    | 2.29    | 2.872(7)  | 121    |
| C13—H13···O1 <sup>x</sup>      | 0.93    | 2.53    | 3.425(8)  | 163    |
| <b>CopBr</b>                   |         |         |           |        |
| N1—H1···N22 <sup>xi</sup>      | 0.86(8) | 2.14(8) | 2.975(8)  | 163(7) |
| C15—H15···O1 <sup>xii</sup>    | 0.93    | 2.40    | 3.307(9)  | 165    |
| C23—H23···O2 <sup>xi</sup>     | 0.93    | 2.58    | 3.290(9)  | 134    |
| C26—H26···O1                   | 0.93    | 2.26    | 2.850(9)  | 121    |

**Symmetry code(s):** (i)  $x, -y+1, z-1/2$ ; (ii)  $x, y-1, z$ ; (iii)  $x, -y+2, z-1/2$ ; (iv)  $x, -y, z-1/2$ ; (v)  $x+1/2, -y+2, z$ ; (vi)  $x+1/2, -y+3, z$ ; (vii)  $x+1, y, z$ ; (viii)  $x-1, y, z-1$ ; (ix)  $-x+2, -y+1, -z$ ; (x)  $-x+2, -y+1, -z+1$ ; (xi)  $-x+1, -y, -z+1$ ; (xii)  $-x+1/2, y-1/2, -z+1/2$ .

### ***3. Ab initio calculations***

#### **Pages 114-122**

- CxxF**      Optimisation results; PES scans of **C-rings** and **F-rings**; PES scans of carbamate backbone
- CxxCl**     Optimisation results; PES scans of **C-rings** and **Cl-rings**; PES scans of carbamate backbone
- CxxBr**     Optimisation results; PES scans of **C-rings** and **Br-rings**; PES scans of carbamate backbone

### **3.1. CxxF isomer grid**

#### **3.1.1. CxxF Optimisation results**

| <b>CxxF</b> | $\alpha/^\circ$ | $\beta/^\circ$ | $\gamma/^\circ$ | $\delta/^\circ$ |
|-------------|-----------------|----------------|-----------------|-----------------|
| <b>CppF</b> | -0.67           | 121.00         | -0.24           | 0.21            |
| <b>CpmF</b> | 0.10            | 125.69         | -0.80           | -0.62           |
| <b>CpoF</b> | -0.03           | 75.37          | 6.28            | 1.00            |
| <b>CmpF</b> | -0.87           | 121.19         | -0.25           | -0.05           |
| <b>CmmF</b> | -0.29           | 56.8           | 0.89            | 0.72            |
| <b>CmoF</b> | -1.39           | 74.54          | 6.30            | 1.06            |
| <b>CopF</b> | -0.32           | 121.65         | -0.29           | -0.16           |
| <b>ComF</b> | -0.65           | 56.02          | 0.82            | 0.75            |
| <b>CooF</b> | -0.98           | 74.20          | 5.56            | 0.82            |

**Details as in the main body of manuscript.**

### 3.1.2. Conformational analysis results

#### 3.1.2.1. Potential energy surface (PES) scans of C-rings and F-rings in nine CxxF conformers (rotamers)

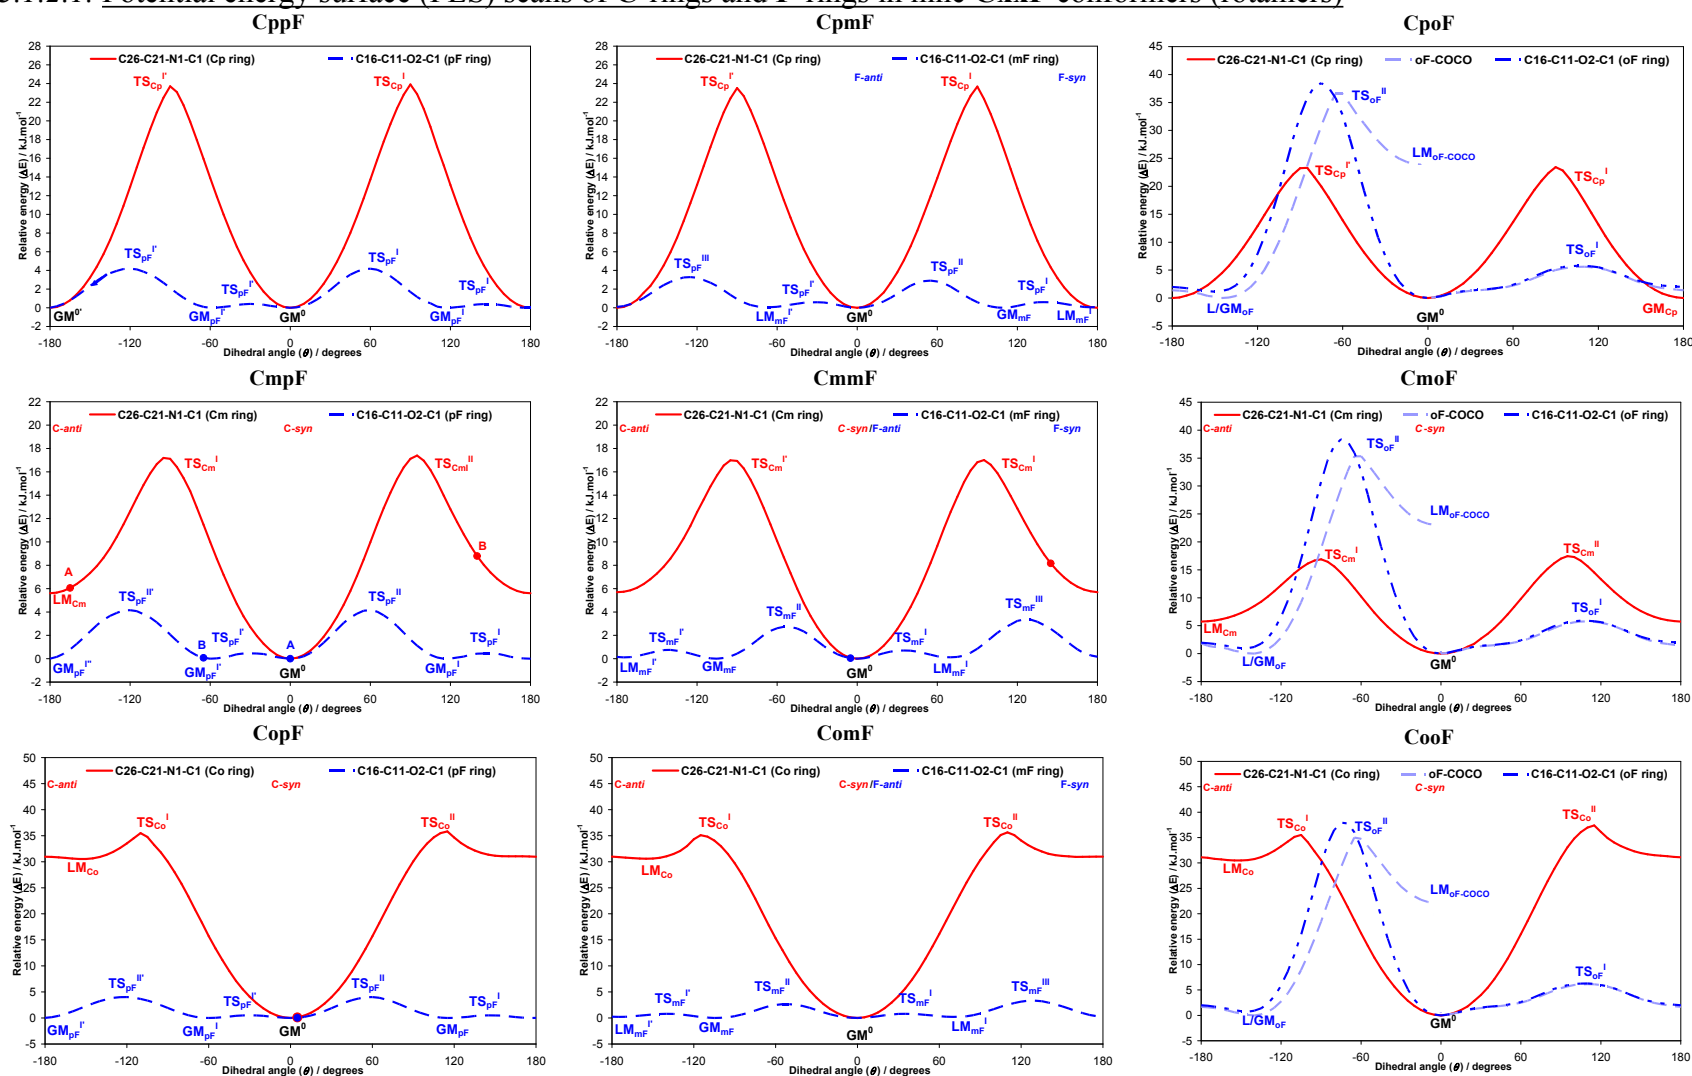

### 3.1.2.2. Potential energy surface (PES) scans of carbamate backbone dihedral angles in nine CxxF conformers (rotamers)

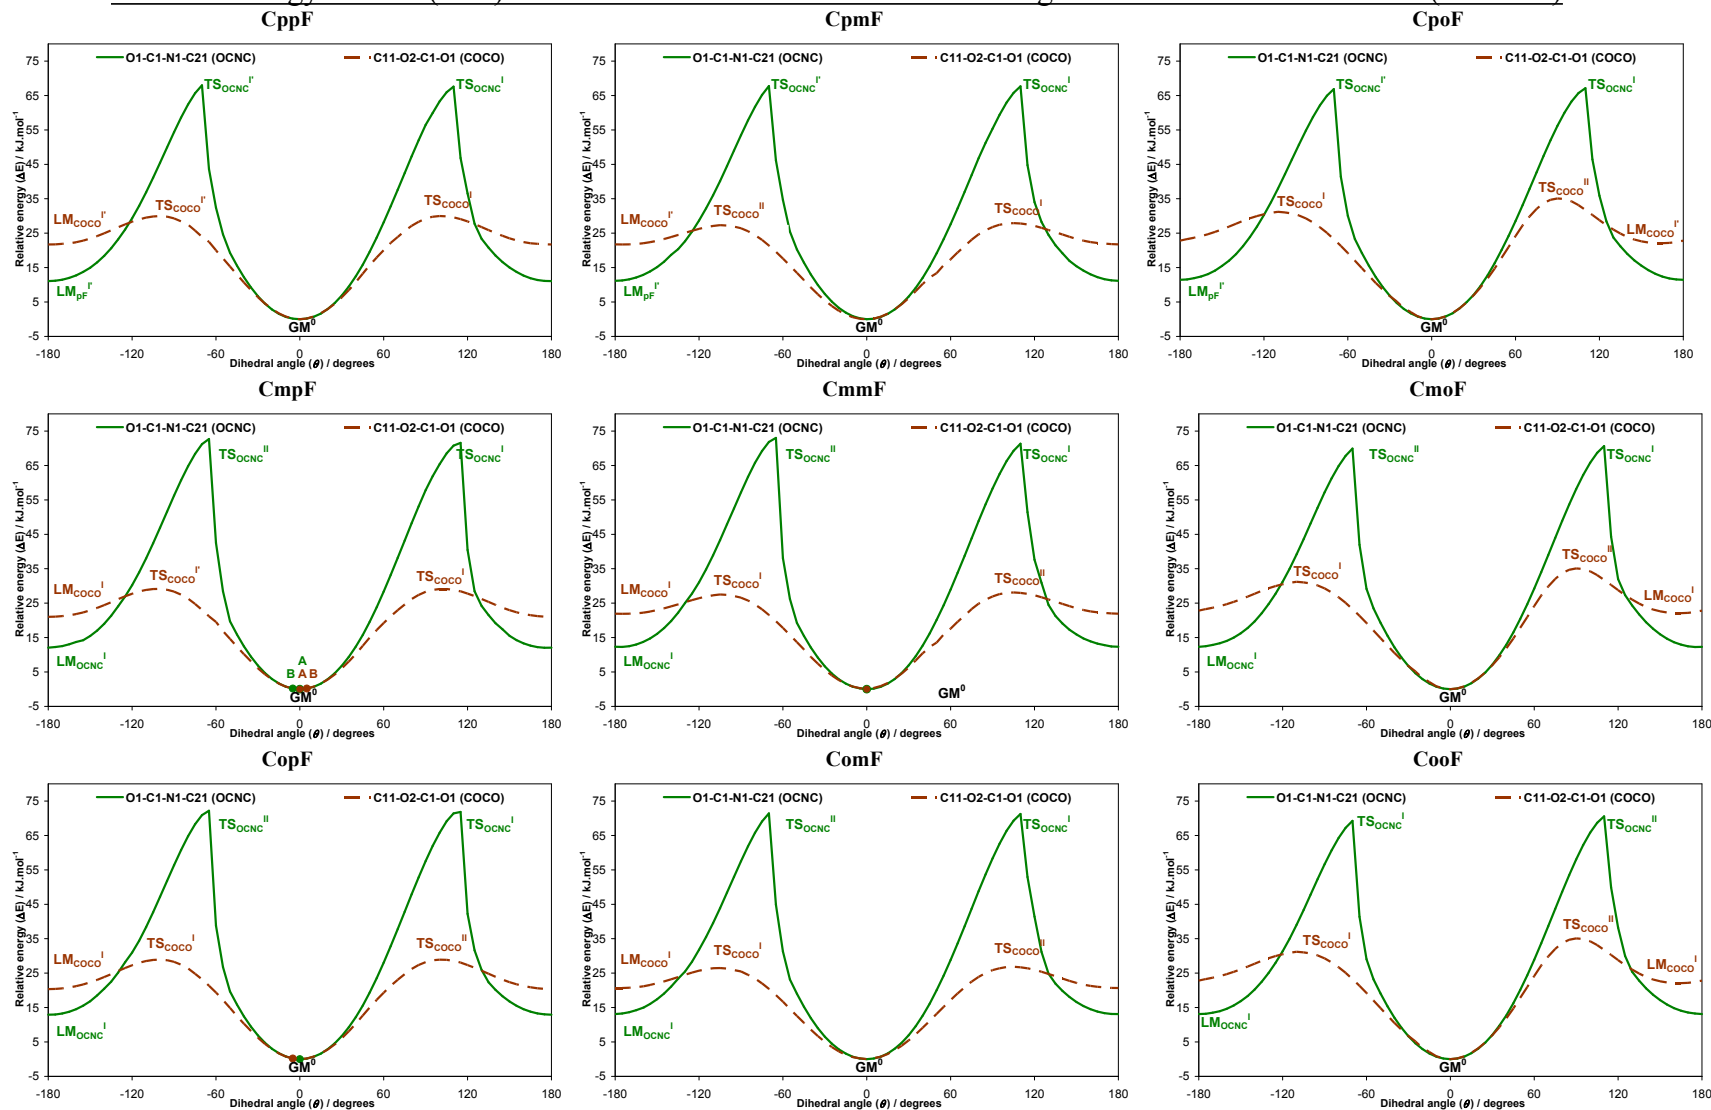



## **3.2. CxxCl isomer grid**

### **3.2.1. CxxCl Optimisation results**

| <b>CxxCl</b> | $\alpha/^\circ$ | $\beta/^\circ$ | $\gamma/^\circ$ | $\delta/^\circ$ |
|--------------|-----------------|----------------|-----------------|-----------------|
| <b>CppCl</b> | -0.76           | 125.79         | -0.85           | 0.13            |
| <b>CpmCl</b> | -0.38           | 126.03         | -0.82           | -0.28           |
| <b>CpoCl</b> | -0.16           | 90.71          | 4.96            | 0.67            |
| <b>CmpCl</b> | -1.09           | 125.97         | -0.88           | -0.13           |
| <b>CmmCl</b> | -0.52           | 126.82         | -0.90           | -0.32           |
| <b>CmoCl</b> | -0.97           | 90.59          | 5.06            | 0.69            |
| <b>CopCl</b> | -0.35           | 126.63         | -0.88           | -0.29           |
| <b>ComCl</b> | 0.18            | 127.09         | -0.94           | -0.58           |
| <b>CooCl</b> | -0.48           | 90.41          | 4.32            | 0.50            |

**Details as in the main body of manuscript.**

### 3.2.2. Conformational analysis results

#### 3.2.2.1. Potential energy surface (PES) scans of C-rings and Cl-rings in nine CxxCl conformers (rotamers)

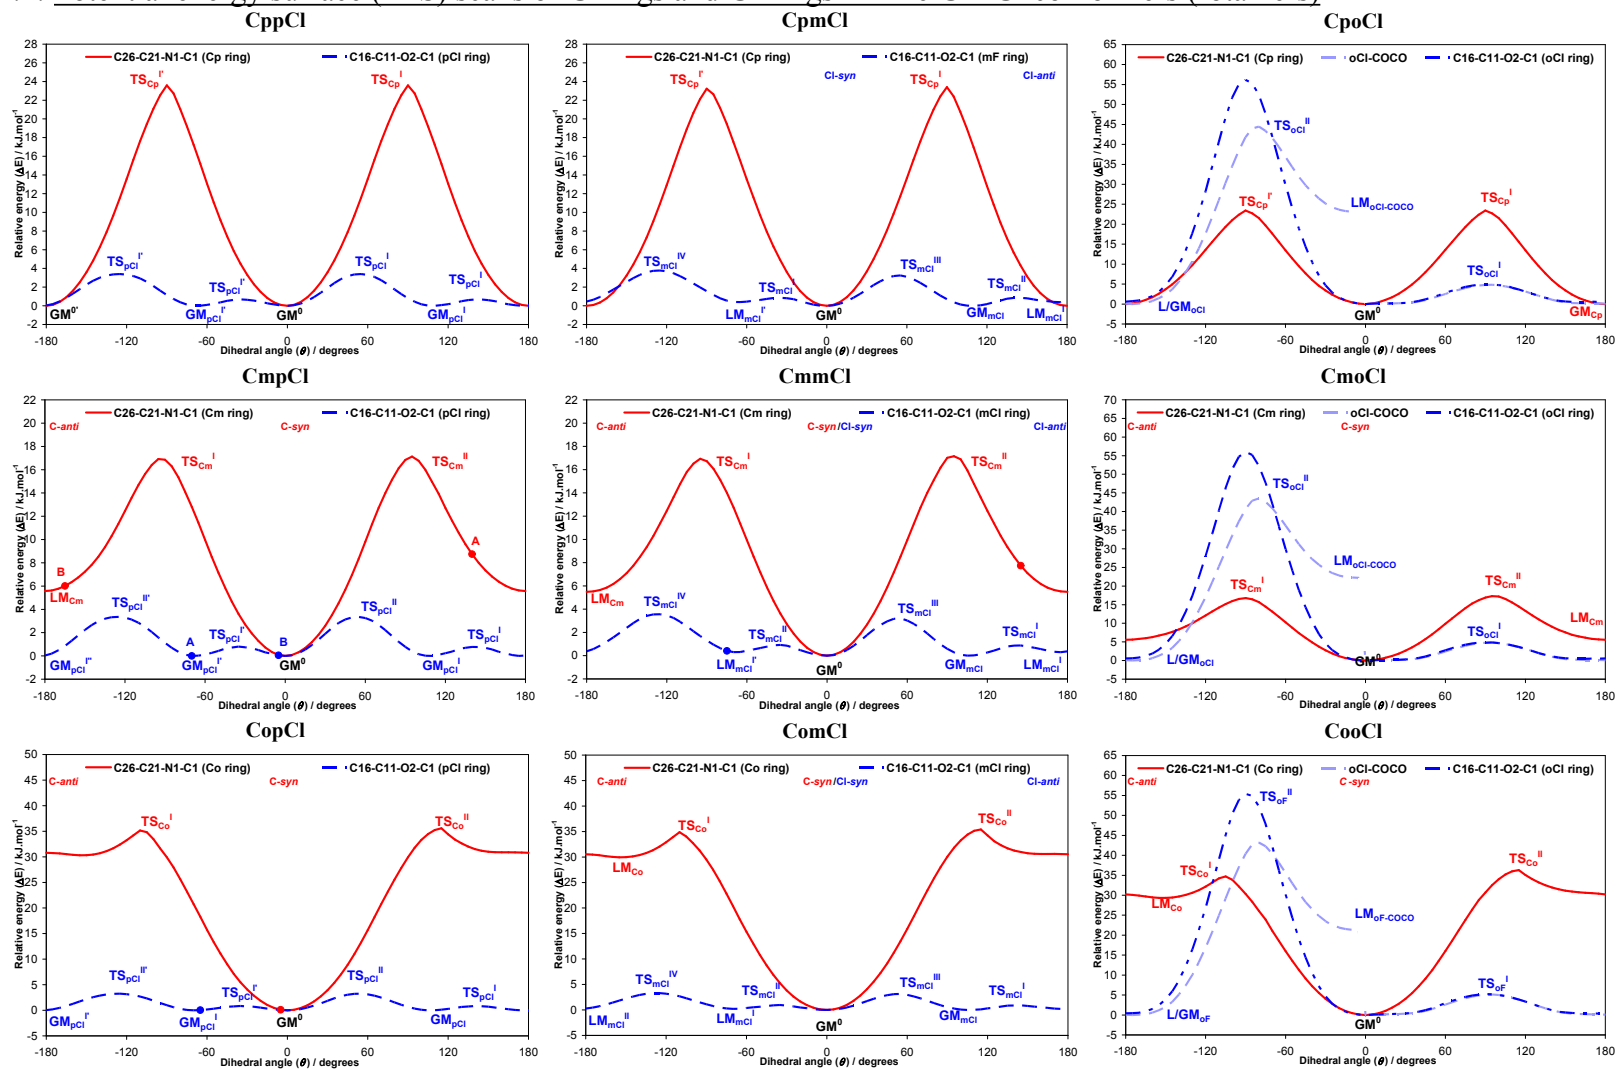

### 3.2.2.2. Potential energy surface (PES) scans of carbamate backbone dihedral angles in nine CxxCl conformers (rotamers)

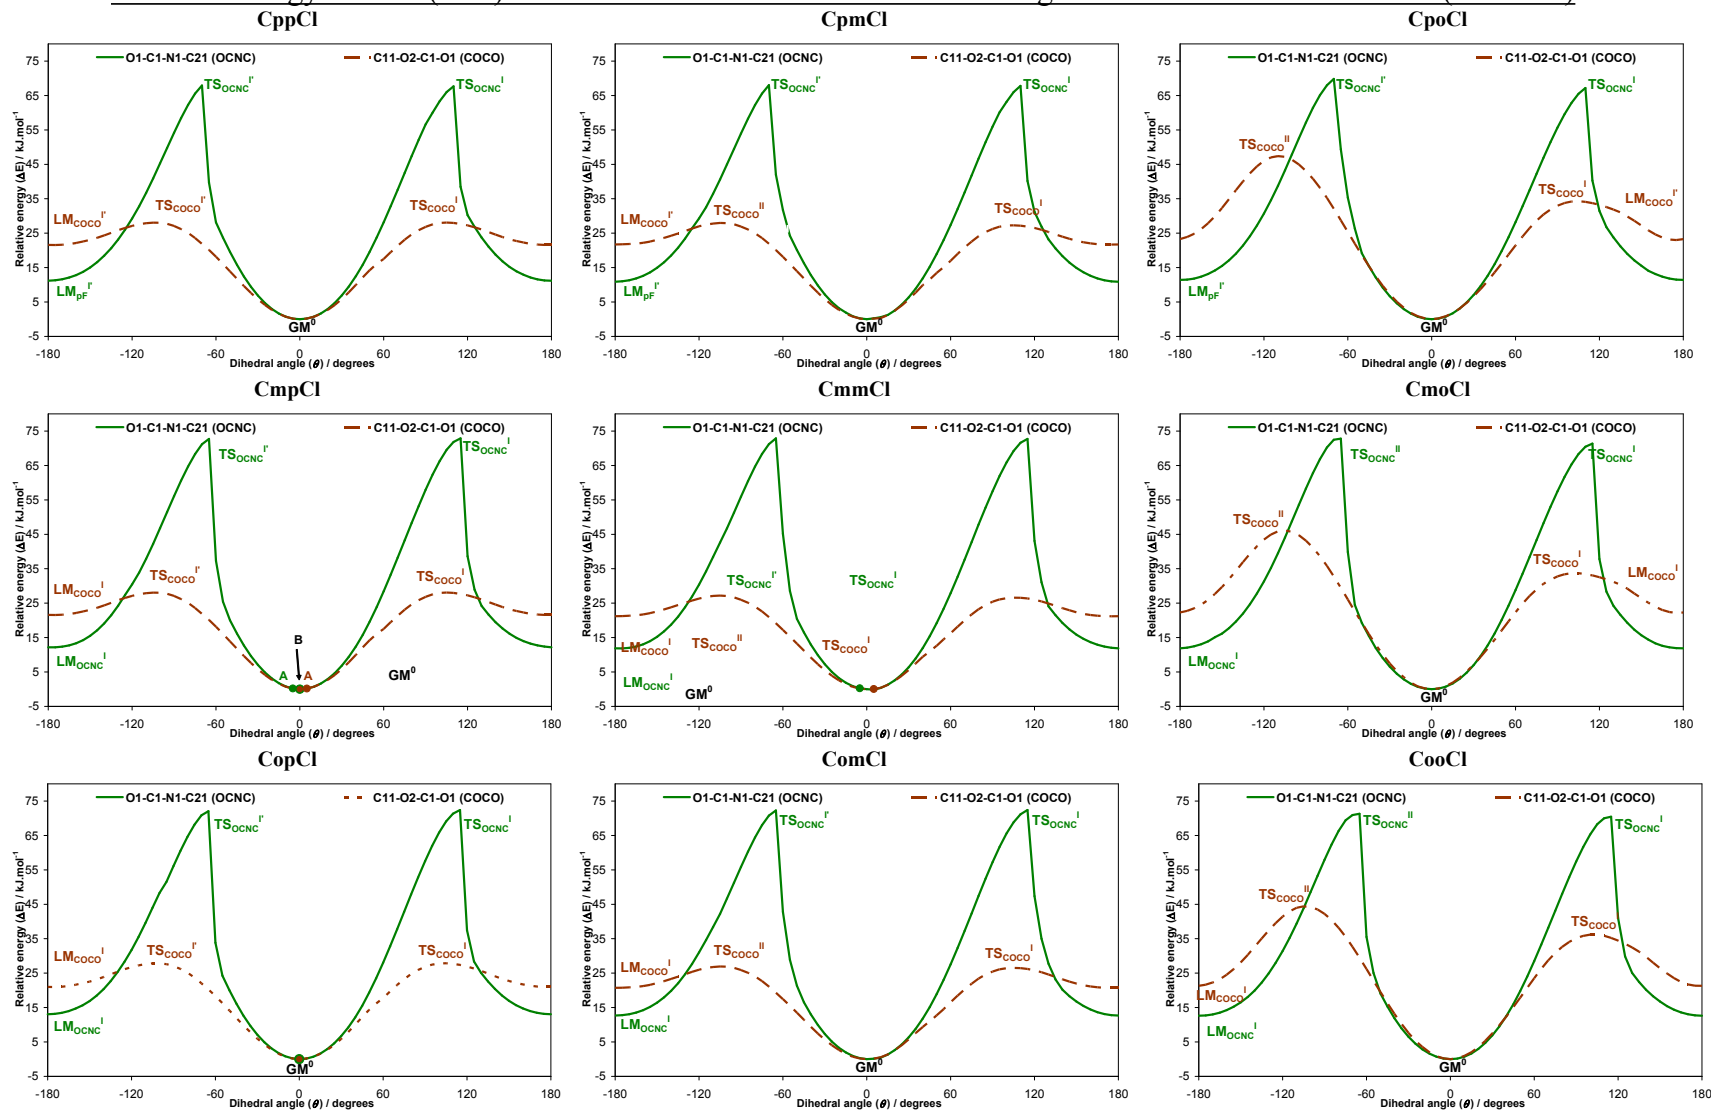

### **3.3. CxxBr isomer grid**

#### **3.3.1. CxxBr Optimisation results**

| <b>CxxBr</b> | $\alpha/^\circ$ | $\beta/^\circ$ | $\gamma/^\circ$ | $\delta/^\circ$ |
|--------------|-----------------|----------------|-----------------|-----------------|
| <b>CppBr</b> | -0.75           | 127.07         | -0.92           | 0.23            |
| <b>CpmBr</b> | -0.43           | 125.3          | -0.75           | -0.35           |
| <b>CpoBr</b> | 0.38            | 111.04         | 2.70            | 0.15            |
| <b>CmpBr</b> | -1.15           | 127.34         | -1.03           | 0.00            |
| <b>CmmBr</b> | 0.99            | 57.98          | 0.89            | 0.47            |
| <b>CmoBr</b> | -0.29           | 111.38         | 2.58            | -0.06           |
| <b>CopBr</b> | -0.38           | 127.93         | -0.99           | -0.20           |
| <b>ComBr</b> | -0.15           | 57.06          | 0.80            | 0.63            |
| <b>CooBr</b> | 0.12            | 110.21         | 1.82            | -0.30           |

**Details as in the main body of manuscript.**

### 3.3.2. Conformational analysis results

#### 3.3.2.1. Potential energy surface (PES) scans of C-rings and Br-rings in nine CxxBr conformers (rotamers)

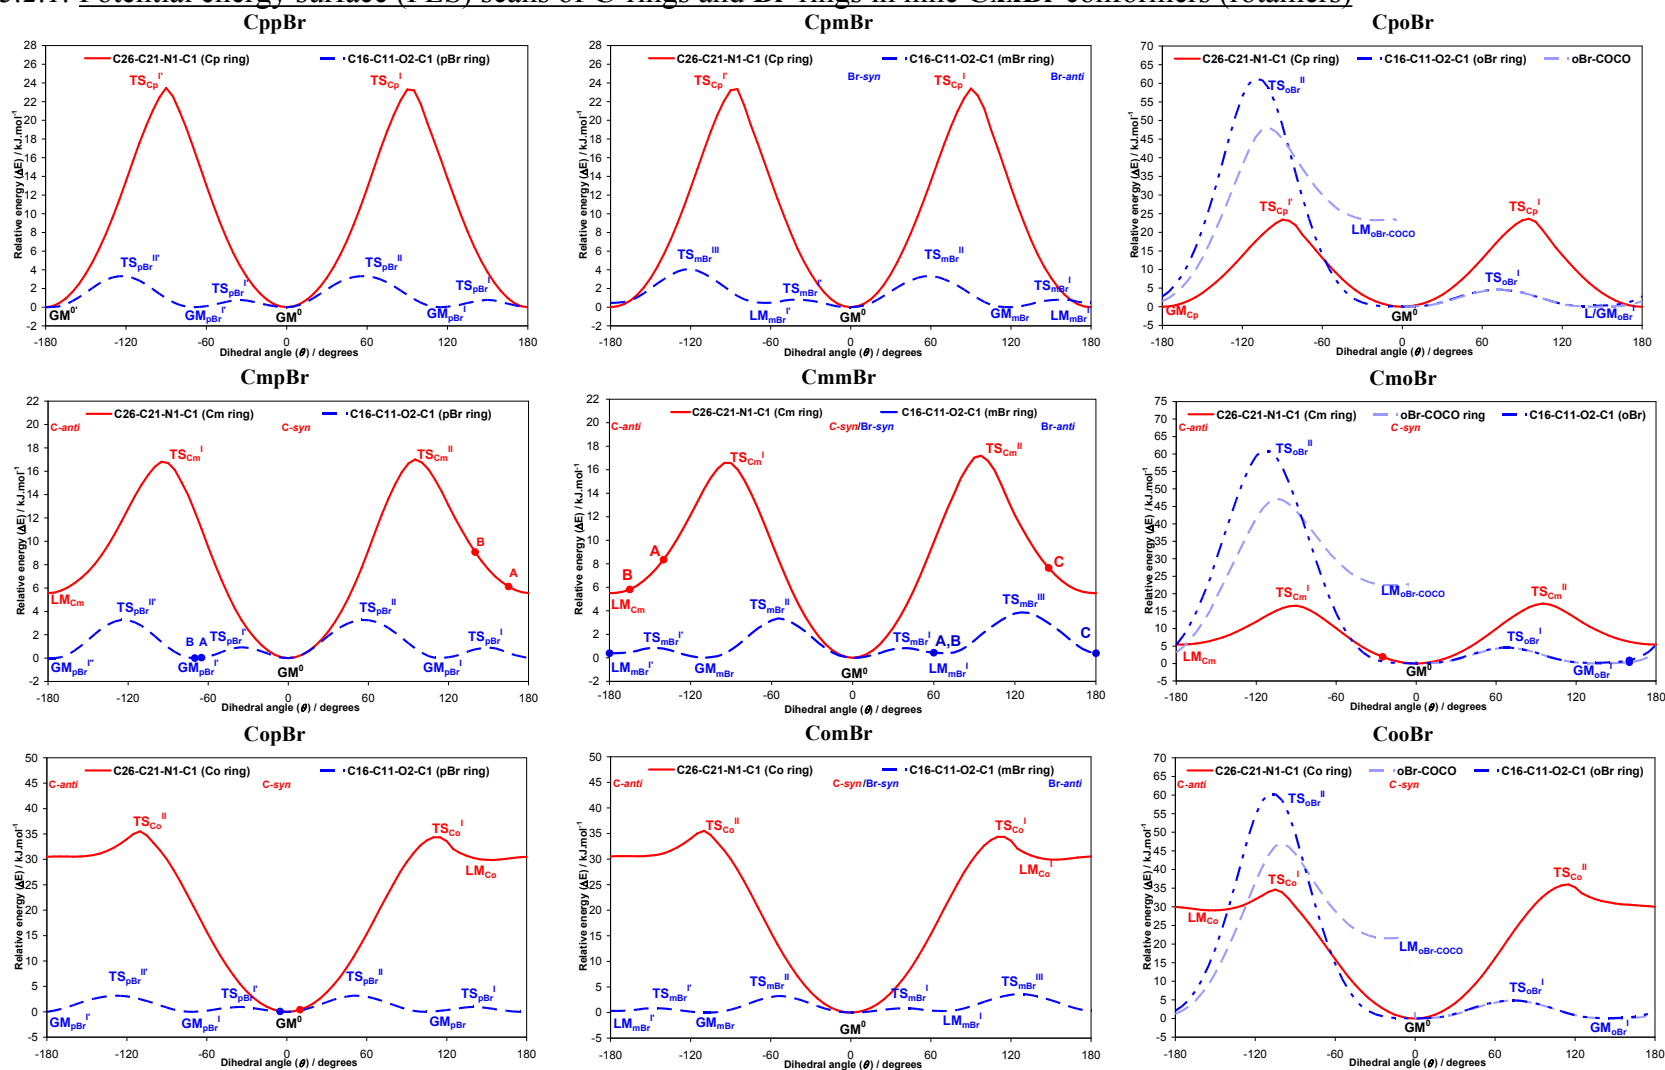

### 3.3.2.2. Potential energy surface (PES) scans of carbamate backbone dihedral angles in nine CxxBr conformers (rotamers)

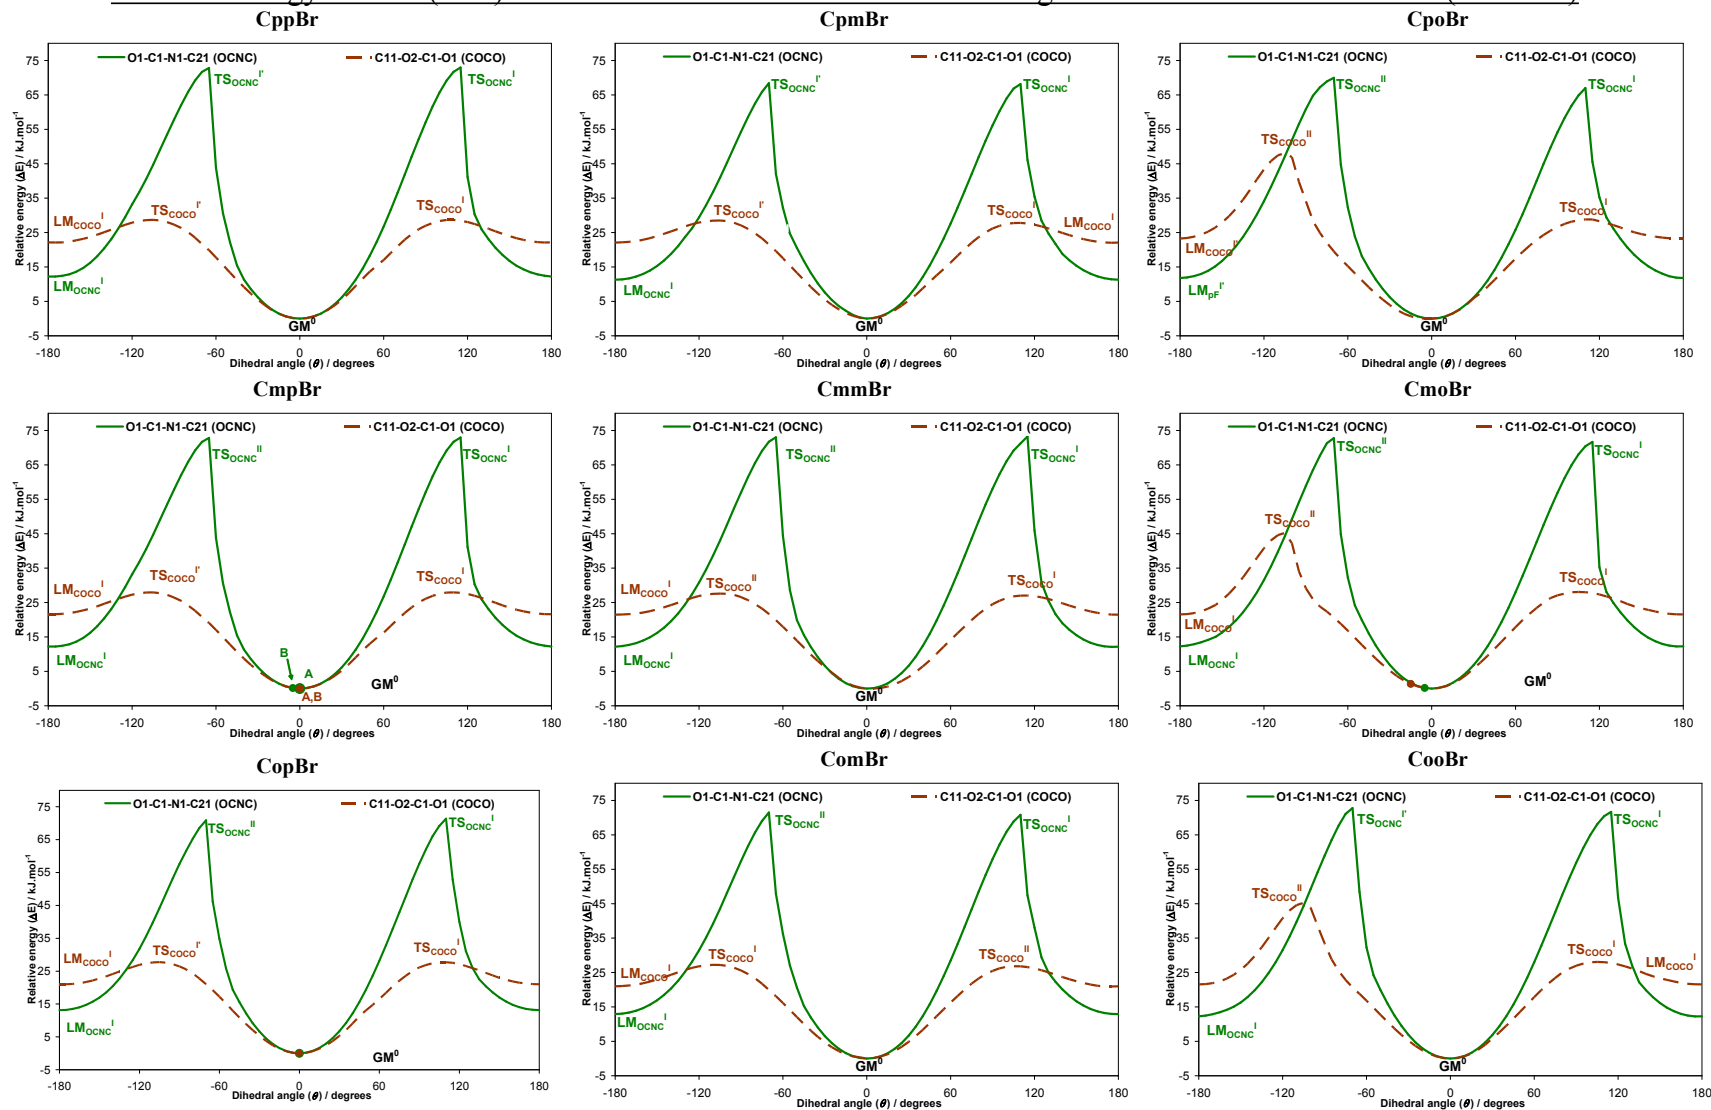

## SECTION 4:

**Table 3:** Summary of the **CxxX** isomer grids with selected structural features

| Isomer | Space group             | Z' | Hydrogen bonding in solid state | Conformation (solid-state) | Conformation Match (gas phase) | Amide H shift /ppm <sup>a</sup> |
|--------|-------------------------|----|---------------------------------|----------------------------|--------------------------------|---------------------------------|
| CppF   | -                       | -  | -                               | -                          | -                              | 7.30                            |
| CpmF   | -                       | -  | -                               | -                          | <b>F-anti</b>                  | 8.10                            |
| CpoF   | -                       | -  | -                               | -                          | -                              | 7.71                            |
| CmpF   | <i>Pc</i>               | 2  | N-H···N                         | <b>C-anti</b>              | <b>C-syn</b>                   | <b>✗</b> 7.82                   |
| CmmF   | <i>Cc</i>               | 1  | N-H···N                         | <b>C-anti/F-anti</b>       | <b>C-syn/F-anti</b>            | <b>✗</b> 8.10                   |
| CmoF   | -                       | -  | -                               | -                          | <b>C-syn</b>                   | - 8.26                          |
| CopF   | <i>PI</i>               | 1  | (N-H···N) <sub>2</sub> *        | <b>C-syn</b>               | <b>C-syn</b>                   | <b>✓</b> 9.47                   |
| CppCl  | -                       | -  | -                               | -                          | -                              | 7.98                            |
| CpmCl  | <i>P2<sub>1</sub></i>   | 1  | N-H···N                         | <b>Cl-anti</b>             | <b>Cl-syn</b>                  | <b>✗</b> 7.14                   |
| CpoCl  | -                       | -  | -                               | -                          | -                              | 8.04                            |
| CmpCl  | <i>Pc</i>               | 2  | N-H···N                         | <b>C-anti</b>              | <b>C-syn</b>                   | <b>✗</b> 7.49                   |
| CmmCl  | <i>Cc</i>               | 1  | N-H···N                         | <b>C-anti/Cl-anti</b>      | <b>C-syn/Cl-syn</b>            | <b>✗</b> 7.70                   |
| CmoCl  | -                       | -  | -                               | -                          | <b>C-syn</b>                   | - 8.40                          |
| CopCl  | <i>PI</i>               | 1  | (N-H···N) <sub>2</sub>          | <b>C-syn</b>               | <b>C-syn</b>                   | <b>✓</b> 9.43                   |
| ComCl  | -                       | -  | -                               | -                          | <b>C-syn/Cl-syn</b>            | - 9.58                          |
| CooCl  | -                       | -  | -                               | -                          | <b>C-syn</b>                   | - 10.5                          |
| CppBr  | -                       | -  | -                               | -                          | -                              | 7.09                            |
| CpmBr  | -                       | -  | -                               | -                          | <b>Br-syn</b>                  | - 7.27                          |
| CpoBr  | -                       | -  | -                               | -                          | -                              | 8.22                            |
| CmpBr  | <i>Pc</i>               | 2  | N-H···N                         | <b>C-anti</b>              | <b>C-syn</b>                   | <b>✗</b> 7.83                   |
| CmmBr  | <i>P2<sub>1</sub></i>   | 3  | N-H···N                         | <b>C-anti/Br-anti</b>      | <b>C-syn/Br-syn</b>            | <b>✗</b> 8.08                   |
| CmoBr* | <i>P2<sub>1</sub>/c</i> | 1  | (N-H···O-H) <sub>2</sub>        | <b>C-syn</b>               | <b>C-syn</b>                   | <b>✓</b> 8.06                   |
| CopBr  | <i>P2<sub>1</sub>/n</i> | 1  | (N-H···N) <sub>2</sub>          | <b>C-syn</b>               | <b>C-syn</b>                   | <b>✓</b> 9.36                   |
| ComBr  | -                       | -  | -                               | -                          | <b>C-syn/Br-syn</b>            | - 10.0                          |

<sup>a</sup> in CDCl<sub>3</sub>, \* monohydrate

## SECTION 5: Examples of Crystal growth for the CopX triad.

The three **CopX** crystal samples serve as examples of needle-like and filamentous growth in the **CxxX** series.

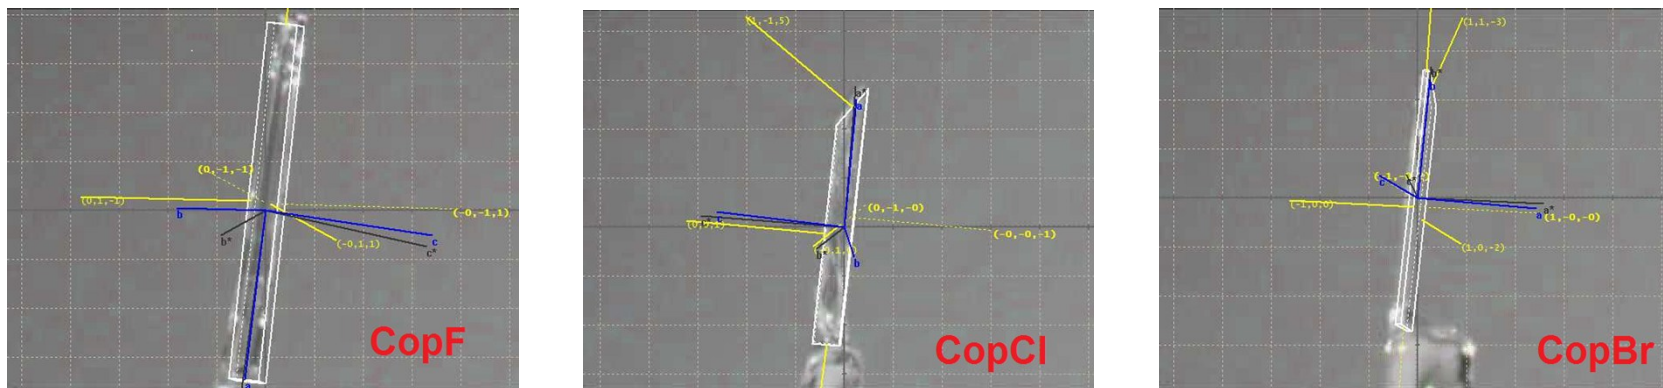

|                                           |                                            |                     |
|-------------------------------------------|--------------------------------------------|---------------------|
| <b>CopF</b> _(CHCl <sub>3</sub> :acetone) | <b>CopCl</b> _(CHCl <sub>3</sub> :acetone) | <b>CopBr</b> _(THF) |
| 0.73 × 0.06 × 0.03                        | 0.53 × 0.05 × 0.03                         | 0.52 × 0.07 × 0.01  |

The three **CopX** are representative of the crystal growth characteristics of the **CxxX** series of compounds and crystallise as needles that diffract. At least half of the **CxxX** crystal samples (as grown from a variety of solvent conditions) crystallise as very thin fibres or 'whiskers' that bend very easily and don't diffract on a conventional in-house X-ray diffractometer.



## SECTION 6: MELTING POINT ANALYSIS OF CXXX

Melting Point  
Analysis  
of CxxX

| CxxF | pF           | mF         | oF           |
|------|--------------|------------|--------------|
| Cp   | 184          | 162        | 168          |
| Cm   | 166          | 152        | 135          |
| Co   | 179          | /          | /            |
|      | <b>176.3</b> | <b>157</b> | <b>151.5</b> |

Averages

**171.3**

**151**

**179**

Analysis and trends

| CxxCl | pCl          | mCl          | oCl        |
|-------|--------------|--------------|------------|
| Cp    | 198          | 195          | 169        |
| Cm    | 174          | 170          | 124        |
| Co    | 199          | 174          | 145        |
|       | <b>190.3</b> | <b>179.7</b> | <b>146</b> |

**187.3**

**156**

**172.7**

| CxxBr | pBr        | mBr        | oBr          |
|-------|------------|------------|--------------|
| Cp    | 206        | 193        | 168          |
| Cm    | 169        | 154        | 87           |
| Co    | 195        | 175        | /            |
|       | <b>190</b> | <b>174</b> | <b>127.5</b> |

**189**

**136.7**

**185**

|      | X = F | Cl    | Br    | Averages     |
|------|-------|-------|-------|--------------|
| CpxX | 171.3 | 187.3 | 189   | <b>182.5</b> |
| CmxX | 151   | 156   | 136.7 | <b>147.9</b> |
| CoxX | 179   | 172.7 | 185   | <b>178.9</b> |

Cp

**CpxX > CoxX > CmxX**

Cm

For *para-/meta/ortho-* N-pyridine rings

Co

182.5 > 179 > 148°C

|      | X = F | Cl    | Br    | Averages     |
|------|-------|-------|-------|--------------|
| CxpX | 176.3 | 190.3 | 190   | <b>185.5</b> |
| CxmX | 157   | 179.7 | 174   | <b>170.2</b> |
| CxoX | 151.5 | 146   | 127.5 | <b>141.7</b> |

pX

**CxpX > CxmX > CxoX**

mX

For *para-/meta-/ortho-* X-halogenated rings

oX

185.5 > 170 > 142°C
